# Supplementary material for: Synthesis of functionalized tetrahydro-1,3-diazepin-2-ones and 1-carbamoyl-1H-pyrroles viaring expansion and ring expansion/ring contraction of tetrahydropyrimidines
Source: Royal Society of Chemistry journal article supplement (doi:10.1039/c1ob06284k), 2011-09-27
Supplement: c1ob06284k.pdf [file c1ob06284k.pdf]

## Supporting Information

### Synthesis of functionalized tetrahydro-1,3-diazepin-2-ones and 1-carbamoyl-1*H*-pyrroles via ring expansion and ring expansion/ring contraction of tetrahydropyrimidines

Anastasia A. Fesenko, Ludmila A. Trafimova and Anatoly D. Shutalev\*

*Department of Organic Chemistry, Moscow State Academy of Fine Chemical Technology, 86  
Vernadsky Avenue, 119571, Moscow, Russian Federation*

#### Table of Contents

|    |                                                                                                                                                                                                                            |    |
|----|----------------------------------------------------------------------------------------------------------------------------------------------------------------------------------------------------------------------------|----|
| 1. | A multi-gram scale synthesis of <i>N</i> -[(2-benzoyloxy-1-tosyl)ethyl]urea ( <b>9</b> )                                                                                                                                   | 2  |
| 2. | Copies of <sup>1</sup> H and <sup>13</sup> C NMR spectra of all the synthesized compounds in DMSO- <i>d</i> <sub>6</sub><br>(Bruker DPX 300 spectrometer at 300.13 MHz ( <sup>1</sup> H) and 75.48 MHz ( <sup>13</sup> C)) | 6  |
| 3. | Copies of IR spectra of all the synthesized compounds in Nujol<br>(Bruker Vector 22 spectrophotometer)                                                                                                                     | 60 |

### Synthesis of *N*-[(2-benzoyloxy-1-tosyl)ethyl]urea (**9**)

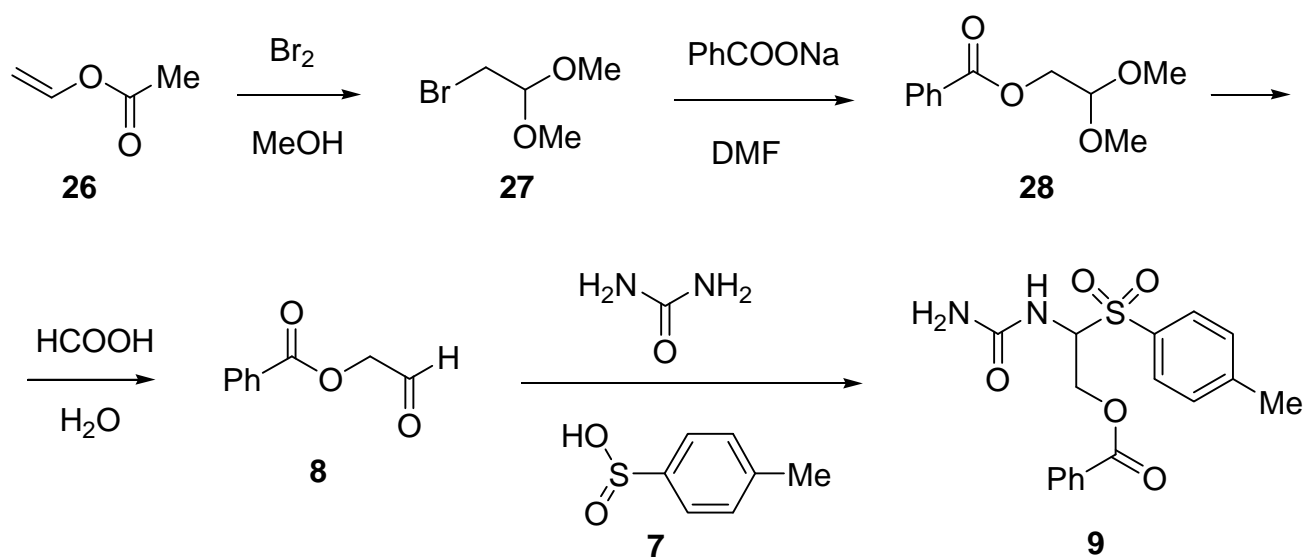

**General:** Our experience shows that both yield and purity of the products (*Note 1*) formed in the reaction of enolates of  $\alpha$ -functionalized ketones with  $\alpha$ -tosyl-substituted *N*-alkylureas and *N*-alkylthioureas strongly depend on purity of starting electrophilic reagents. When aldehyde (*Note 2*) and *p*-toluenesulfonic acid (*Note 3*) are appropriate, the three-component condensation of aldehyde, *p*-toluenesulfonic acid and urea or thiourea proceeds smoothly and gives the high yield of pure product. The problem which arose when we tried to use the procedure described in ref.<sup>1</sup> was that the diethylacetal of 2-benzoyloxyethanal could not be distilled at 0.1 mm Hg. When we tried (5 times) to distill this compound it decomposed each time at the beginning of distillation. Use of crude material as reported in ref.<sup>1</sup> for hydrolysis led to formation of 2-benzoyloxyethanal (**8**) with inappropriate purity for the following condensation *even* after distillation. This was the reason why we used dimethylacetal of 2-chloroethanal as a starting material in the reaction with sodium benzoate ( $\text{DMF}$ , reflux, 61 h).<sup>2</sup> The product formed, dimethylacetal of 2-benzoyloxyethanal (**28**), could be successfully distilled at 0.1 mm Hg. Hydrolysis of **28** gave aldehyde **8**, which after distillation was successfully used for the preparation of *N*-[(2-benzoyloxy-1-tosyl)ethyl]urea (**9**) in high yield and purity. But the prolonged time of reaction of dimethylacetal of 2-chloroethanal with sodium benzoate and the low yield of the product (40%) initiated our further efforts to improve the preparation of dimethylacetal of 2-benzoyloxyethanal (**28**). This was achieved by using dimethylacetal of 2-bromoethanal (**27**) in reaction with sodium benzoate.

**Dimethylacetal of 2-bromoethanal (27):**  $\text{MeOH}$  (140 mL) (*Note 4*) was charged to a 500 mL three-neck round-bottom flask equipped with a magnetic stirring bar, two dropping funnels and a thermometer. The flask was cooled in an ice-cold bath or  $\text{NaCl}/\text{ace}$  bath (*Note 5*) and the reagents,  $\text{Br}_2$

(102.98 g, 0.64 mol) and vinyl acetate (55.52 g, 0.64 mol) (*Note 6*), were simultaneously added under vigorous stirring dropwise at the rate when the internal temperature was not higher than 5 °C. The resulting colorless solution (*Note 7*) was left overnight at room temperature. The flask was cooled (−10 °C) and the reaction mixture was poured into a 1 L glass cooled in an ice-cold bath and charged with ice-cold H<sub>2</sub>O (80 mL) and NaHCO<sub>3</sub> (56.10 g, 0.67 mol) under vigorous stirring using a magnetic stirrer. Then CH<sub>2</sub>Cl<sub>2</sub> (80 mL) was added and the liquids were stirred under cooling in an ice-bath for 30 min until the foam had disappeared. The organic layer was separated, the water layer was extracted with CH<sub>2</sub>Cl<sub>2</sub> (10 and 30 mL), the combined organic phase was washed with brine (20 mL), dried over Na<sub>2</sub>SO<sub>4</sub> for 30 min, filtered, CH<sub>2</sub>Cl<sub>2</sub> was removed under reduced pressure and the fraction collected at 70–82 °C/80 mm Hg (84.06 g, 77%) was immediately used in the reaction with sodium benzoate.

**Dimethylacetal of 2-benzoyloxyethanal (28):** A two-necked 2 L round-bottom flask equipped with a mechanical stirrer and reflux condenser was charged with dimethylacetal of 2-bromoethanal (**27**) (64.41 g, 0.38 mol), sodium benzoate (60.92 g, 0.42 mol) and DMF (440 mL) (*Note 8*). The reaction mixture was refluxed for 5 h under vigorous stirring (*Note 9*), cooled, diluted with H<sub>2</sub>O (440 mL) and extracted with AcOEt (5 × 150 mL) (*Note 10*). The combined extracts were washed with H<sub>2</sub>O (4 × 75 mL) and dried with Na<sub>2</sub>SO<sub>4</sub> (*Note 11*). The solvent was removed under reduced pressure and the residue was distilled at 86–102 °C/0.1 mm Hg to give 55.79 g (70%) of dimethylacetal of 2-benzoyloxyethanal (**28**) as a slightly yellow liquid.

**2-Benzoyloxyethanal (8):** To dimethylacetal of 2-benzoyloxyethanal (**28**) (55.79 g, 0.27 mol) was added 80% aqueous HCOOH (500 mL) and the obtained solution was stirred at room temperature for 4 h. The solvent was removed under vacuum, the residue was dissolved in CHCl<sub>3</sub> (300 mL), the solution was washed with satd. aqueous NaHCO<sub>3</sub>, water, brine, dried over Na<sub>2</sub>SO<sub>4</sub> (*Note 12*), filtered, the solvent was removed under vacuum, and the residue was distilled at 95–98 °C/0.1 mm Hg to give 2-benzoyloxyethanal (**8**) (32.91 g, 76%) as an almost uncolored liquid (*Note 13*), which was immediately used in the next stage (*Note 14*).

**N-[(2-Benzoyloxy-1-tosyl)ethyl]urea (9):** To a fine emulsion of 2-benzoyloxyethanal (**8**) (16.73 g, 0.1 mol) (*Note 15*) in H<sub>2</sub>O (100 mL) at room temperature under vigorous stirring using a magnetic stirrer was added *p*-toluenesulfinic acid (16.02 g, 0.1 mol) and H<sub>2</sub>O (30 mL) (*Note 16*). To the obtained suspension was added urea (30.61 g, 0.51 mol) and H<sub>2</sub>O (30 mL). The reaction mixture was stirred at room temperature for 20 h (*Note 17*), cooled to 0 °C, the precipitate was filtered off, carefully washed with ice-cold water, petroleum ether (*Note 18*), and dried over P<sub>2</sub>O<sub>5</sub> (*Note 19*) to give 34.6 g (97%) (*Note 20*) of **9**, which was used without further purification.

## Notes

1. In most cases, high yield means good purity.
2. Aldehyde should be purified by distillation or otherwise.
3. M.p. about 81 °C (clear melt).
4. We used distilled MeOH (99.5%).
5. Upon cooling in a NaCl/salt bath the addition of the reagents could be faster (compared with ice-bath). After addition of both reagents the internal temperature of reaction mixture should be monitored, because it may rise if the bath was removed immediately after addition of the reagents.
6. Purchased from Aldrich (99 %+ ) without distillation.
7. The resulting solution could be slightly yellowish due to impurities in bromine. It is necessary to put attention on coloring, because no excess of Br<sub>2</sub> could be allowed to remain in the reaction mixture. Extra quantity of vinyl acetate should be added to react with residual Br<sub>2</sub>.
8. DMF was dried over KOH pellets and distilled.
9. After about 1 h from the beginning of the reaction the precipitate becomes very fine and can accumulate in the bottom of the flask. It can cause bumping of the reaction mixture.
10. The first portion of AcOEt significantly dissolves in the solution formed, but at the end of extraction about 600 mL of extract was collected. The extraction was always complicated to a greater or lesser extent by the formation of an dark insoluble material during the reaction, and sometimes it was difficult to determine the interface of phases (in especially difficult cases use of the bright lamp helped). Each time after separation, the organic layer was filtered through a cotton wool plug, thus the dark material was partially separated. When the filtration became very slow the cotton wool plug was changed and the filtration repeated. The filtration through a cotton wool plug was also made after each washing of the combined extract with H<sub>2</sub>O. All this makes the extraction very laborious, it takes about 3 h. The final combined extract was brown clear liquid.
11. Silica gel (0.1–0.4 mm), previously activated by heating at 100 °C for 1 h, was also added. It additionally removed some dark coloring.
12. The extract may stay not quite clear after drying. Silica gel (0.1–0.4 mm), previously activated by heating at 100 °C for 1 h, was also added.
13. At the end of distillation some amount of yellow colored product may come. It is not so essential for further reaction but should be avoided if possible.
14. The aldehyde was distilled into two 250 mL round-bottom flasks in roughly equal amounts. After the mass of each portion of aldehyde was measured, H<sub>2</sub>O (50 mL) was immediately added to aldehyde to prevent oxidation. Thus the final stage proceeded in two flasks.

15. The maximal amount of the aldehyde was about 25 g. This amount should not be exceeded, because in this case the synthesis becomes *very* laborious.
16. After addition of *p*-toluenesulfonic acid, the oily solid formed and starting from this moment it must be triturated with spatula. After about 5–7 min it becomes solid and it is very important that no big pieces of solid formed. It is very hard to crush big pieces, but if all was done as described their formation was prevented. The practically fine suspension formed after trituration and it could be effectively stirred to remove the rest of the small pieces. Only after formation of the fine suspension urea should be added.
17. The mixture may become very dense after about 6–7 h from the beginning of the reaction. In this case it should be shaken periodically, once it becomes fluid again it can be stirred by the stirrer and it did not become dense again.
18. The precipitate was washed 4 times. After each washing the cake was formed on a filter to remove the water more completely, the next portion of water was the same high as the cake; the cake was carefully crushed and washed to remove the excess of urea. After the last washing with water some amount of petroleum ether (about 20–30 mL) was passed through the cake without crushing, then the cake was washed twice with petroleum ether and after the second time no cake was formed. After petroleum ether was removed by passing air through the filter, the product became a white solid.
19. The solid holds a lot of water, drying must be performed as fast as possible (in a big vacuum desiccator) and P<sub>2</sub>O<sub>5</sub> must be changed every hour (for 5–6 times) until most part of water was removed from product. Attention should be paid on that the internal temperature of desiccator did not rise because of intensive absorption of water by P<sub>2</sub>O<sub>5</sub>, the product may decompose because of this heat. Complete drying of the product takes 2–3 days.
20. It is the best yield; the average yields are about 92–94%.

## References

- 1 J. Du, K. A. Watanabe, *Synth. Commun.*, 2004, **34**, 1925–1930.
- 2 A. A. Fesenko, M. L. Tullberg, A. D. Shutalev, *Tetrahedron*, 2009, **65**, 2344–2350.

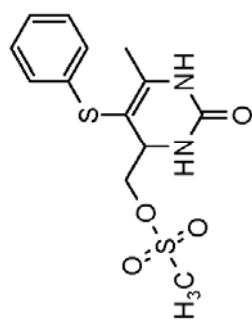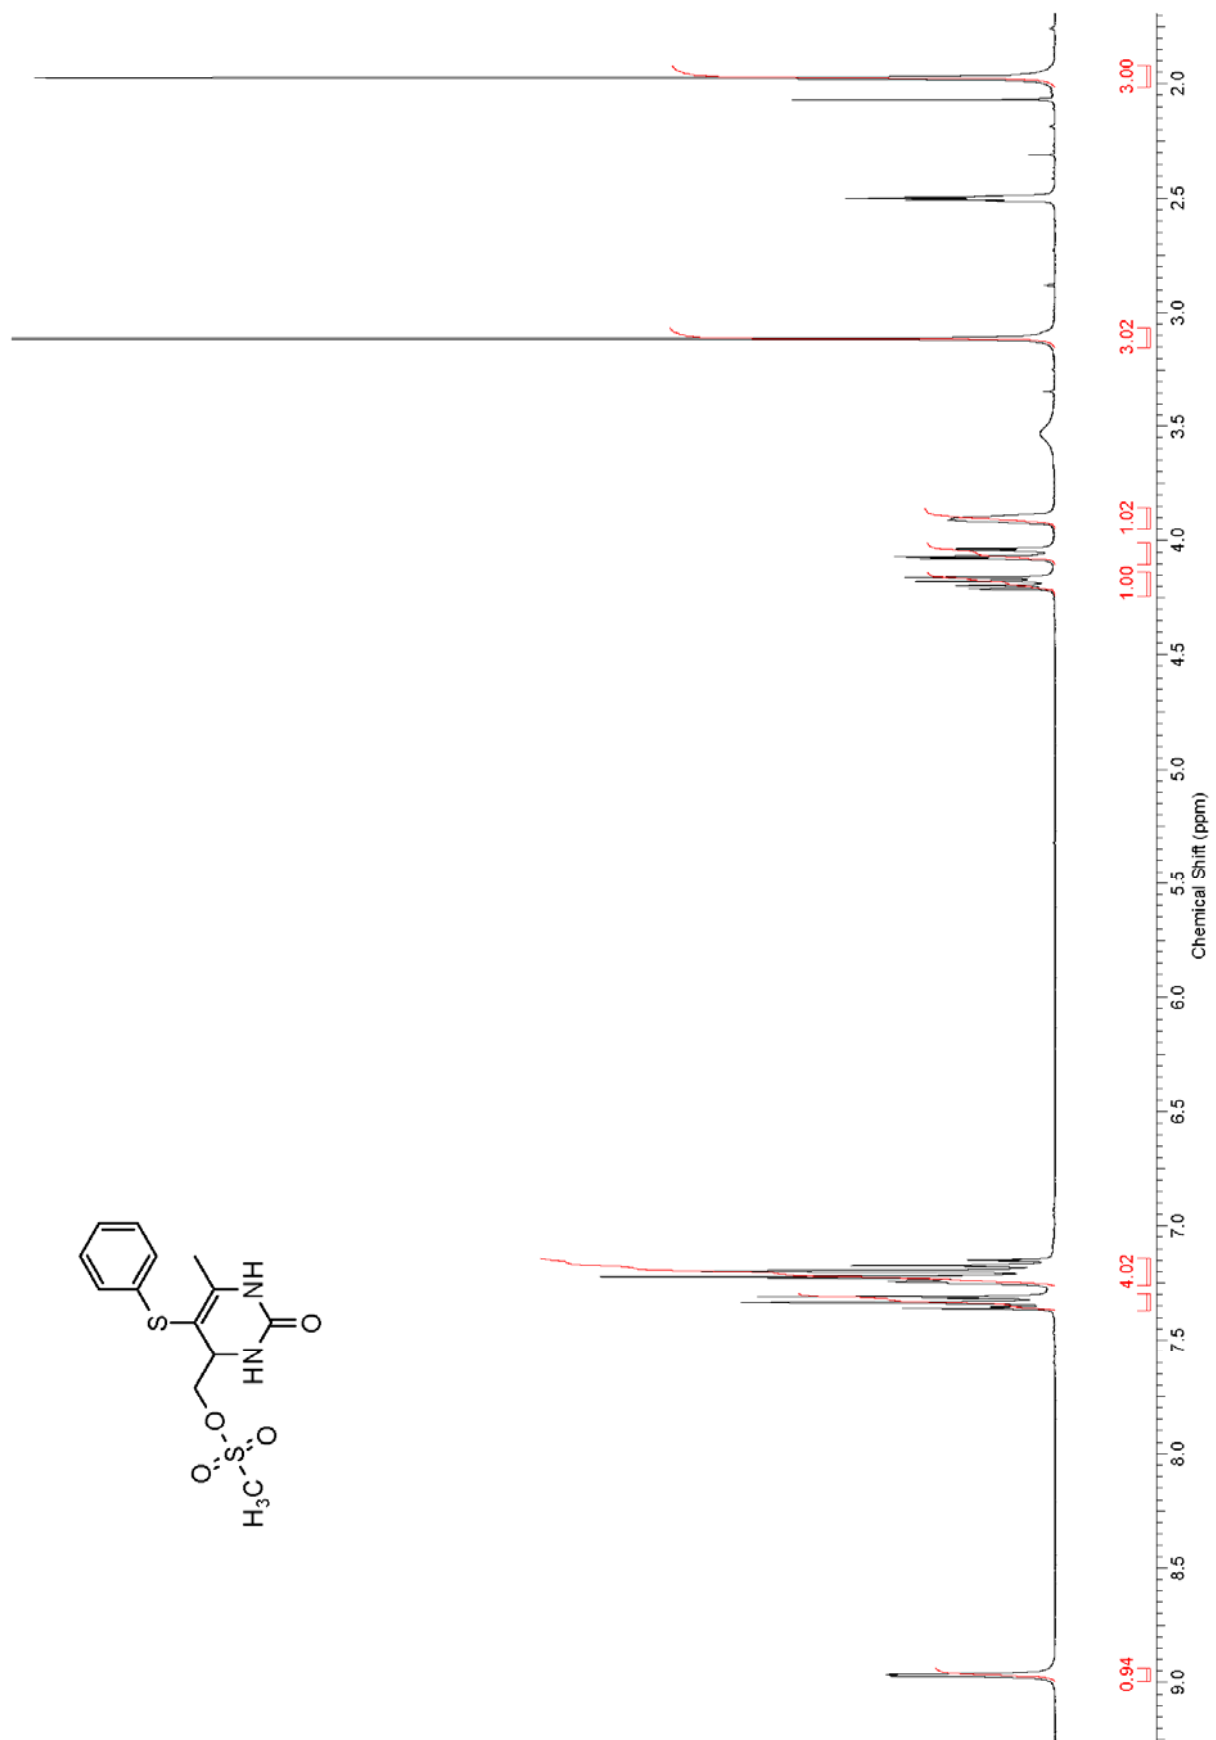

<sup>1</sup>H NMR spectrum of **6a** in DMSO-d<sub>6</sub>, Bruker DPX 300

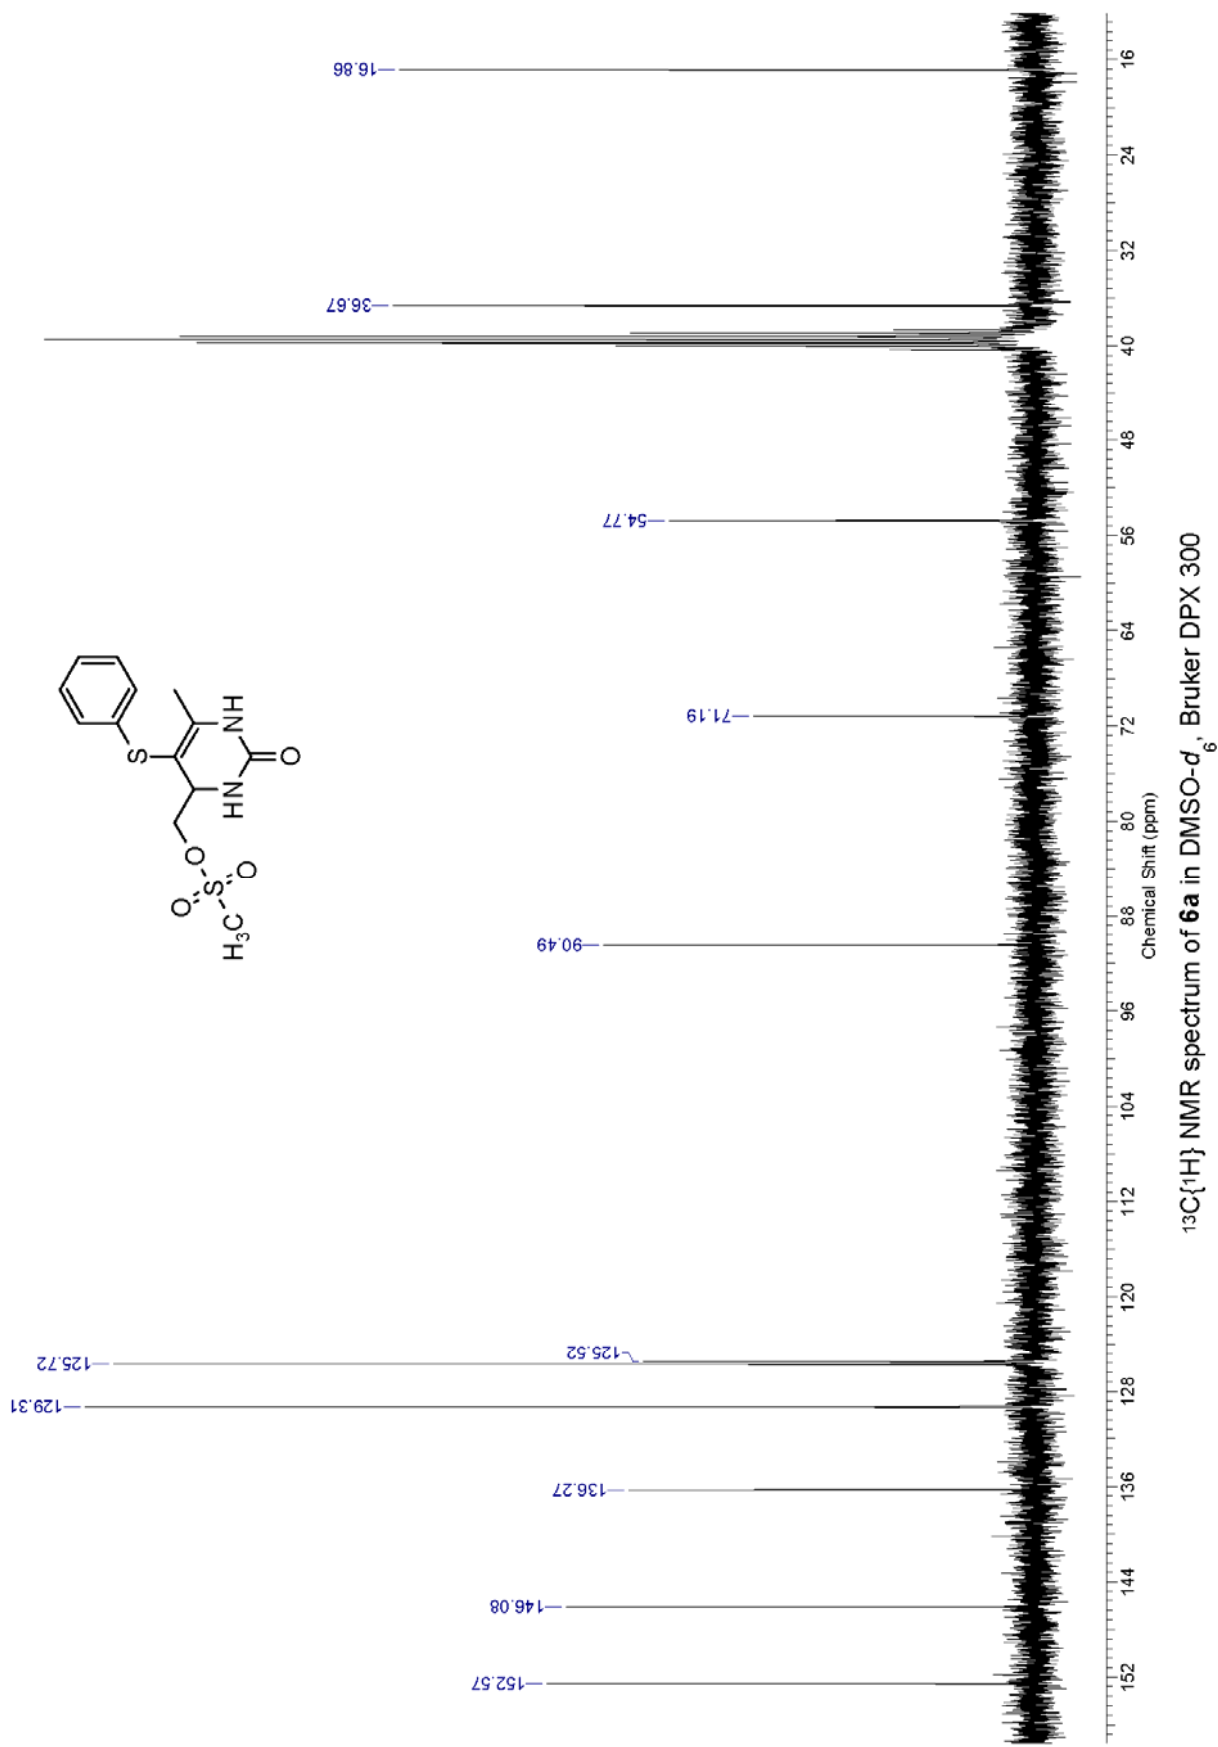

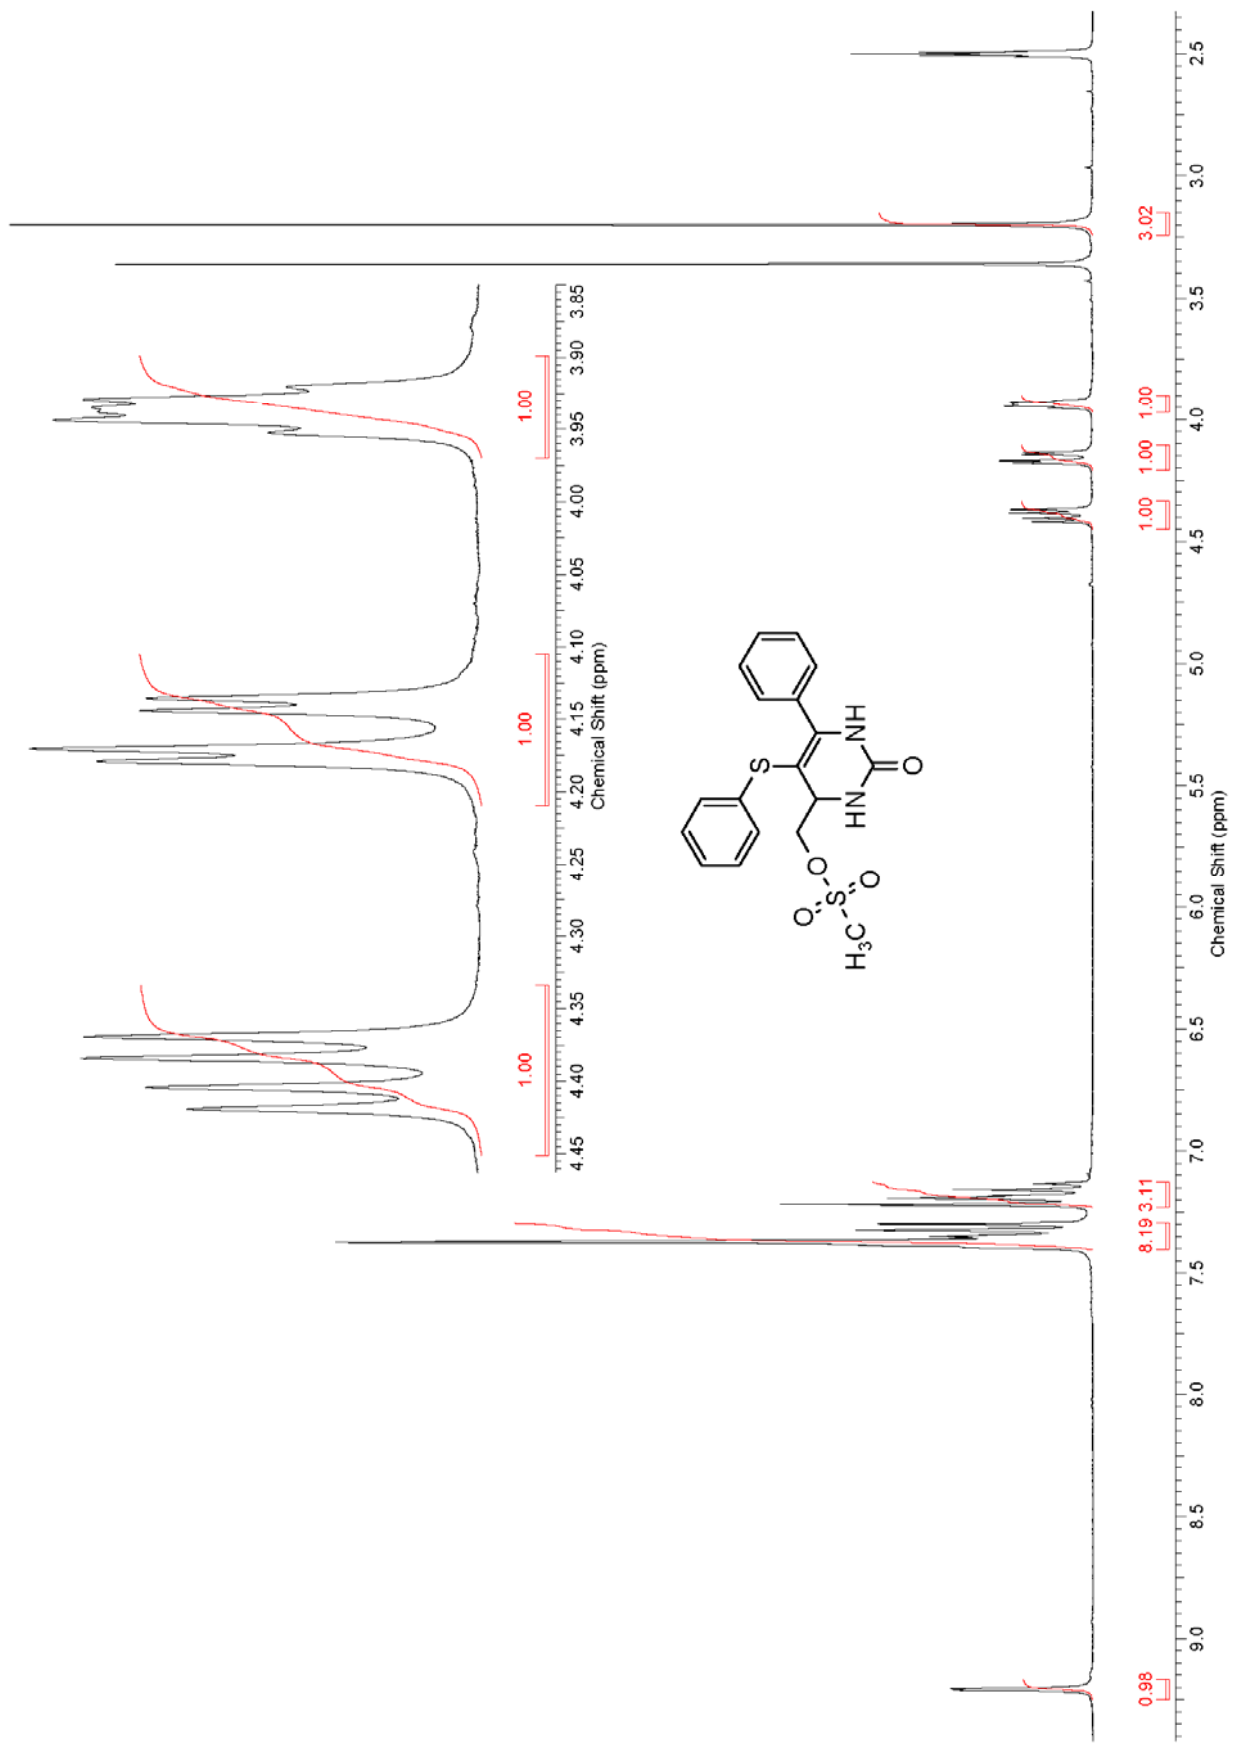

<sup>1</sup>H NMR spectrum of **6b** in DMSO-d<sub>6</sub>, Bruker DPX 300



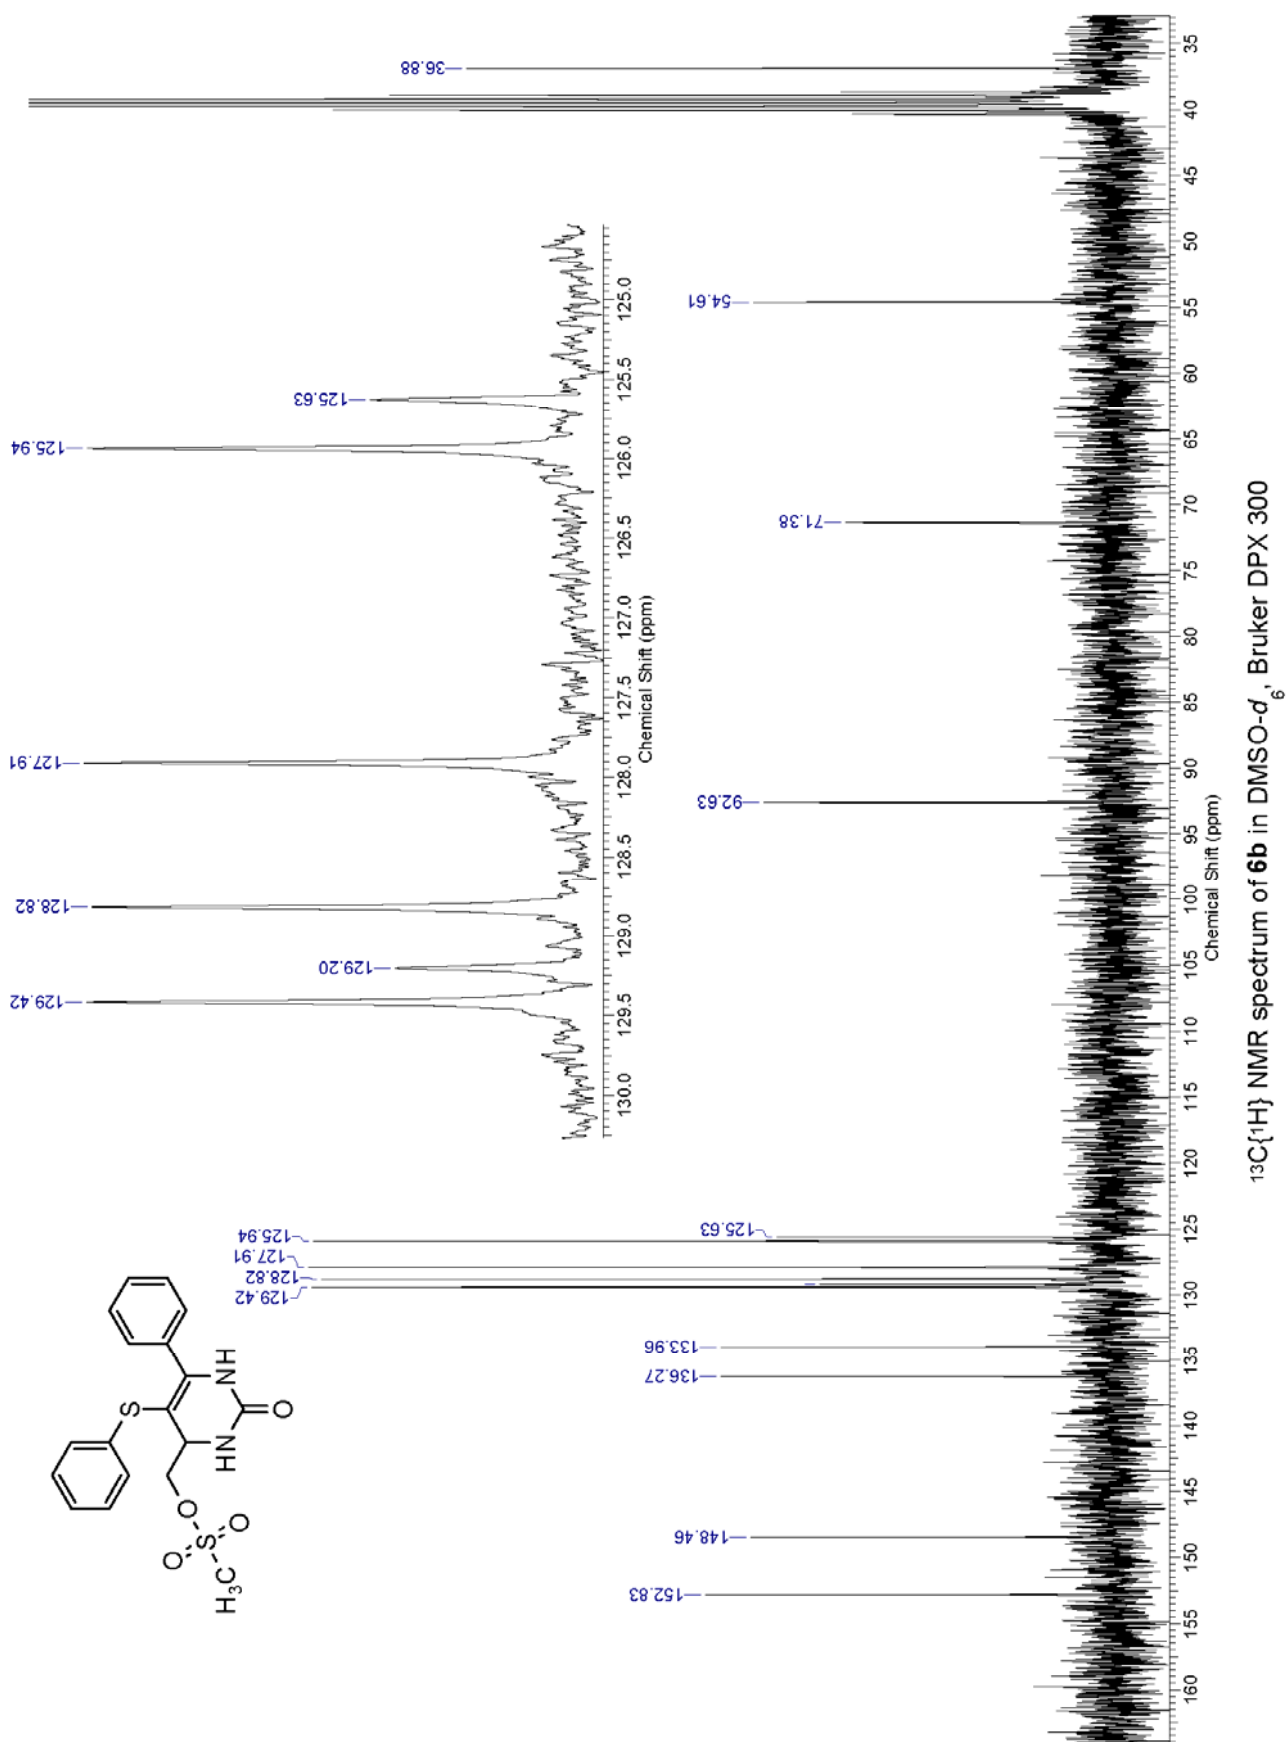

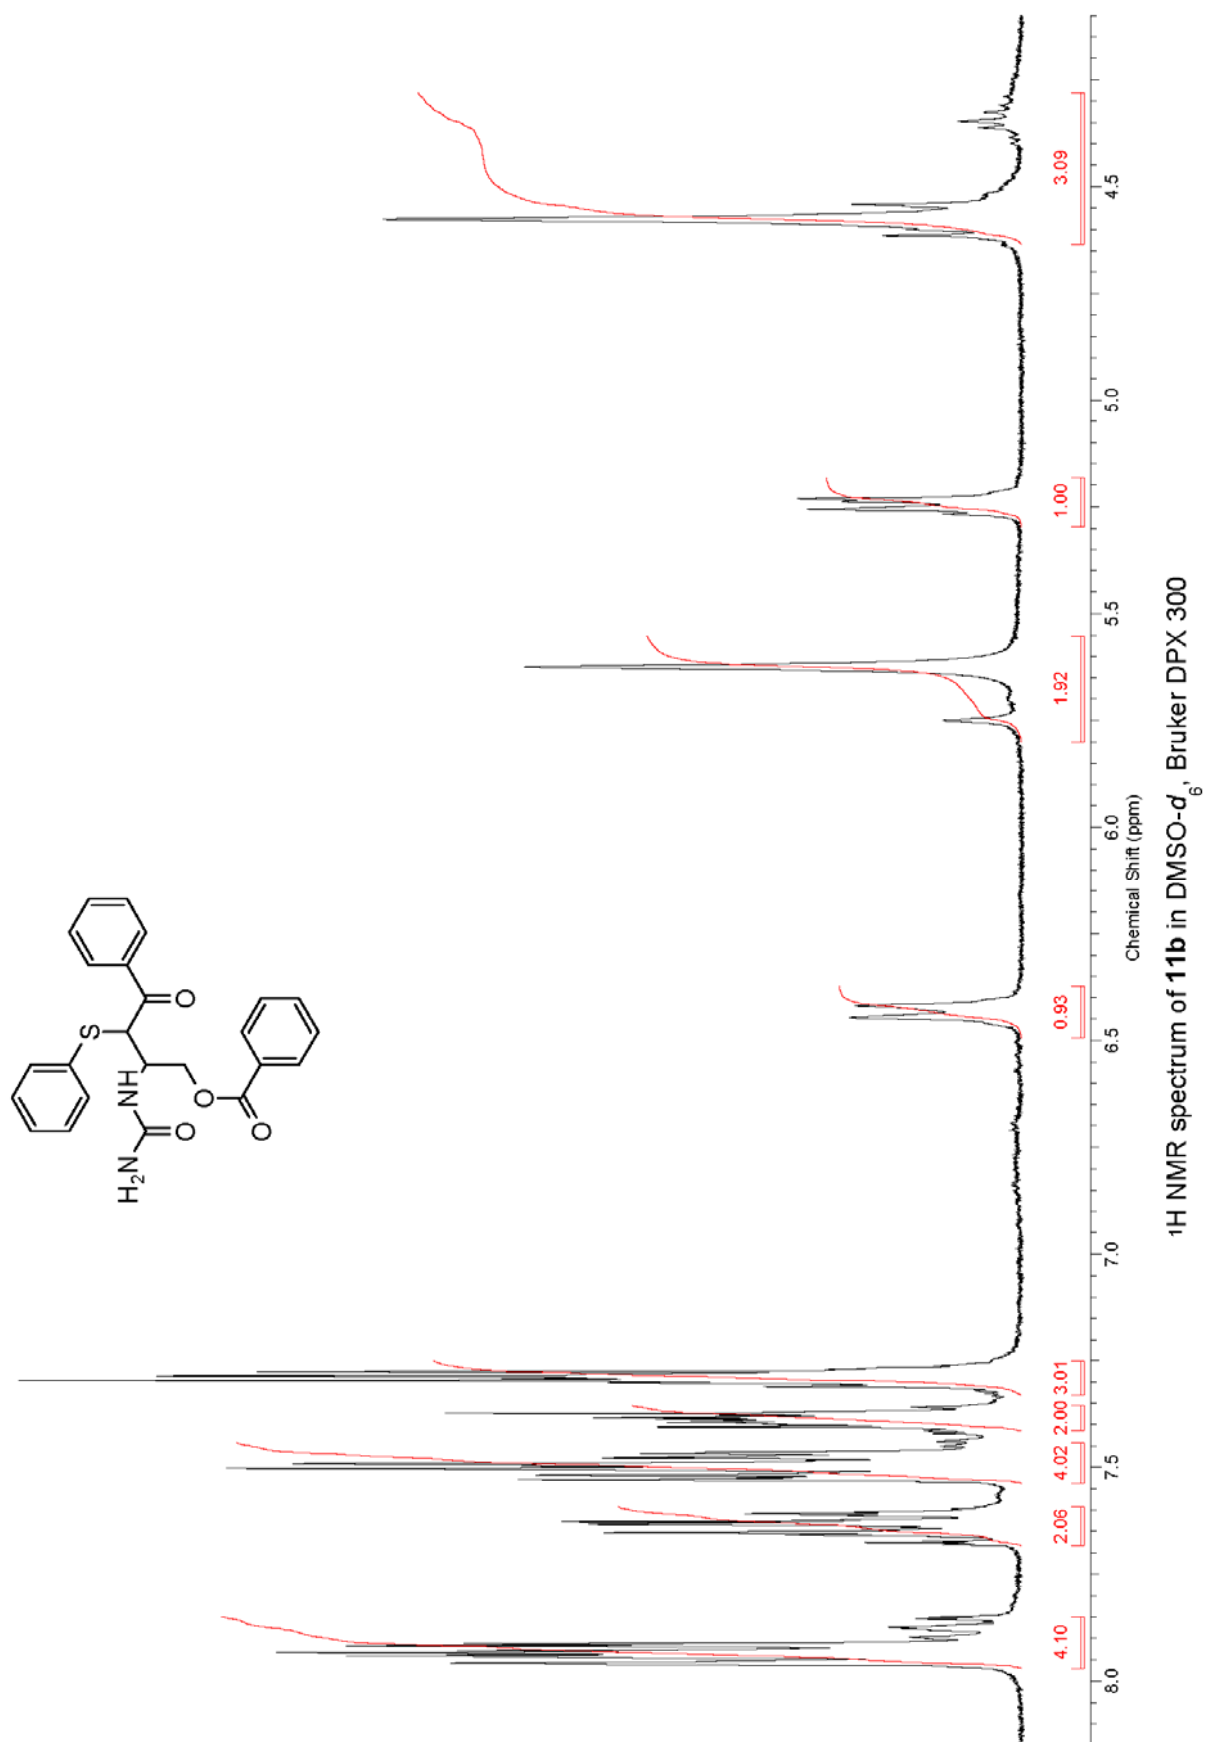

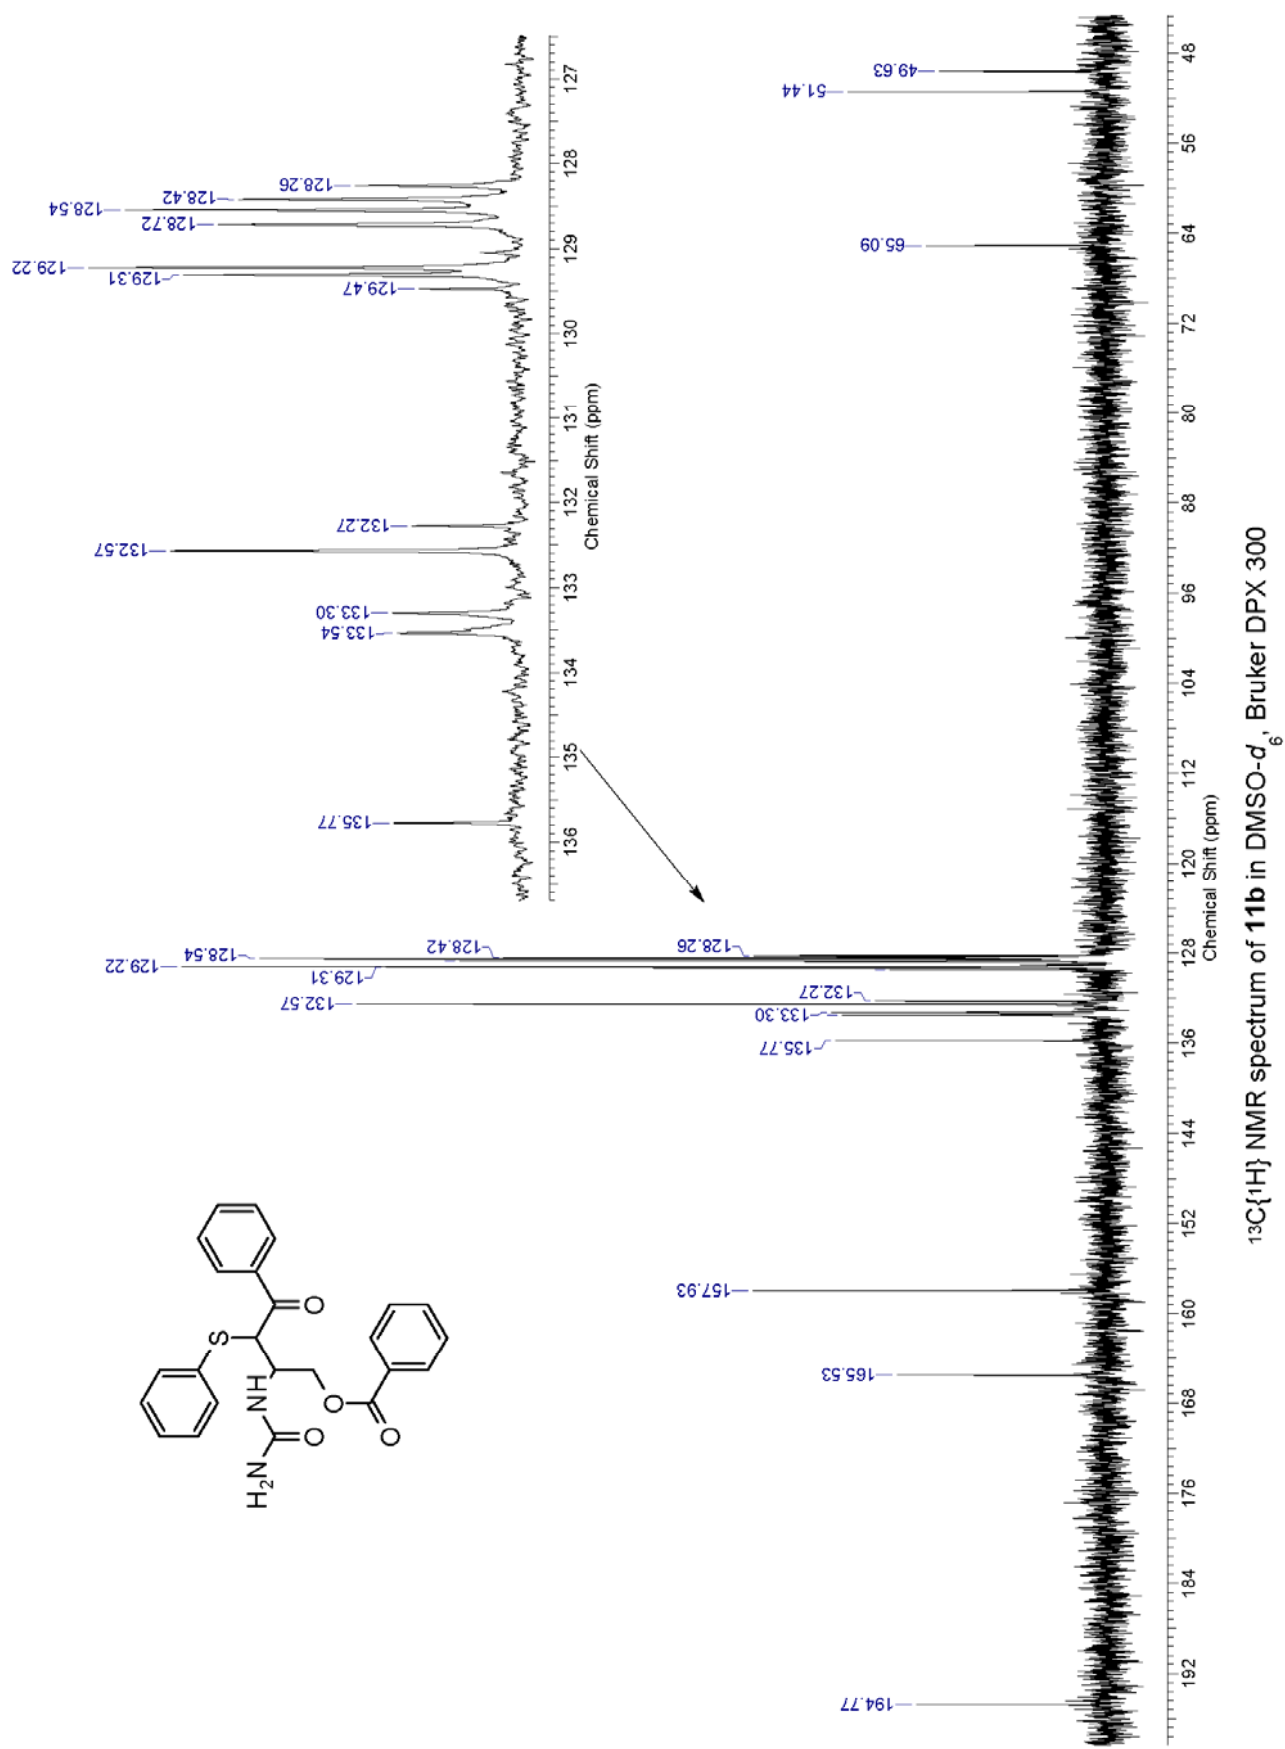

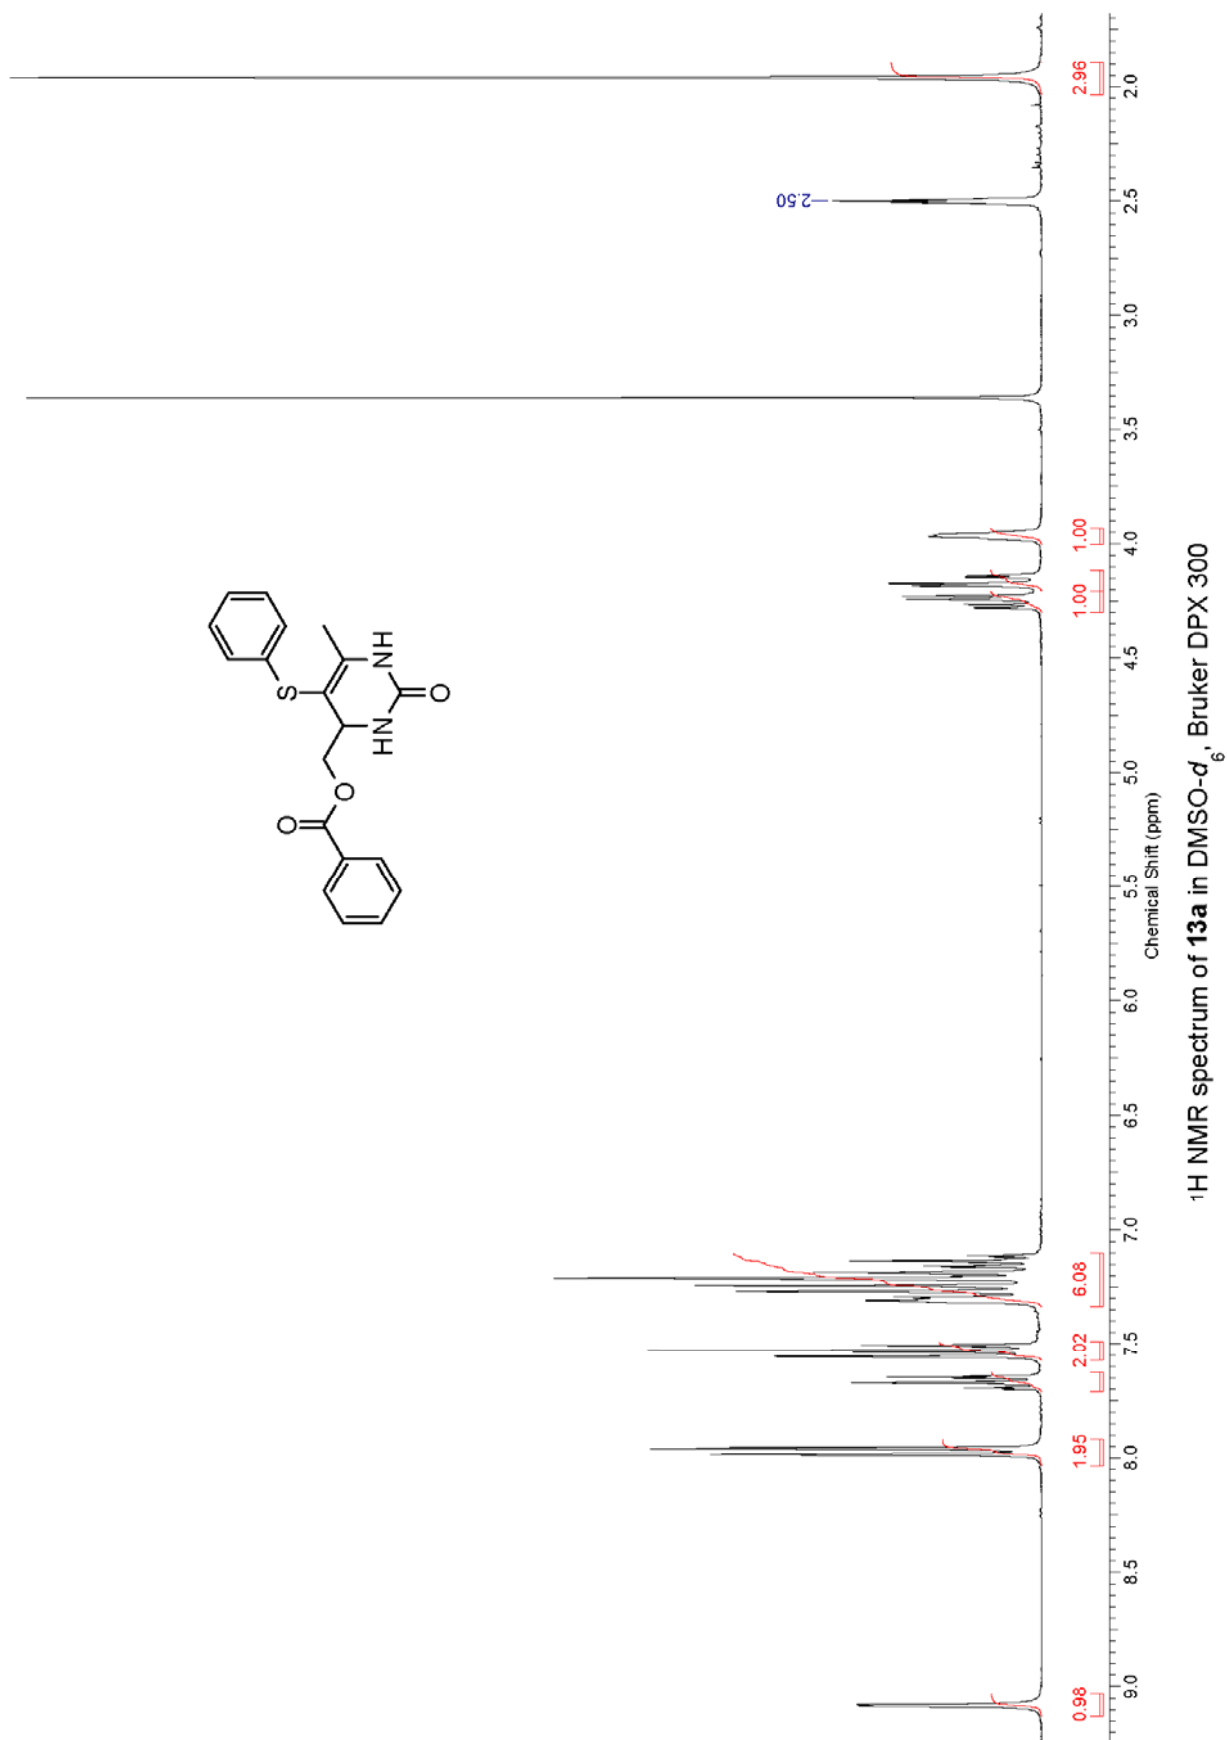

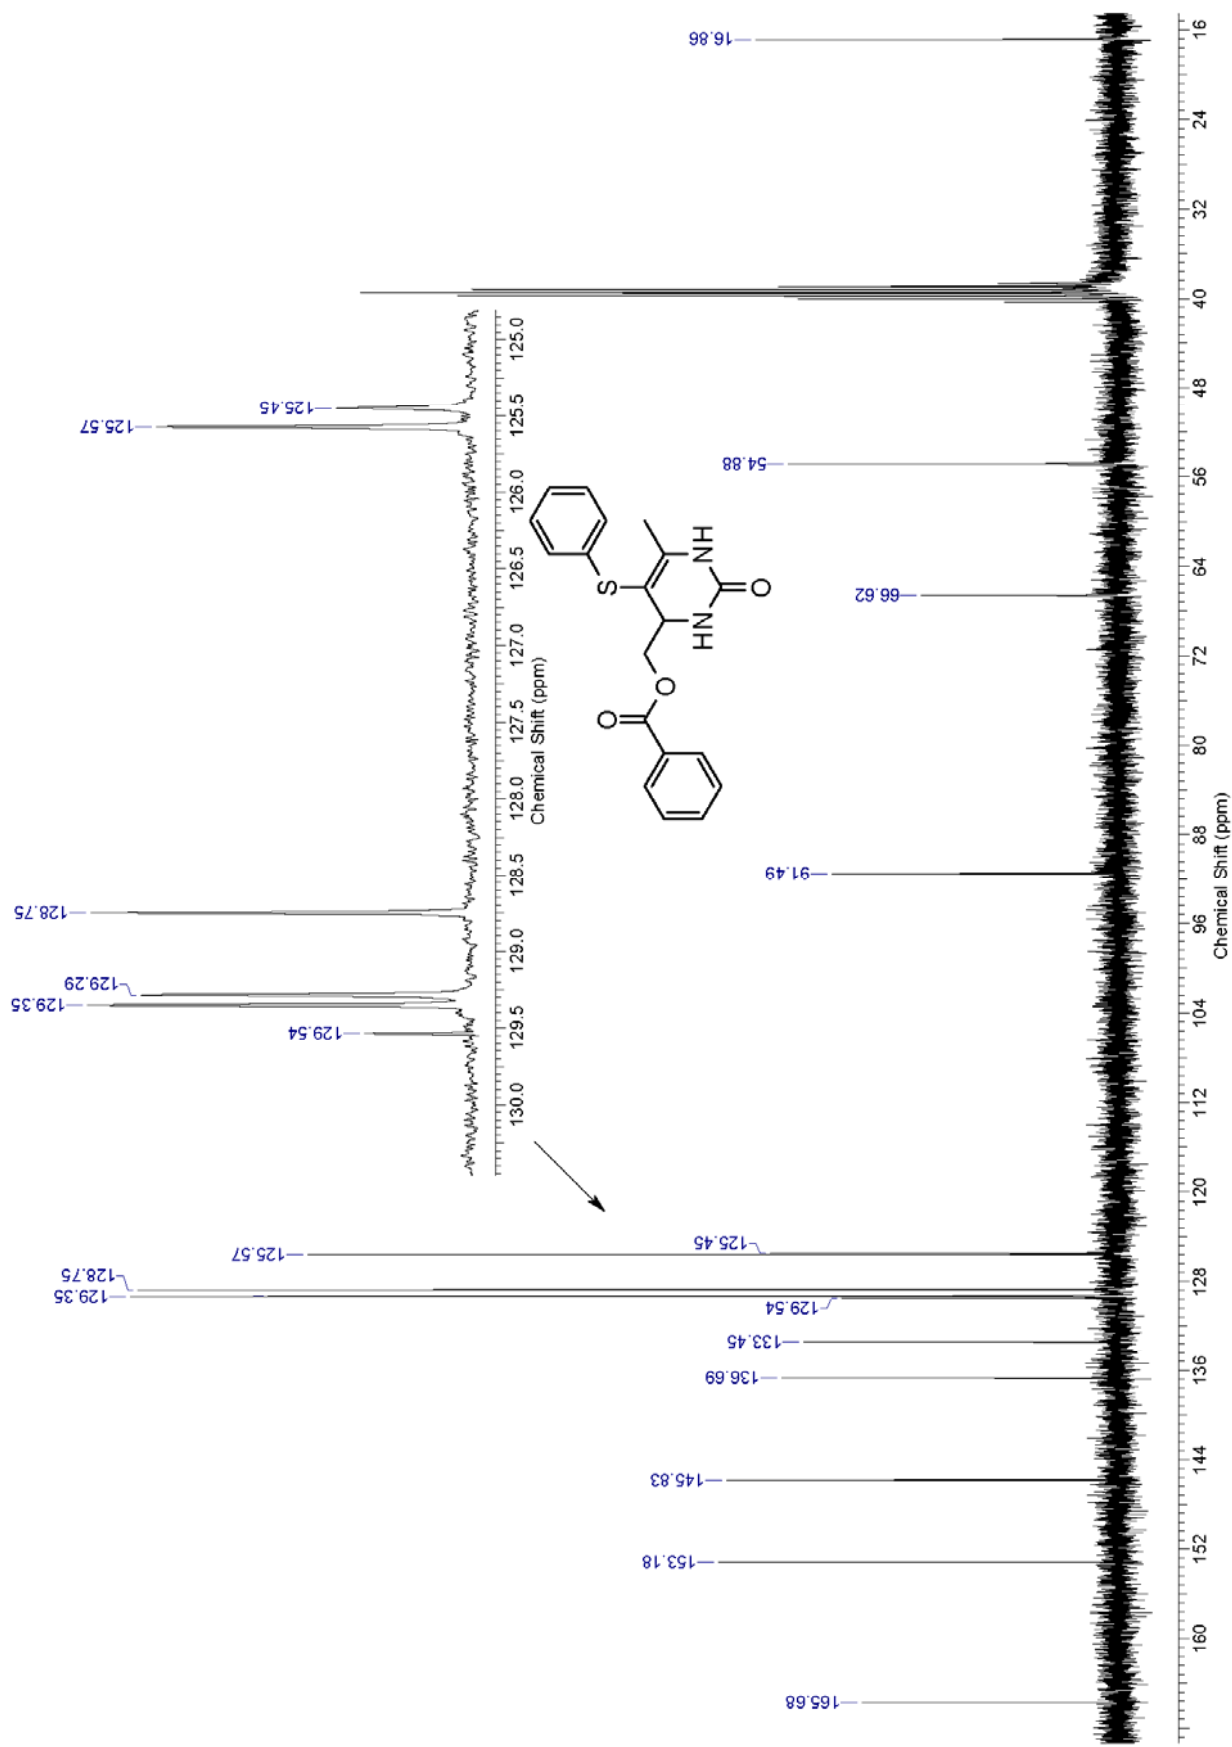

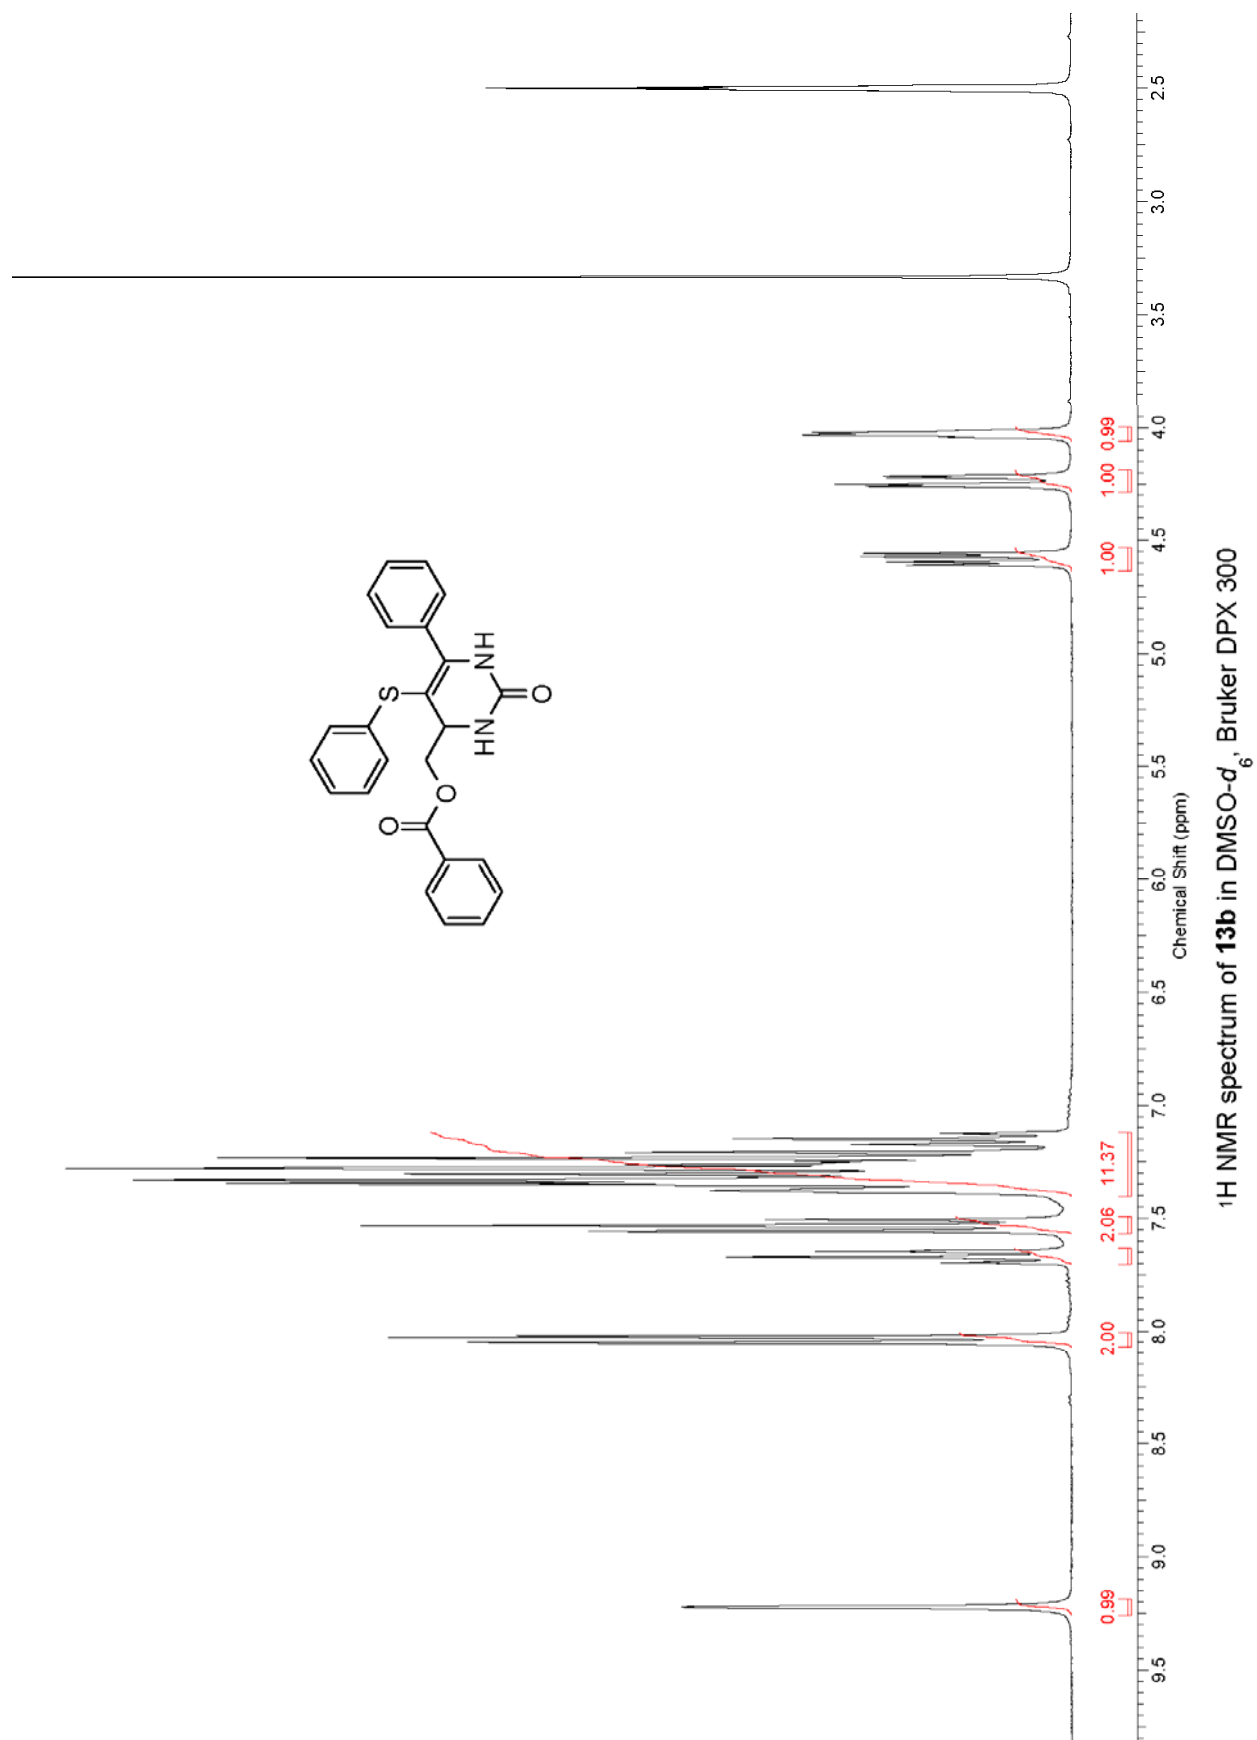

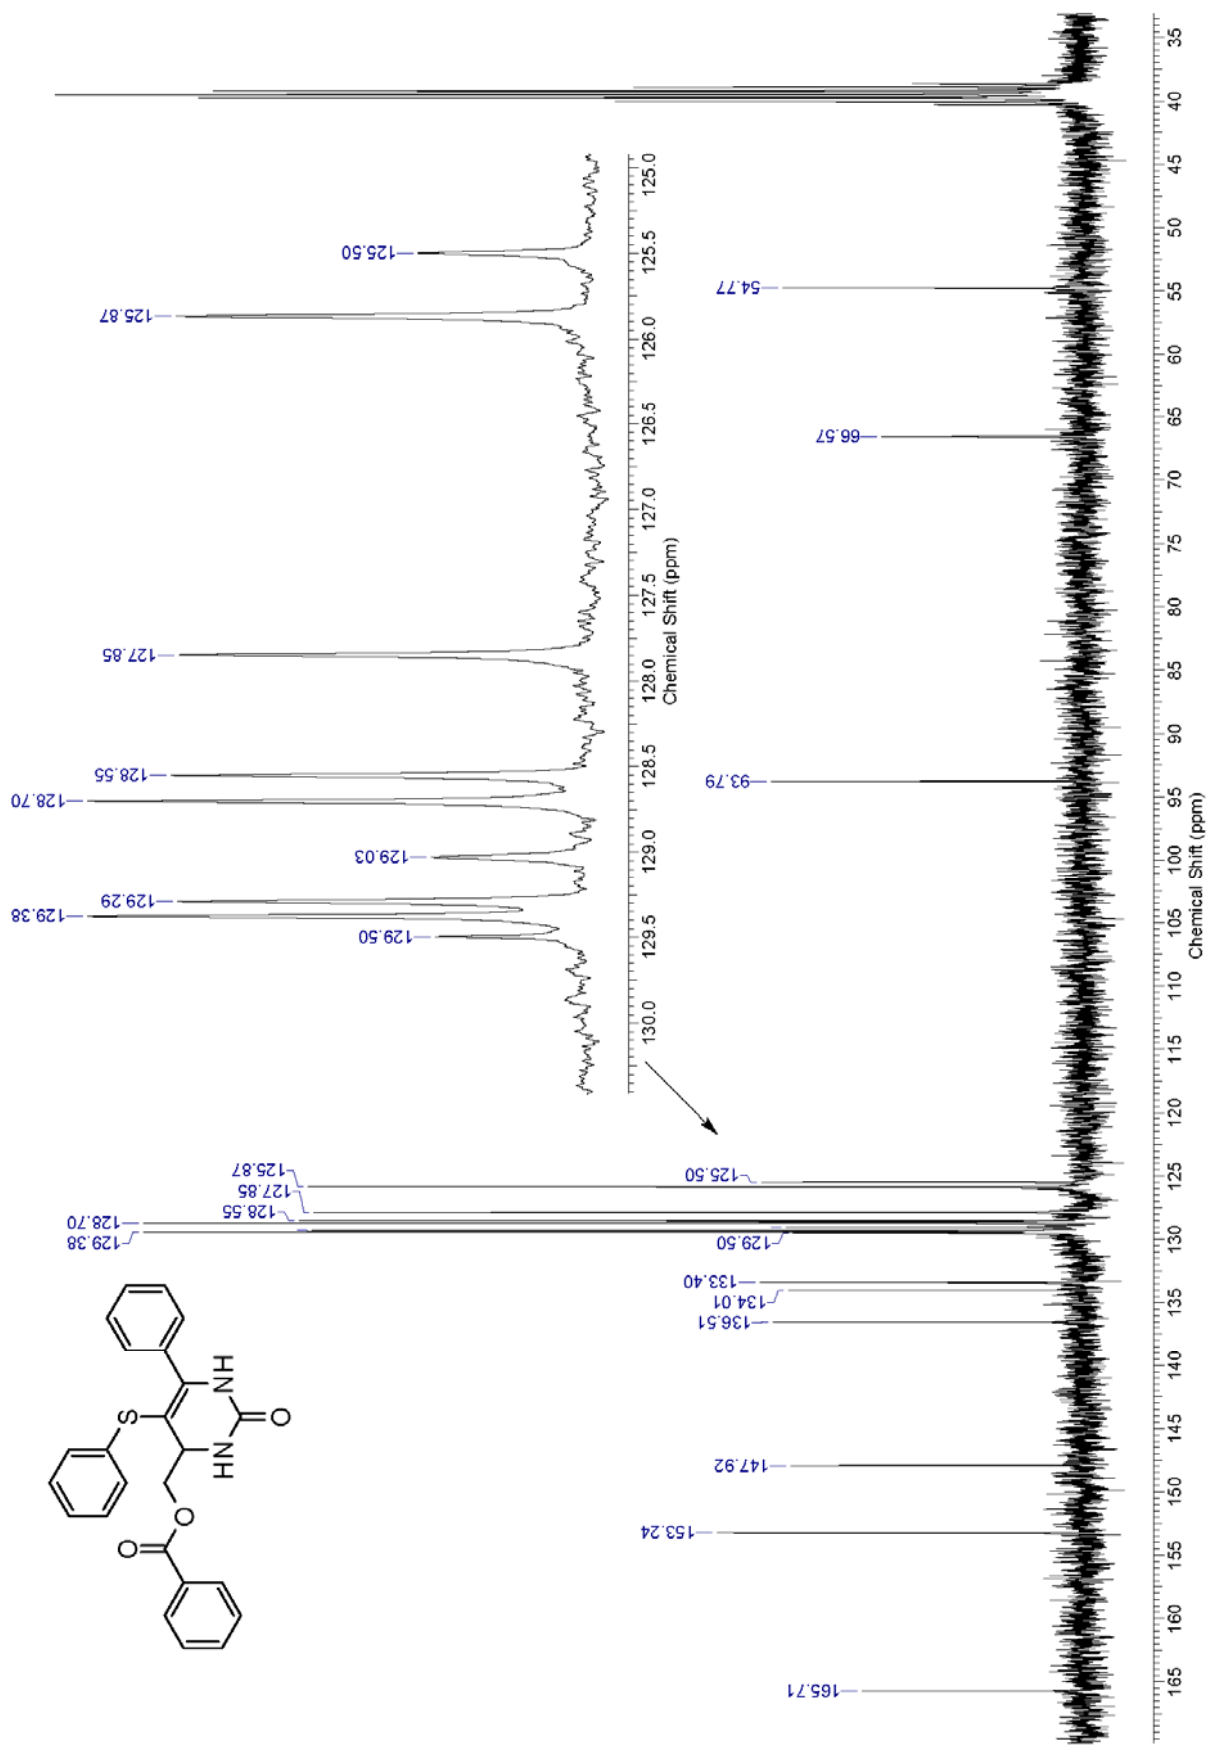

$^{13}\text{C}\{^1\text{H}\}$  NMR spectrum of **13b** in  $\text{DMSO-}d_6$ , Bruker DPX 300

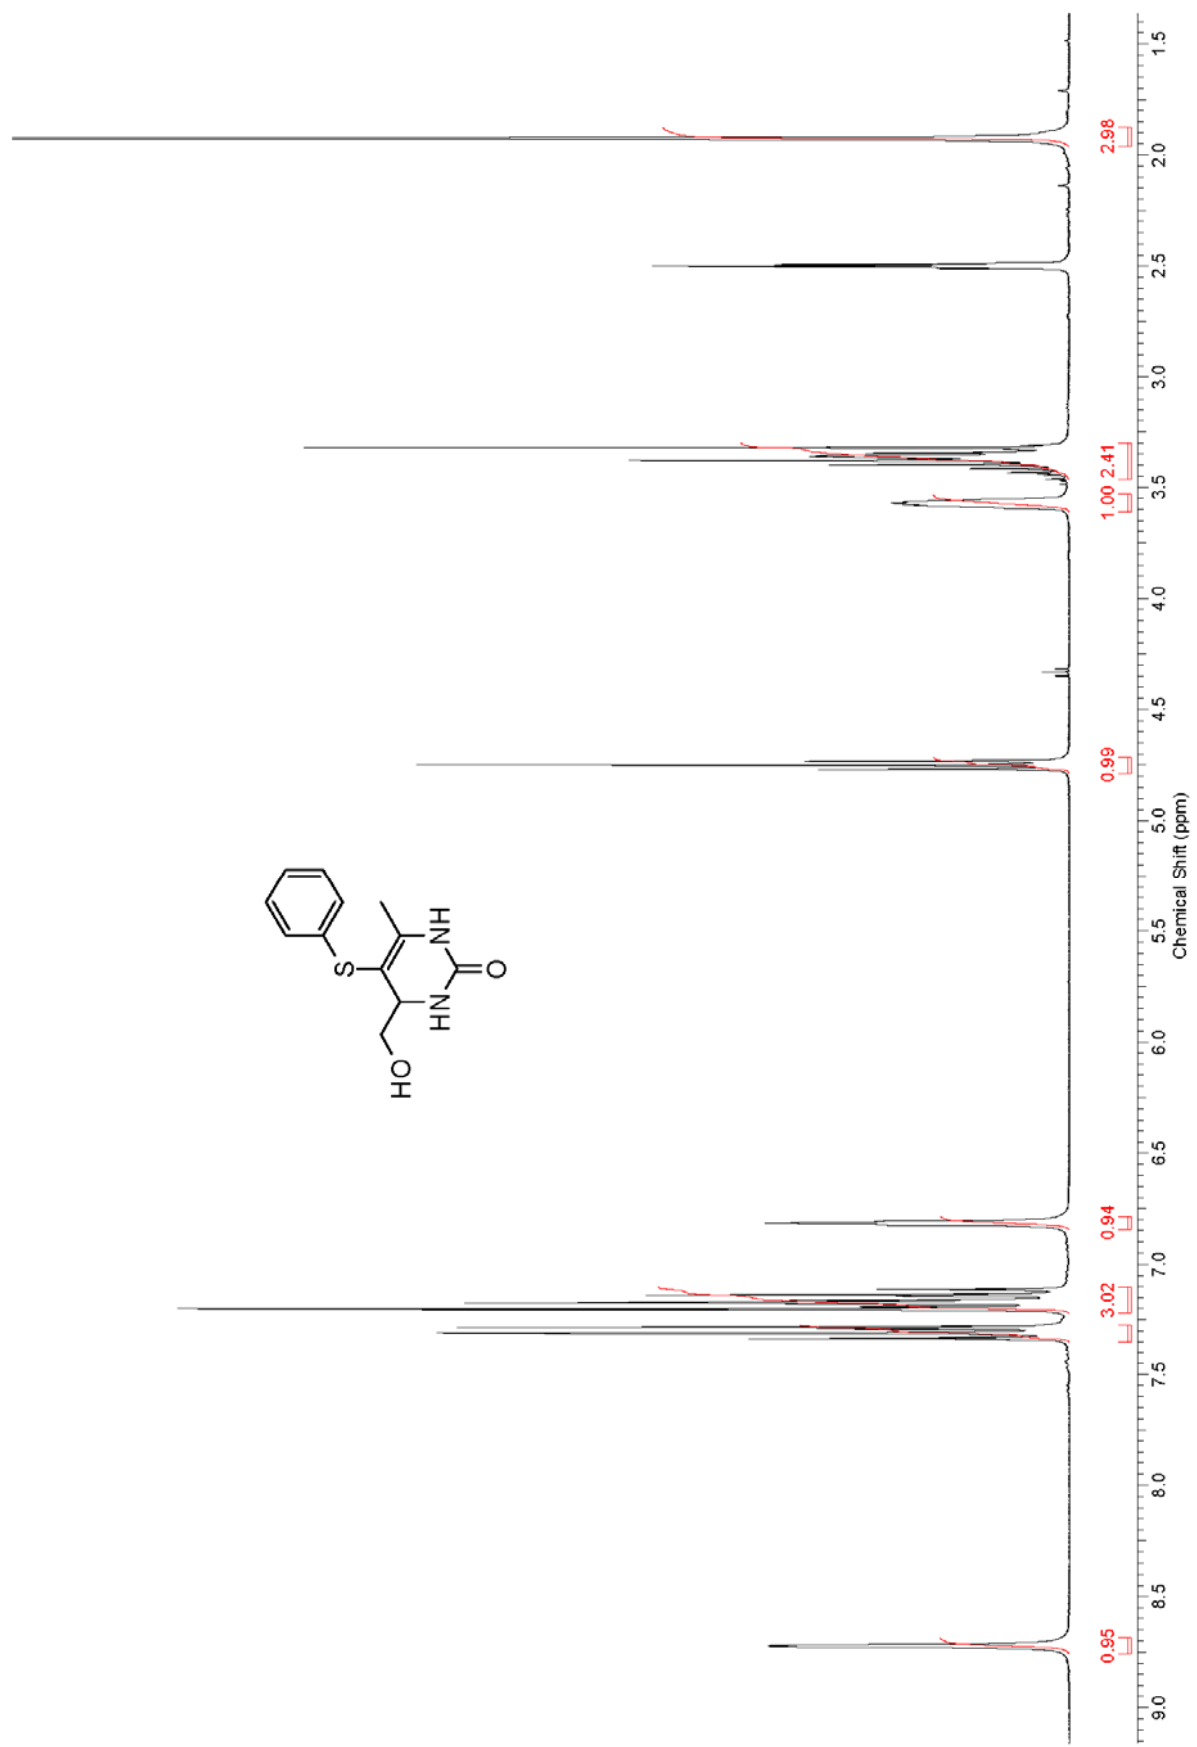

<sup>1</sup>H NMR spectrum of **14a** in DMSO-d<sub>6</sub>, Bruker DPX 300



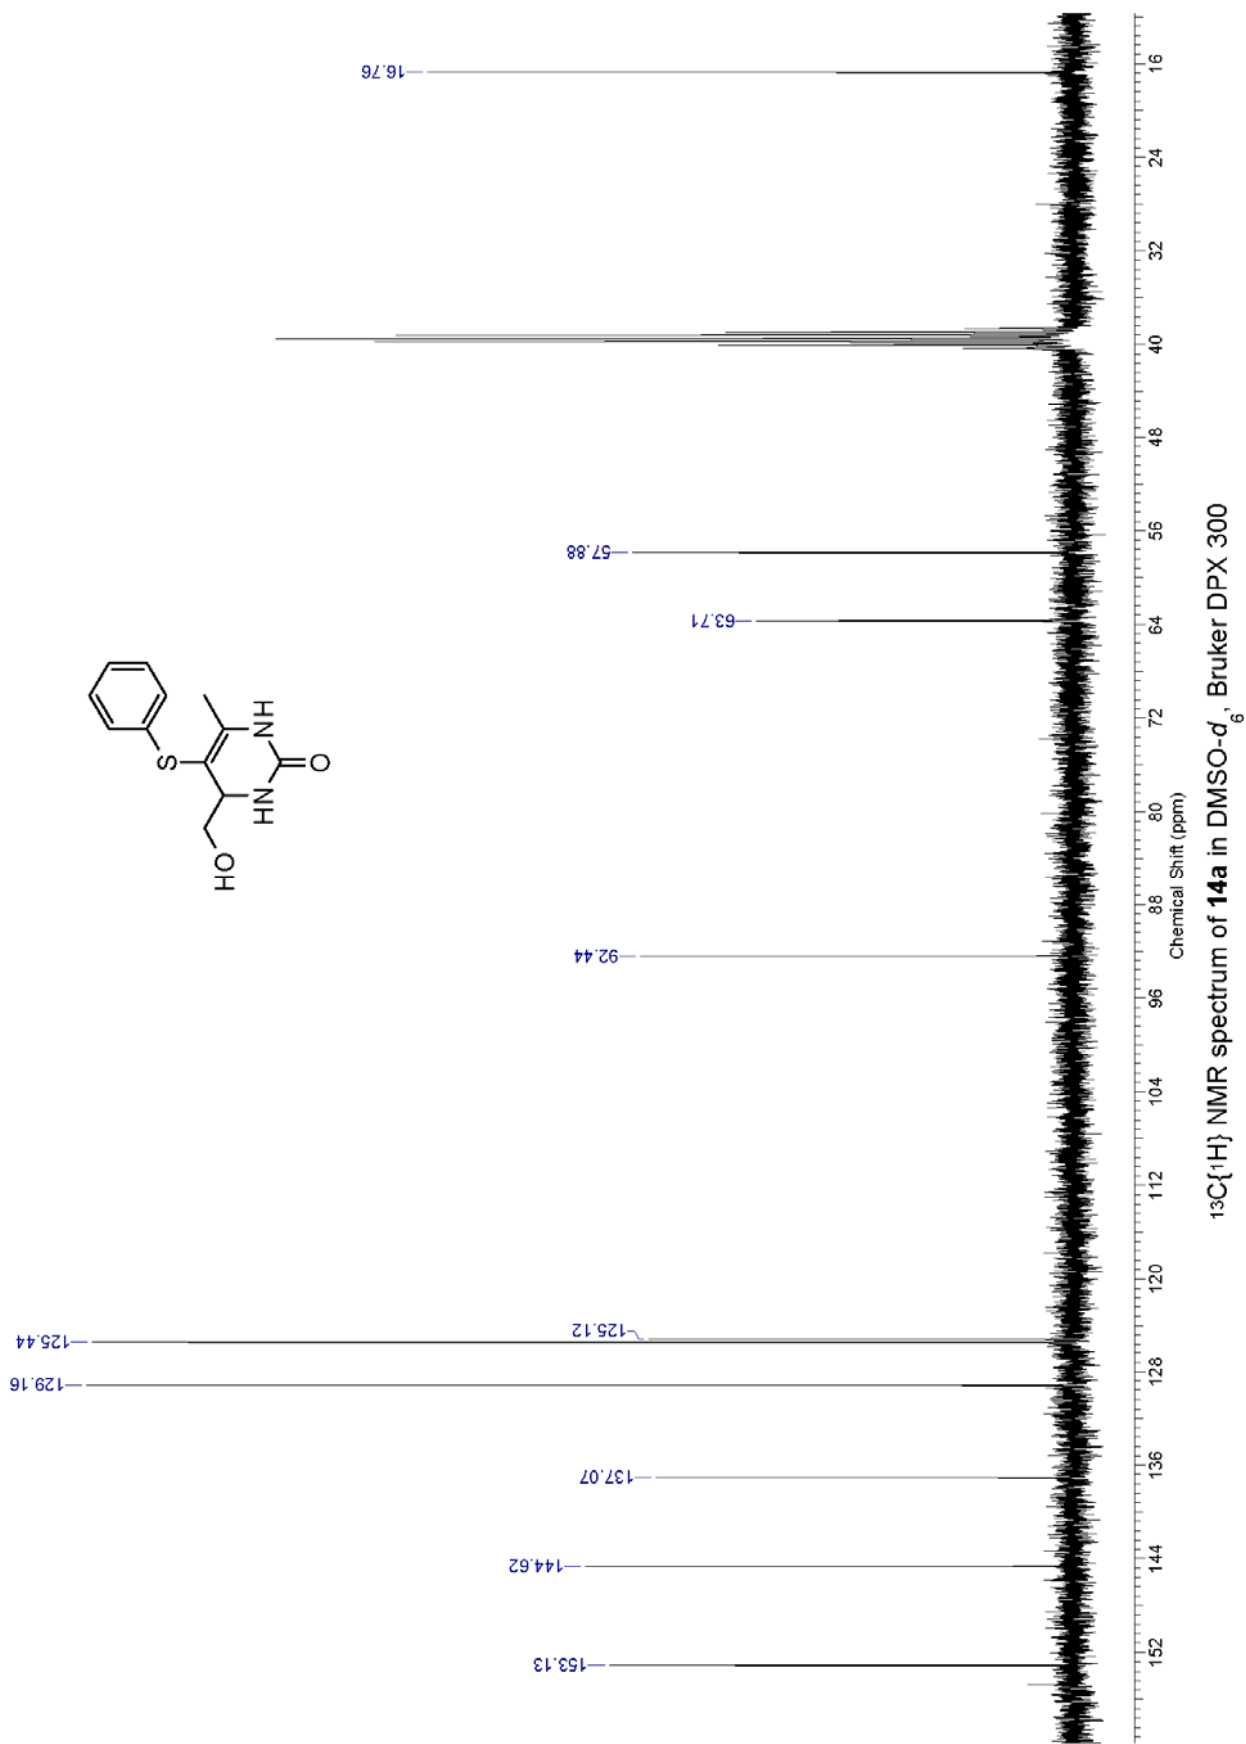

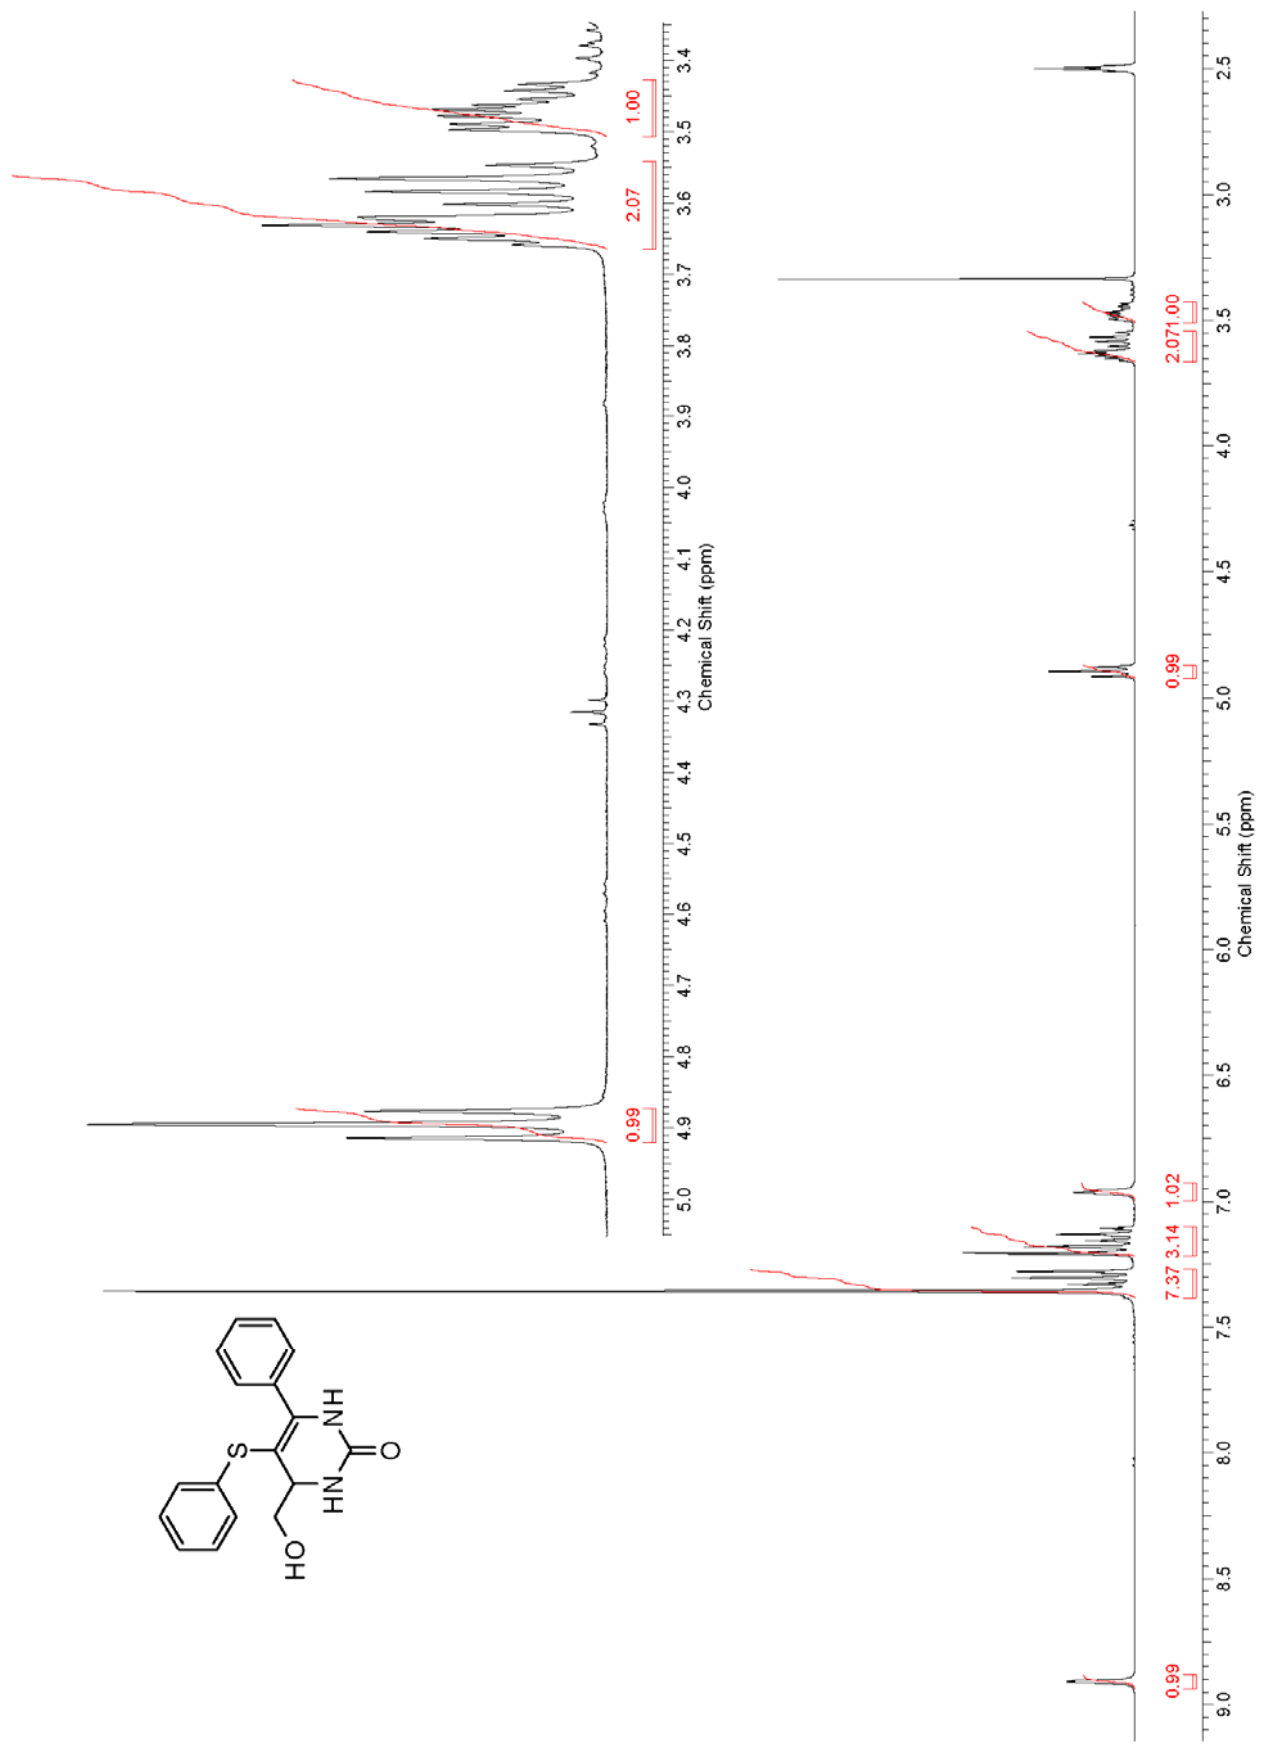

<sup>1</sup>H NMR spectrum of **14b** in DMSO-d<sub>6</sub>, Bruker DPX 300

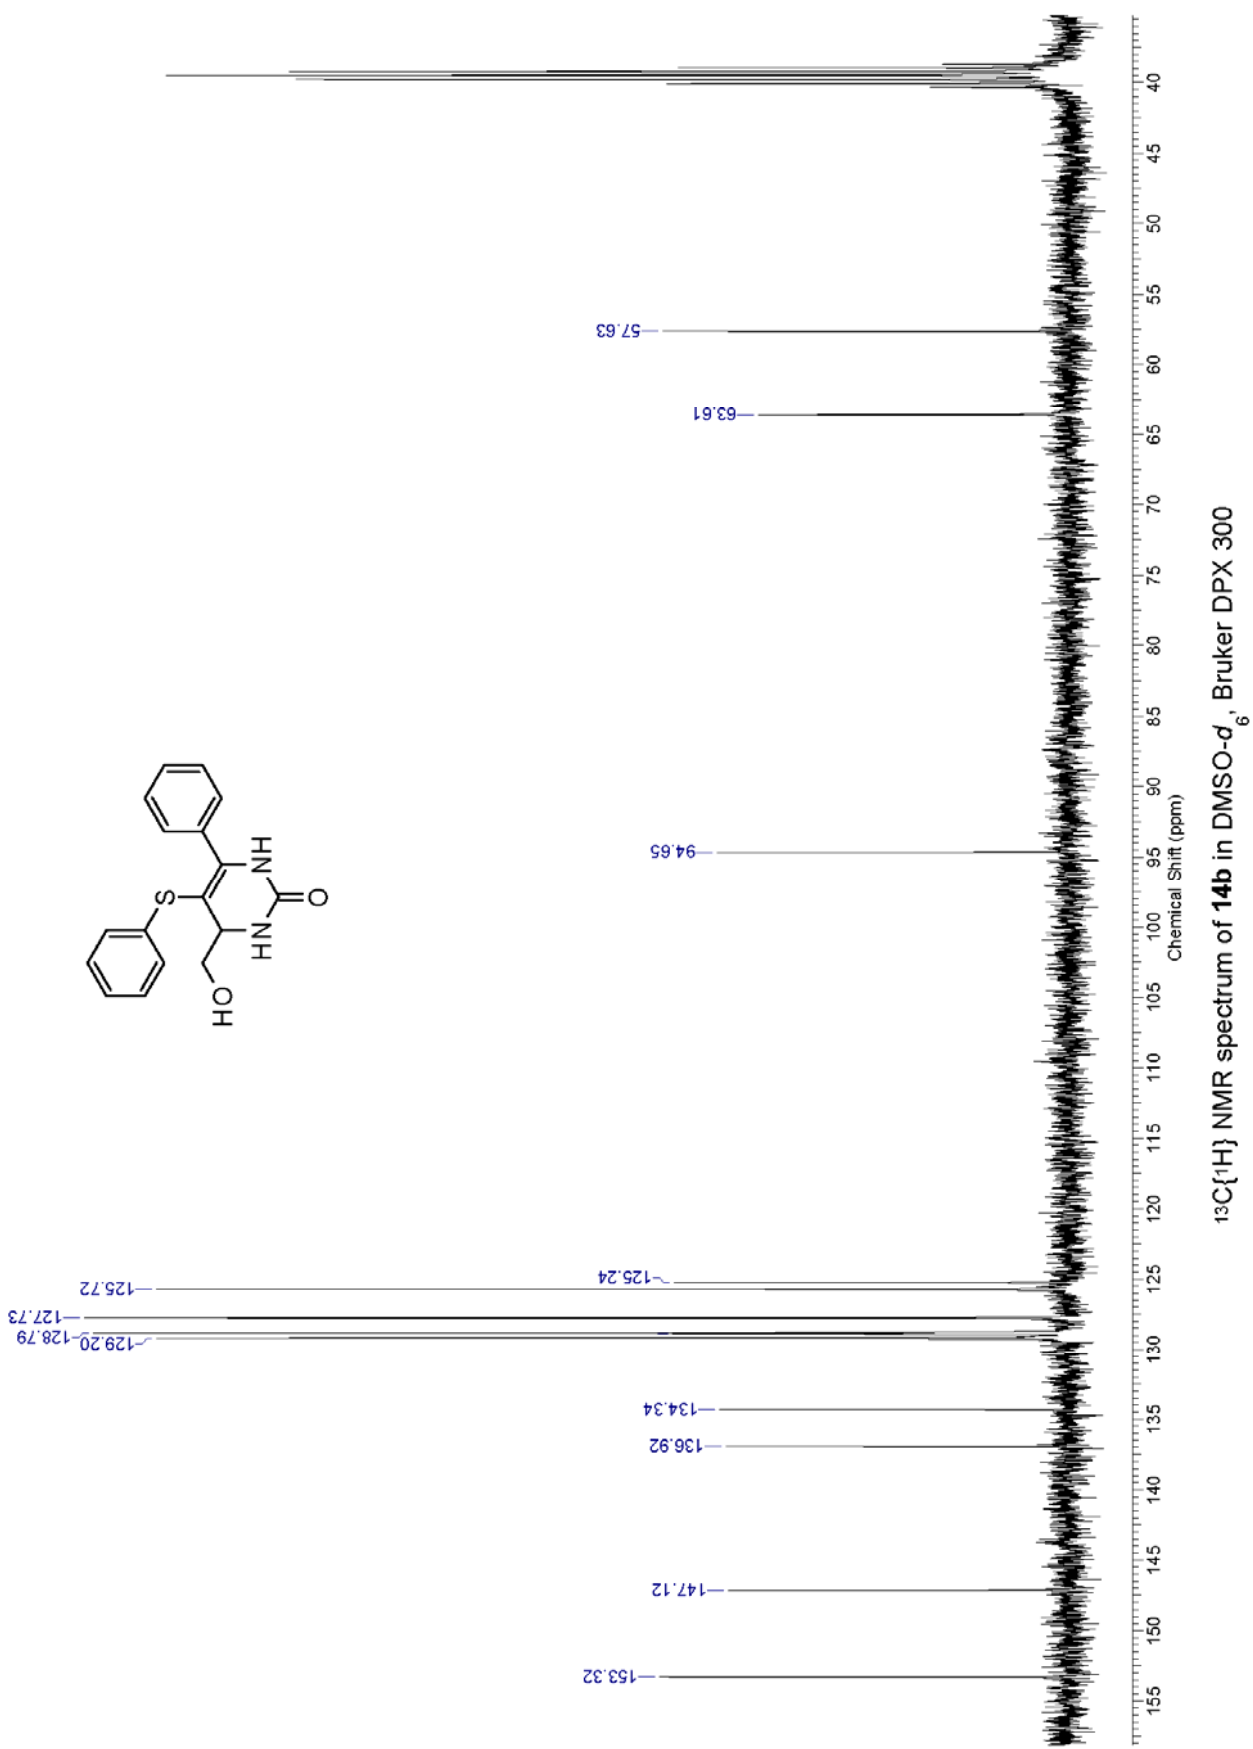

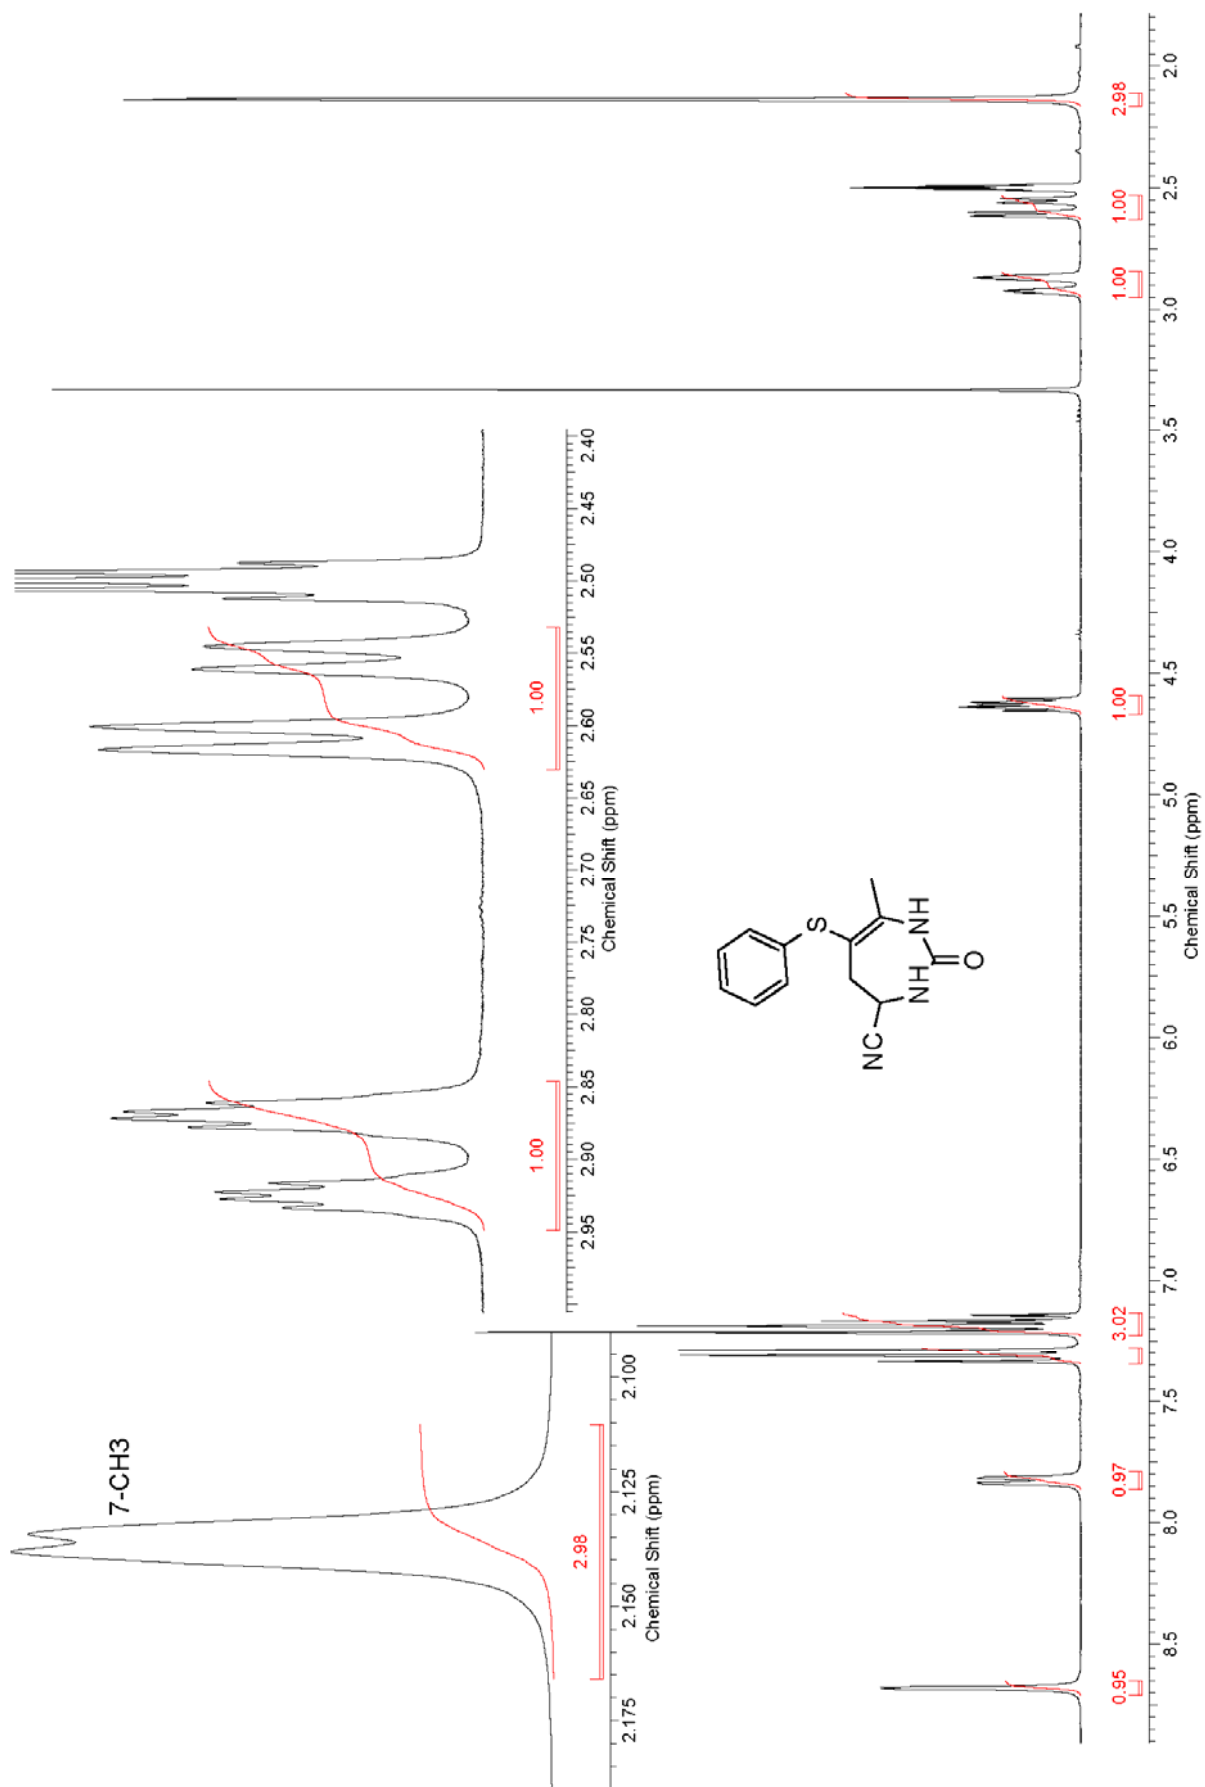

$^1\text{H}$  NMR spectrum of 15a in  $\text{DMSO}-d_6$ , Bruker DPX 300

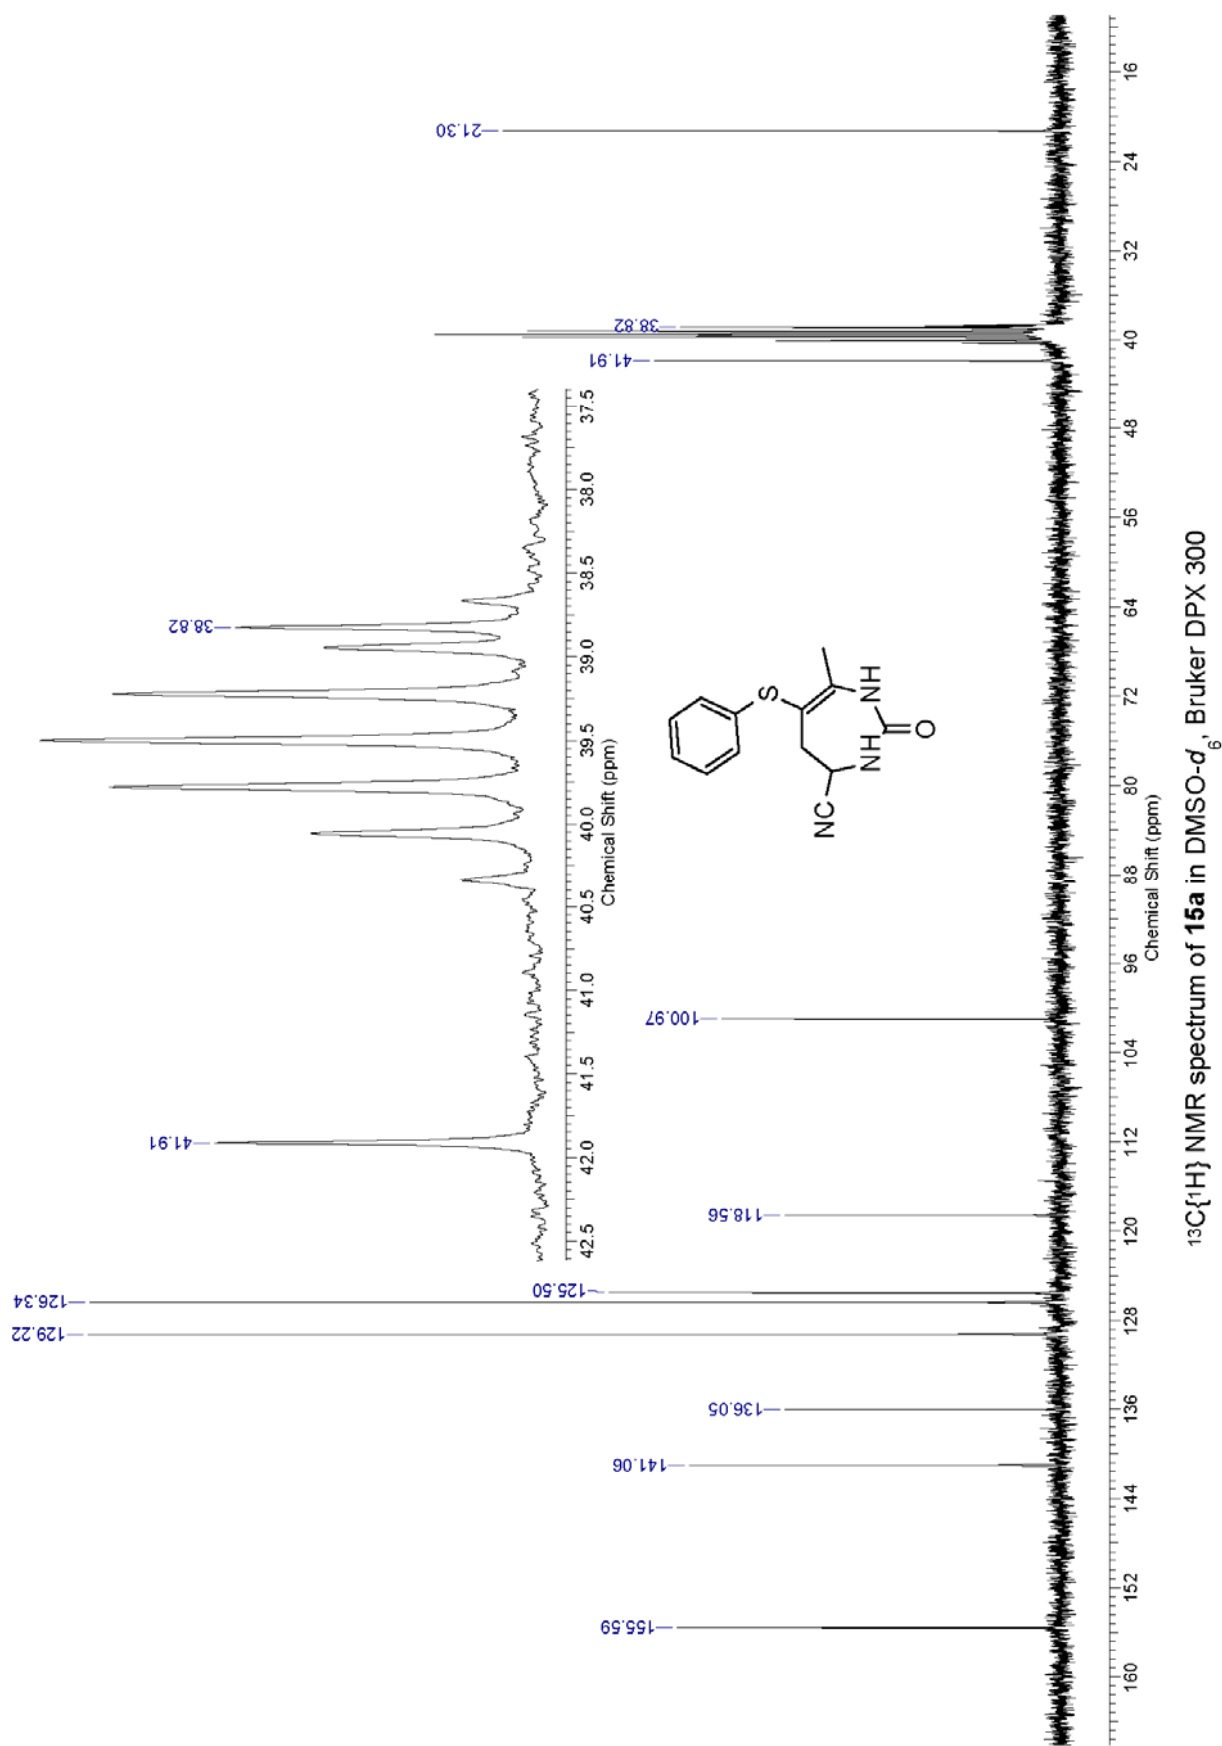

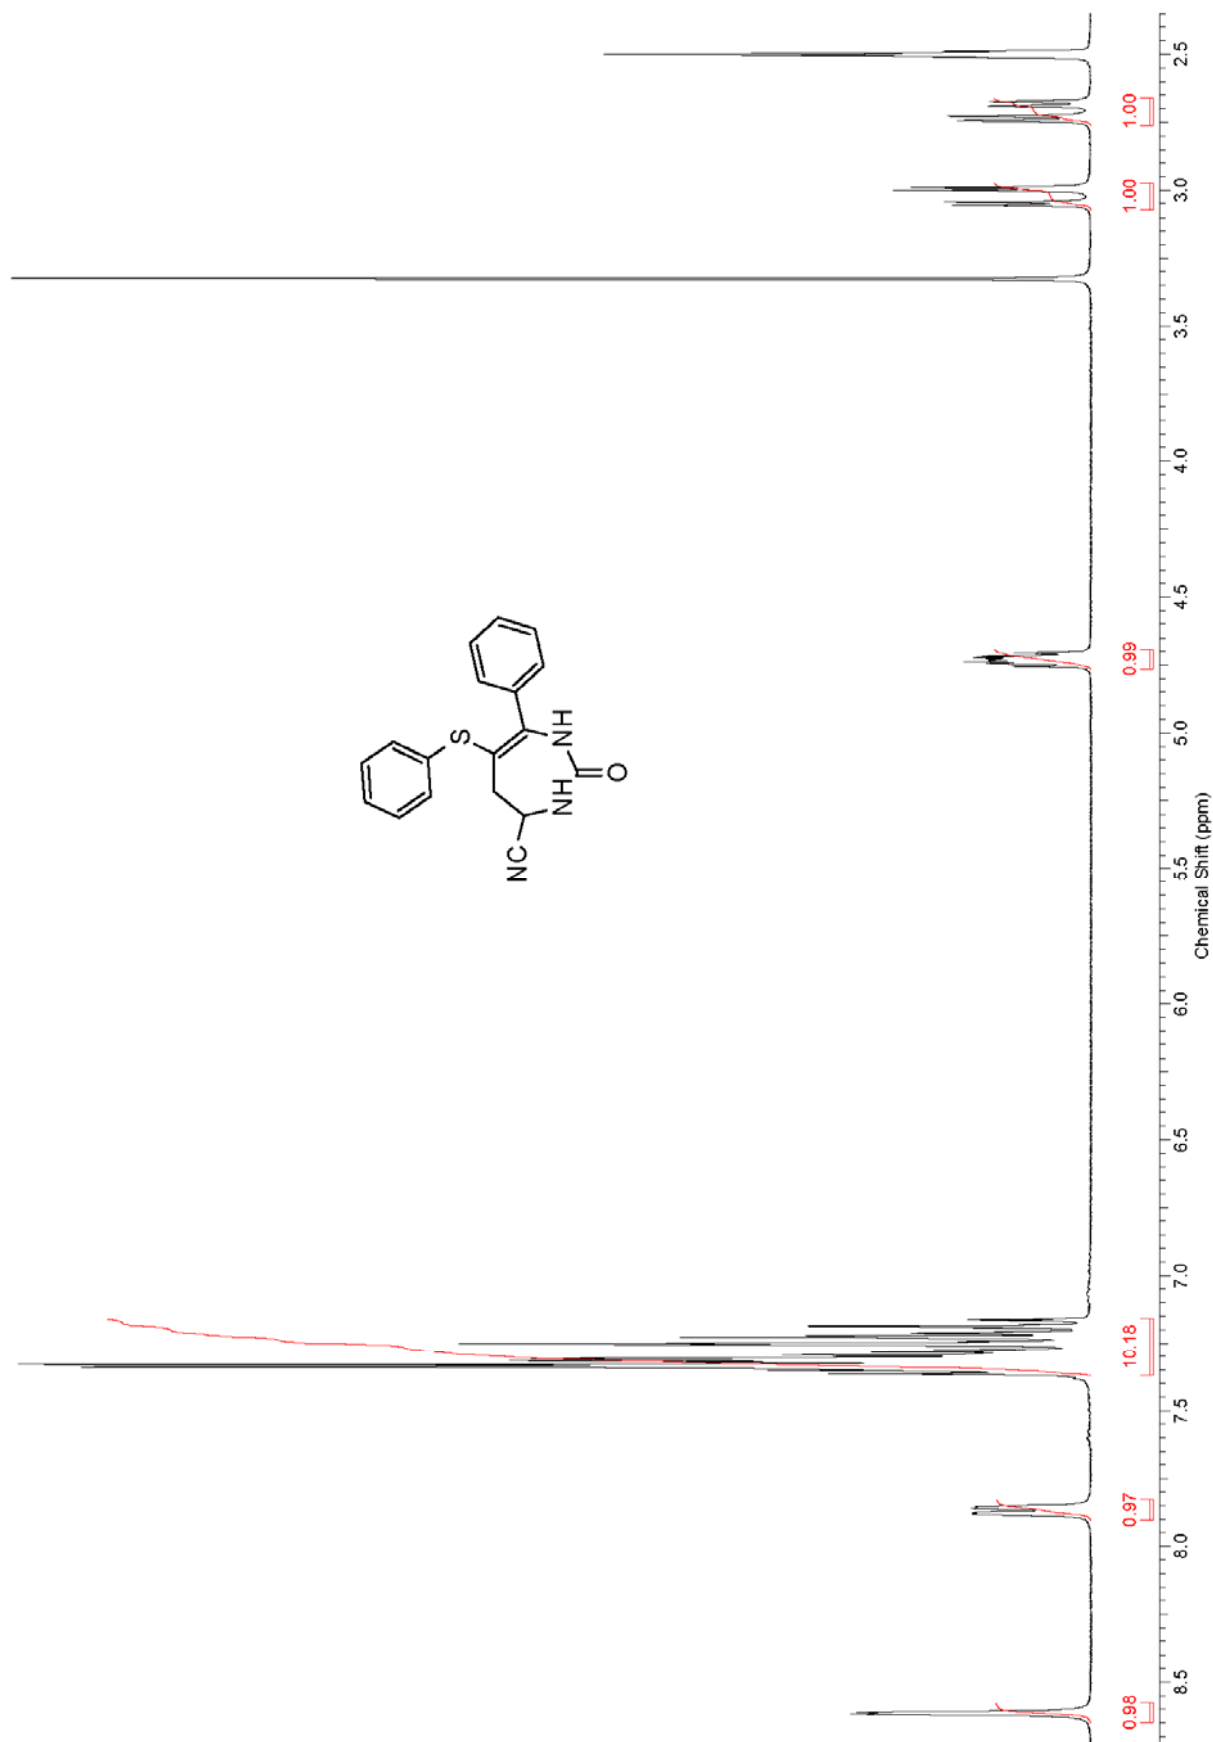

<sup>1</sup>H NMR spectrum of **15b** in DMSO-d<sub>6</sub>, Bruker DPX 300

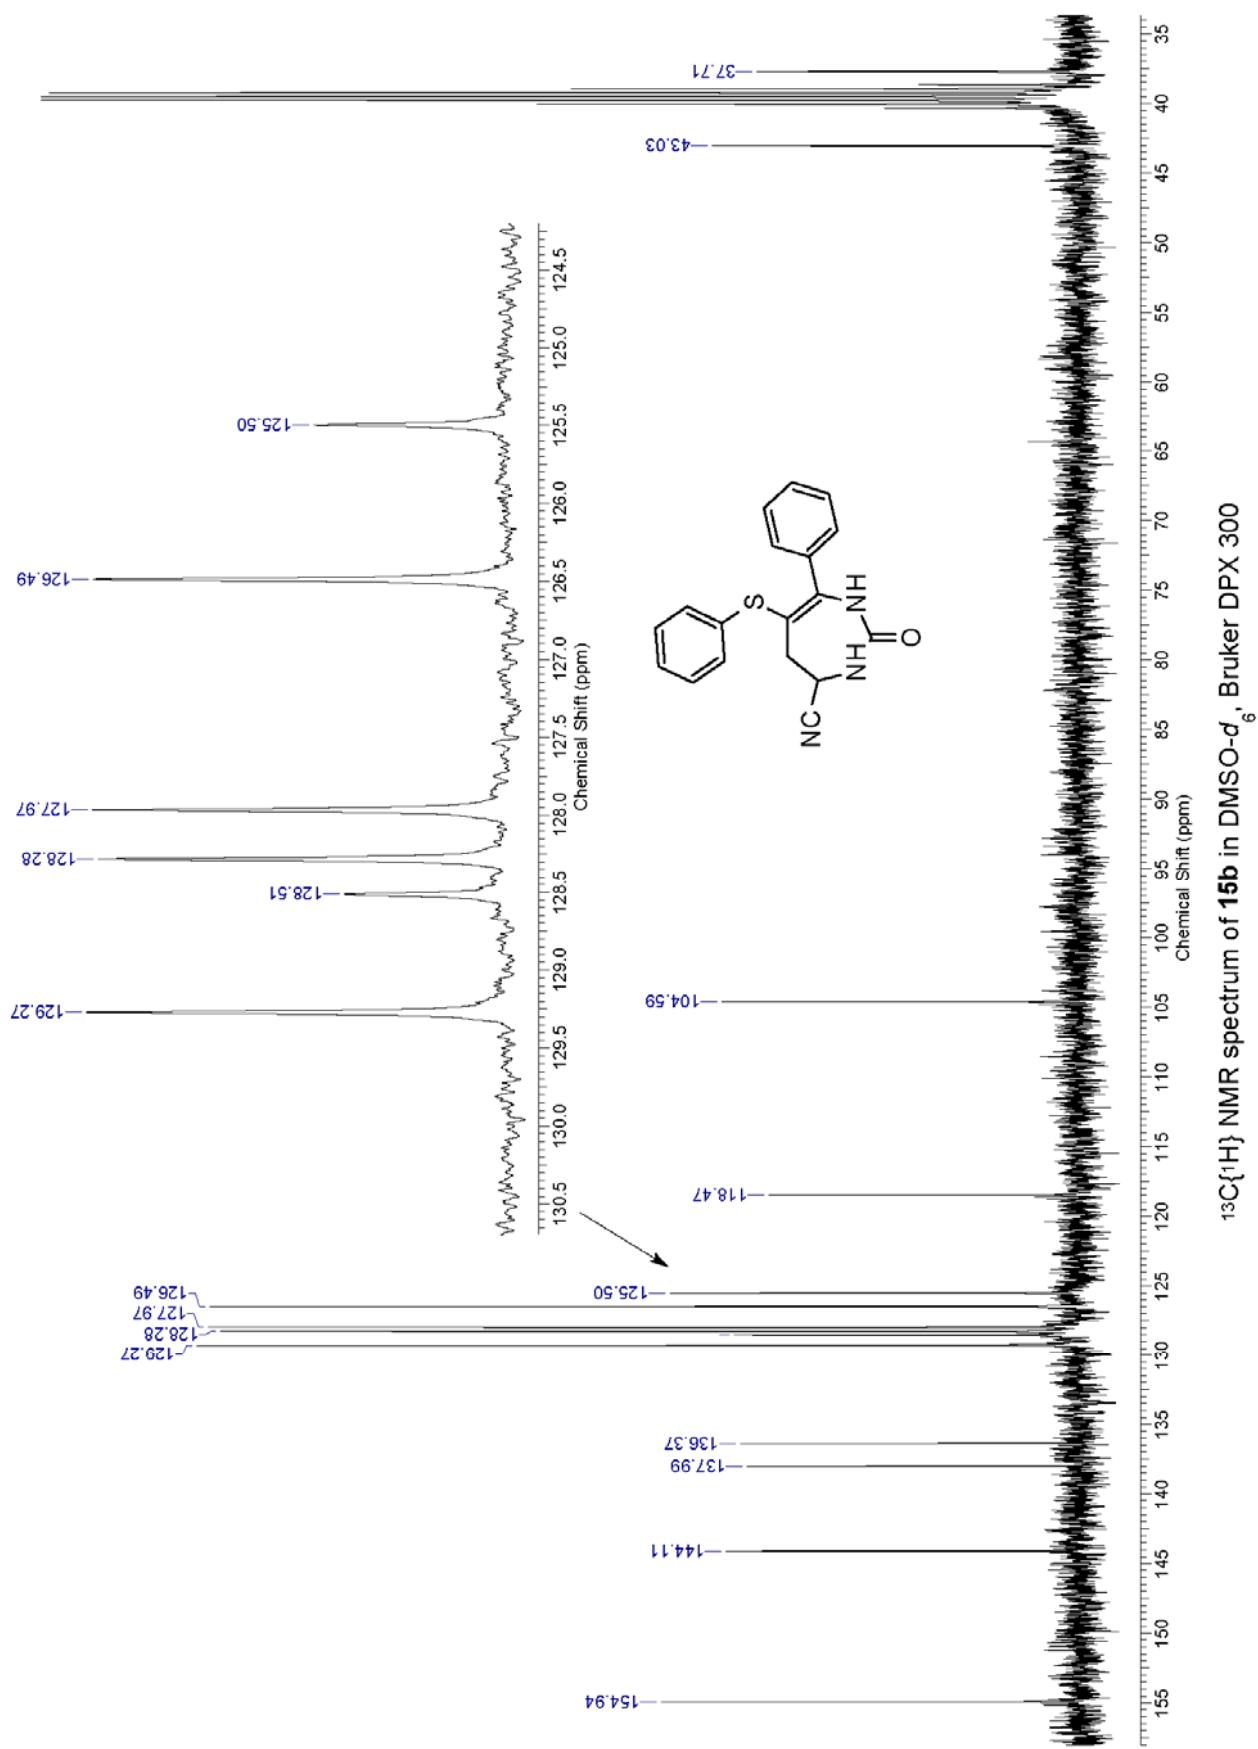

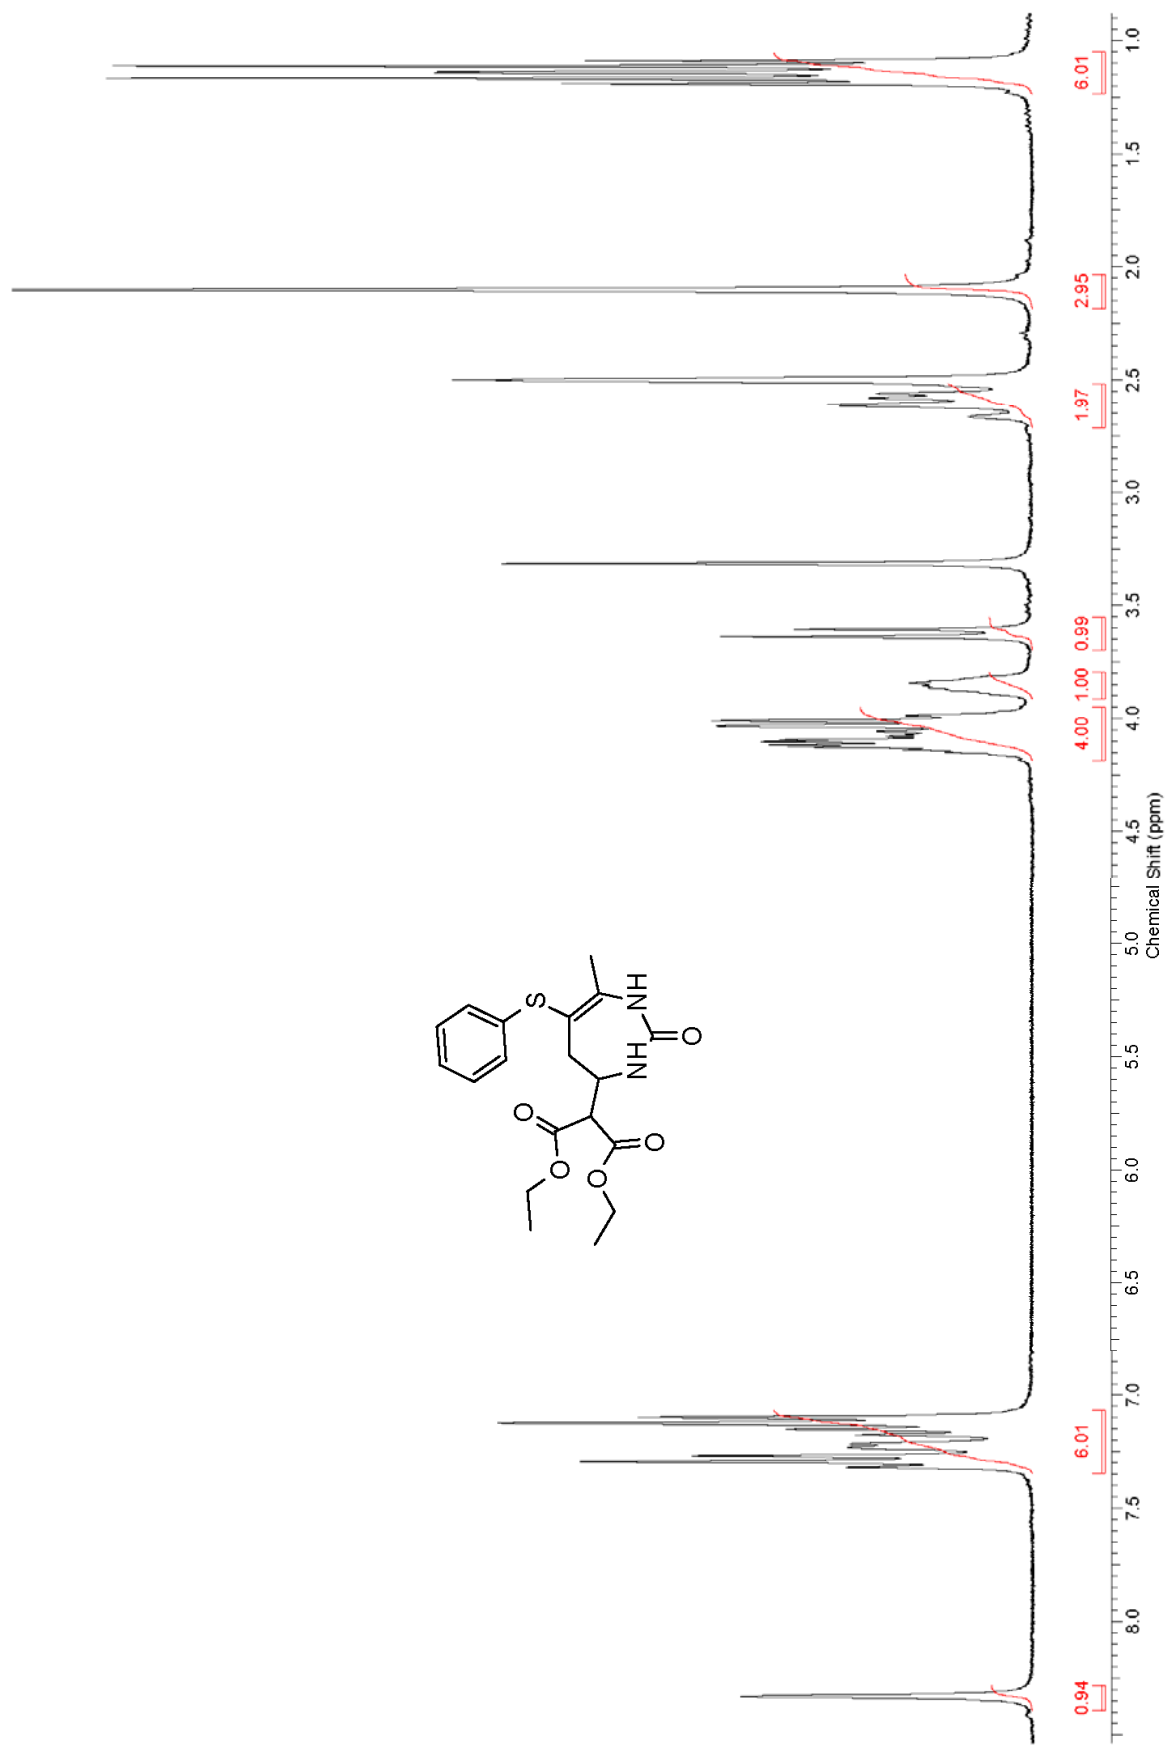

<sup>1</sup>H NMR spectrum of **16a** in DMSO-*d*<sub>6</sub>, Bruker DPX 300



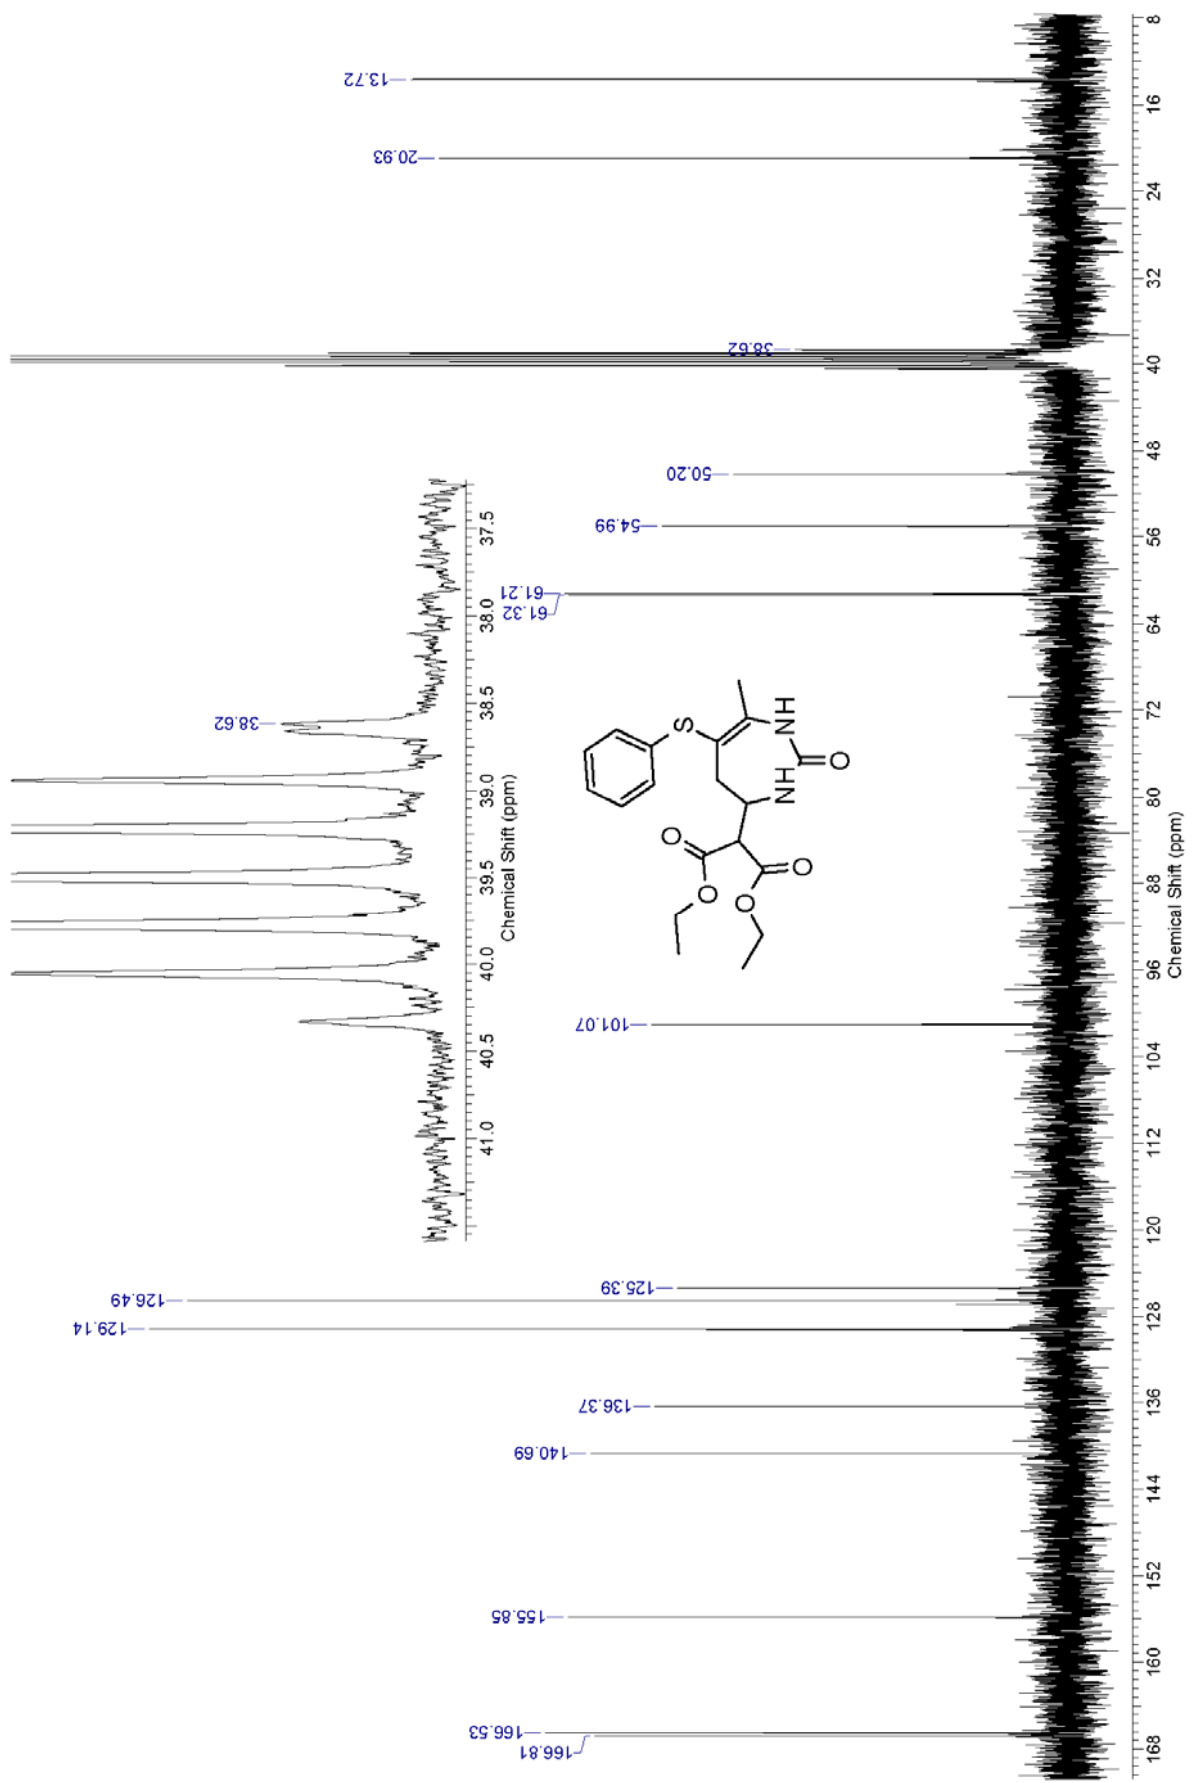

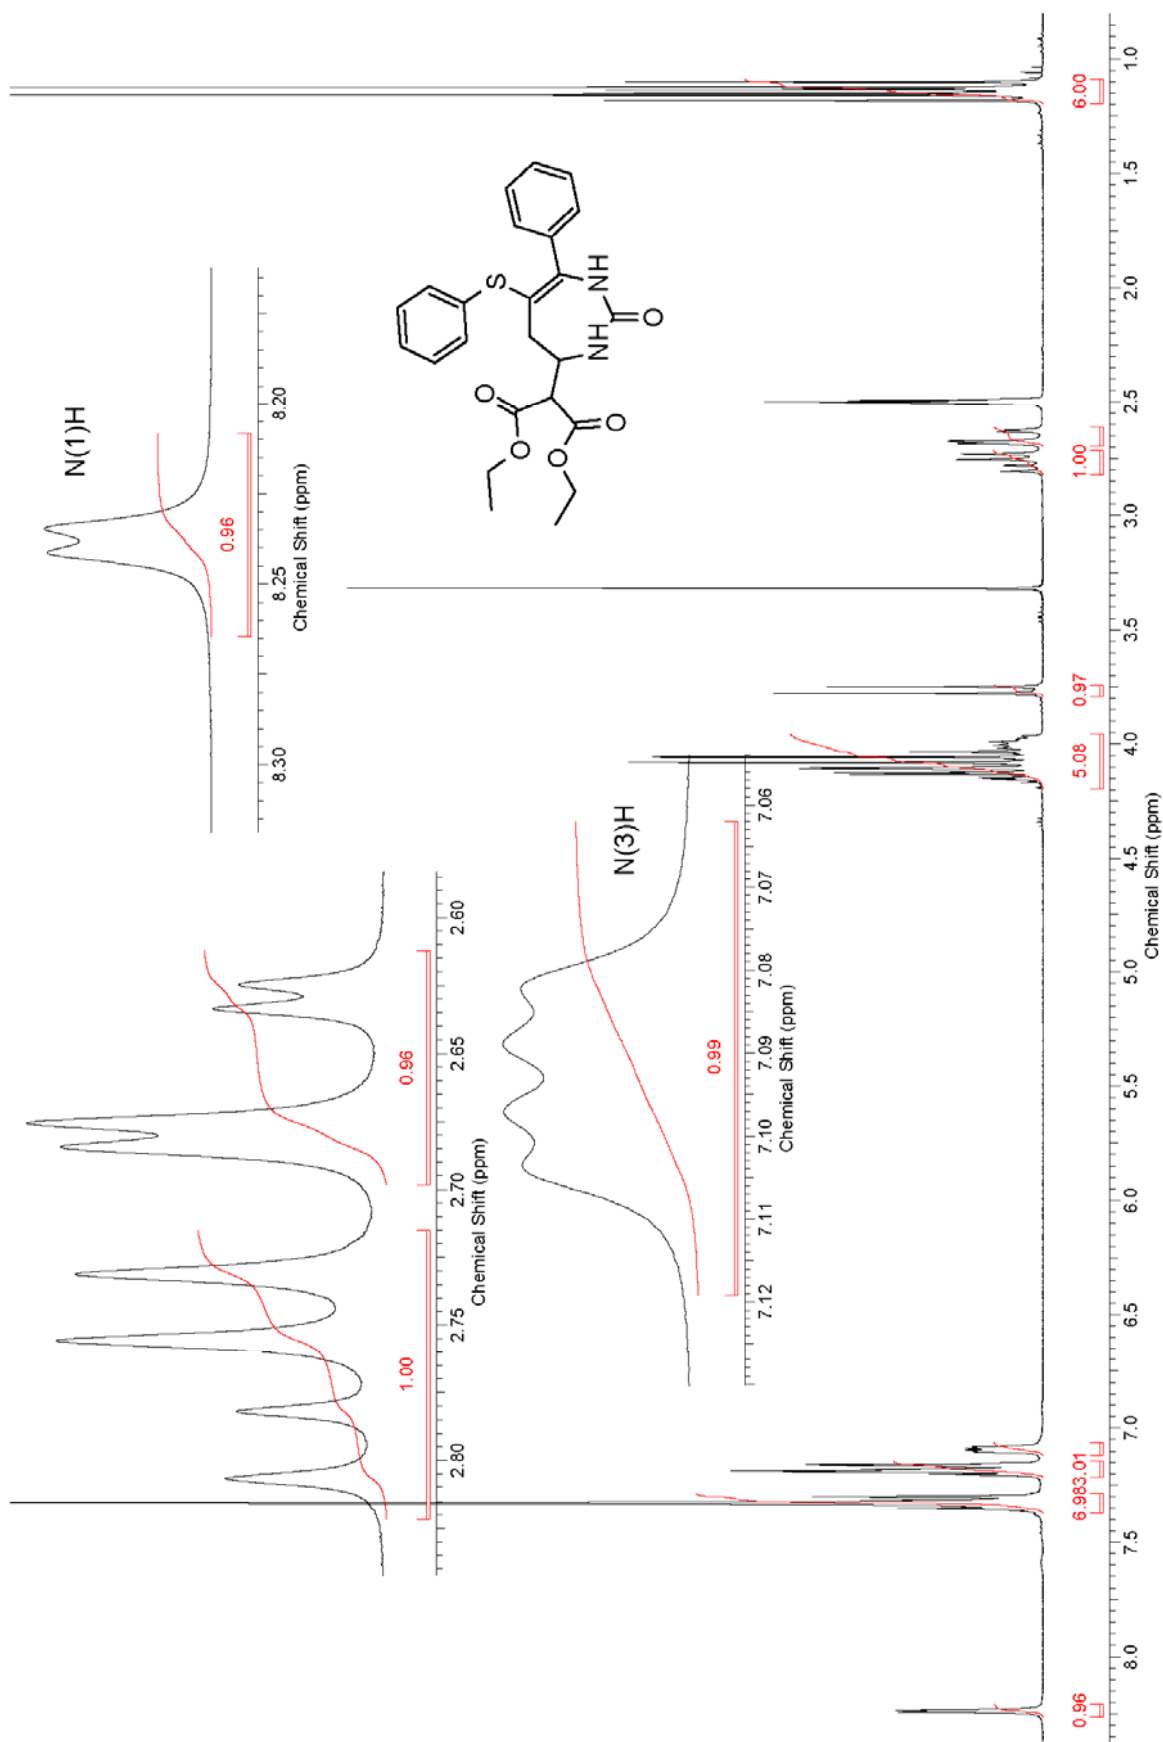

<sup>1</sup>H NMR spectrum of **16b** in DMSO-d<sub>6</sub>, Bruker DPX 300

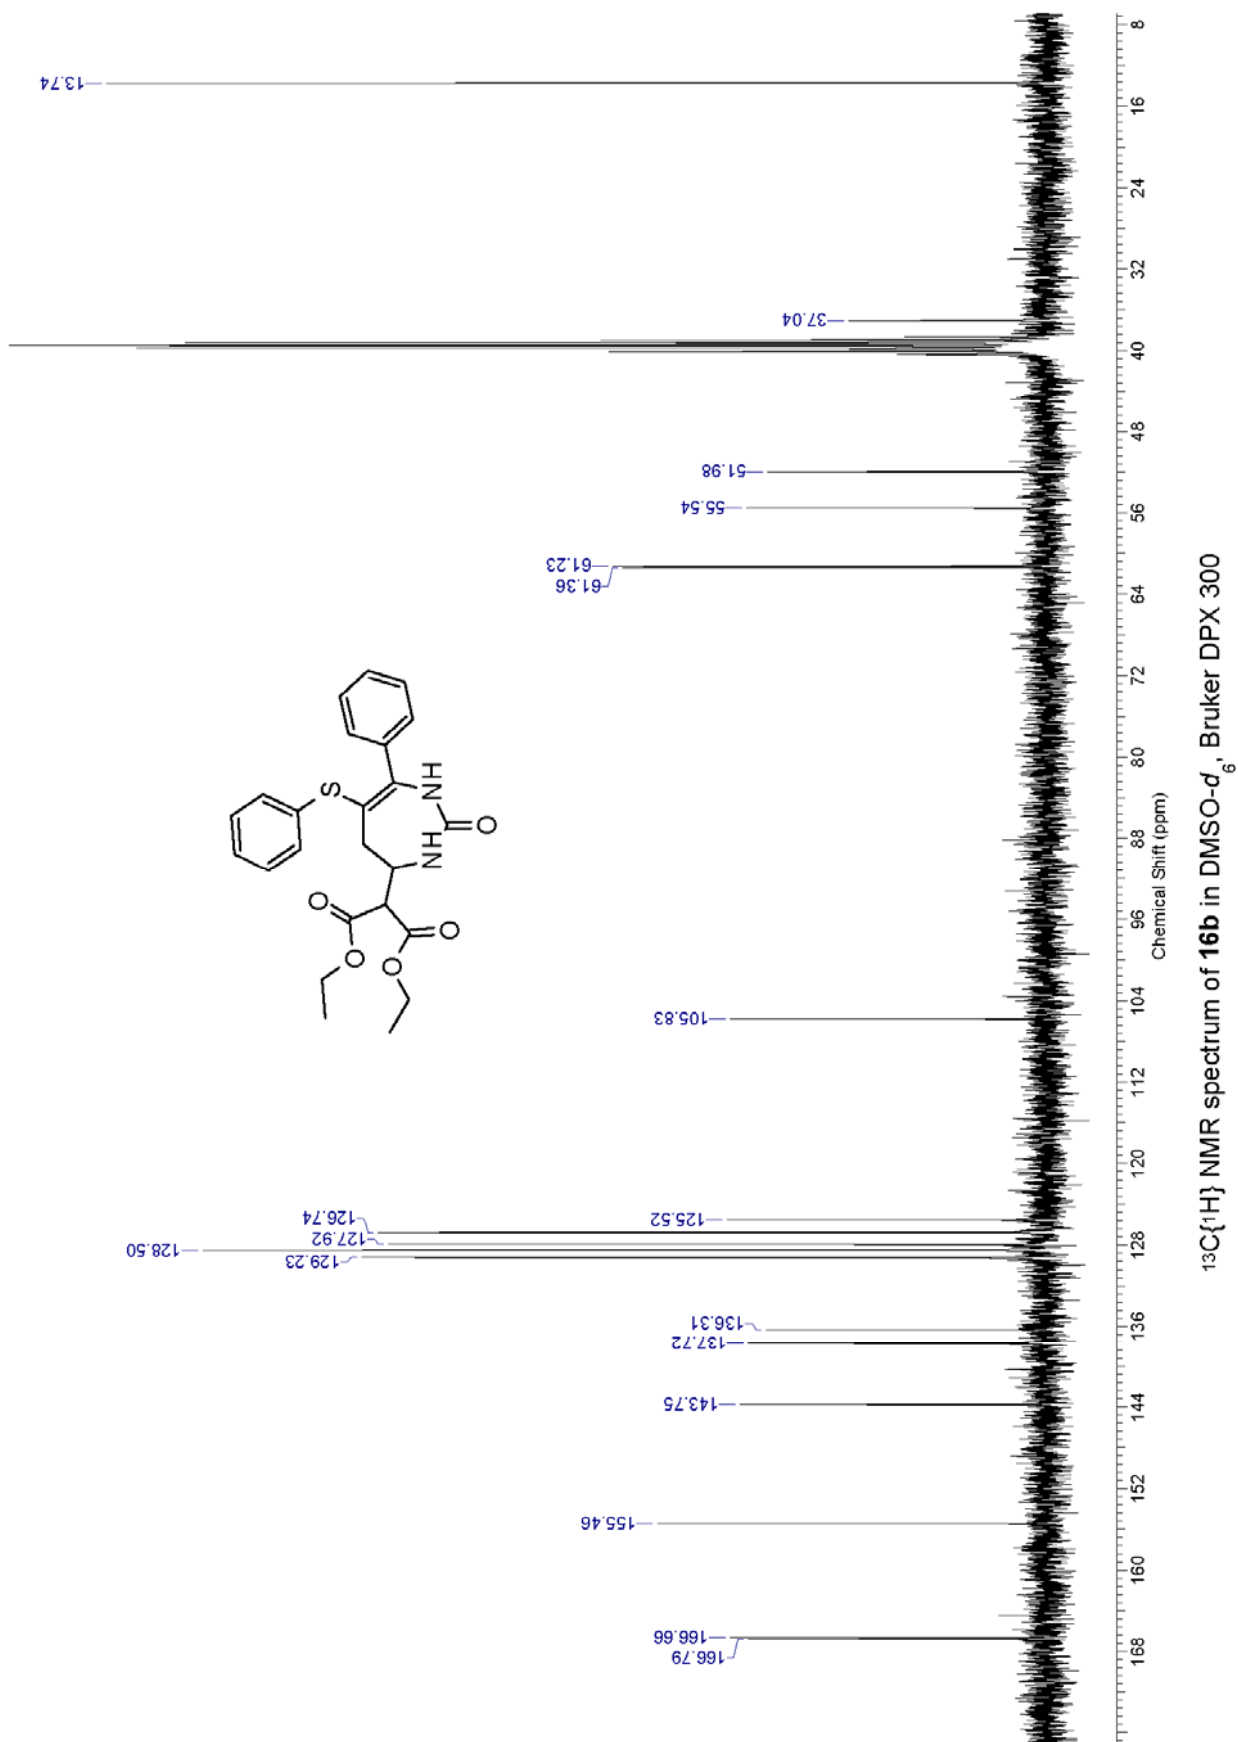

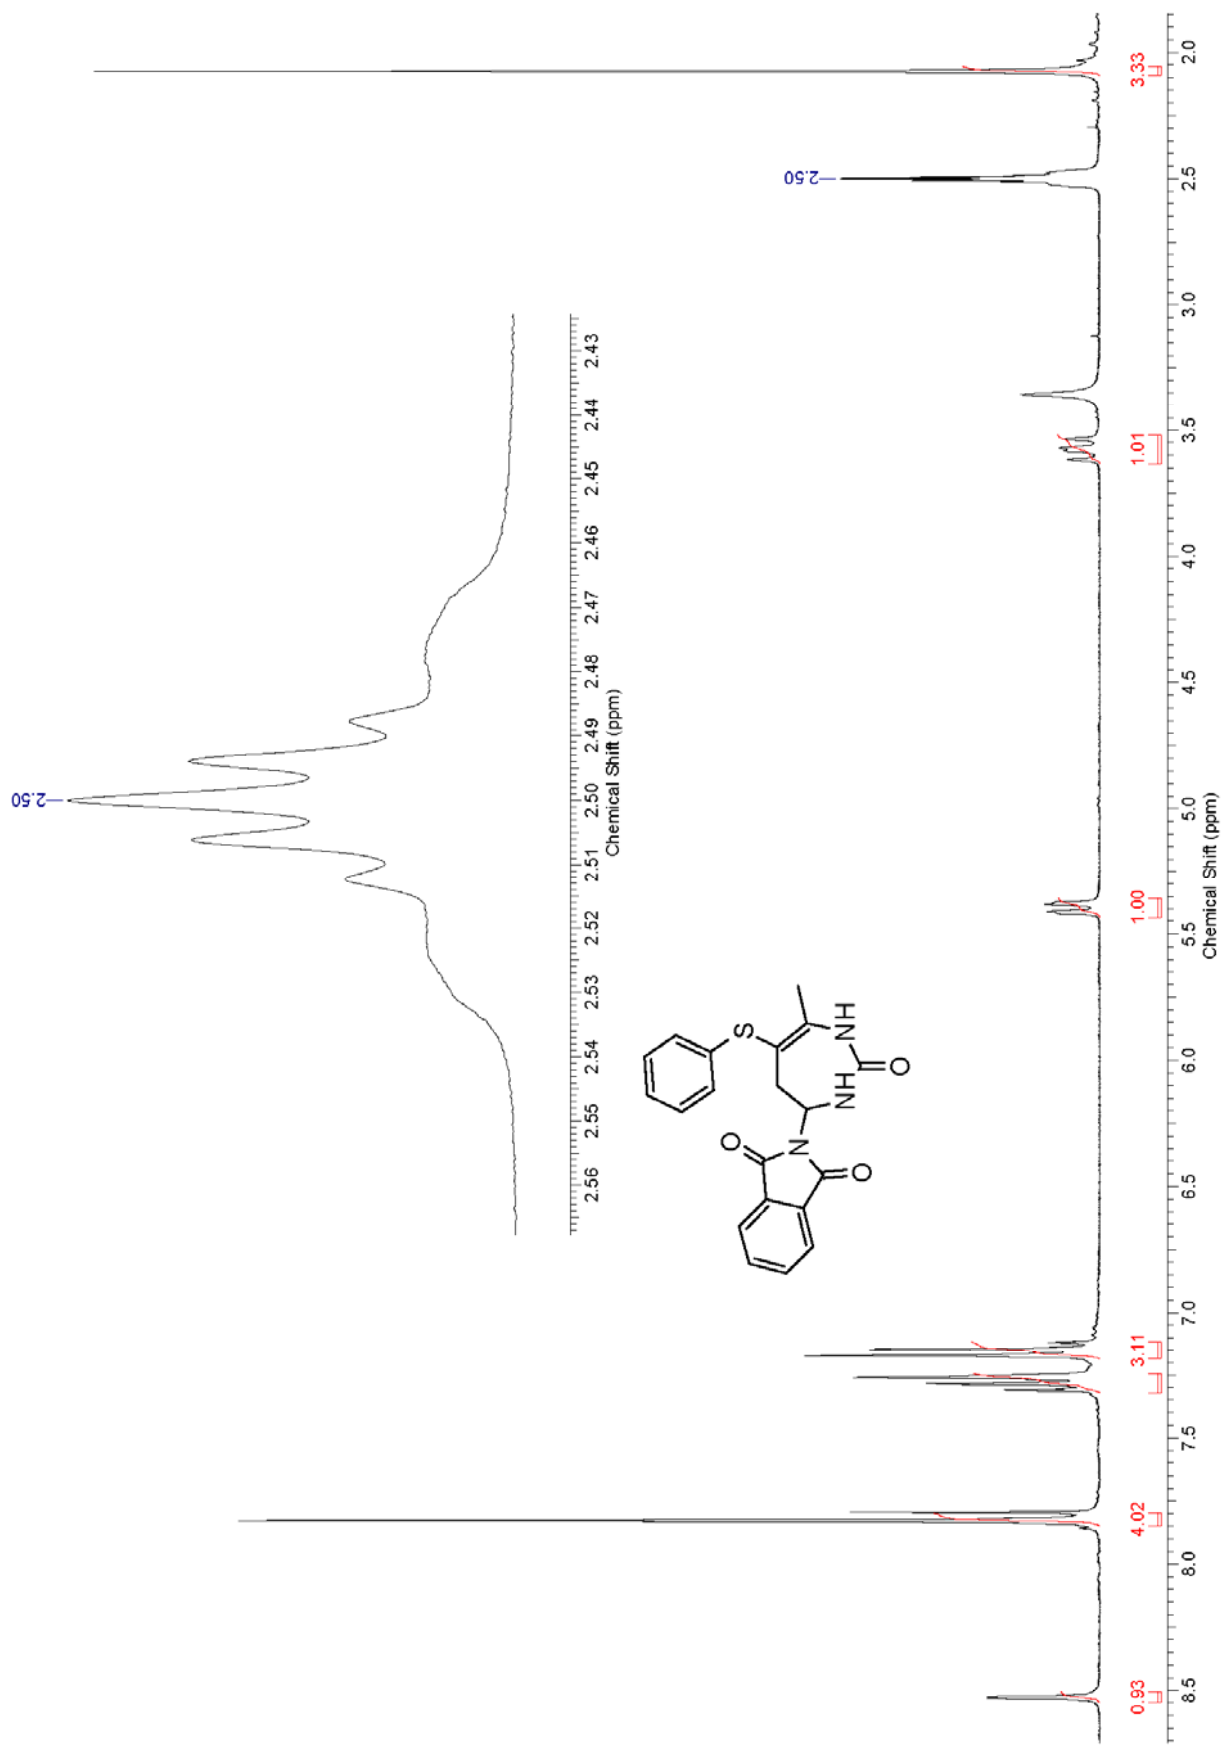

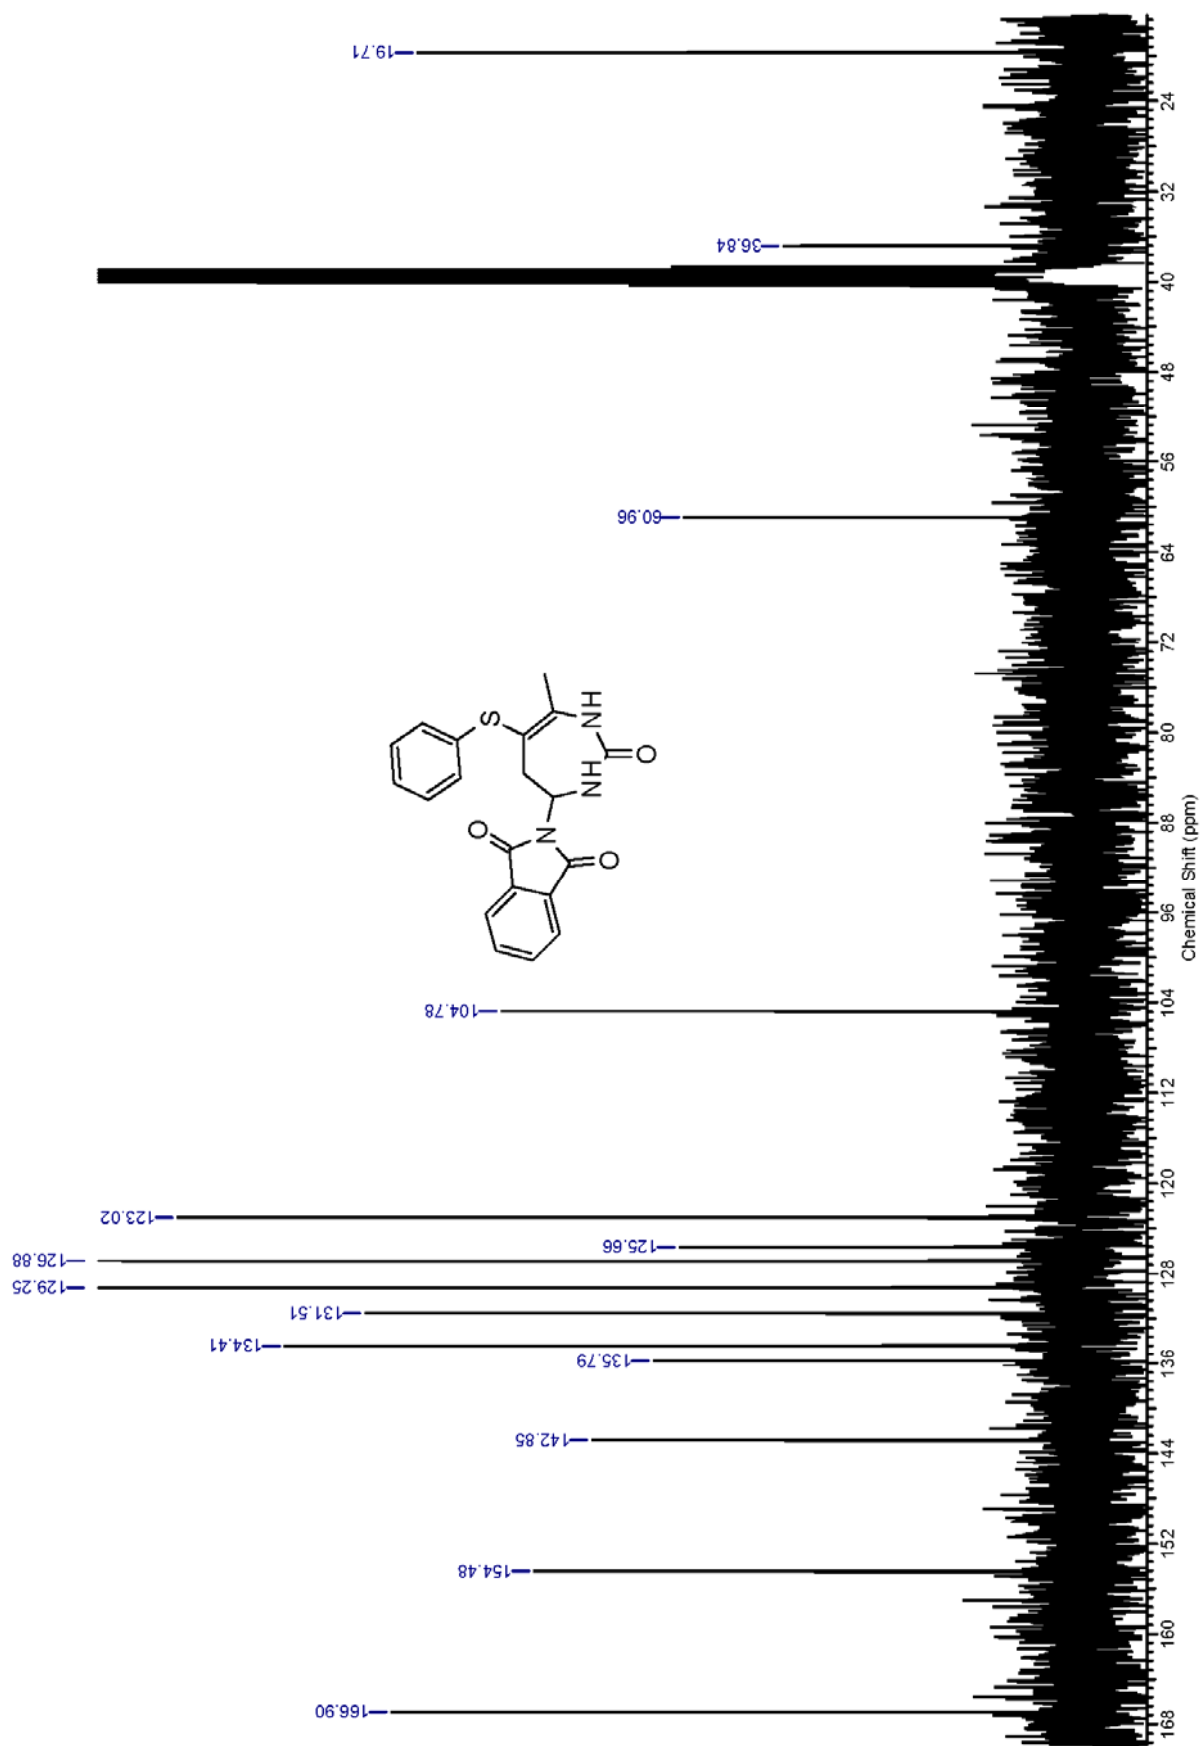

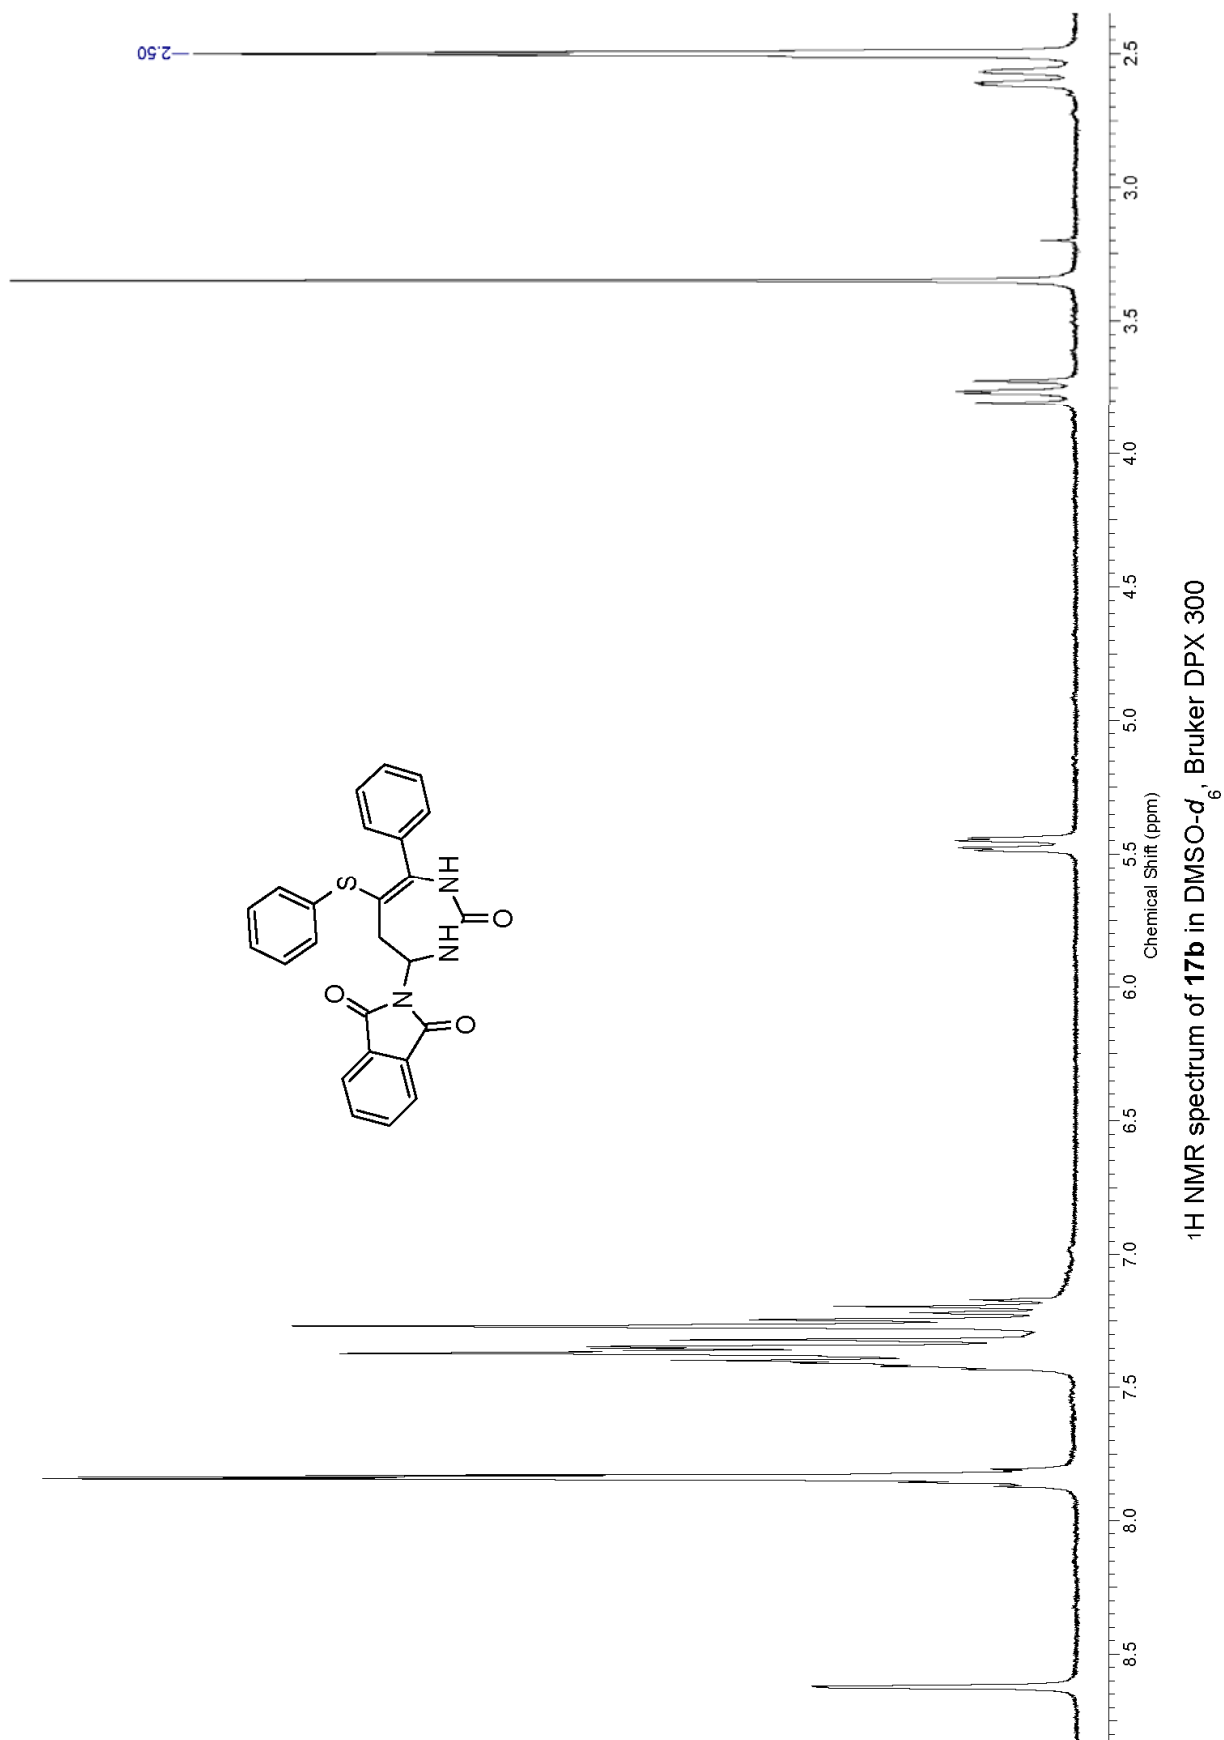

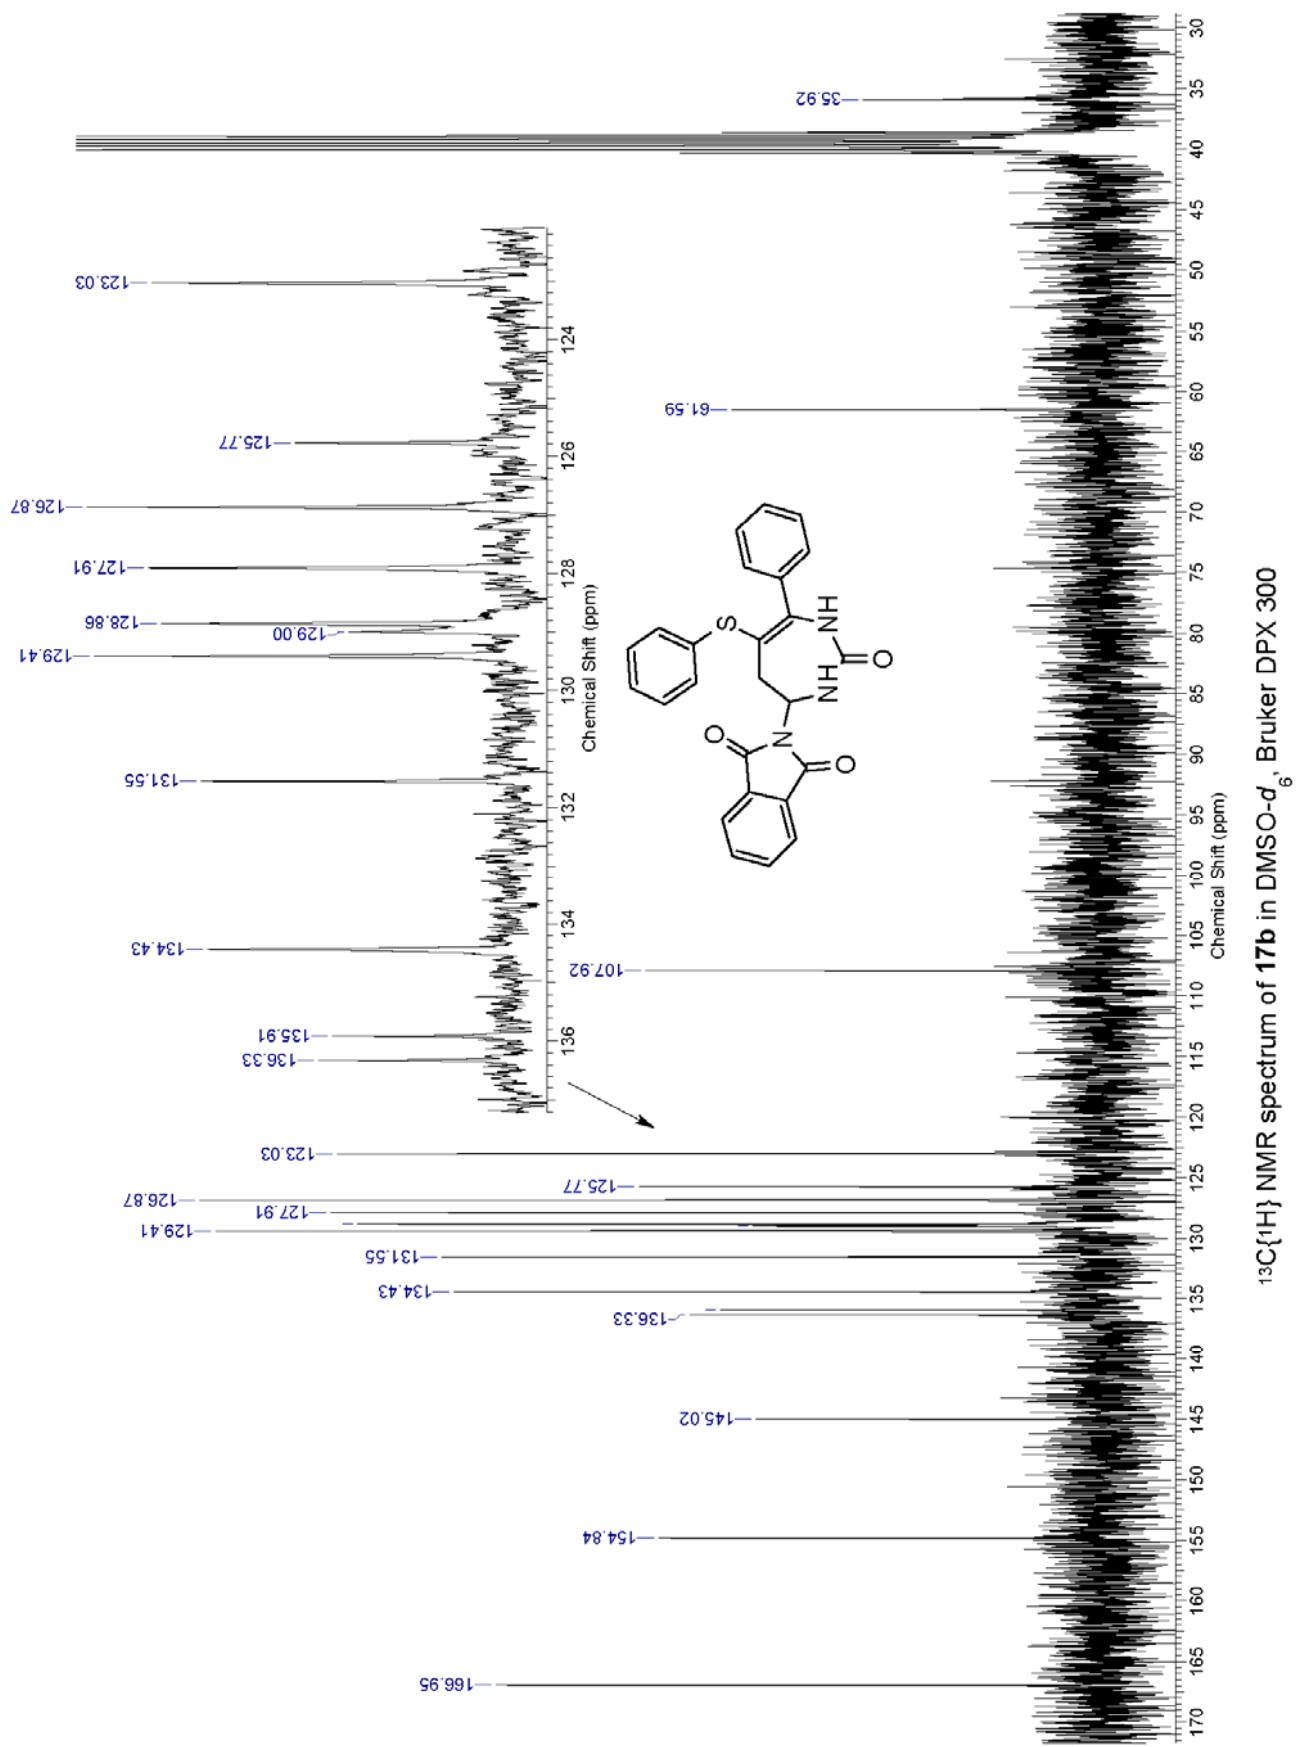

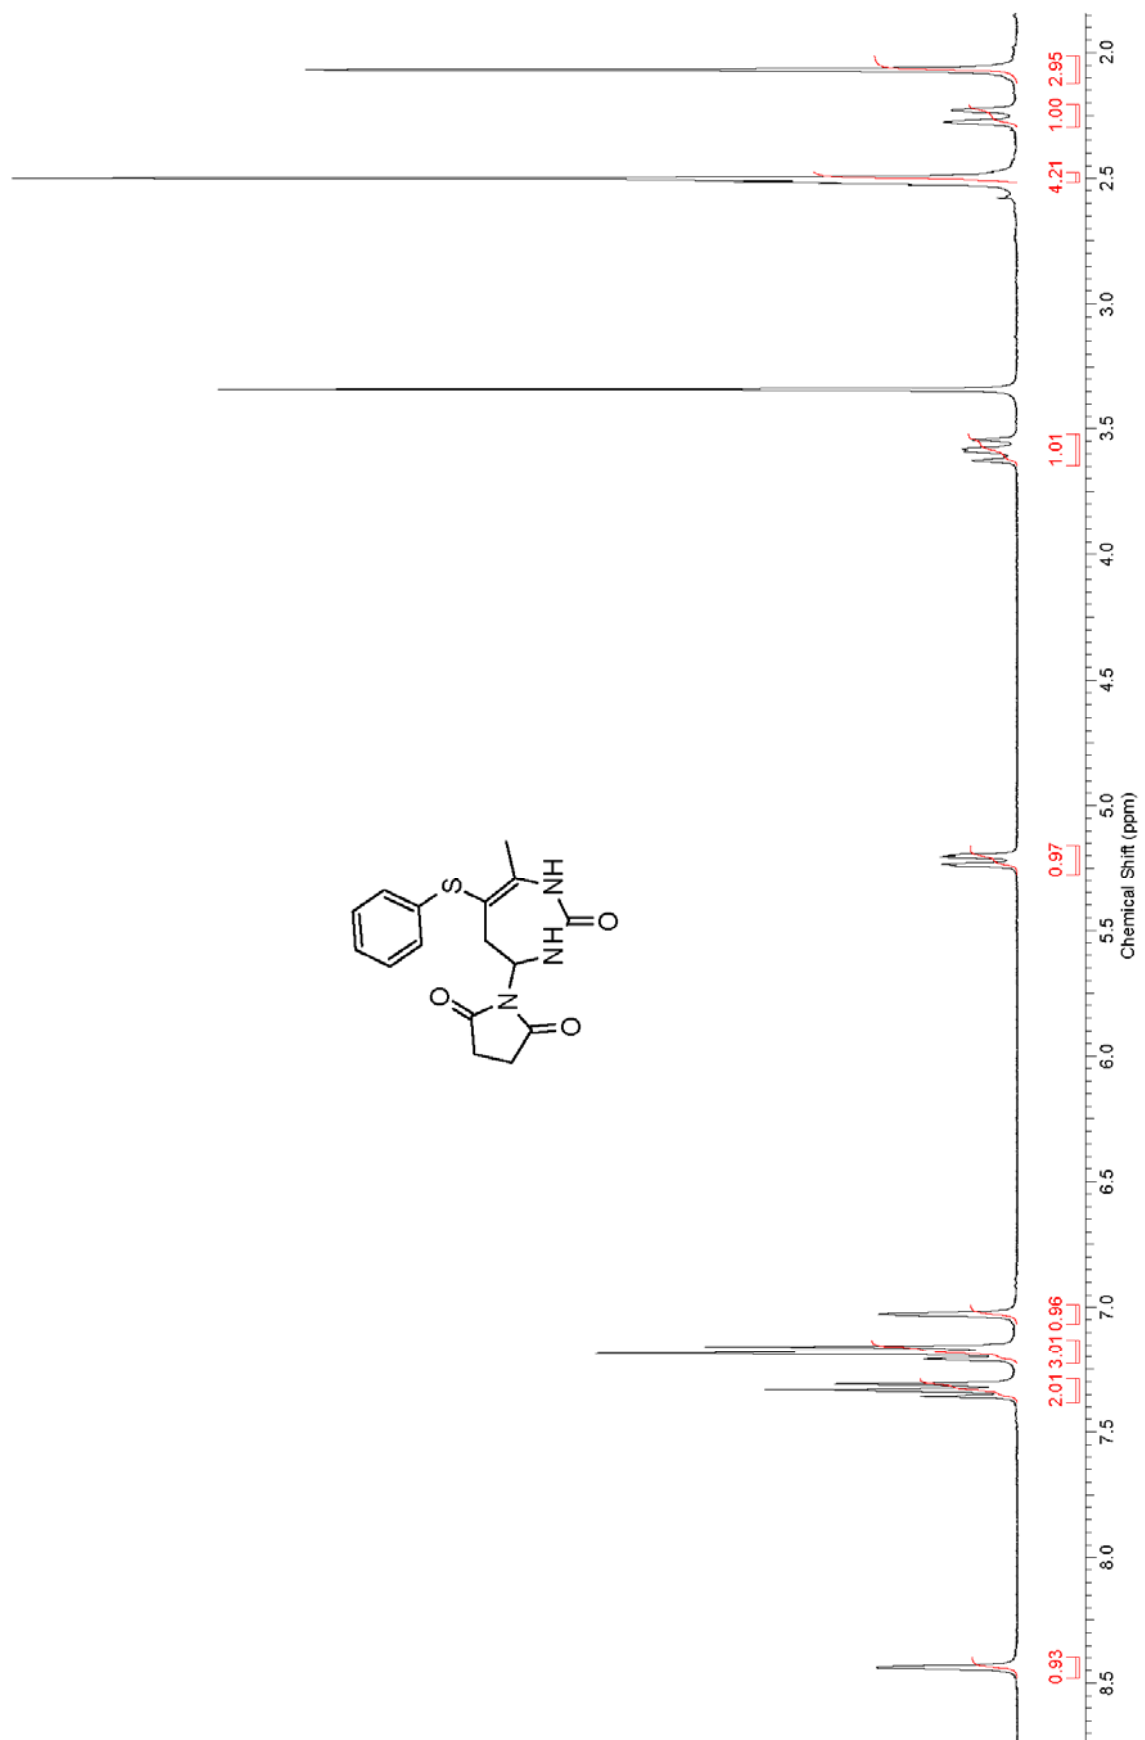

<sup>1</sup>H NMR spectrum of **18a** in DMSO-*d*<sub>6</sub>, Bruker DPX 300



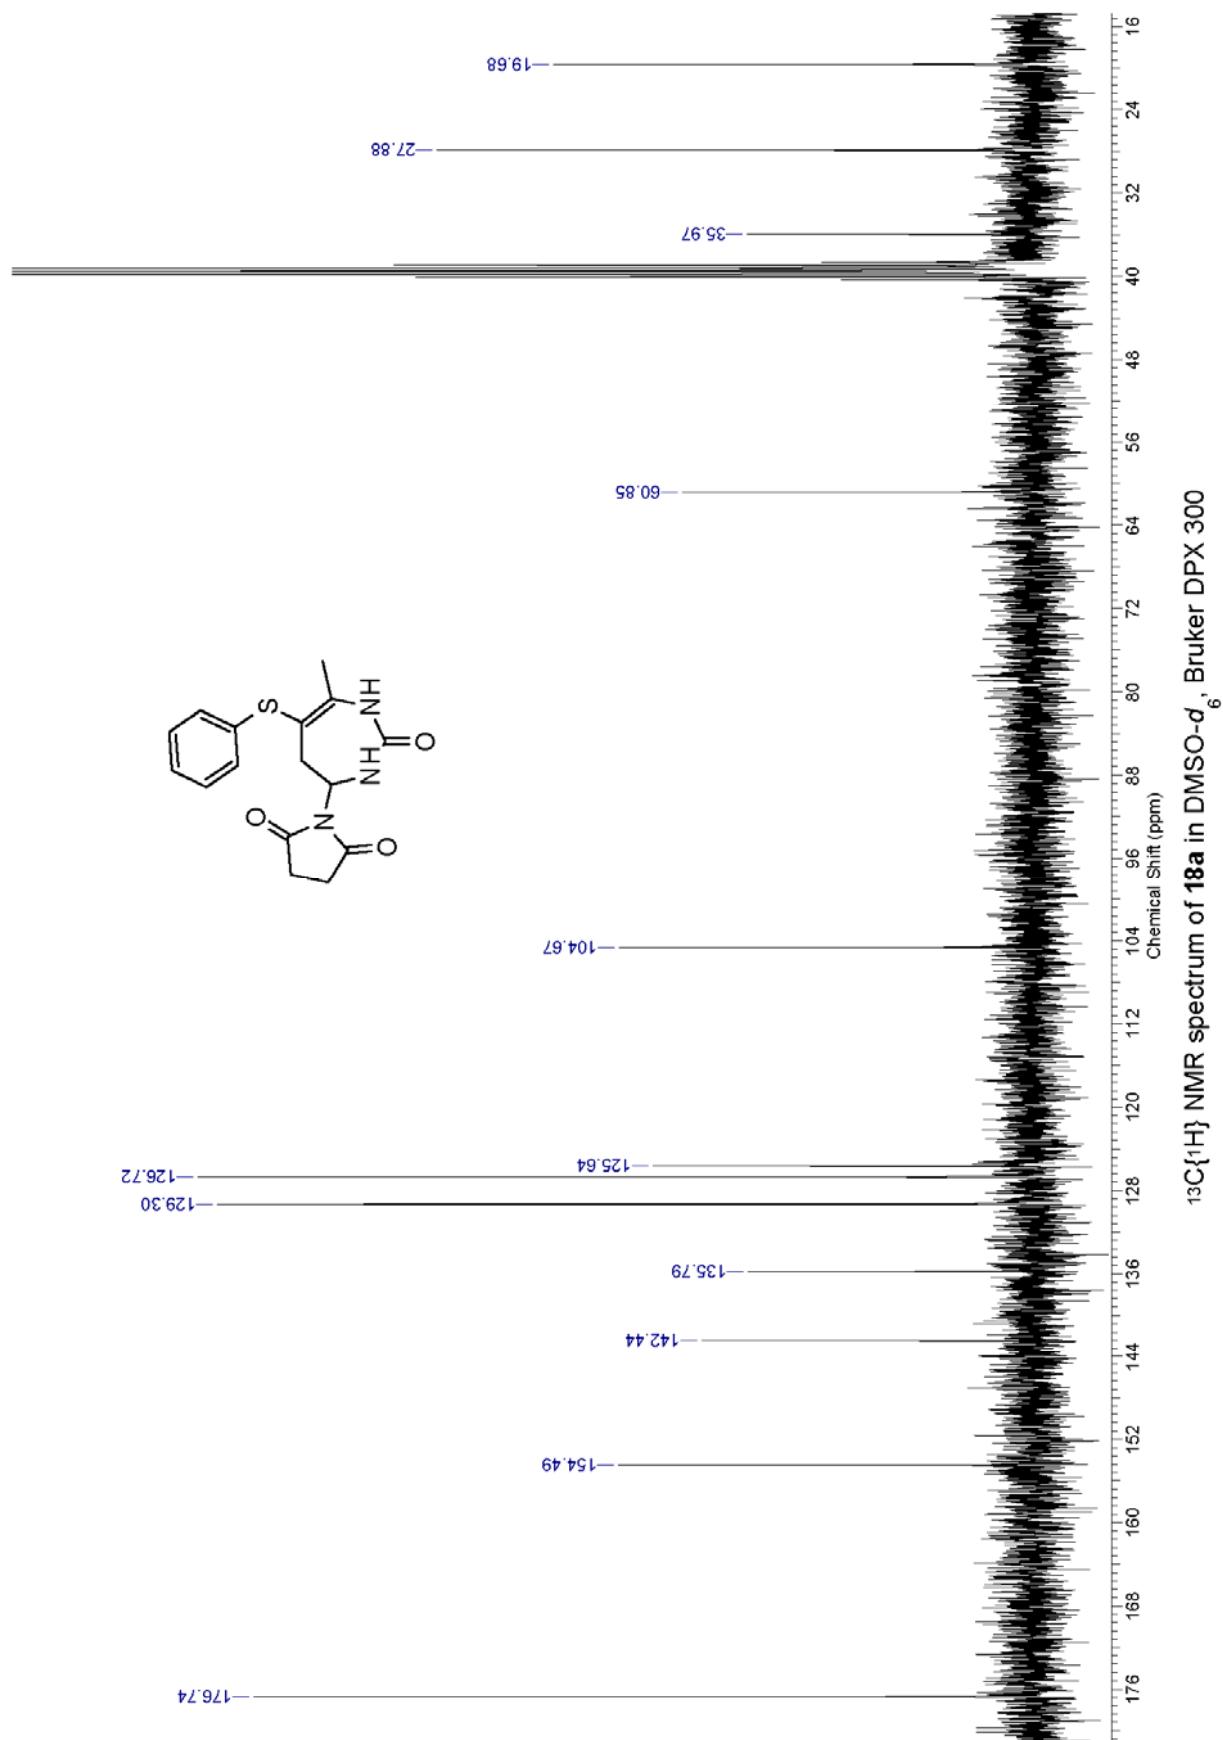

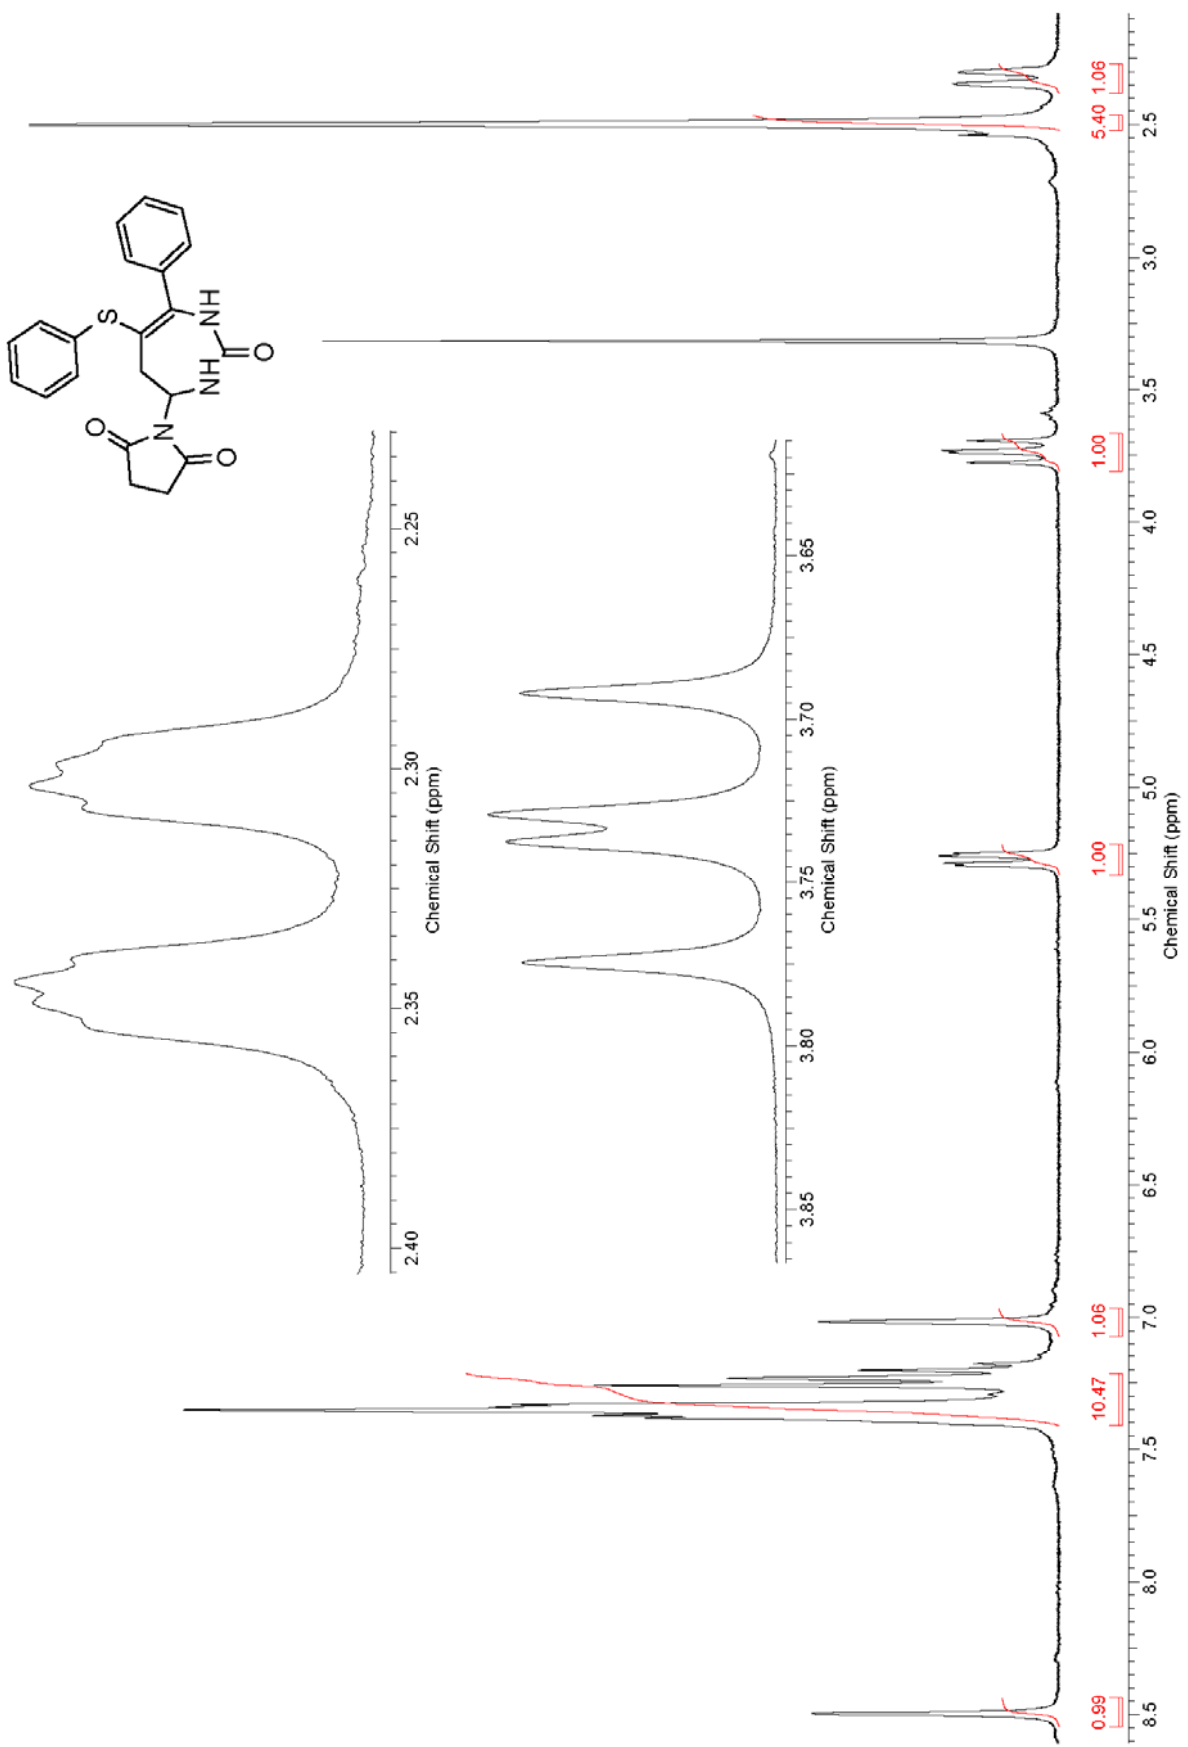

<sup>1</sup>H NMR spectrum of **18b** in DMSO-d<sub>6</sub>, Bruker DPX 300

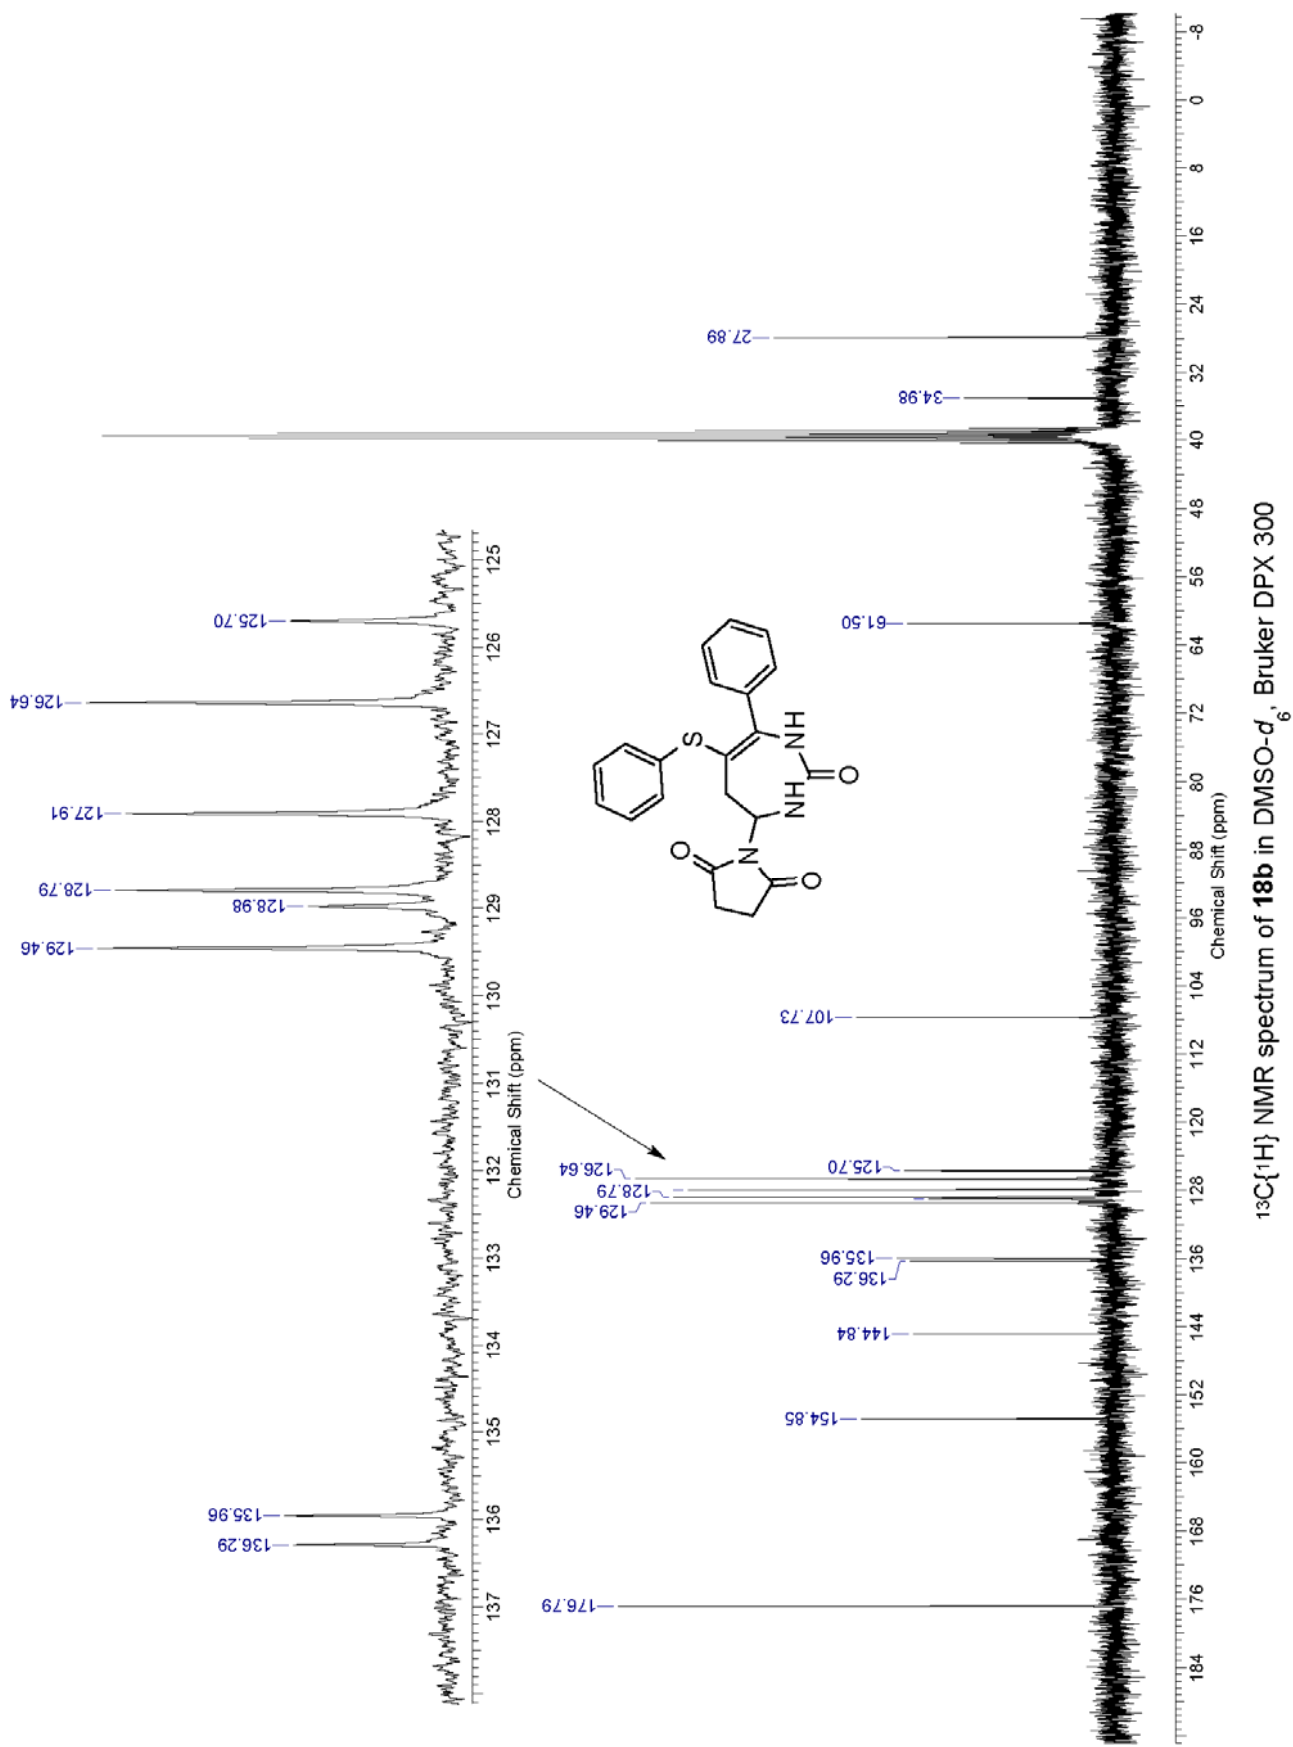

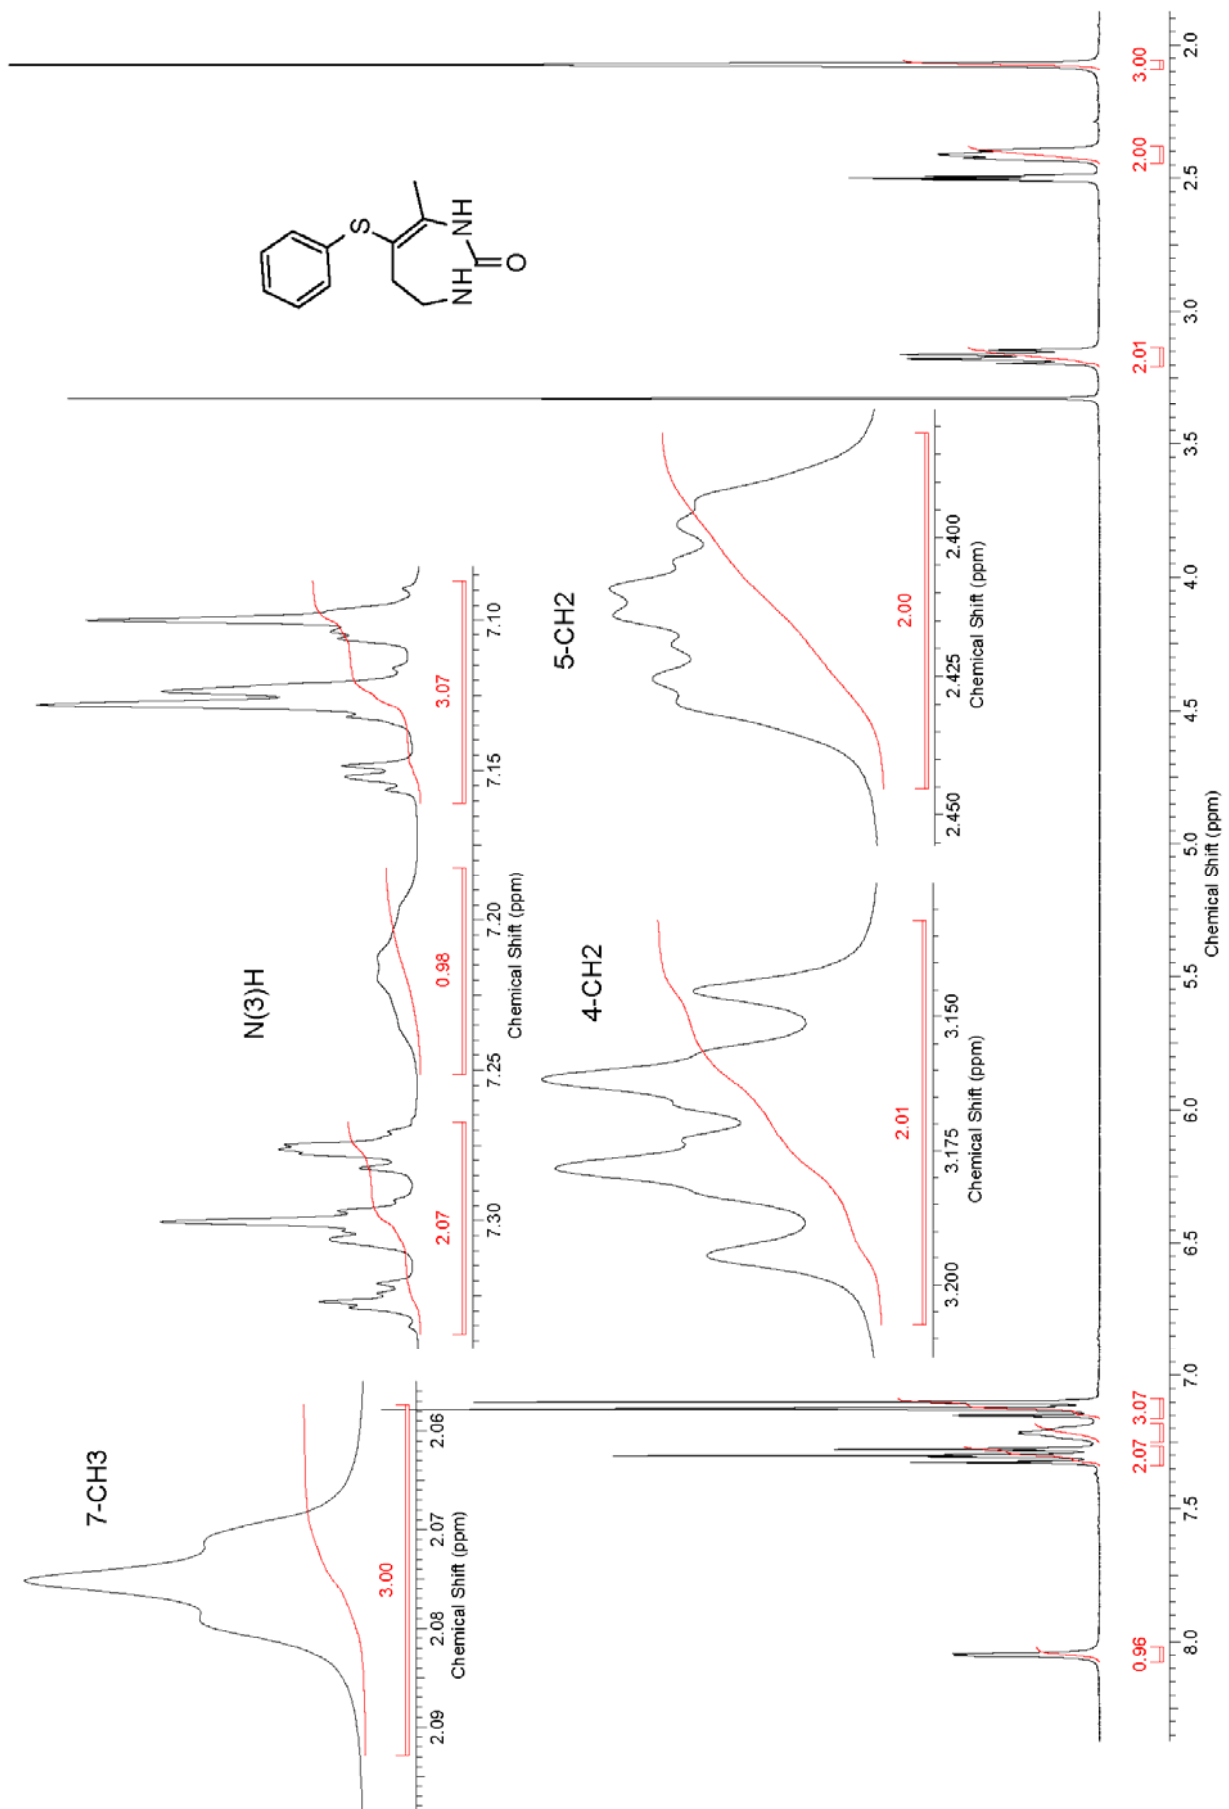

<sup>1</sup>H NMR spectrum of **19a** in DMSO-*d*<sub>6</sub>, Bruker DPX 300

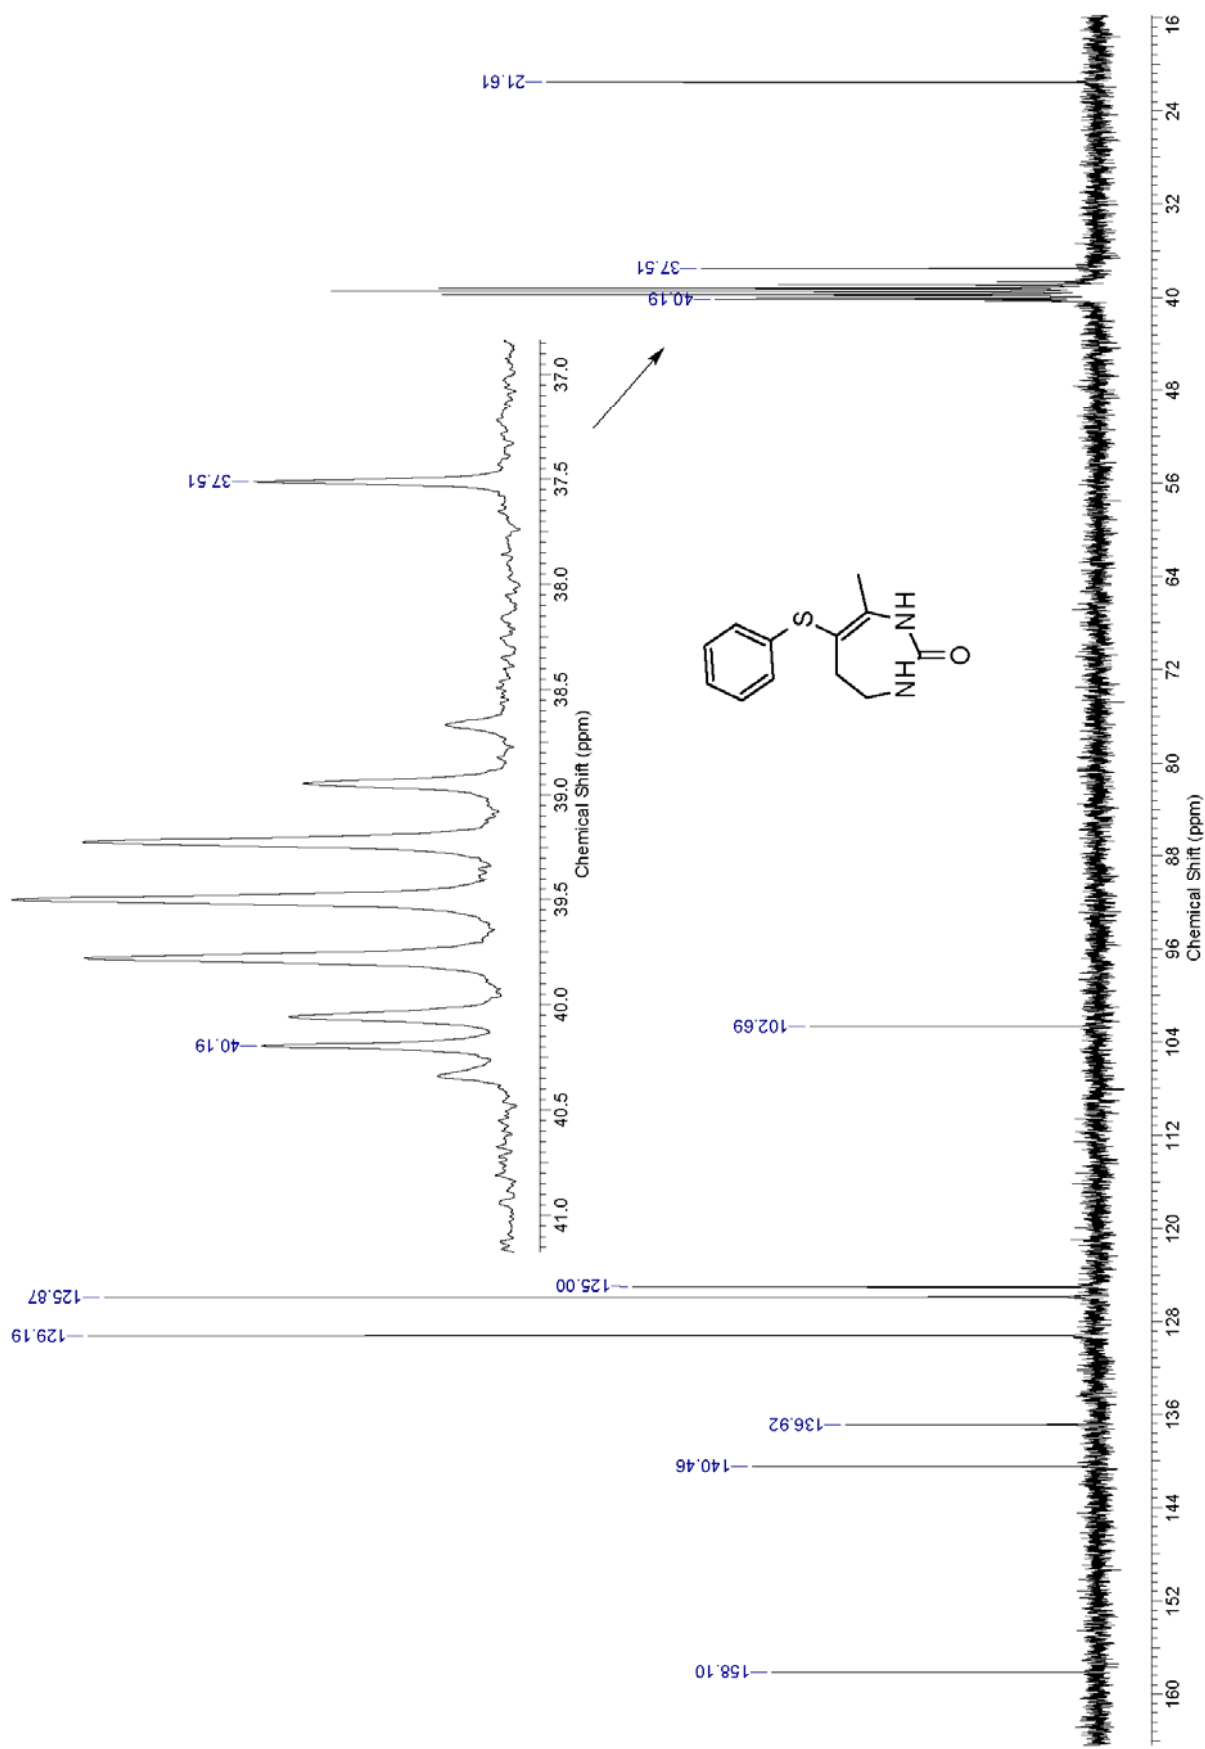

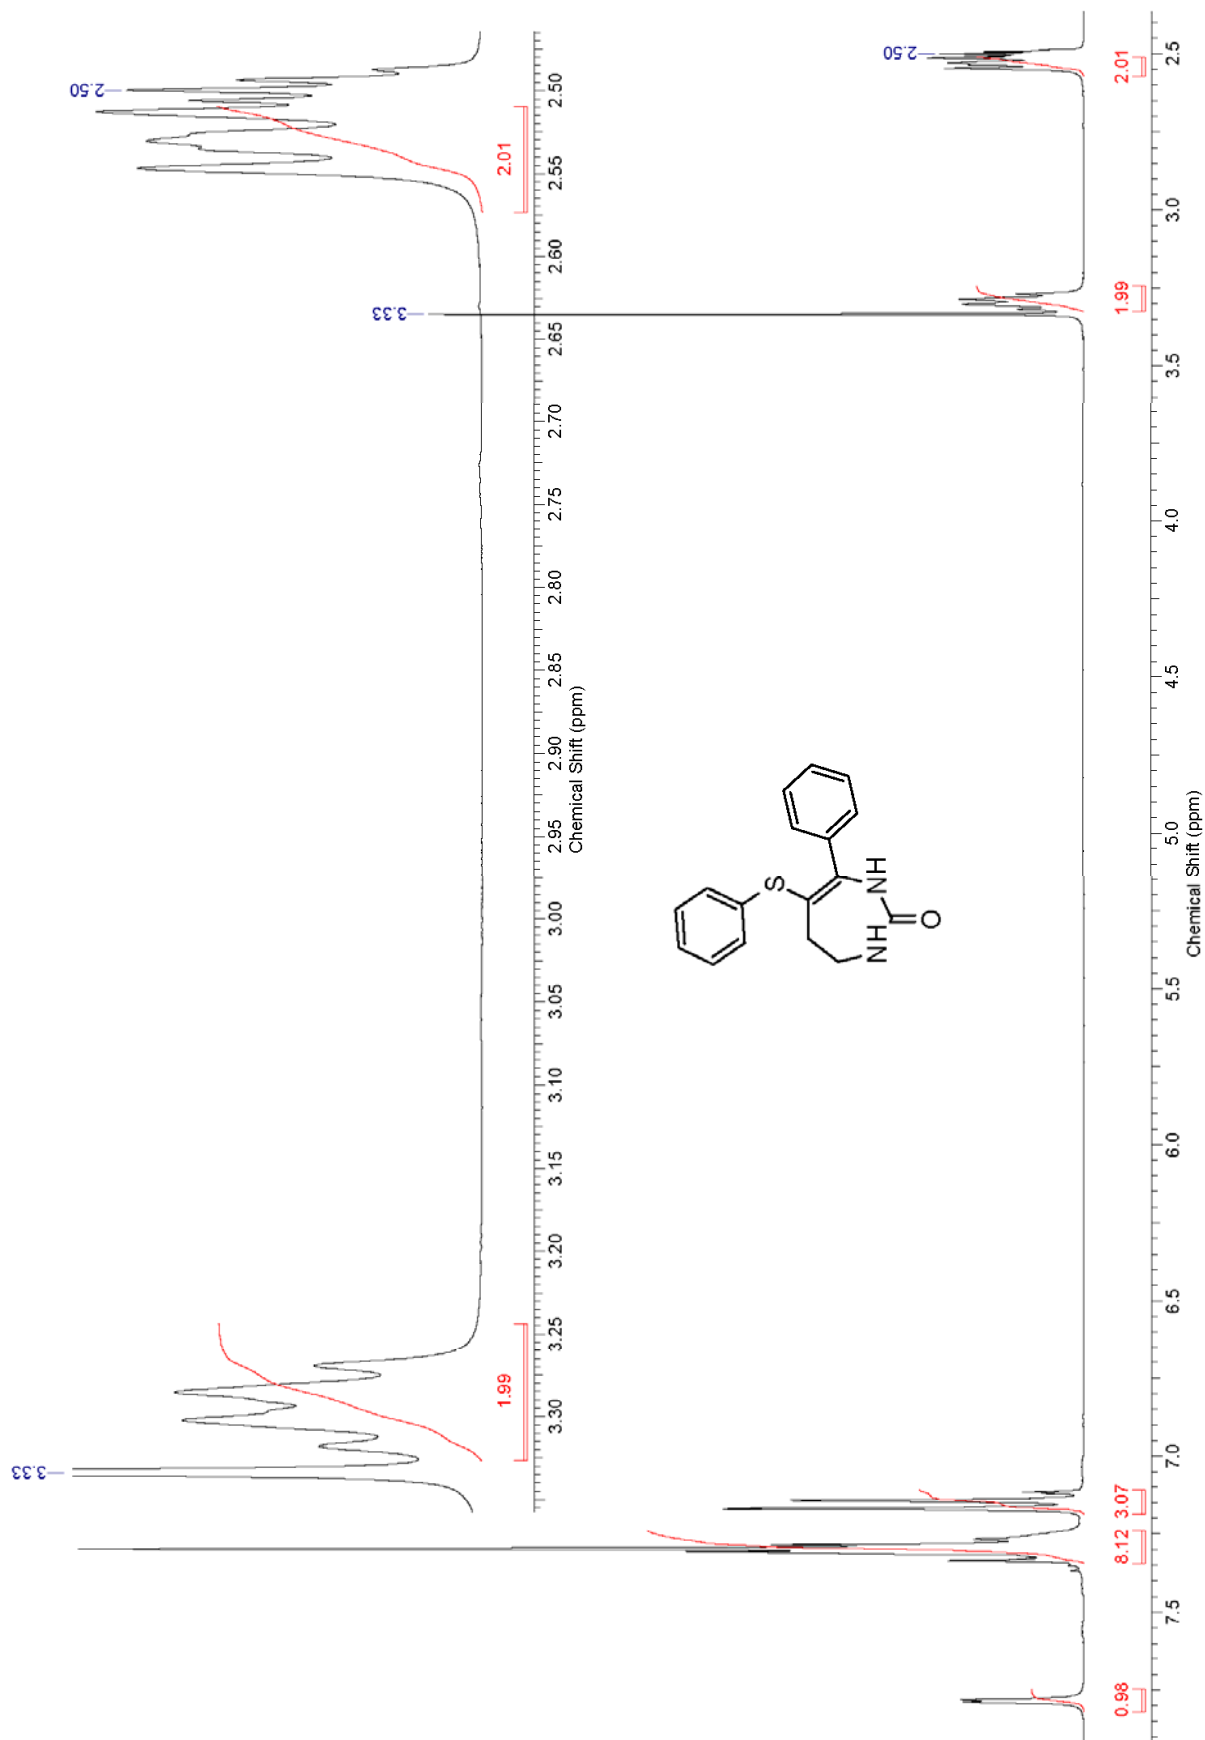

<sup>1</sup>H NMR spectrum of **19b** in DMSO-*d*<sub>6</sub>, Bruker DPX 300

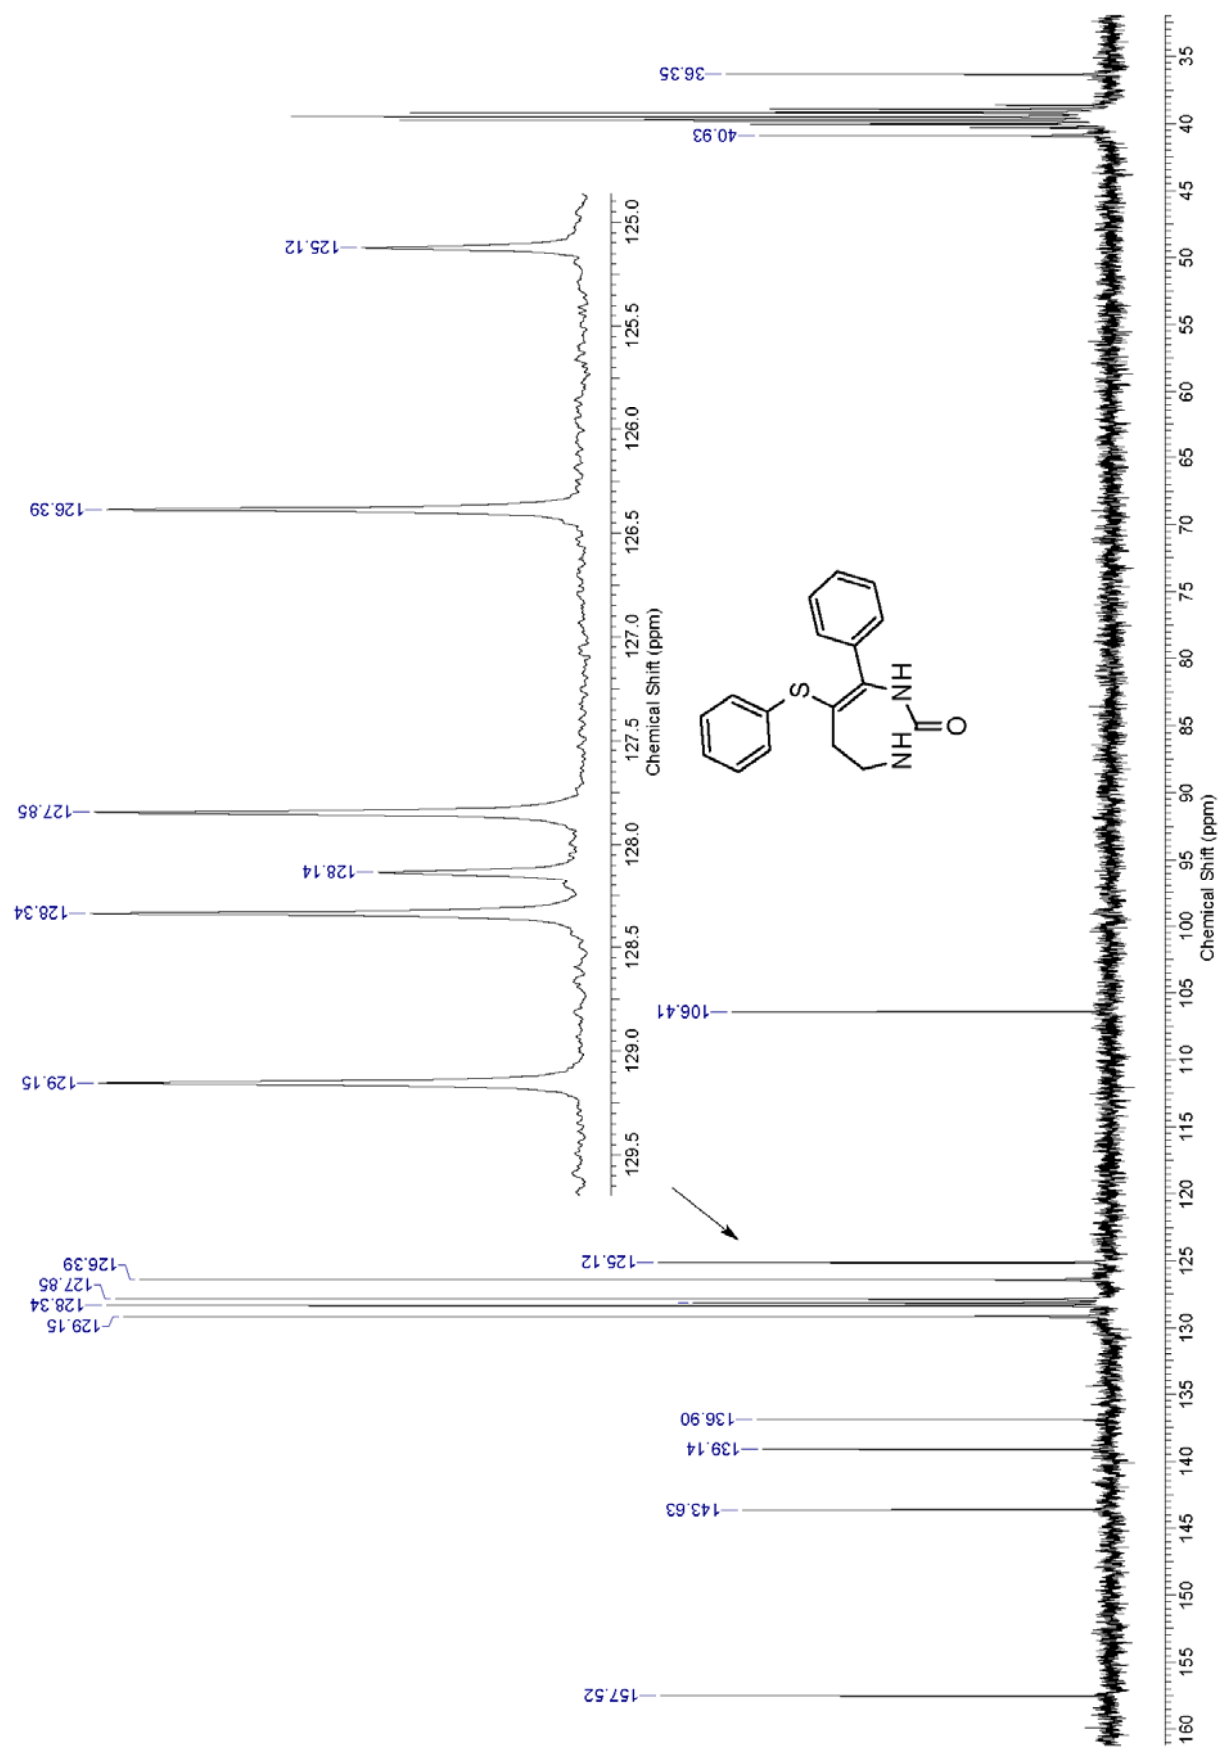

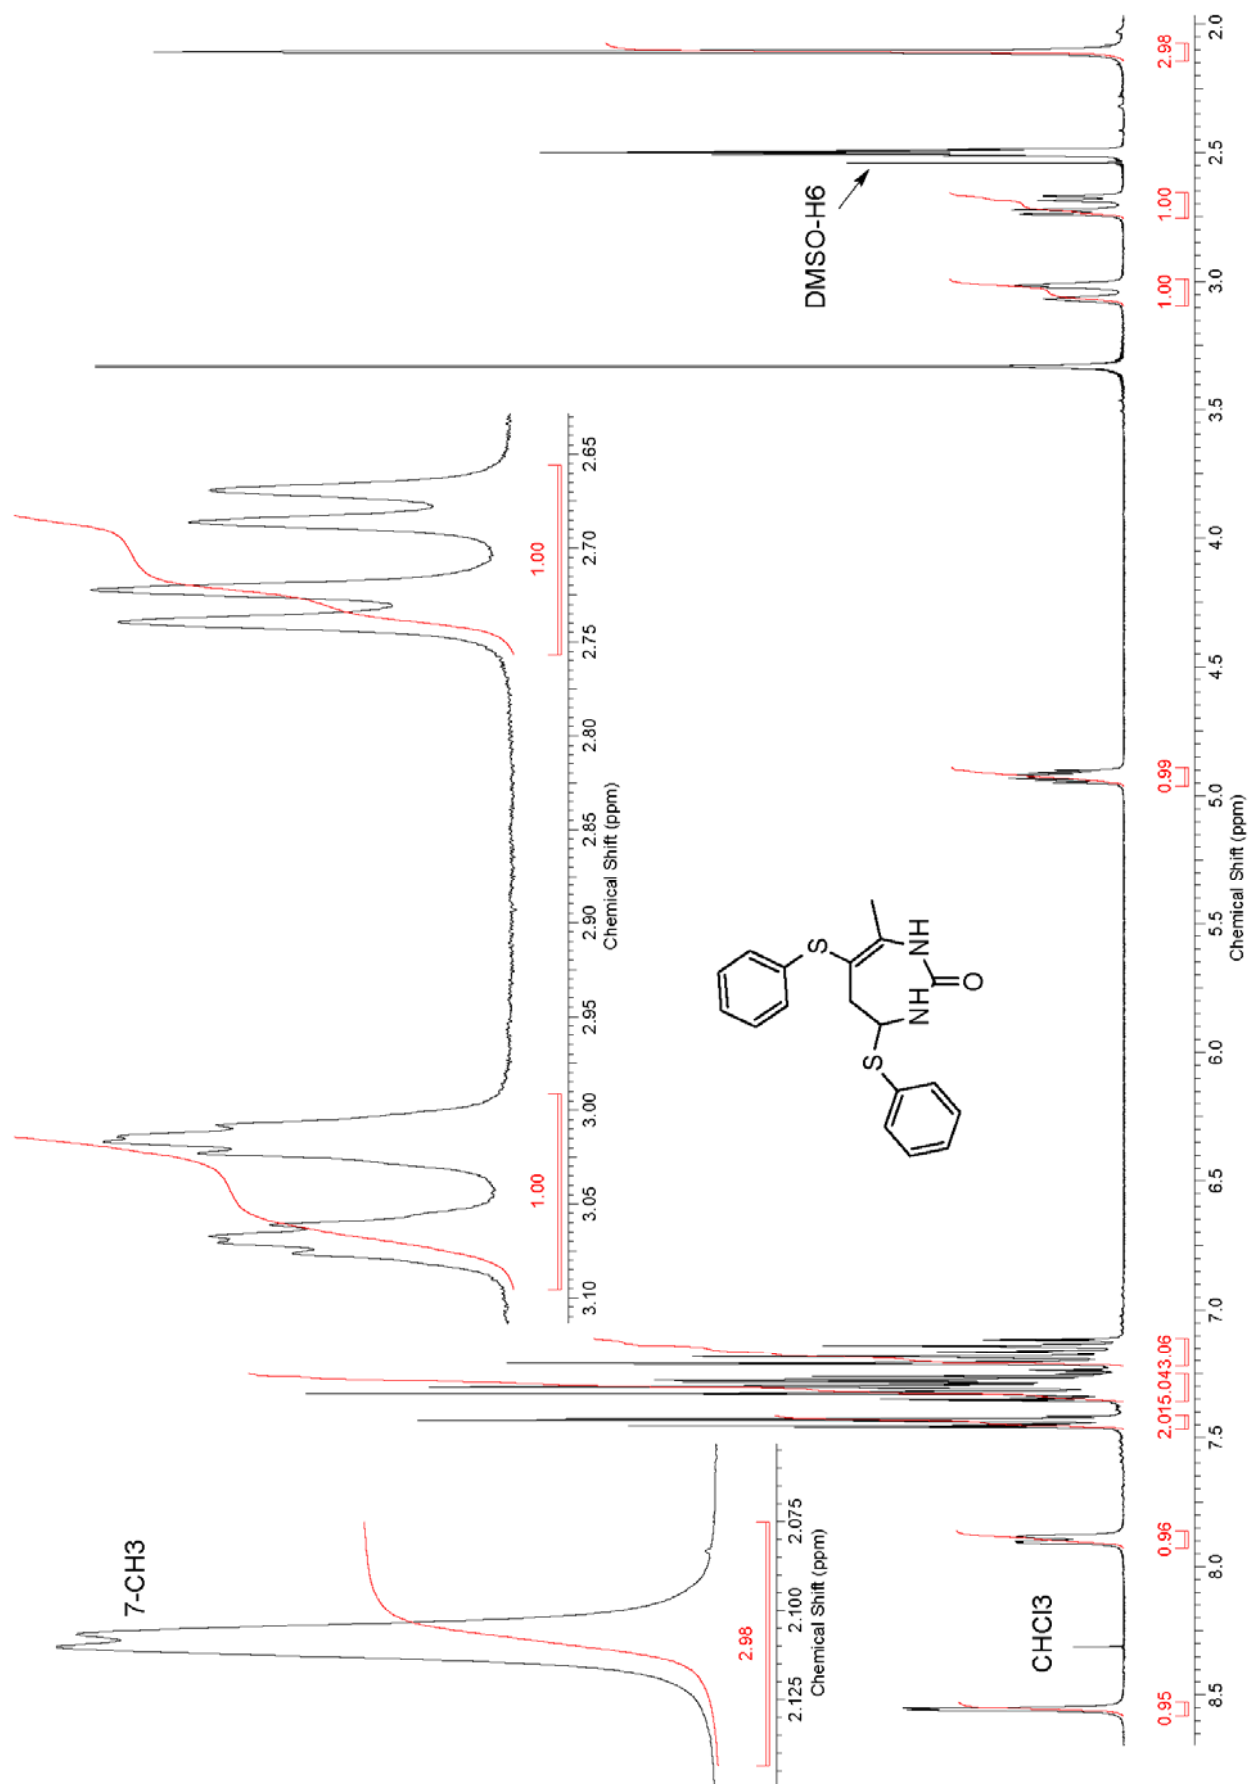



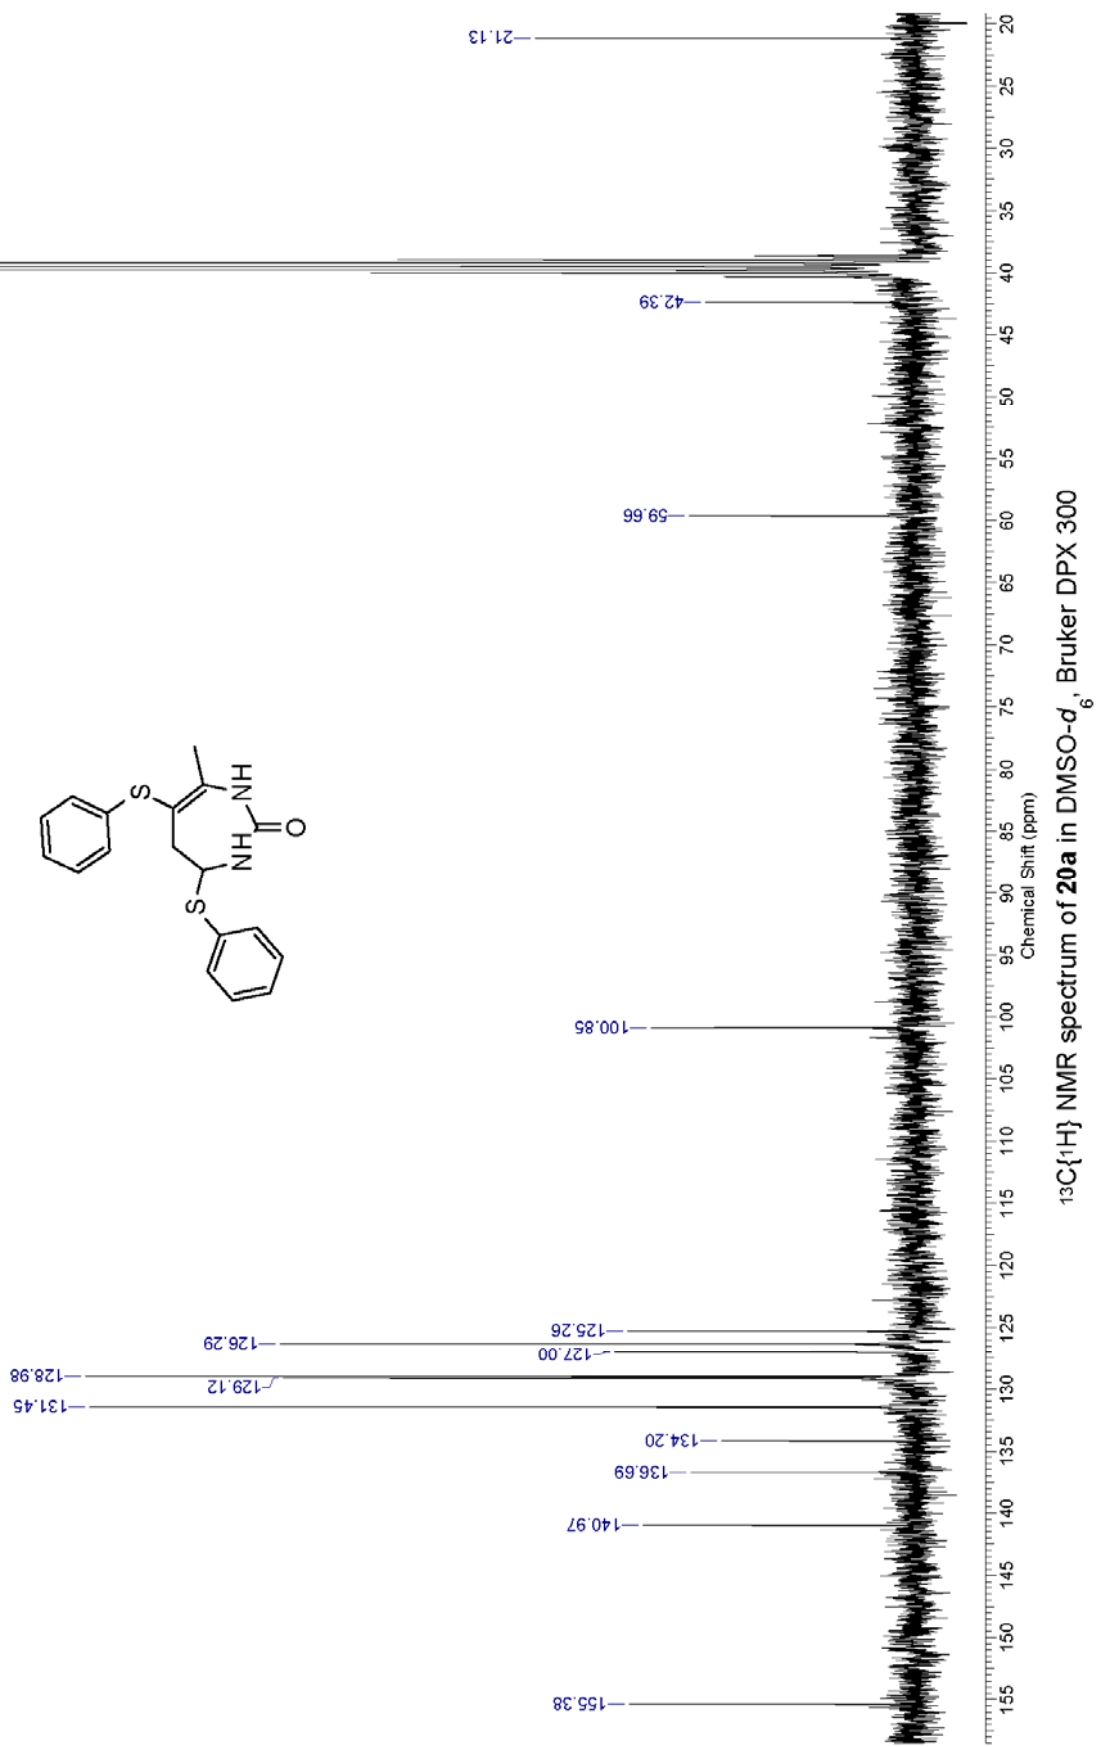

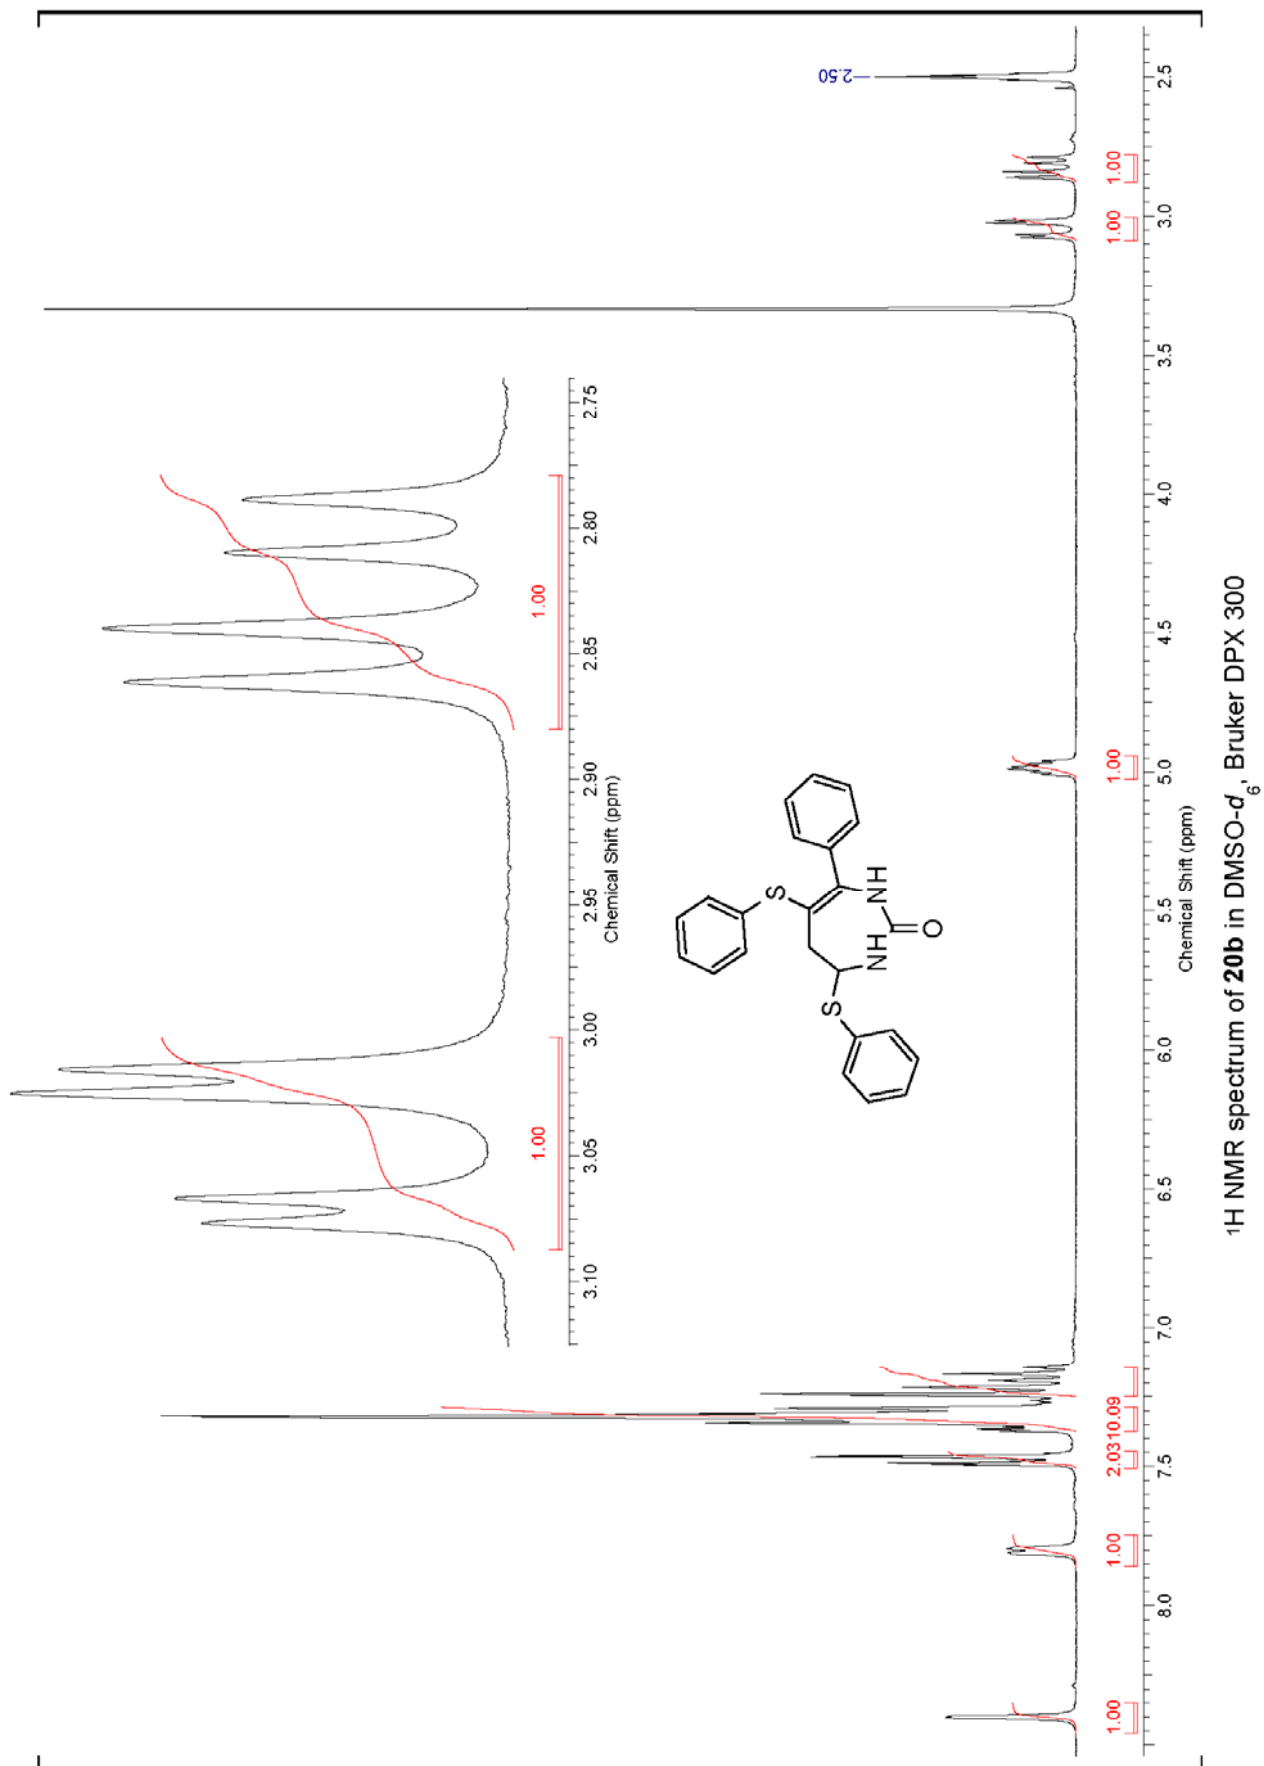

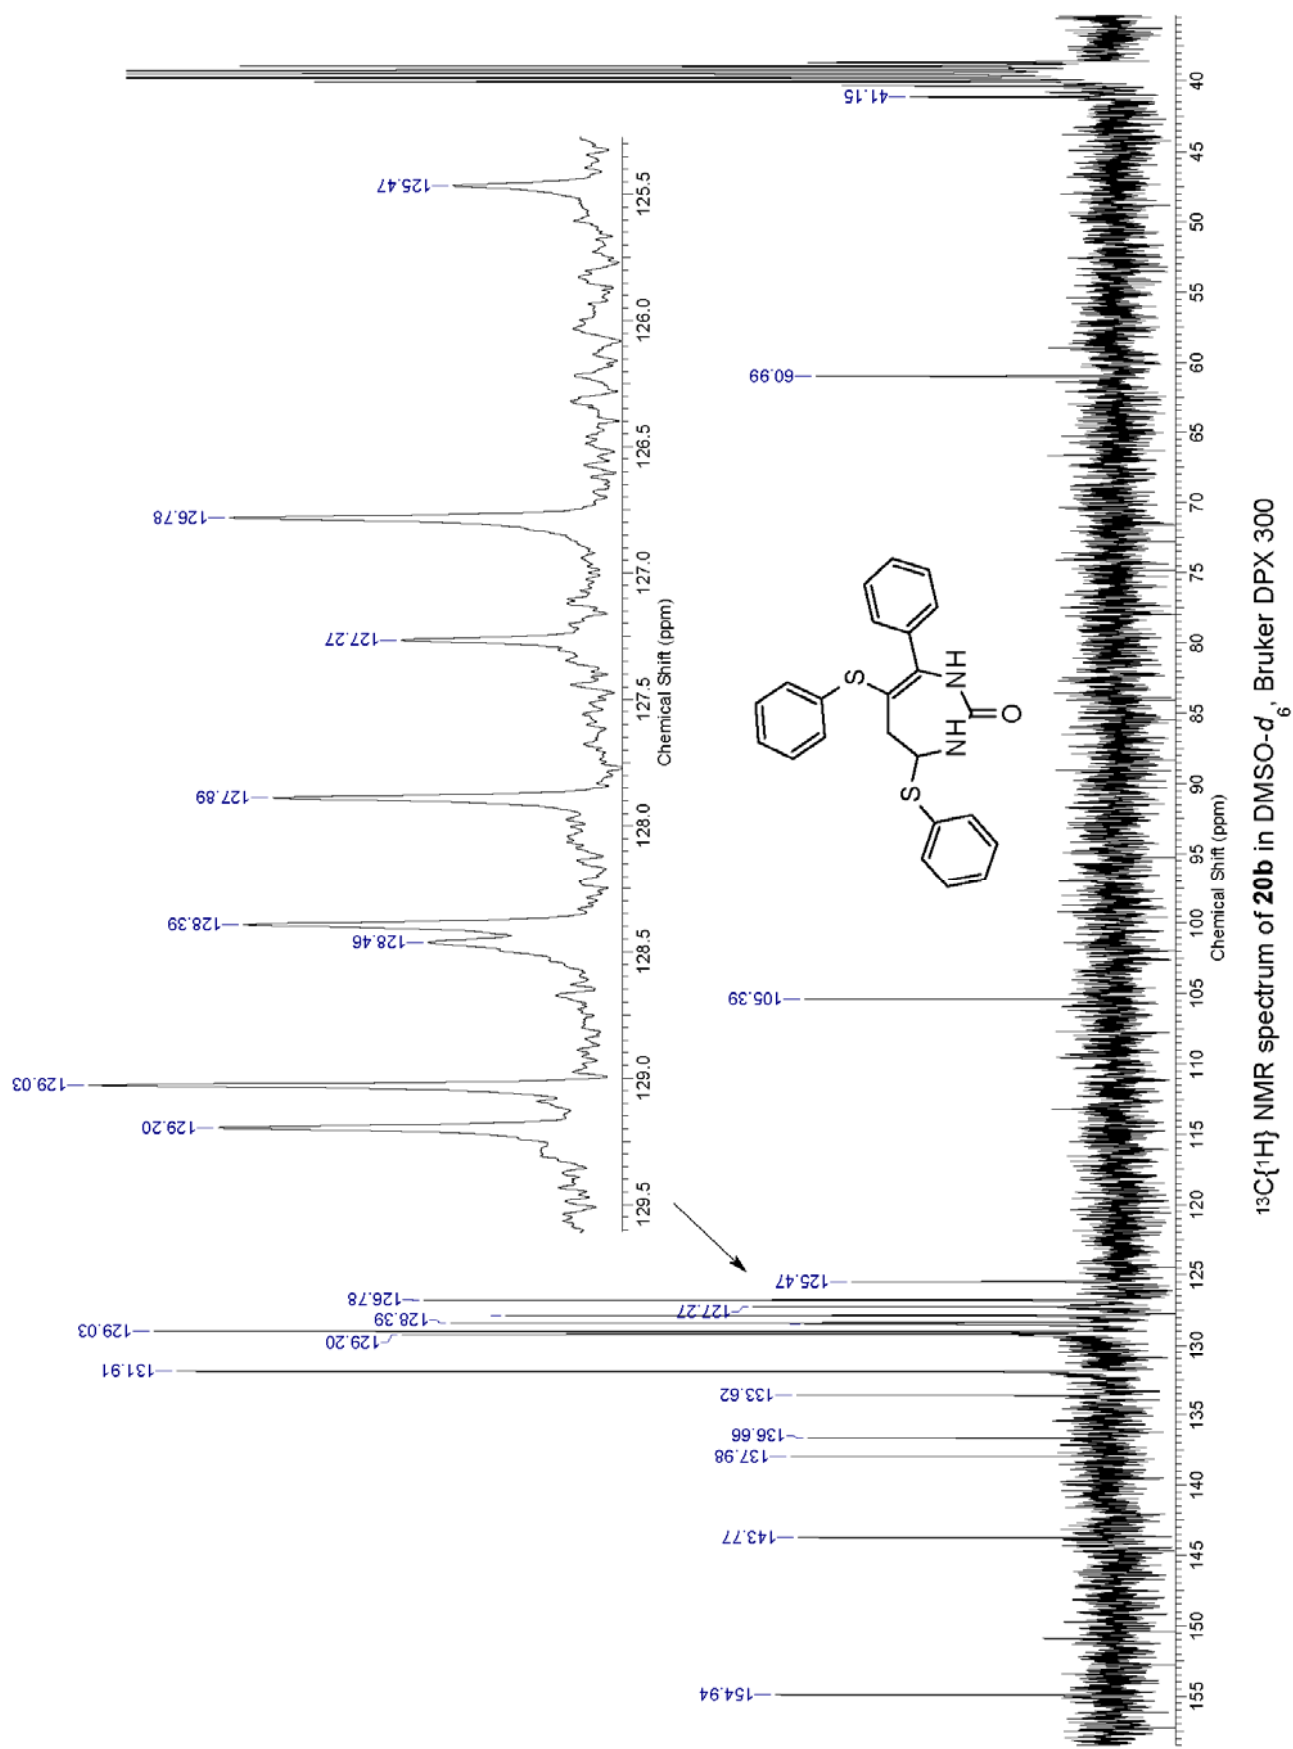

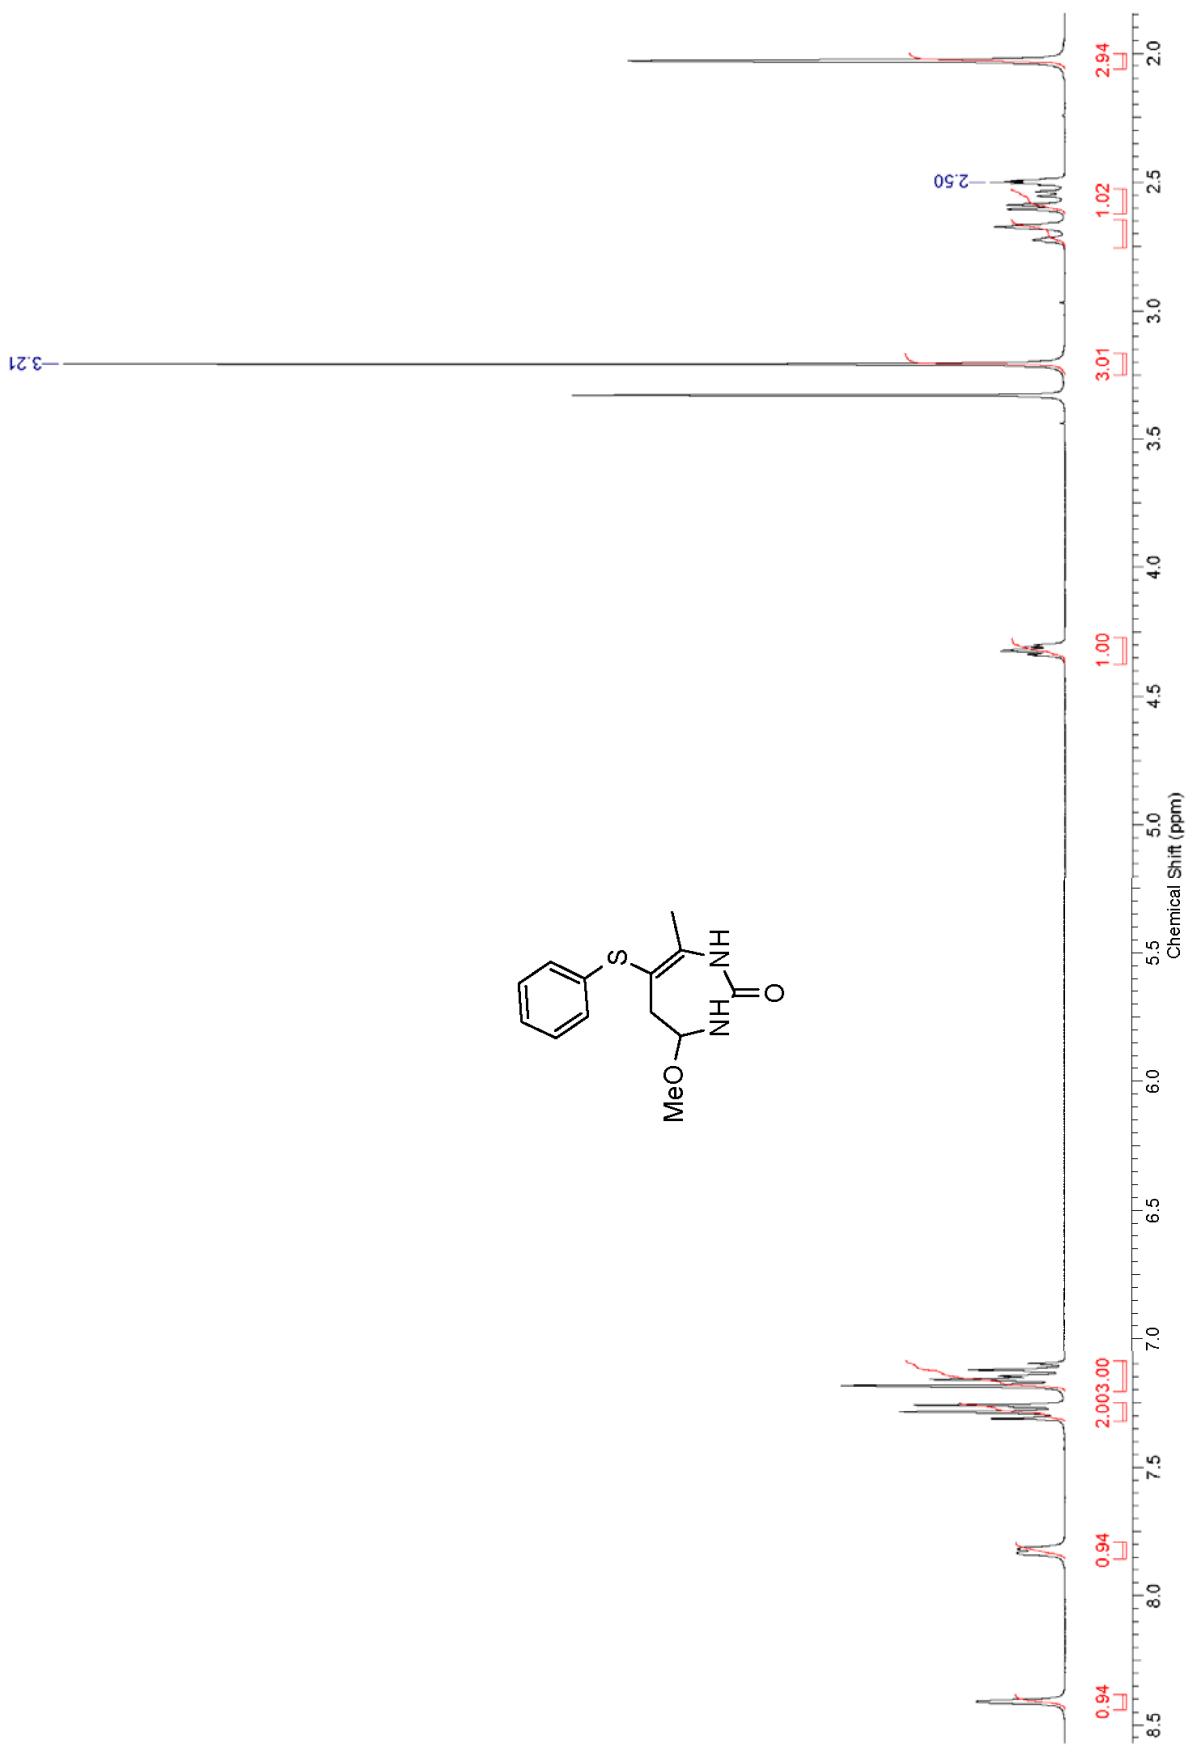

<sup>1</sup>H NMR spectrum of 24a in DMSO-d<sub>6</sub>, Bruker DPX 300

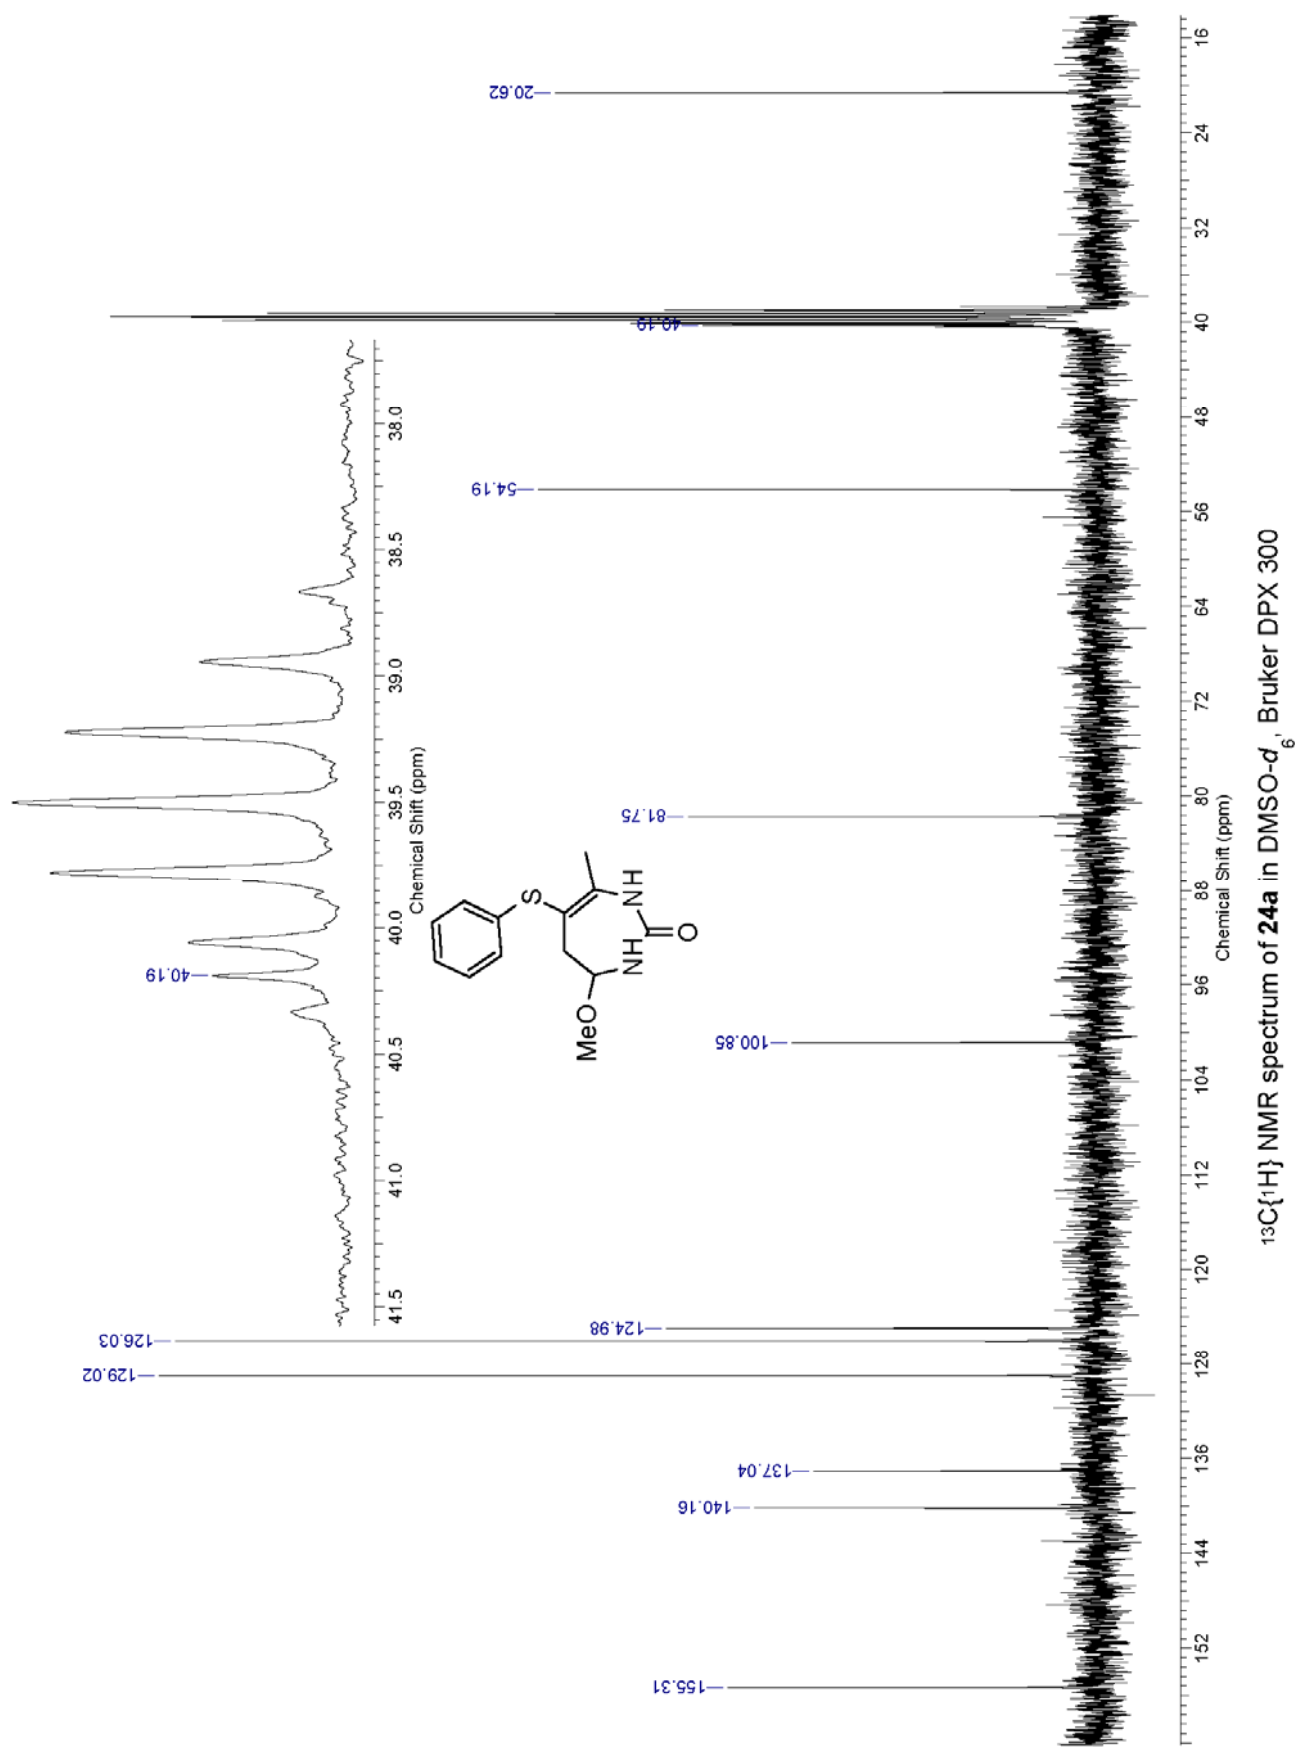

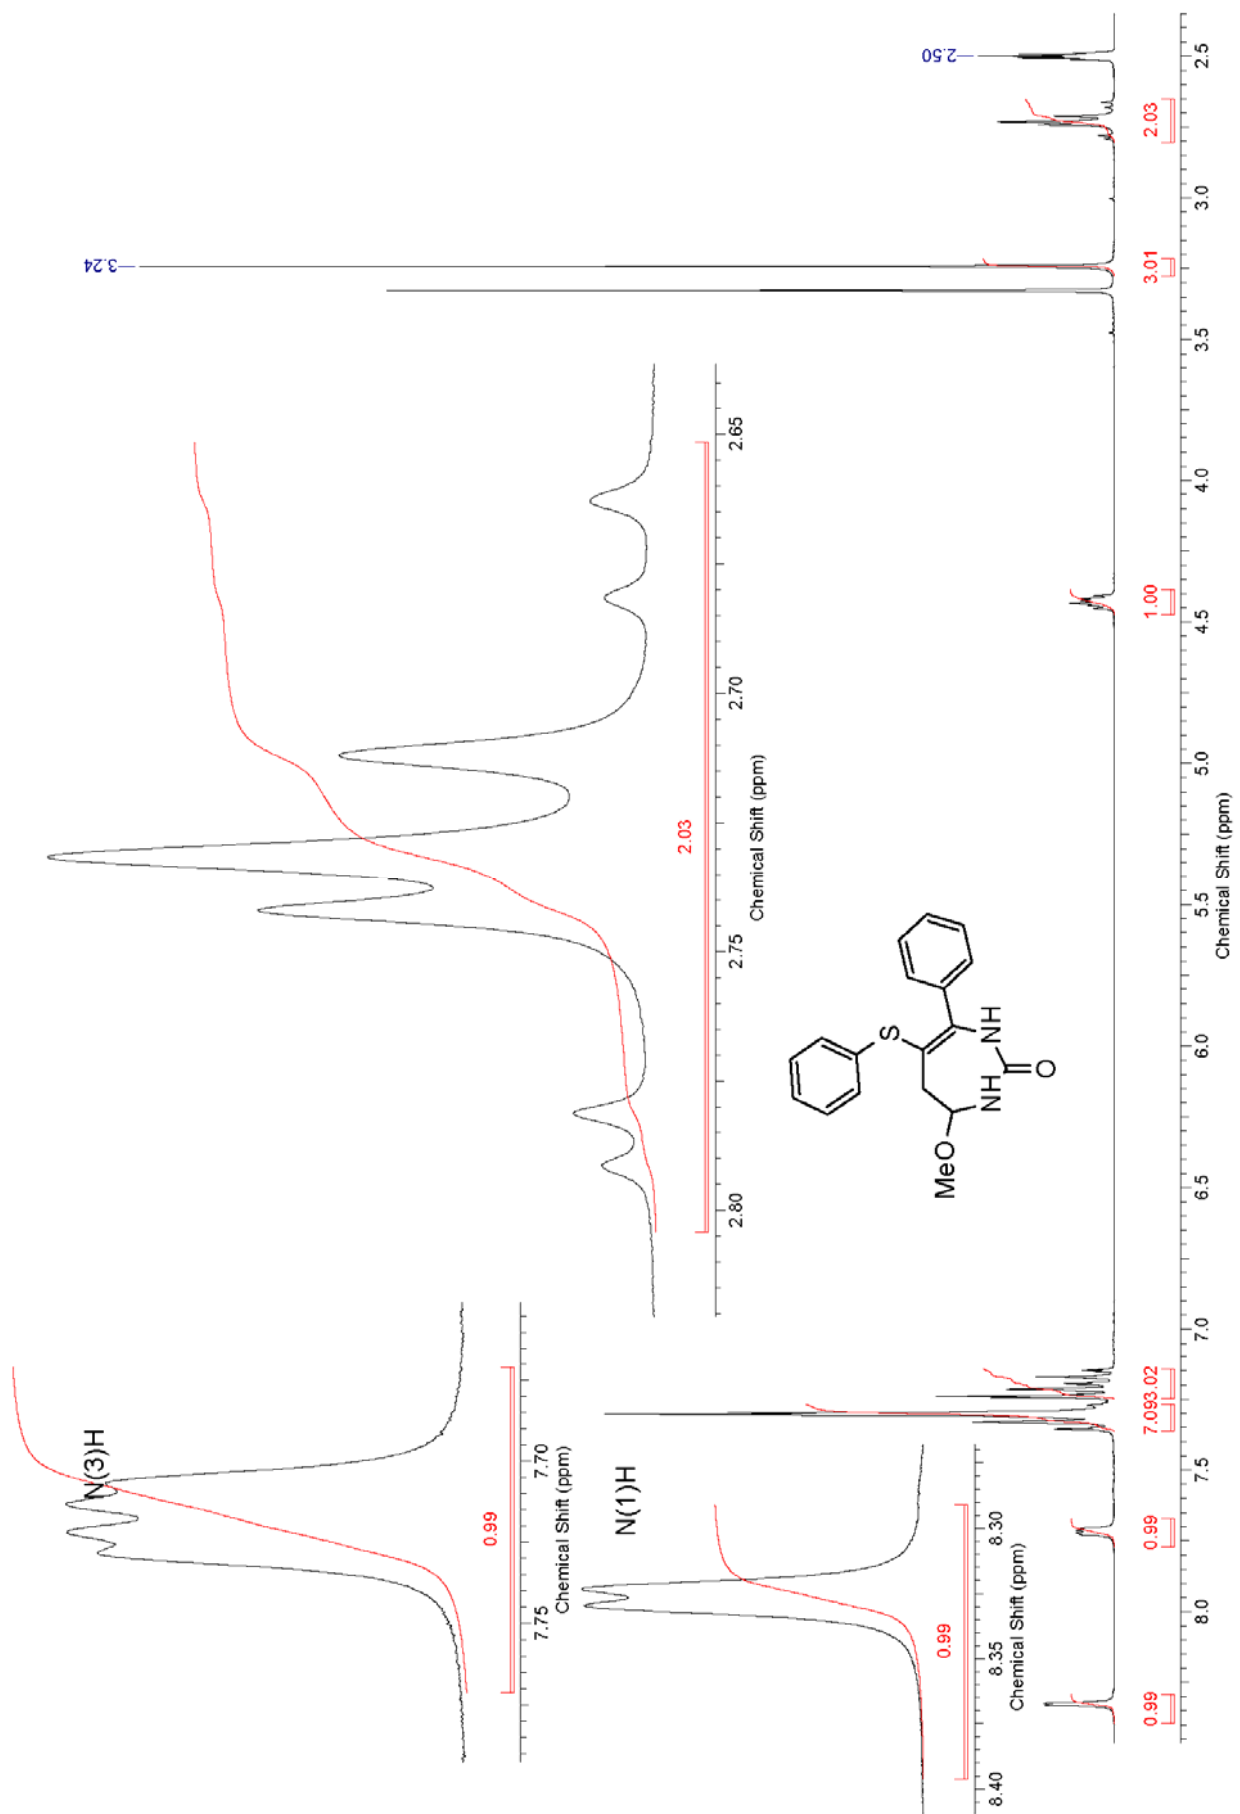

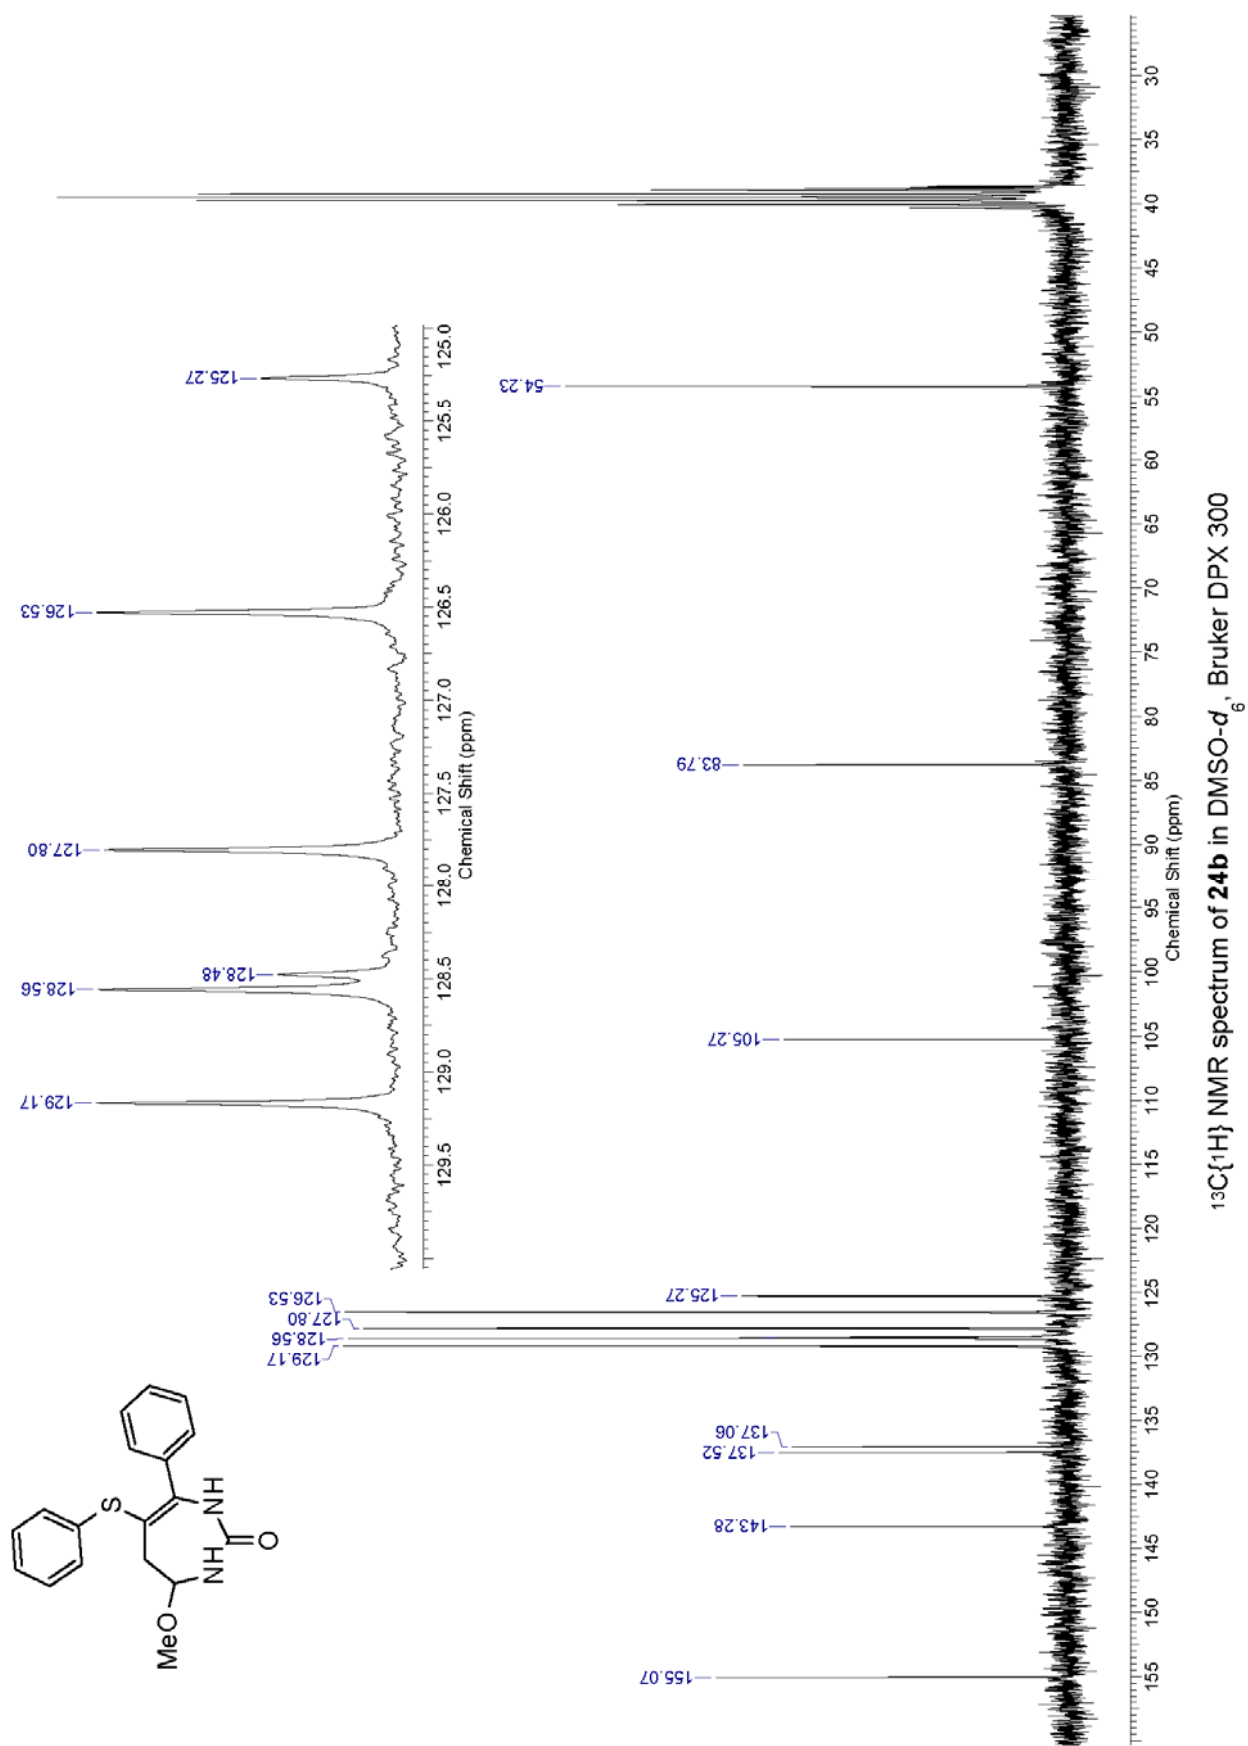

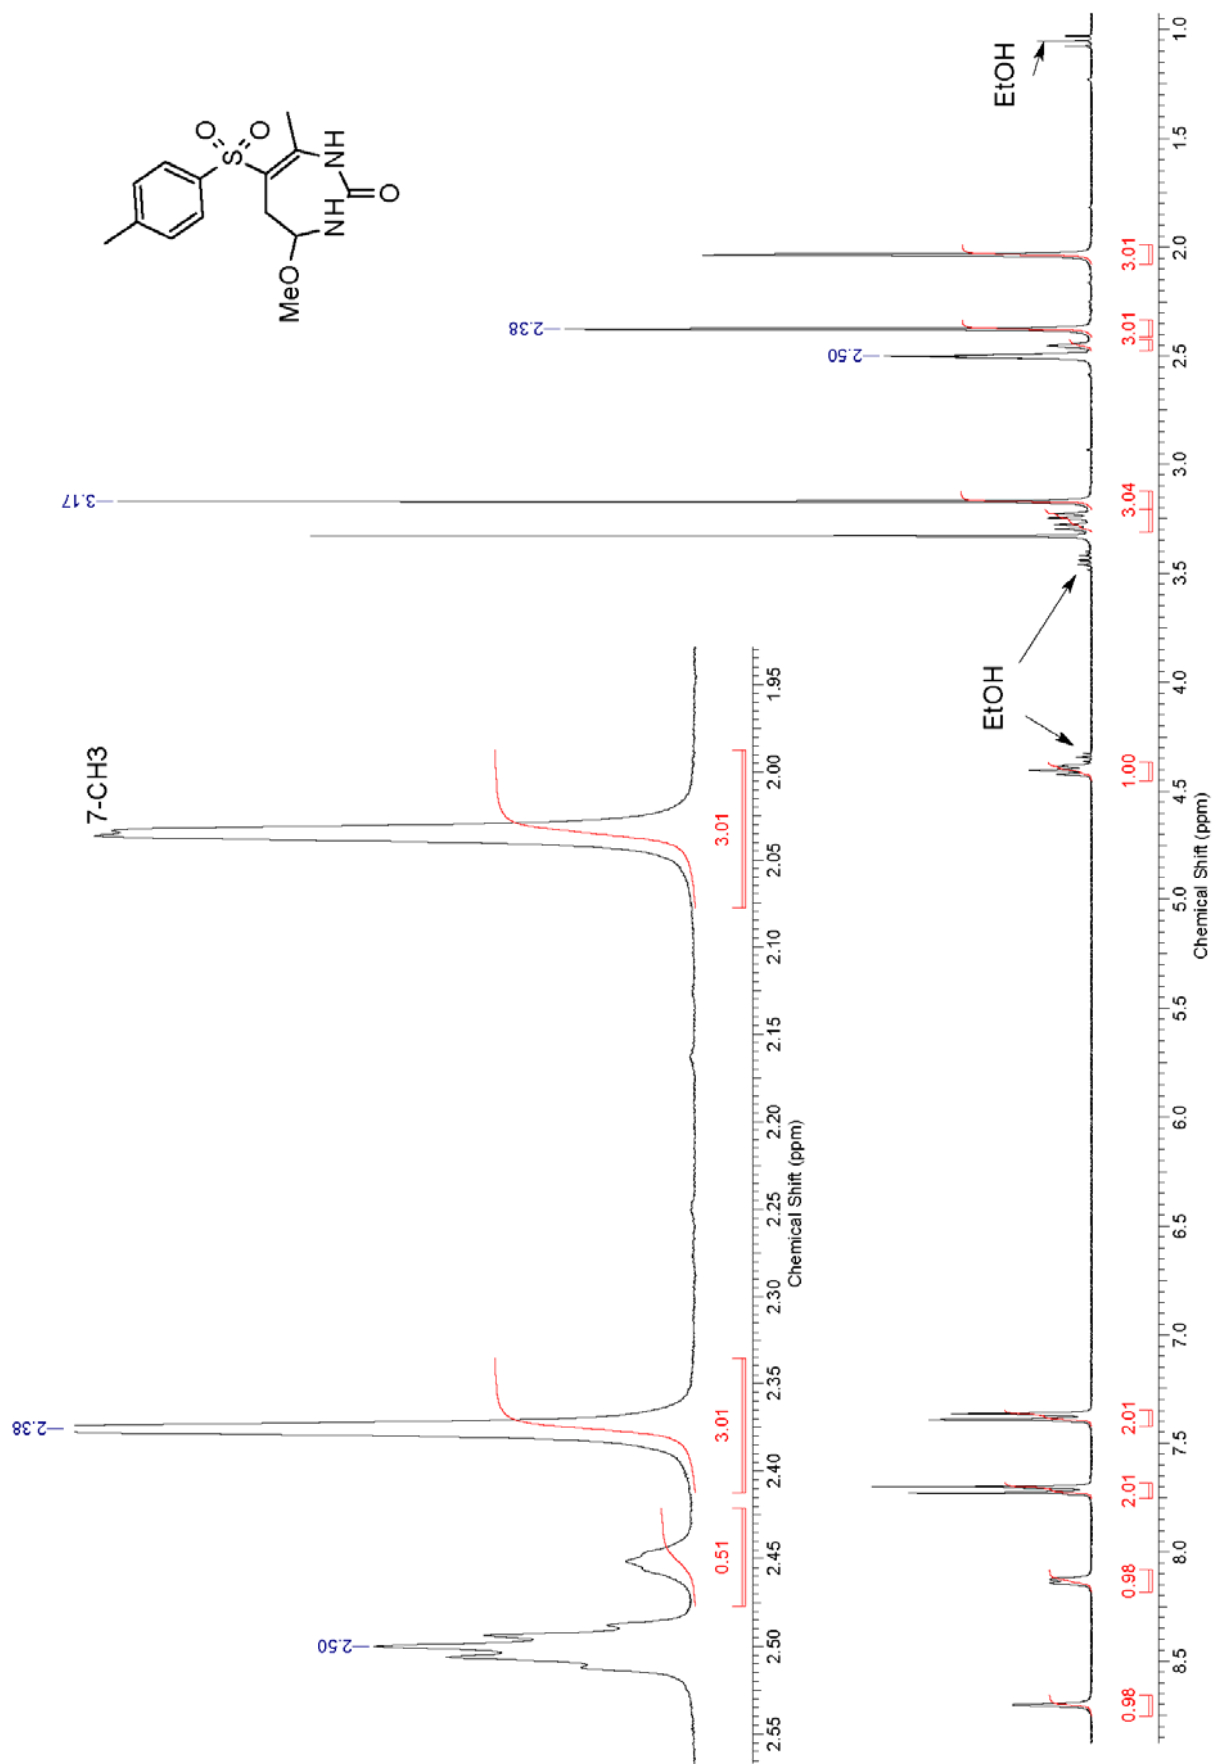

$^1\text{H}$  NMR spectrum of **24c** in  $\text{DMSO-}d_6$ , Bruker DPX 300



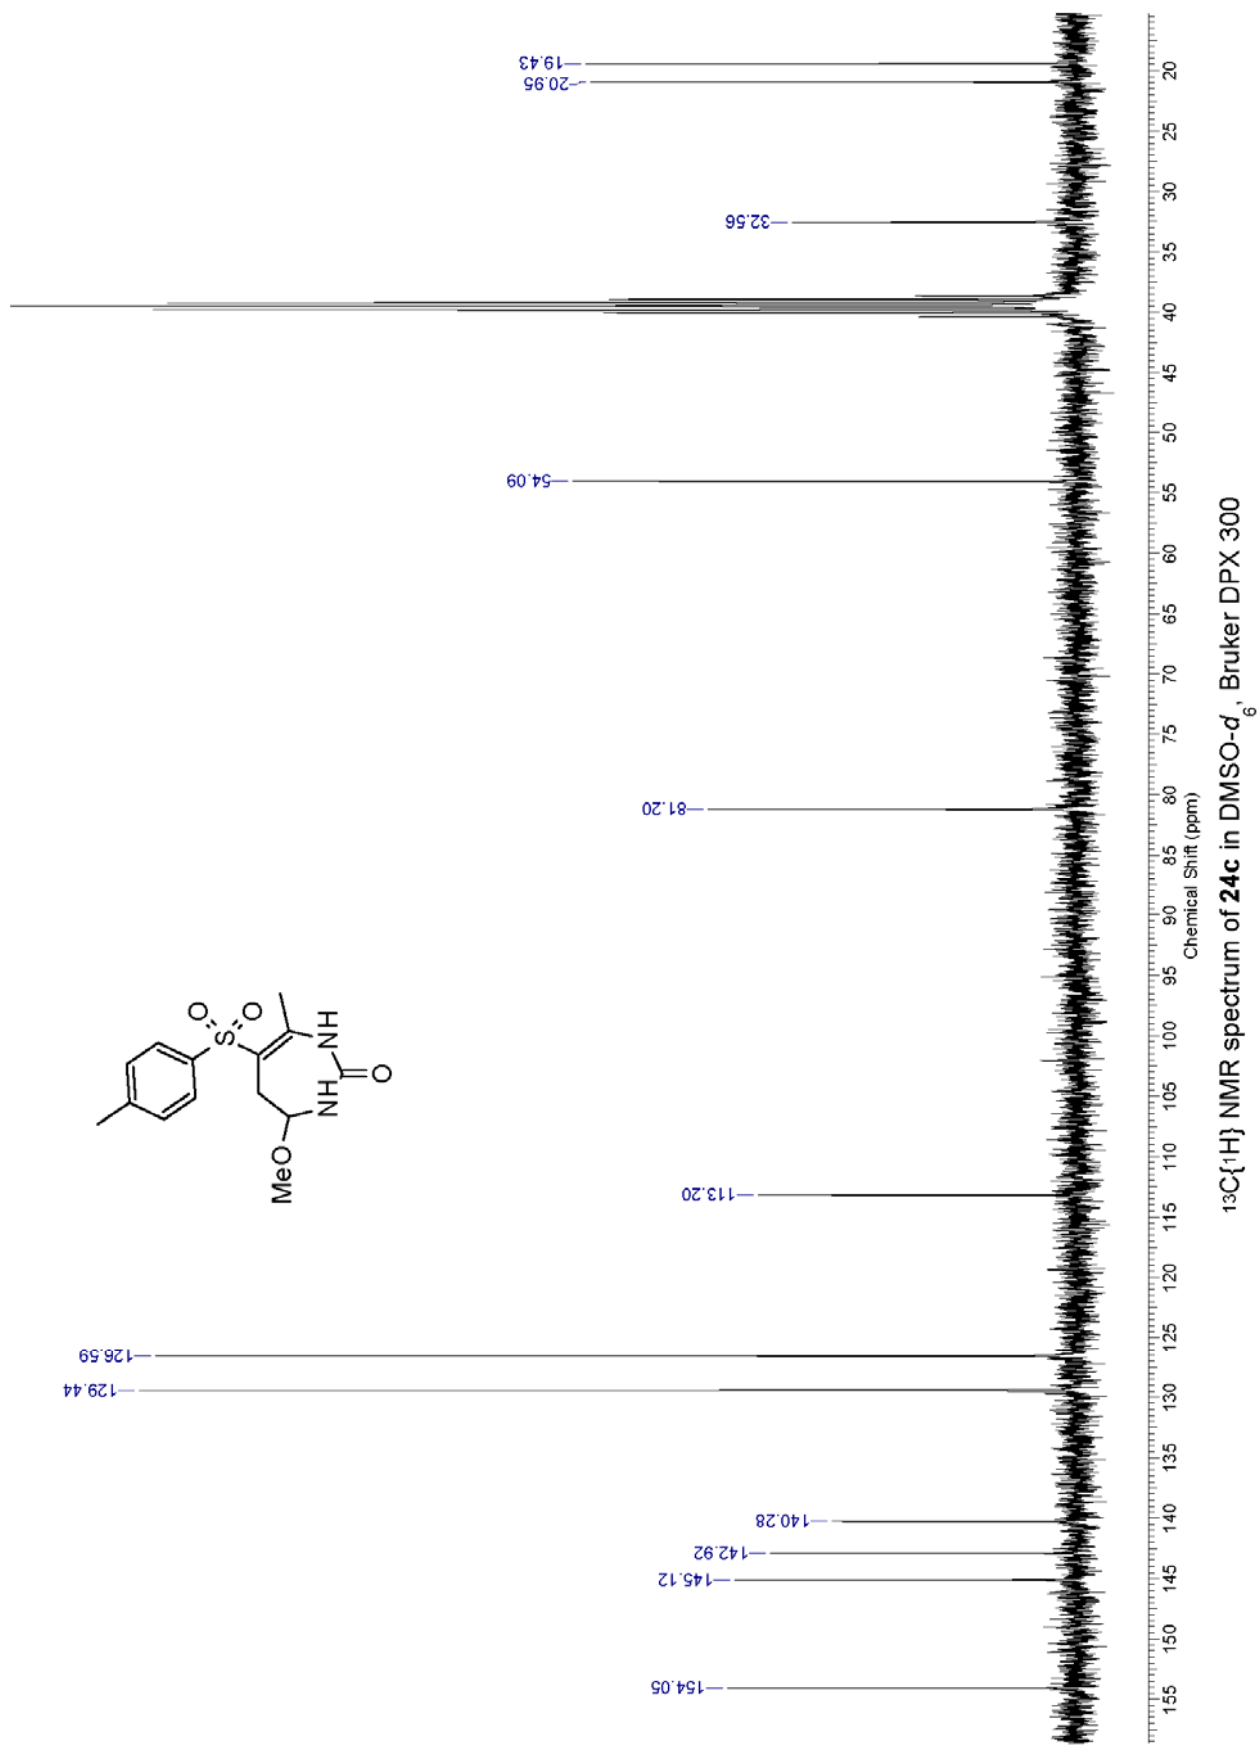

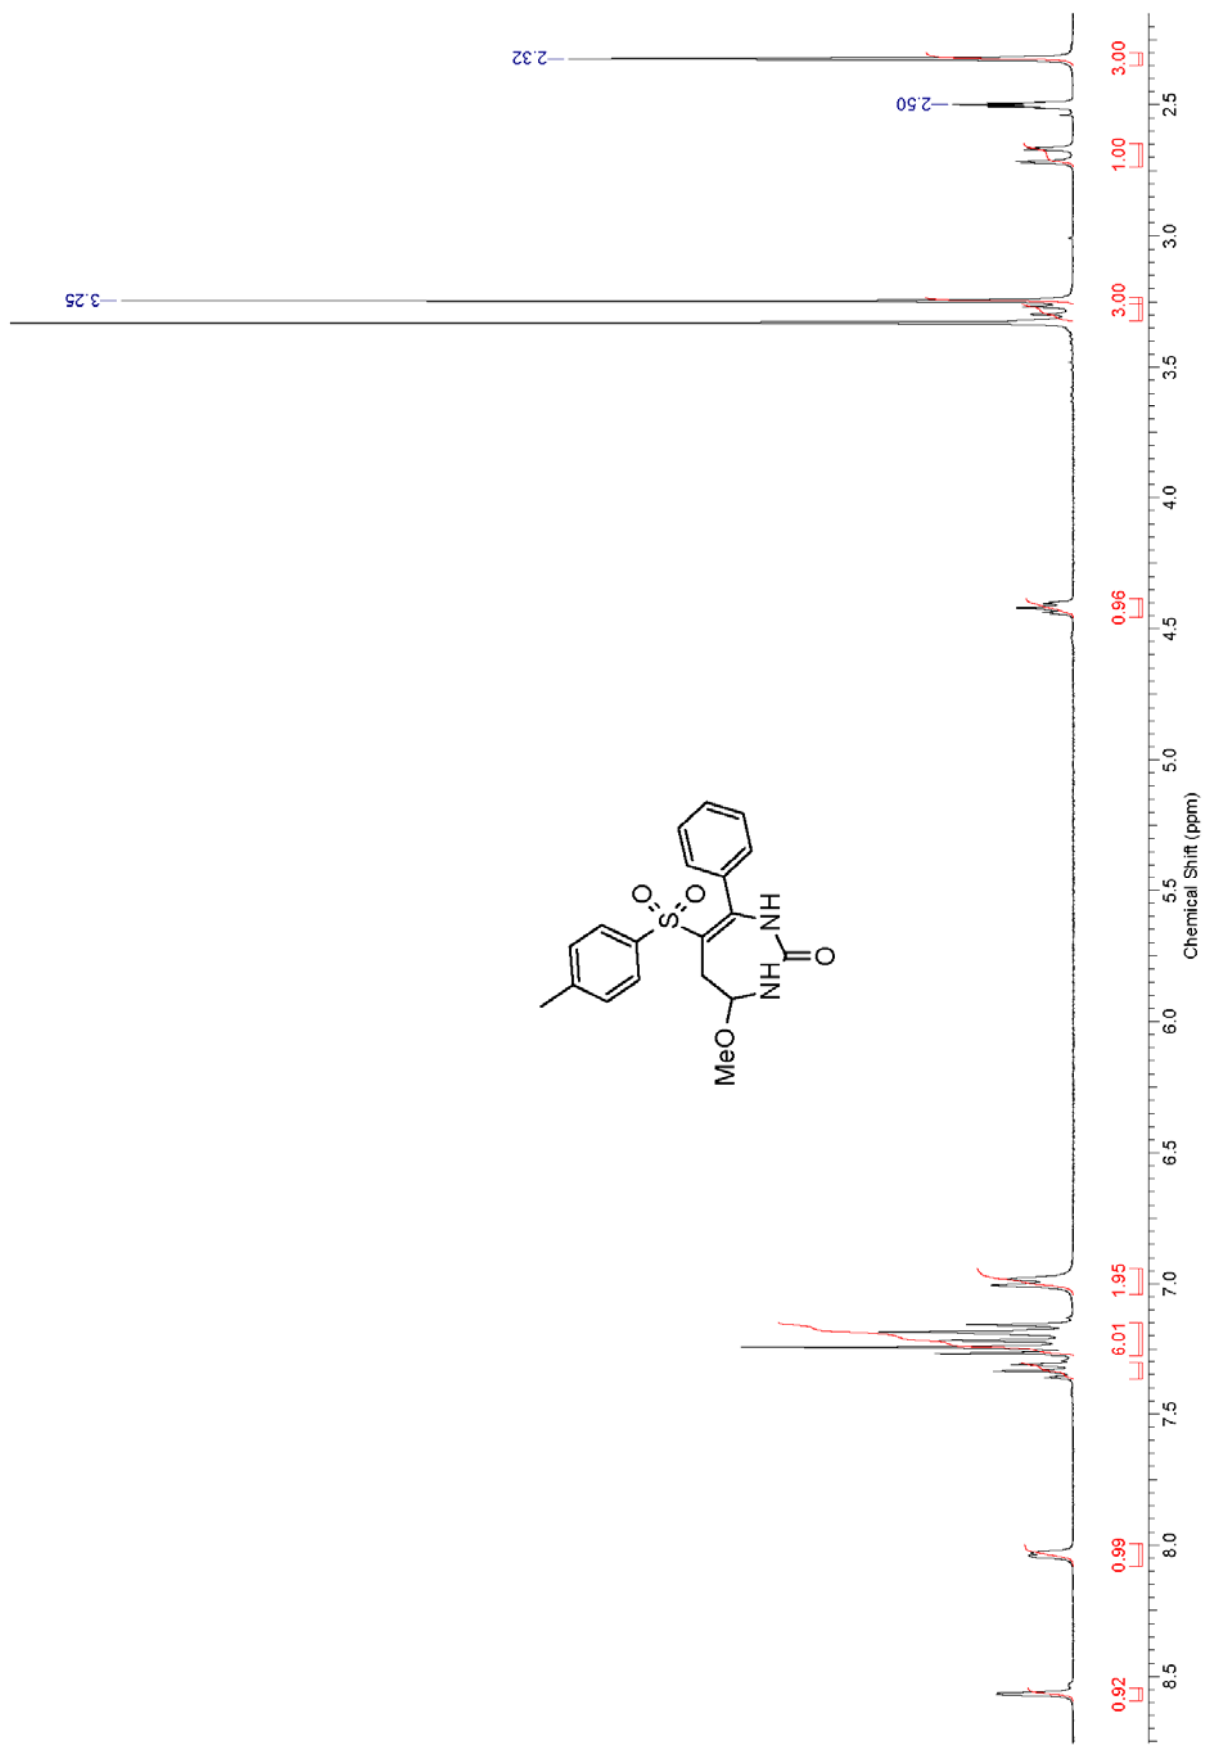

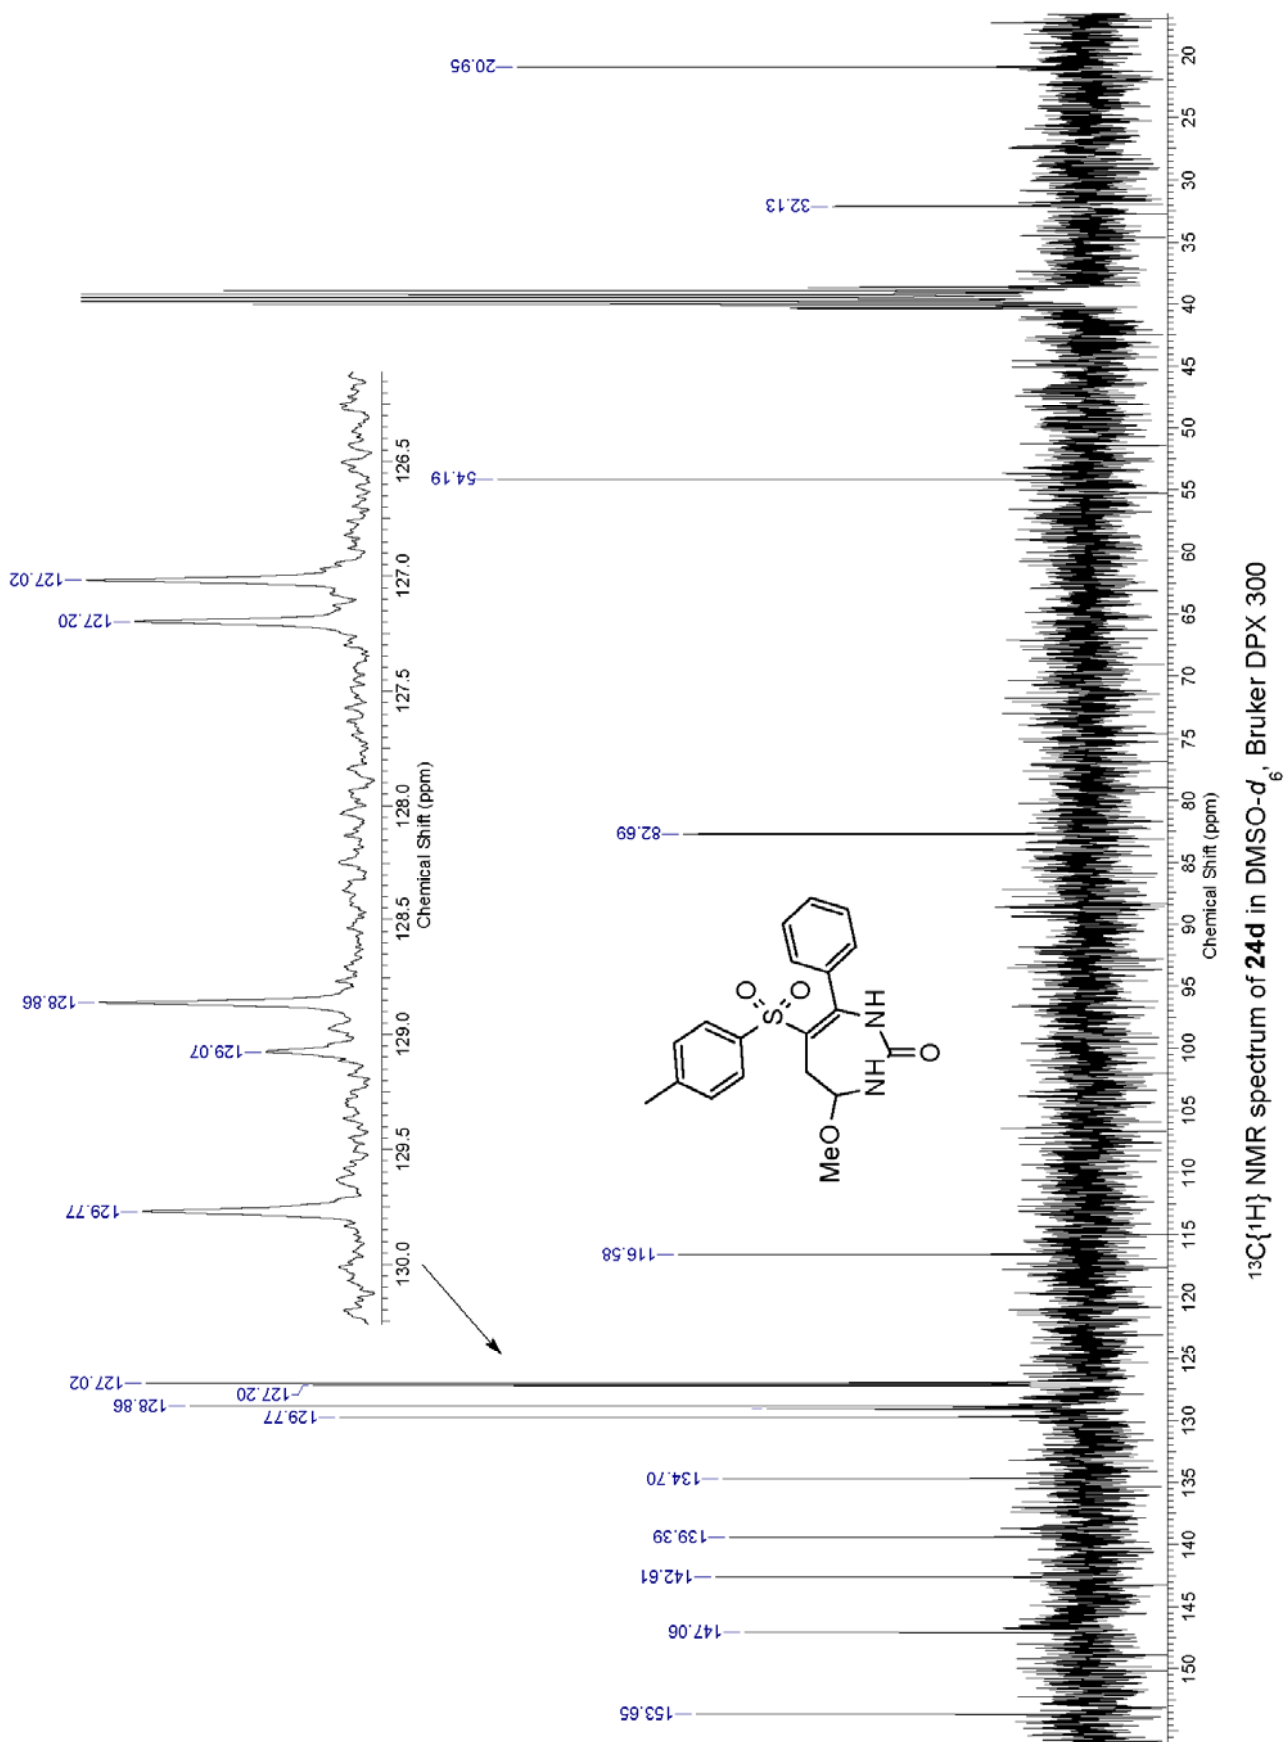

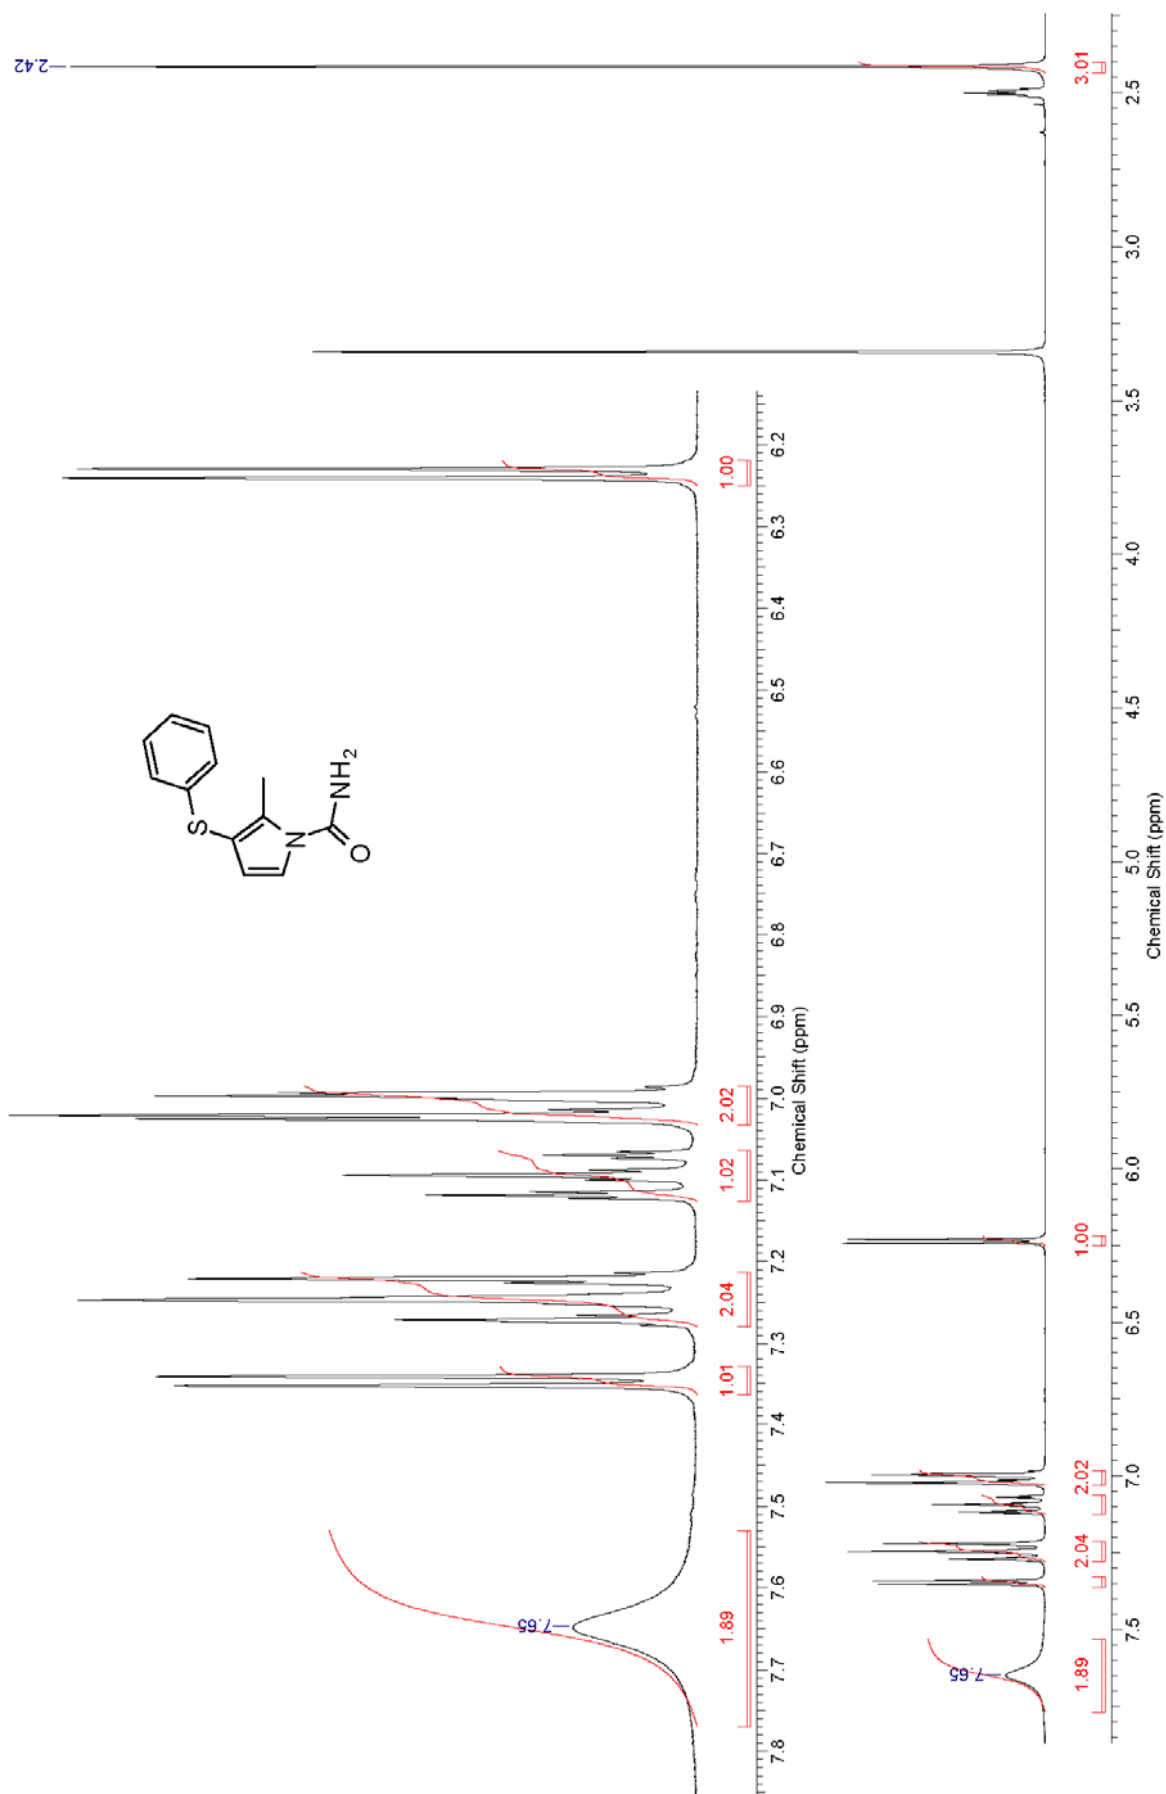

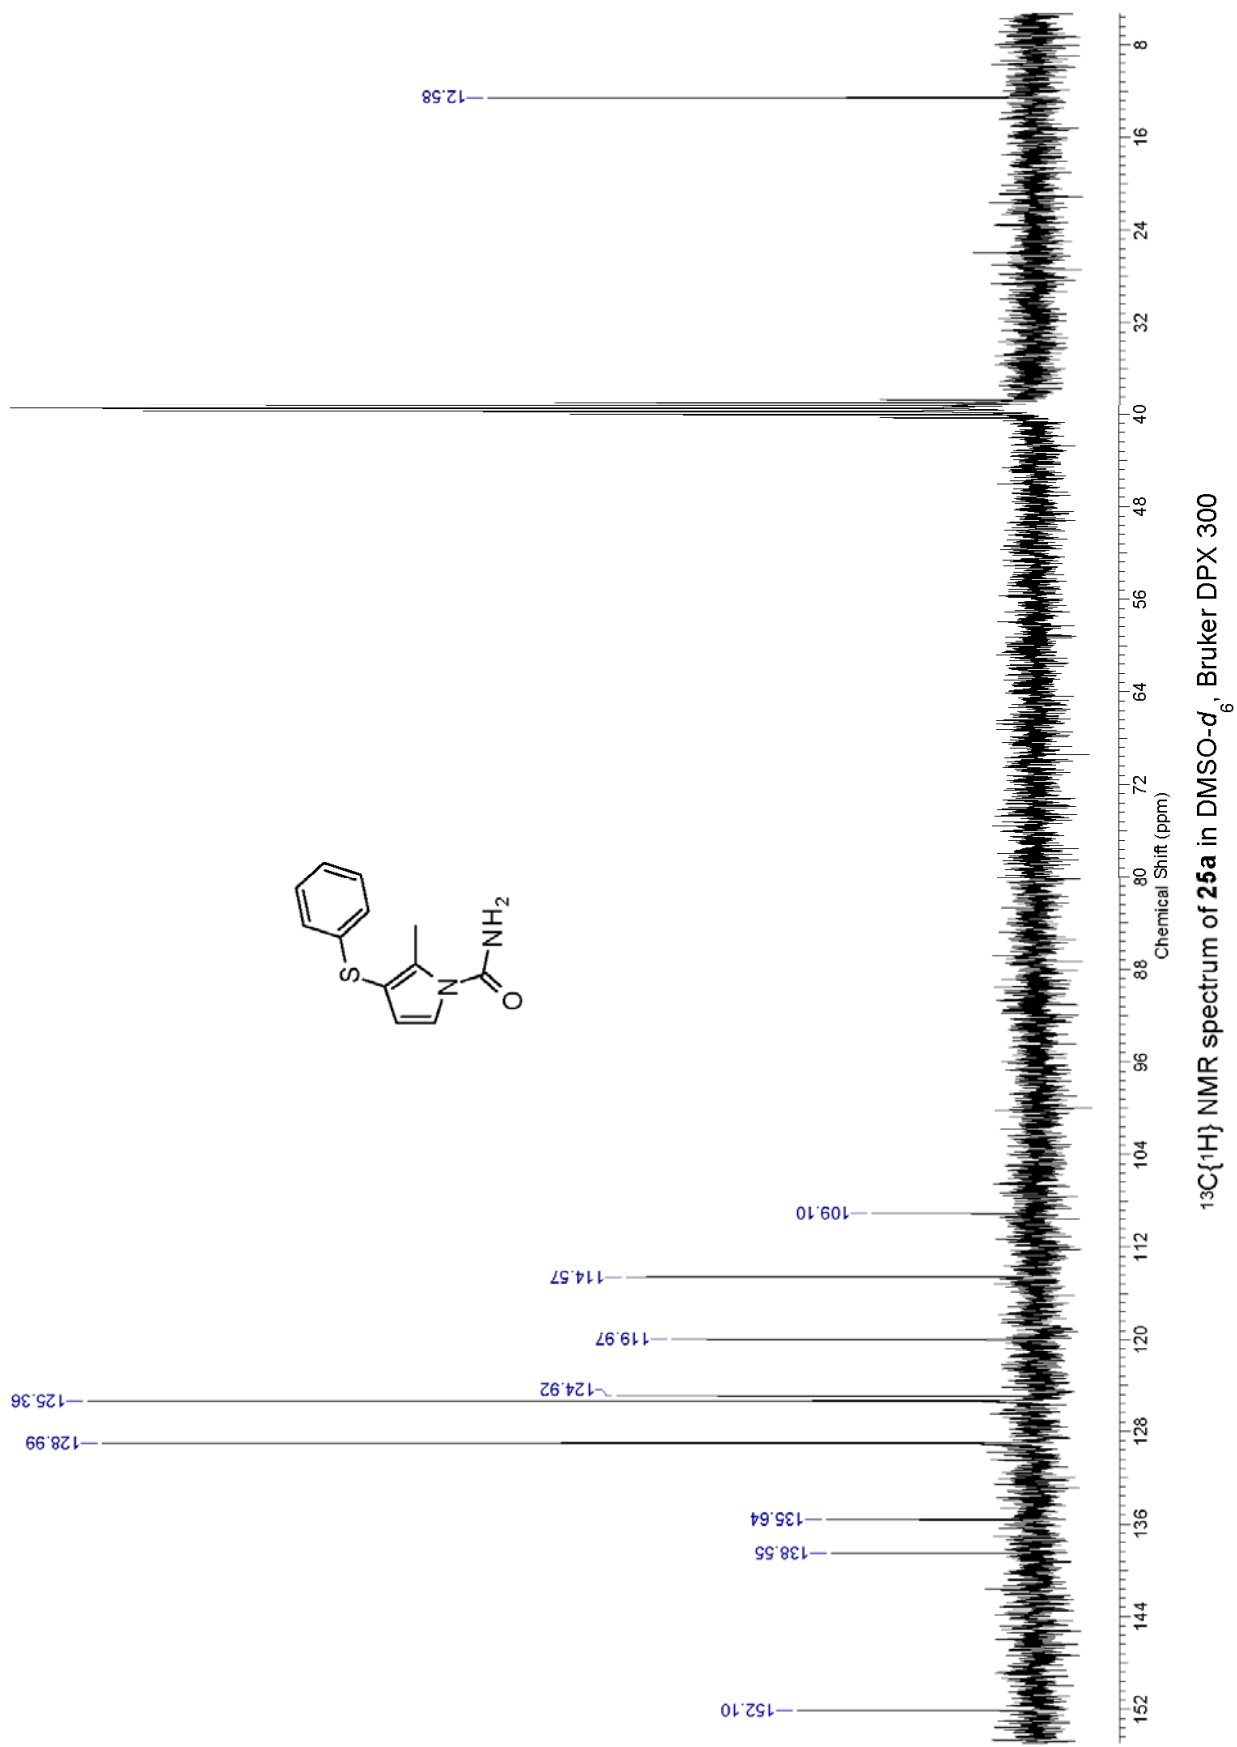

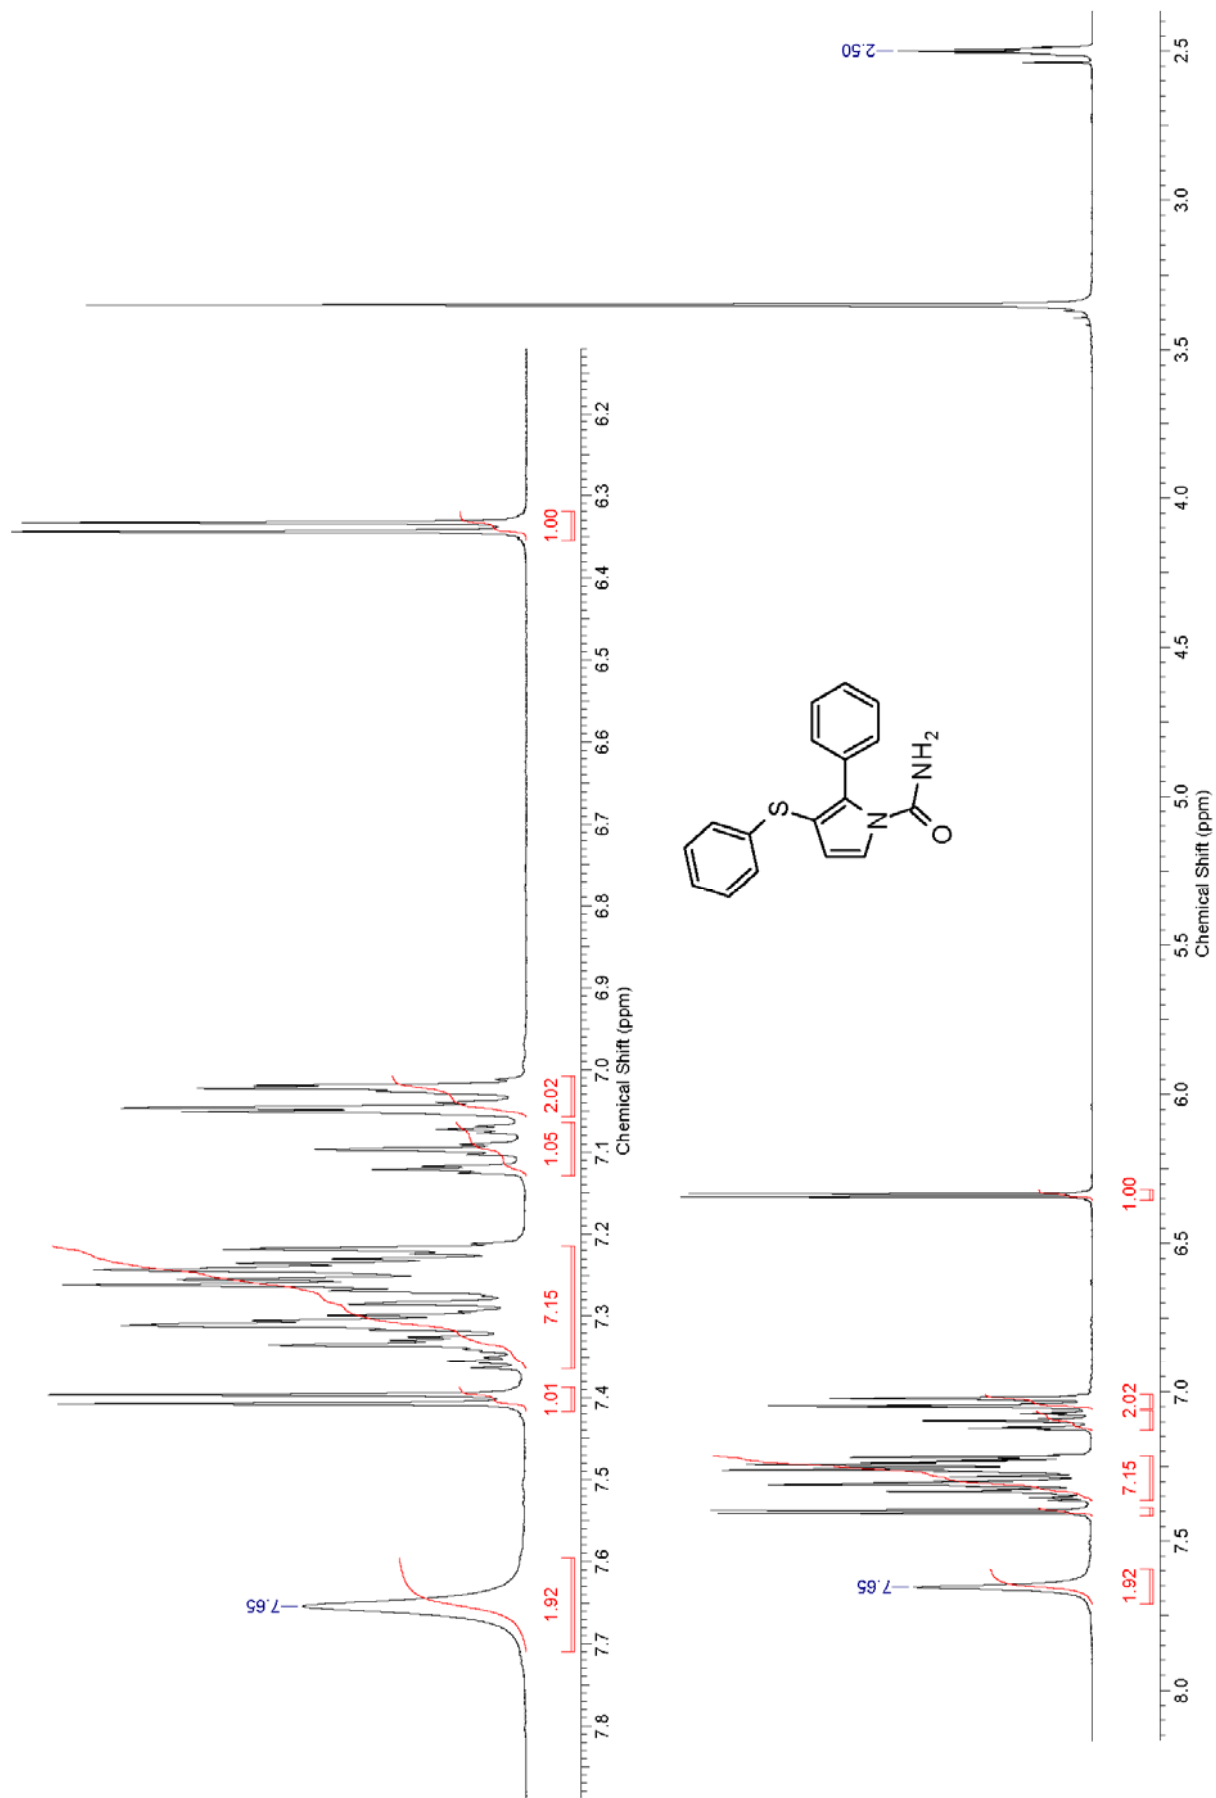

<sup>1</sup>H NMR spectrum of **25b** in DMSO-*d*<sub>6</sub>, Bruker DPX 300

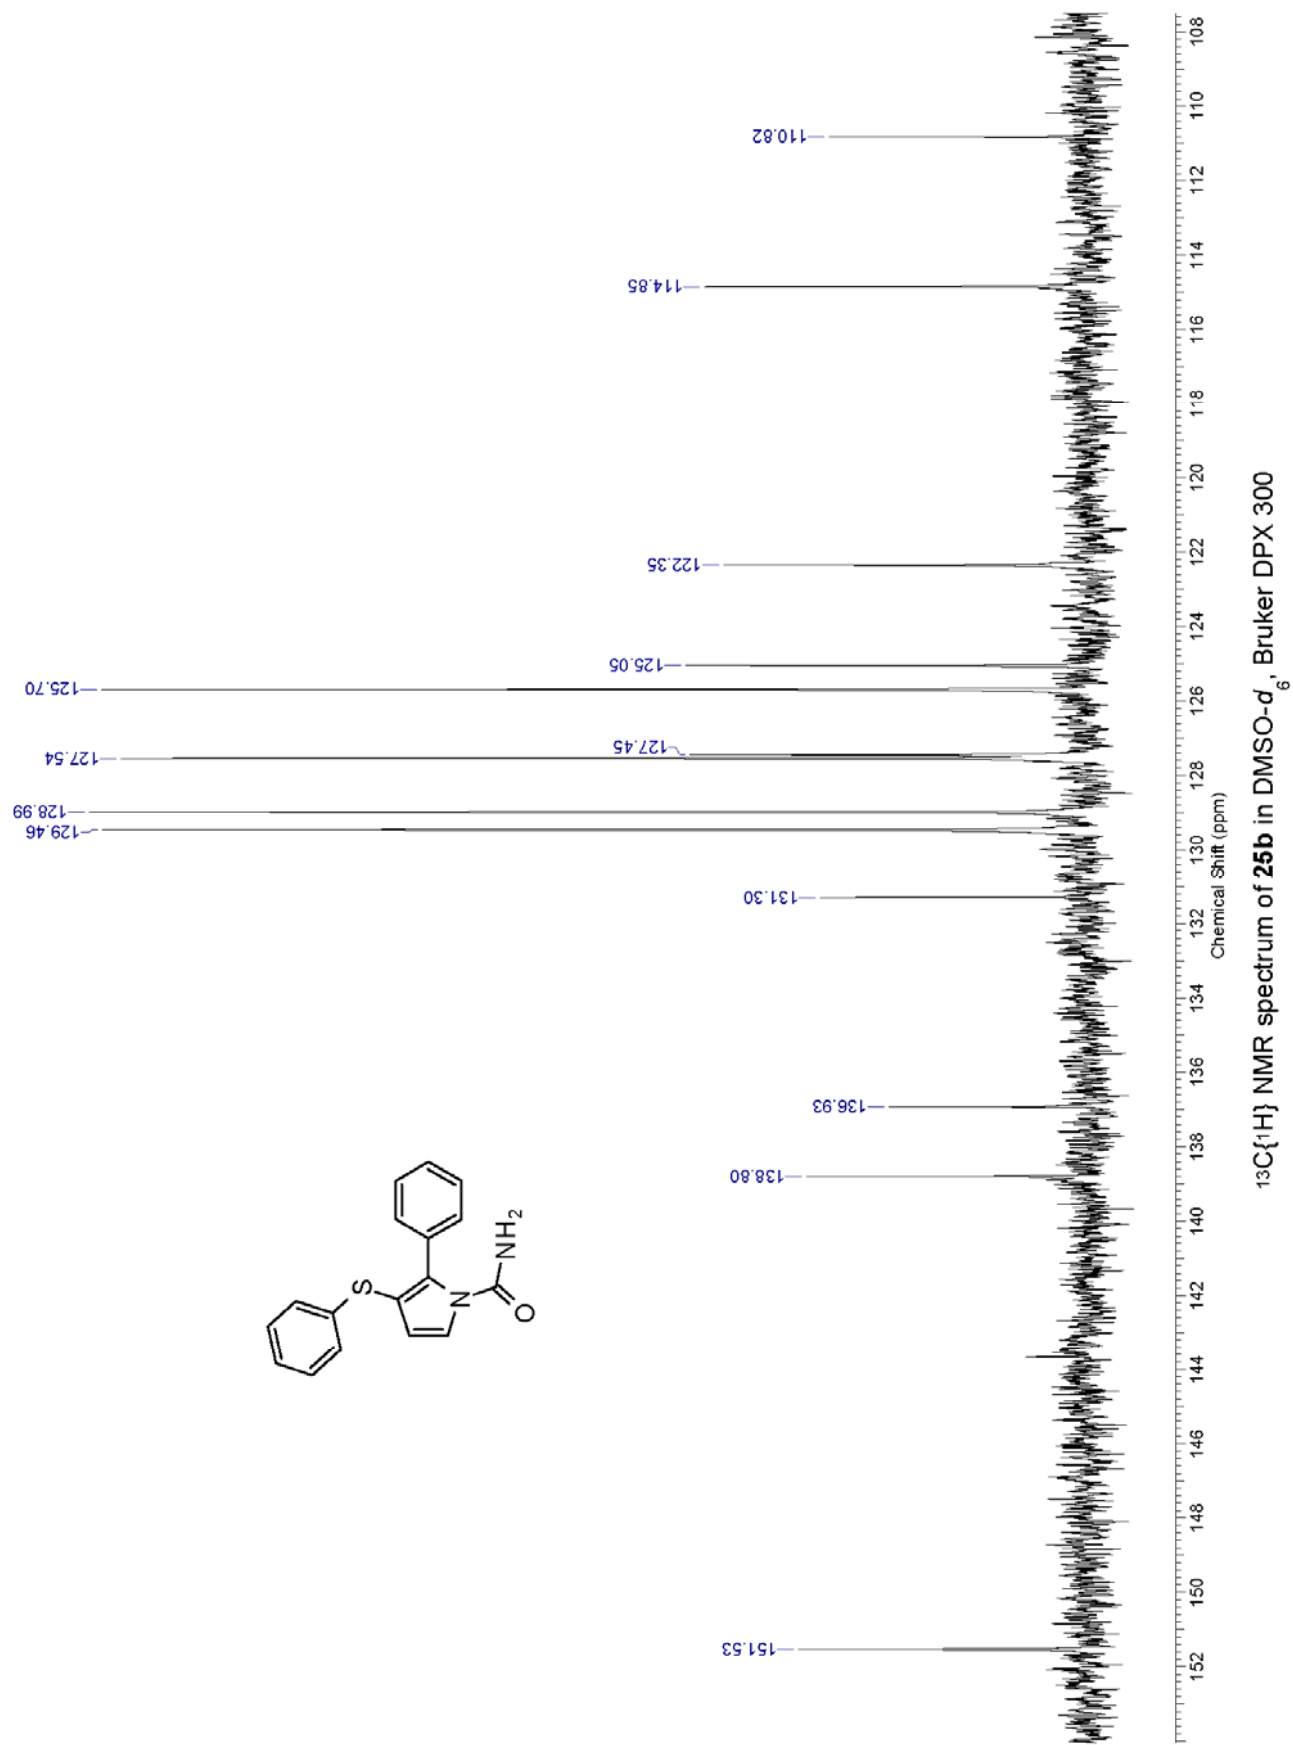

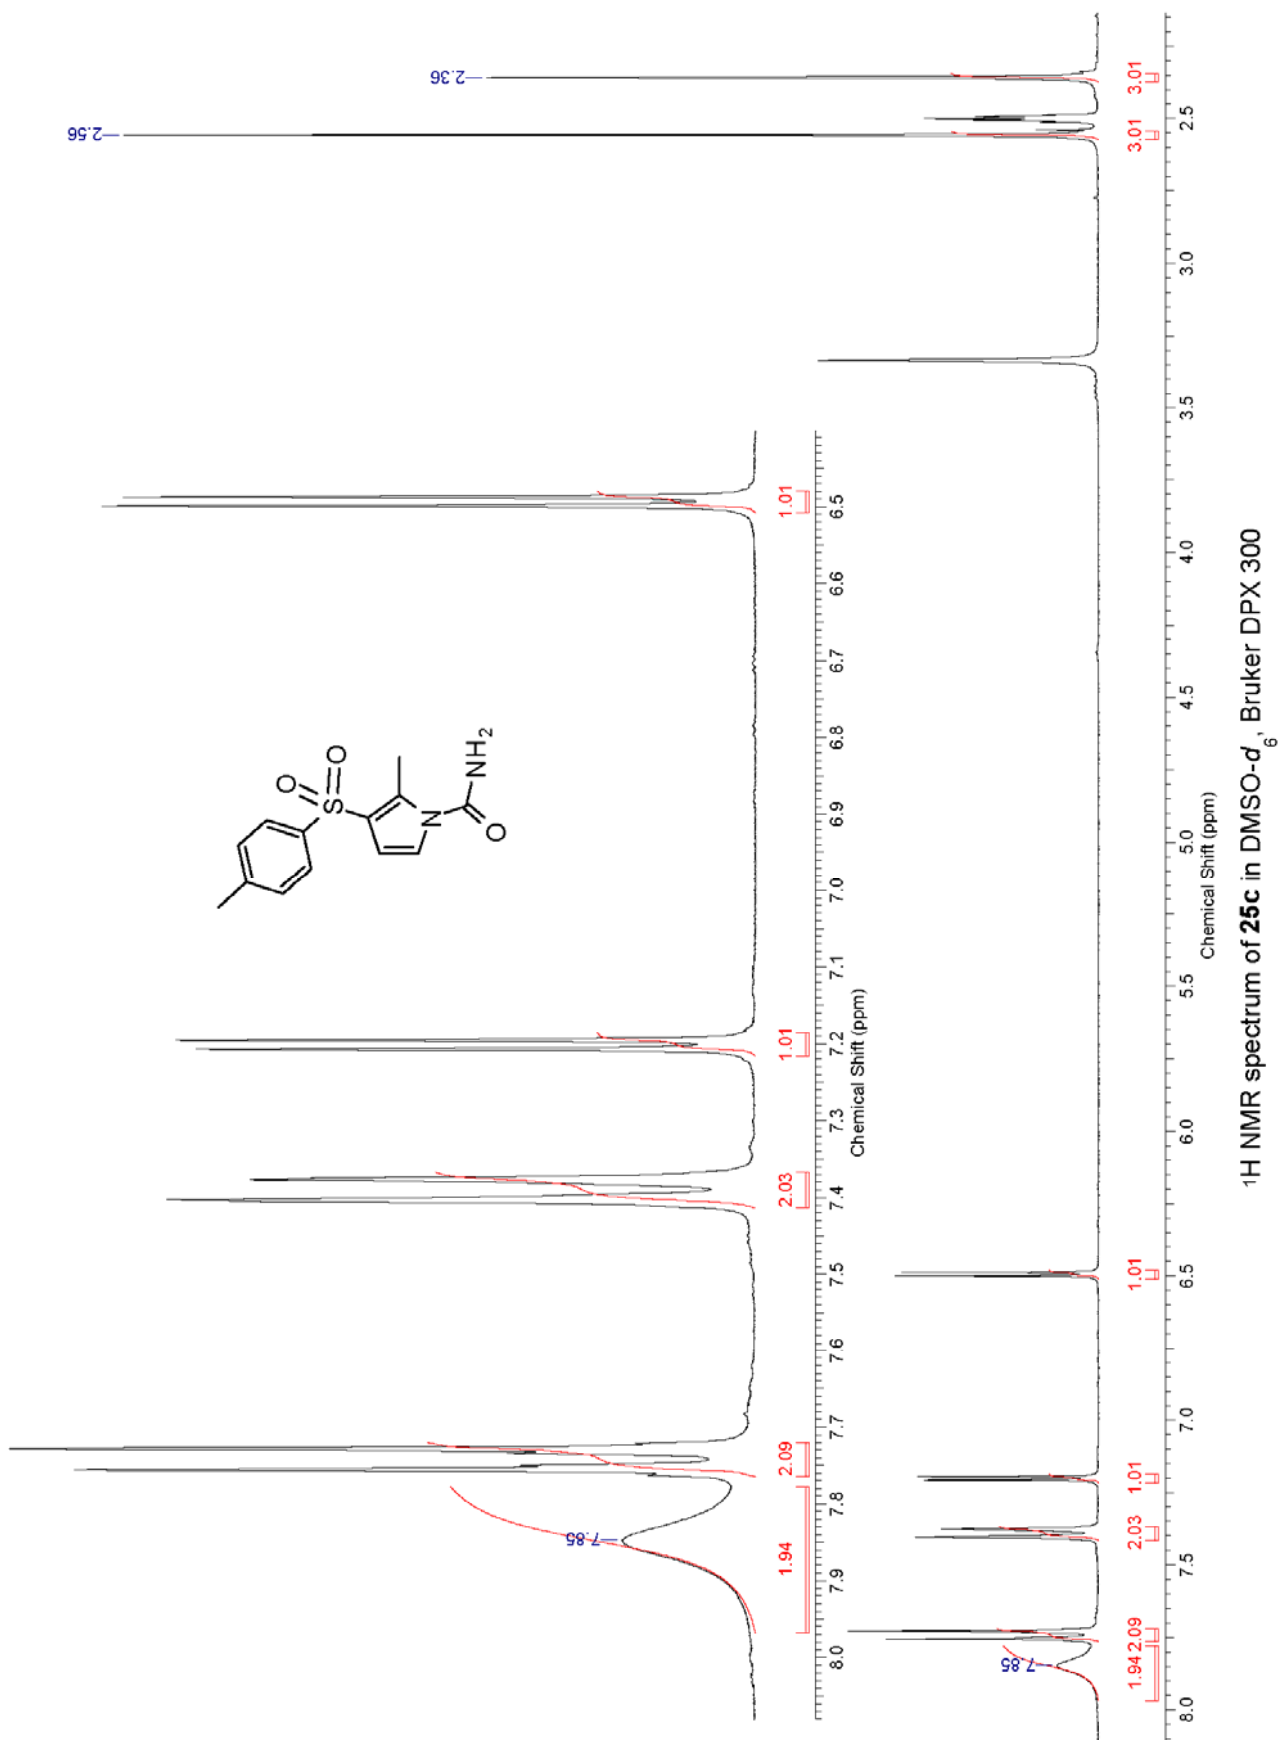



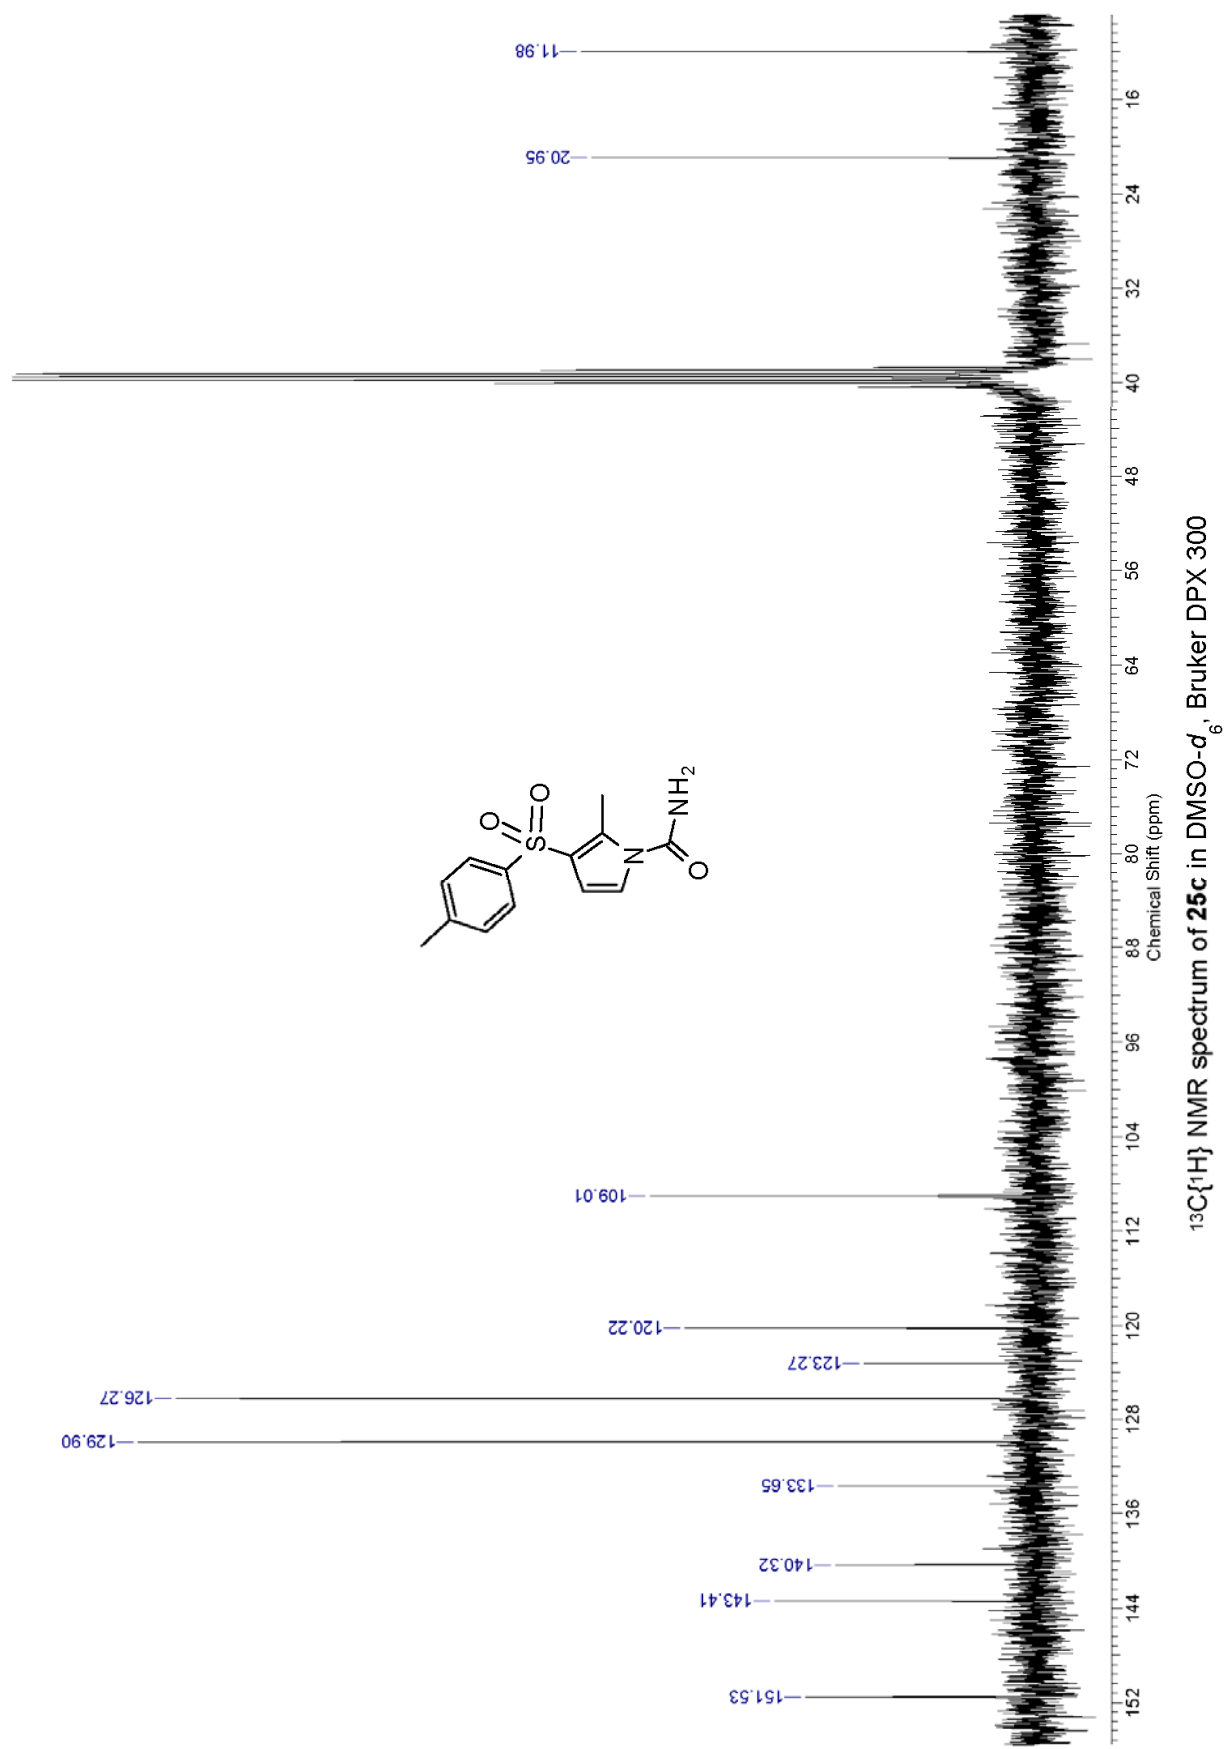

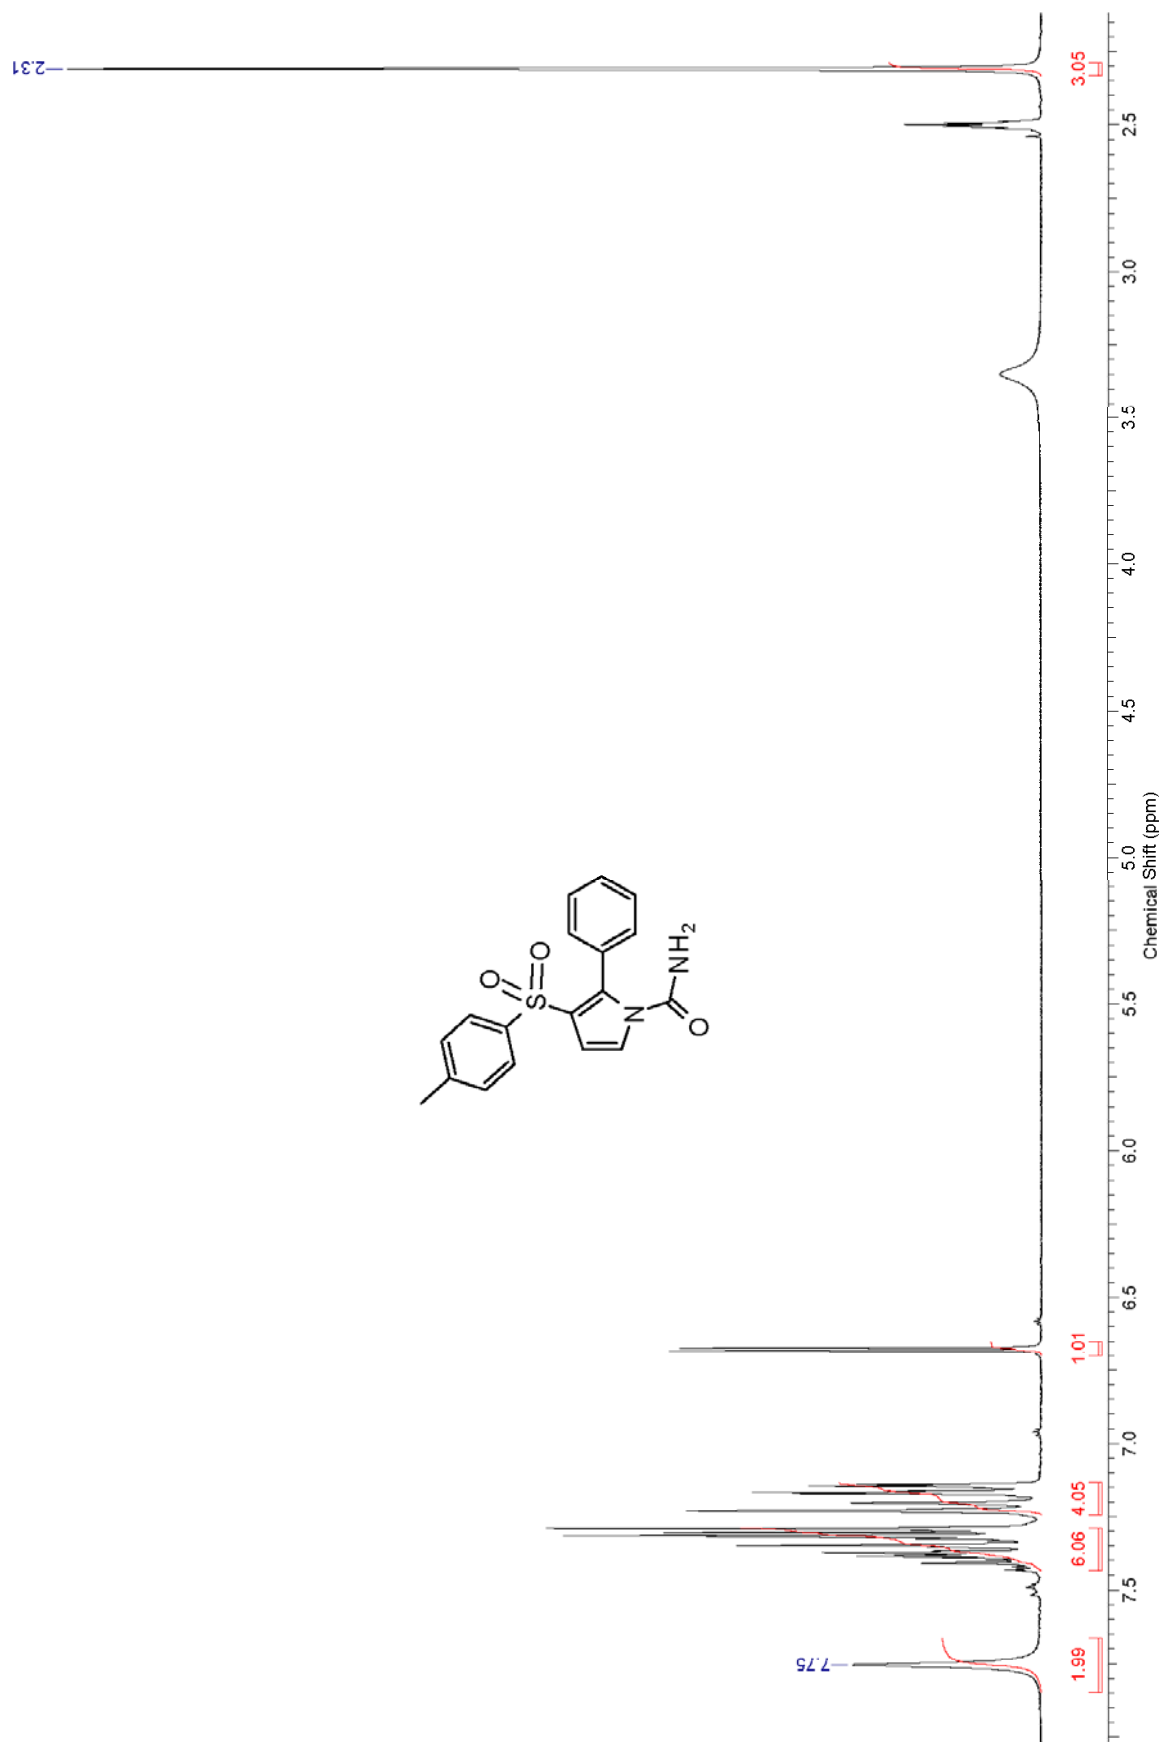

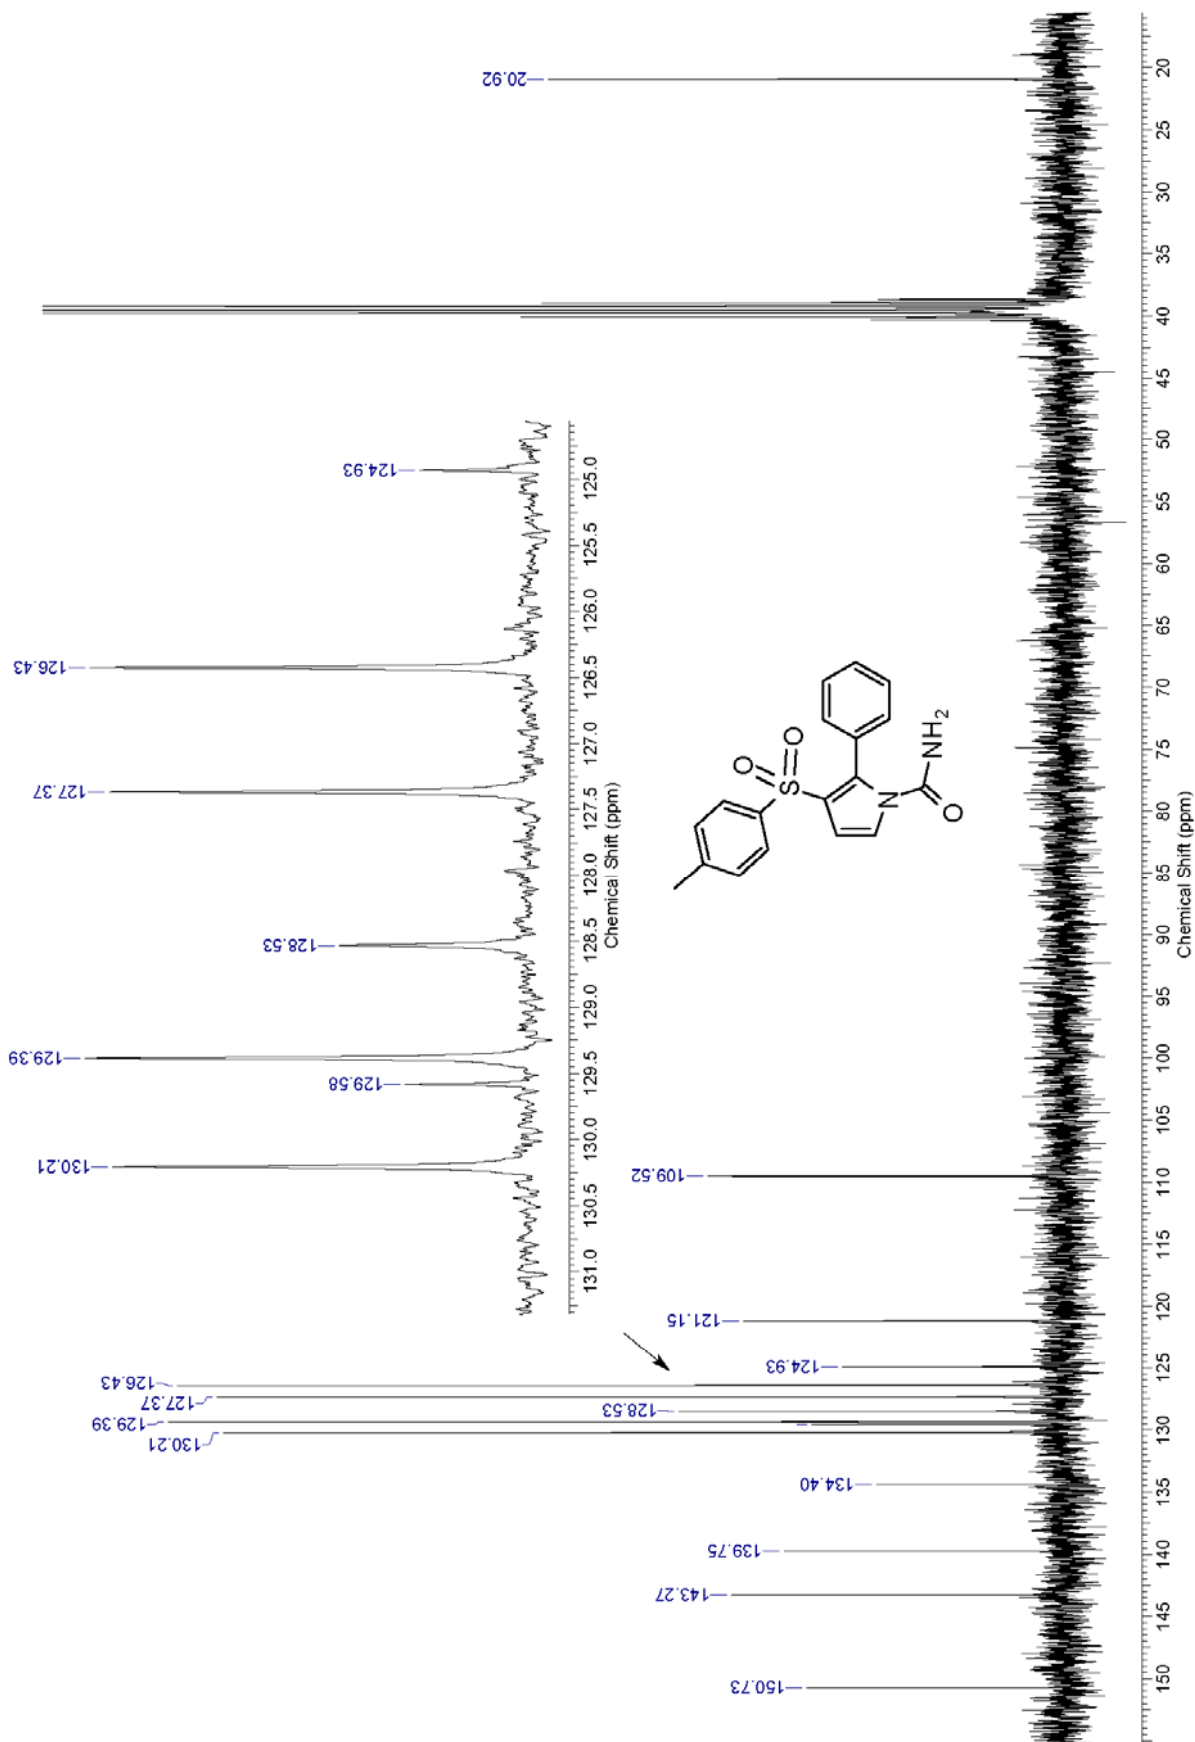

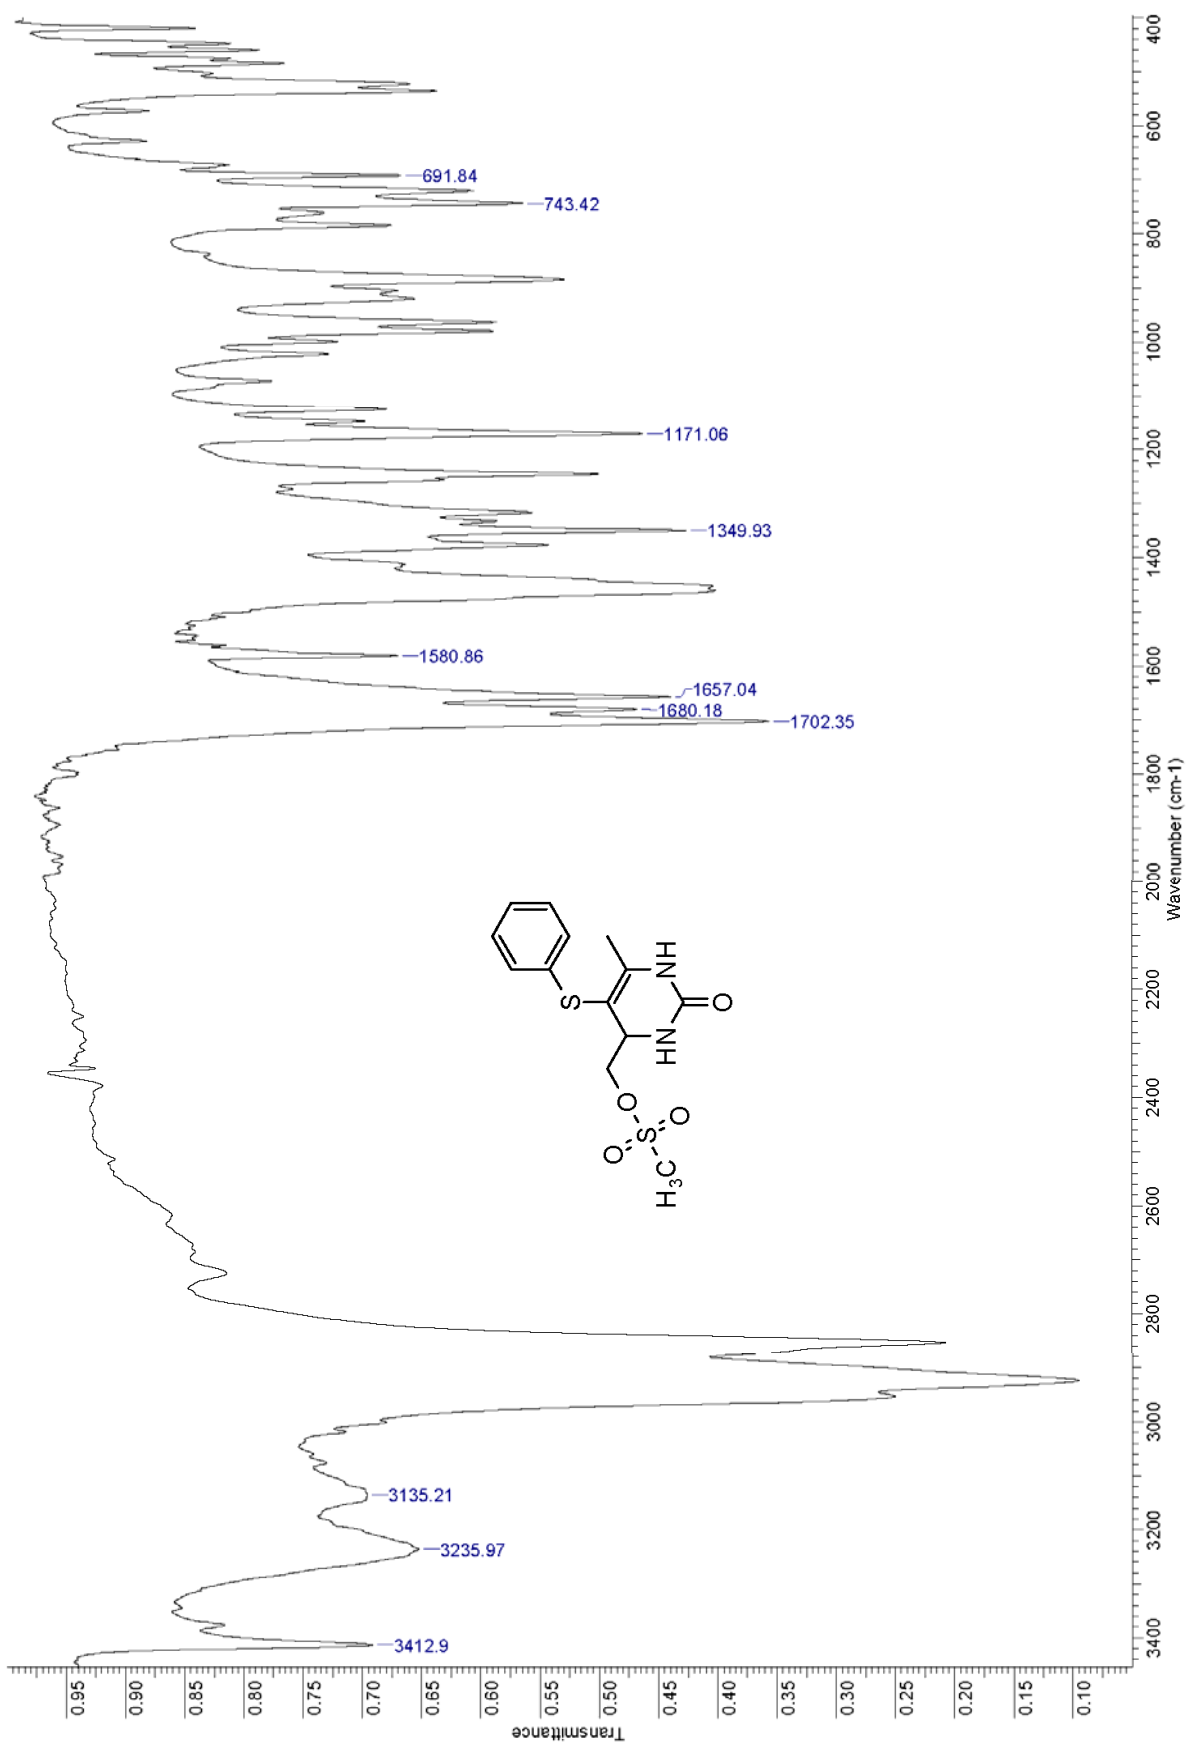

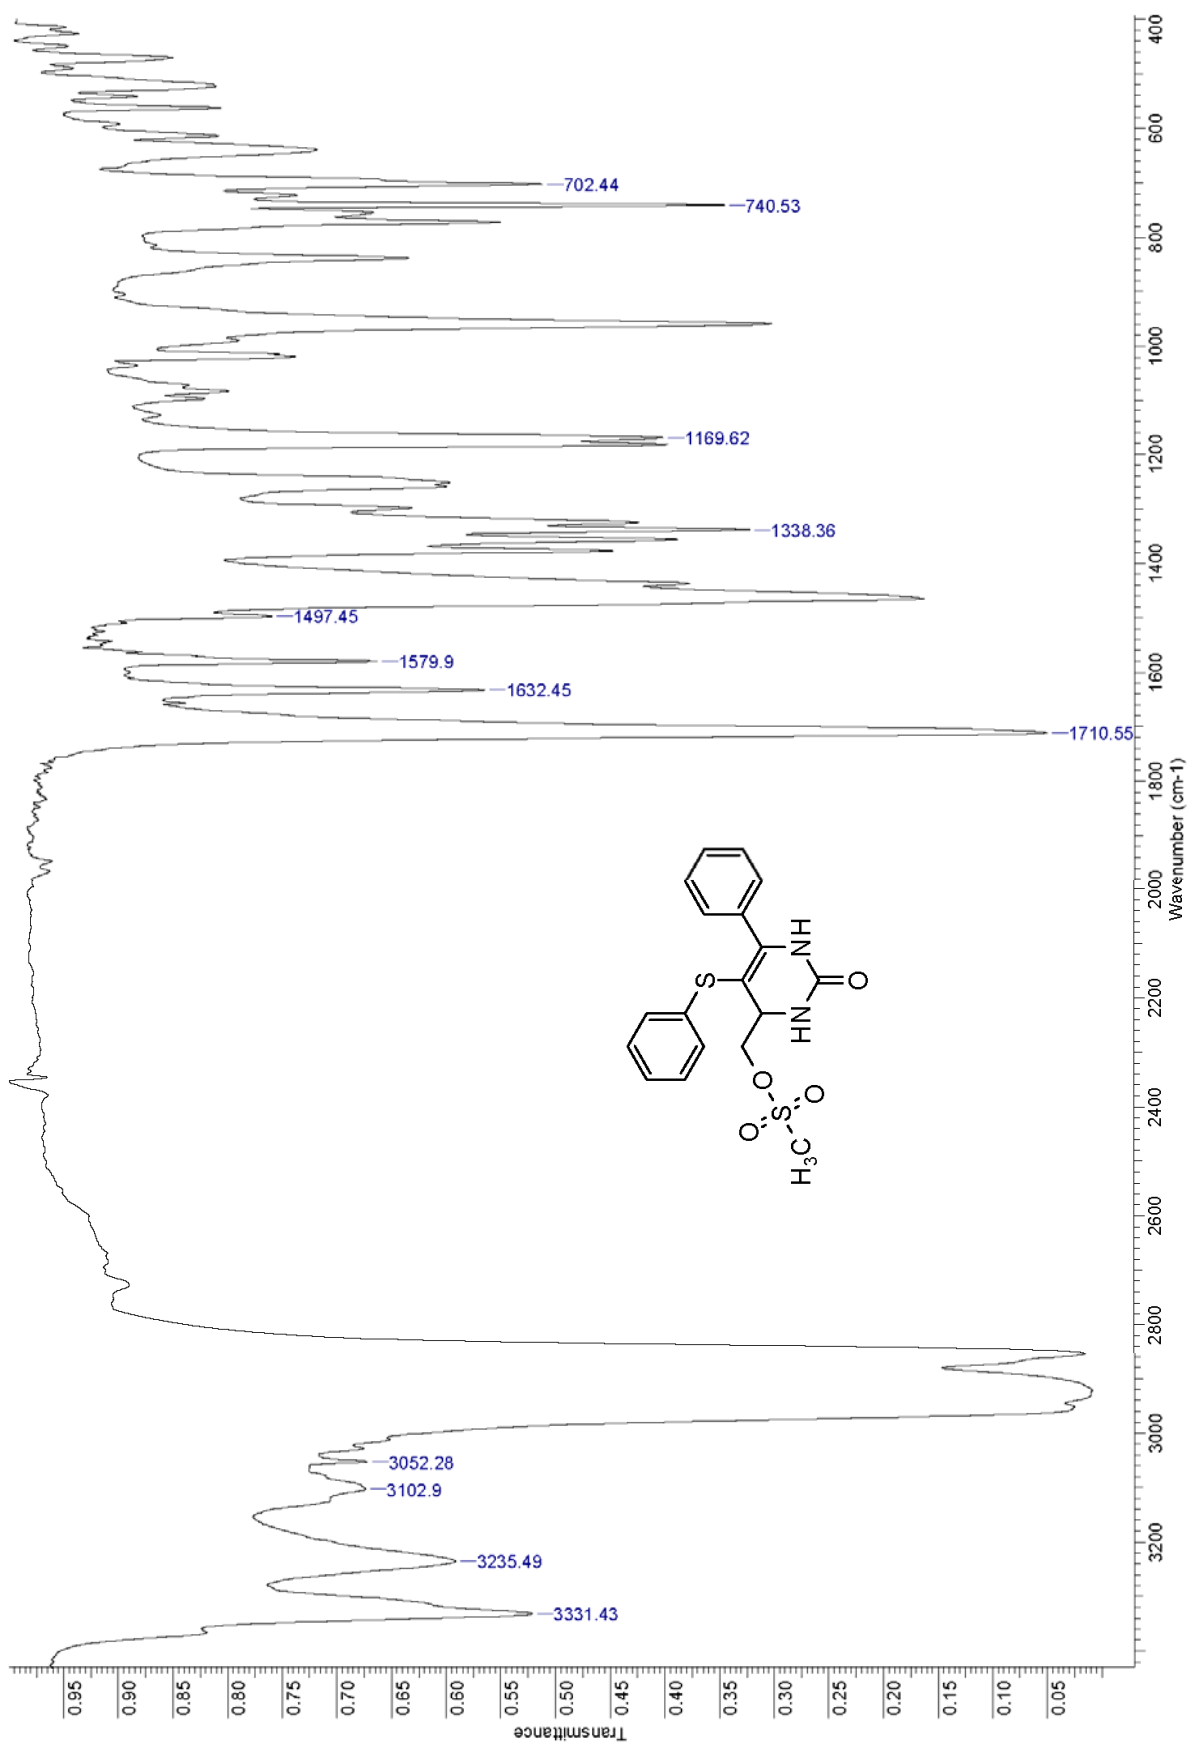

IR spectrum of **6b** (Nujol), Bruker Vector 22

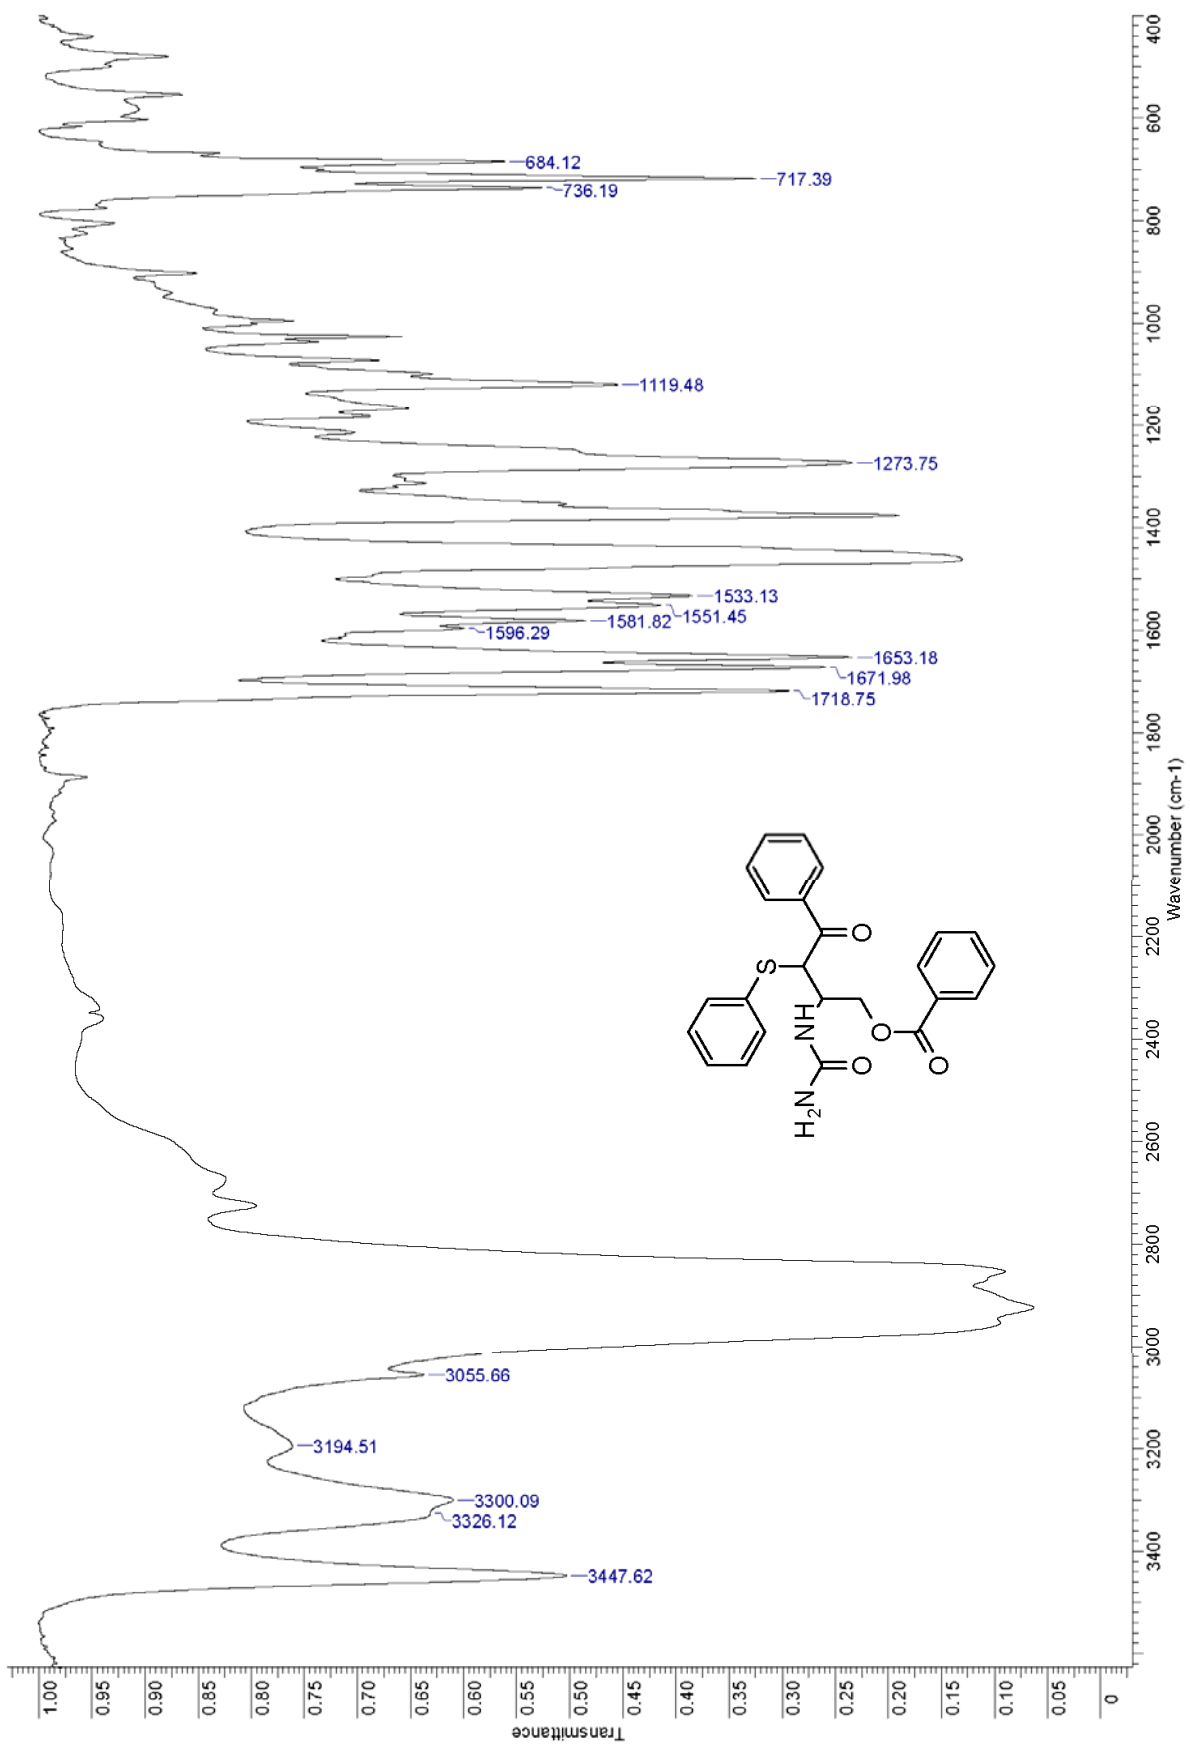

IR spectrum of **11b** (Nujol), Bruker Vector 22

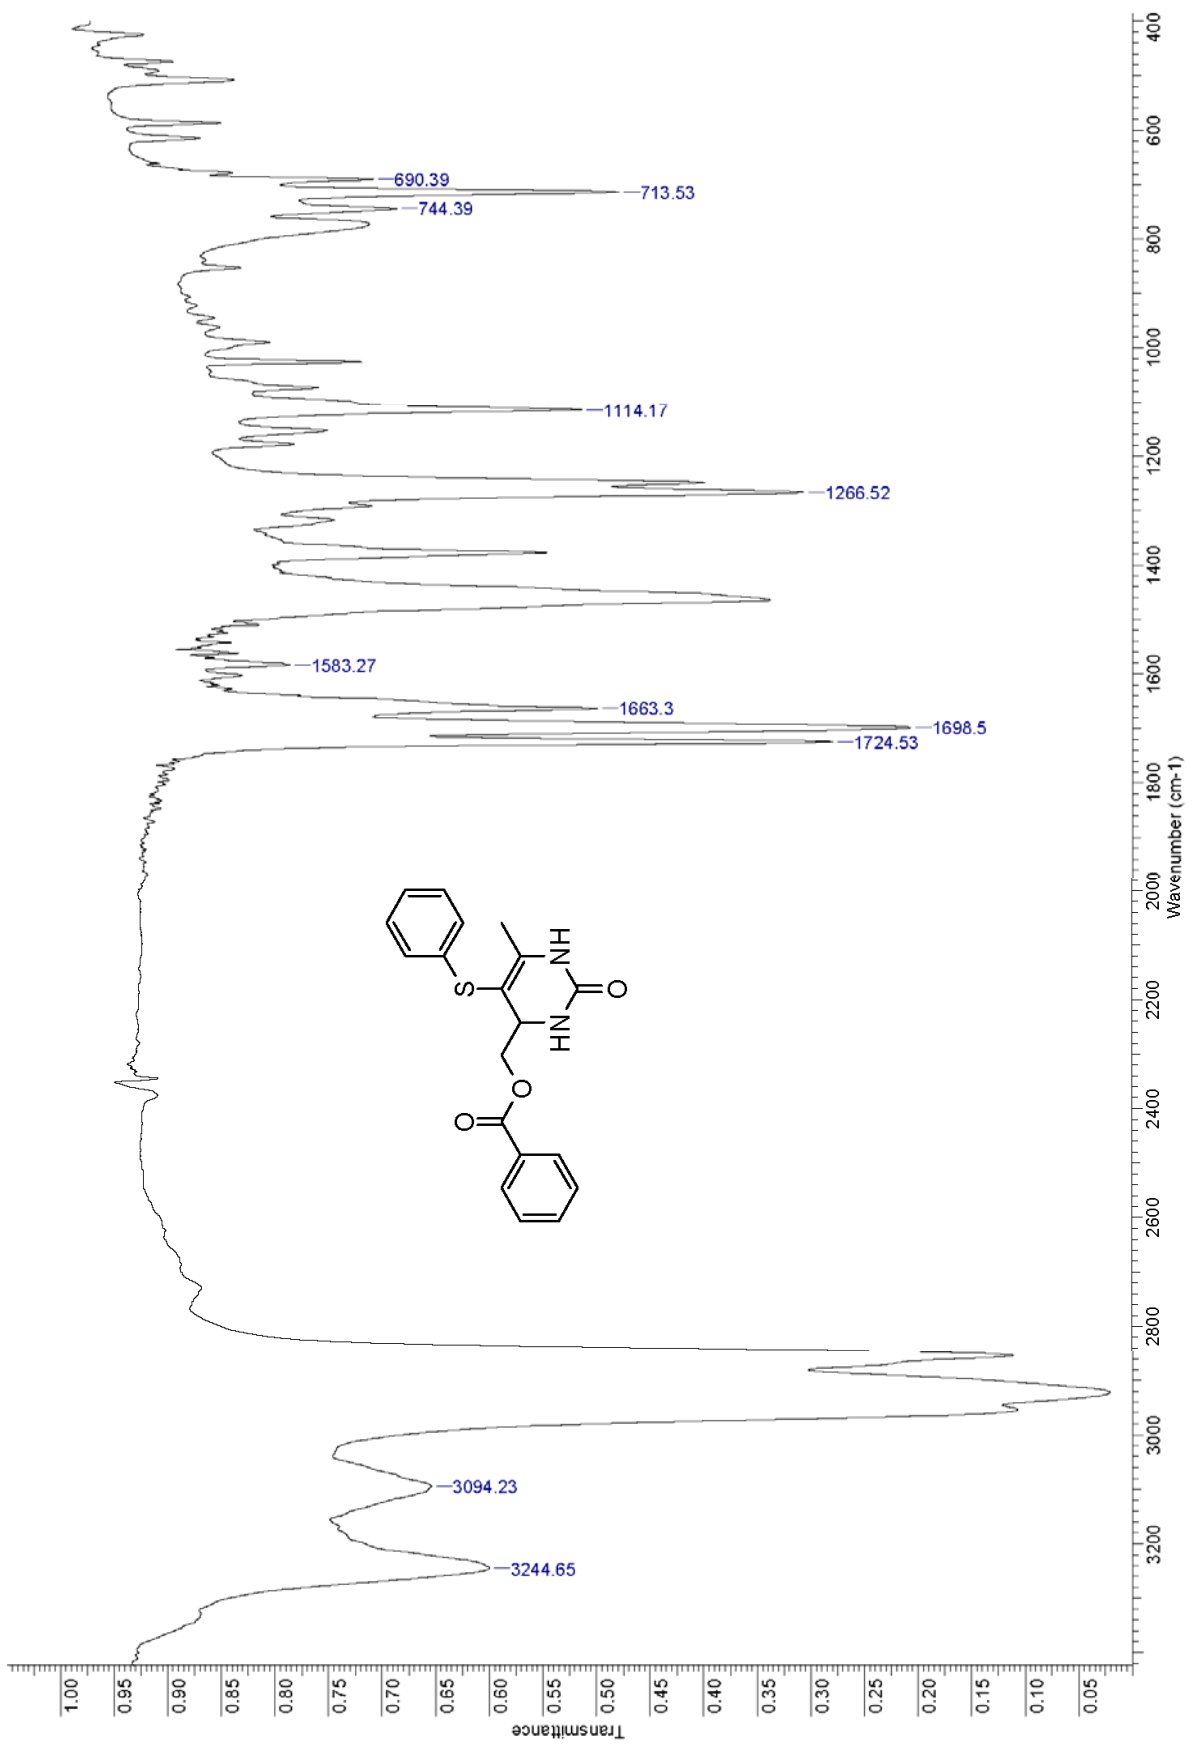

IR spectrum of **13a** (Nujol), Bruker Vector 22

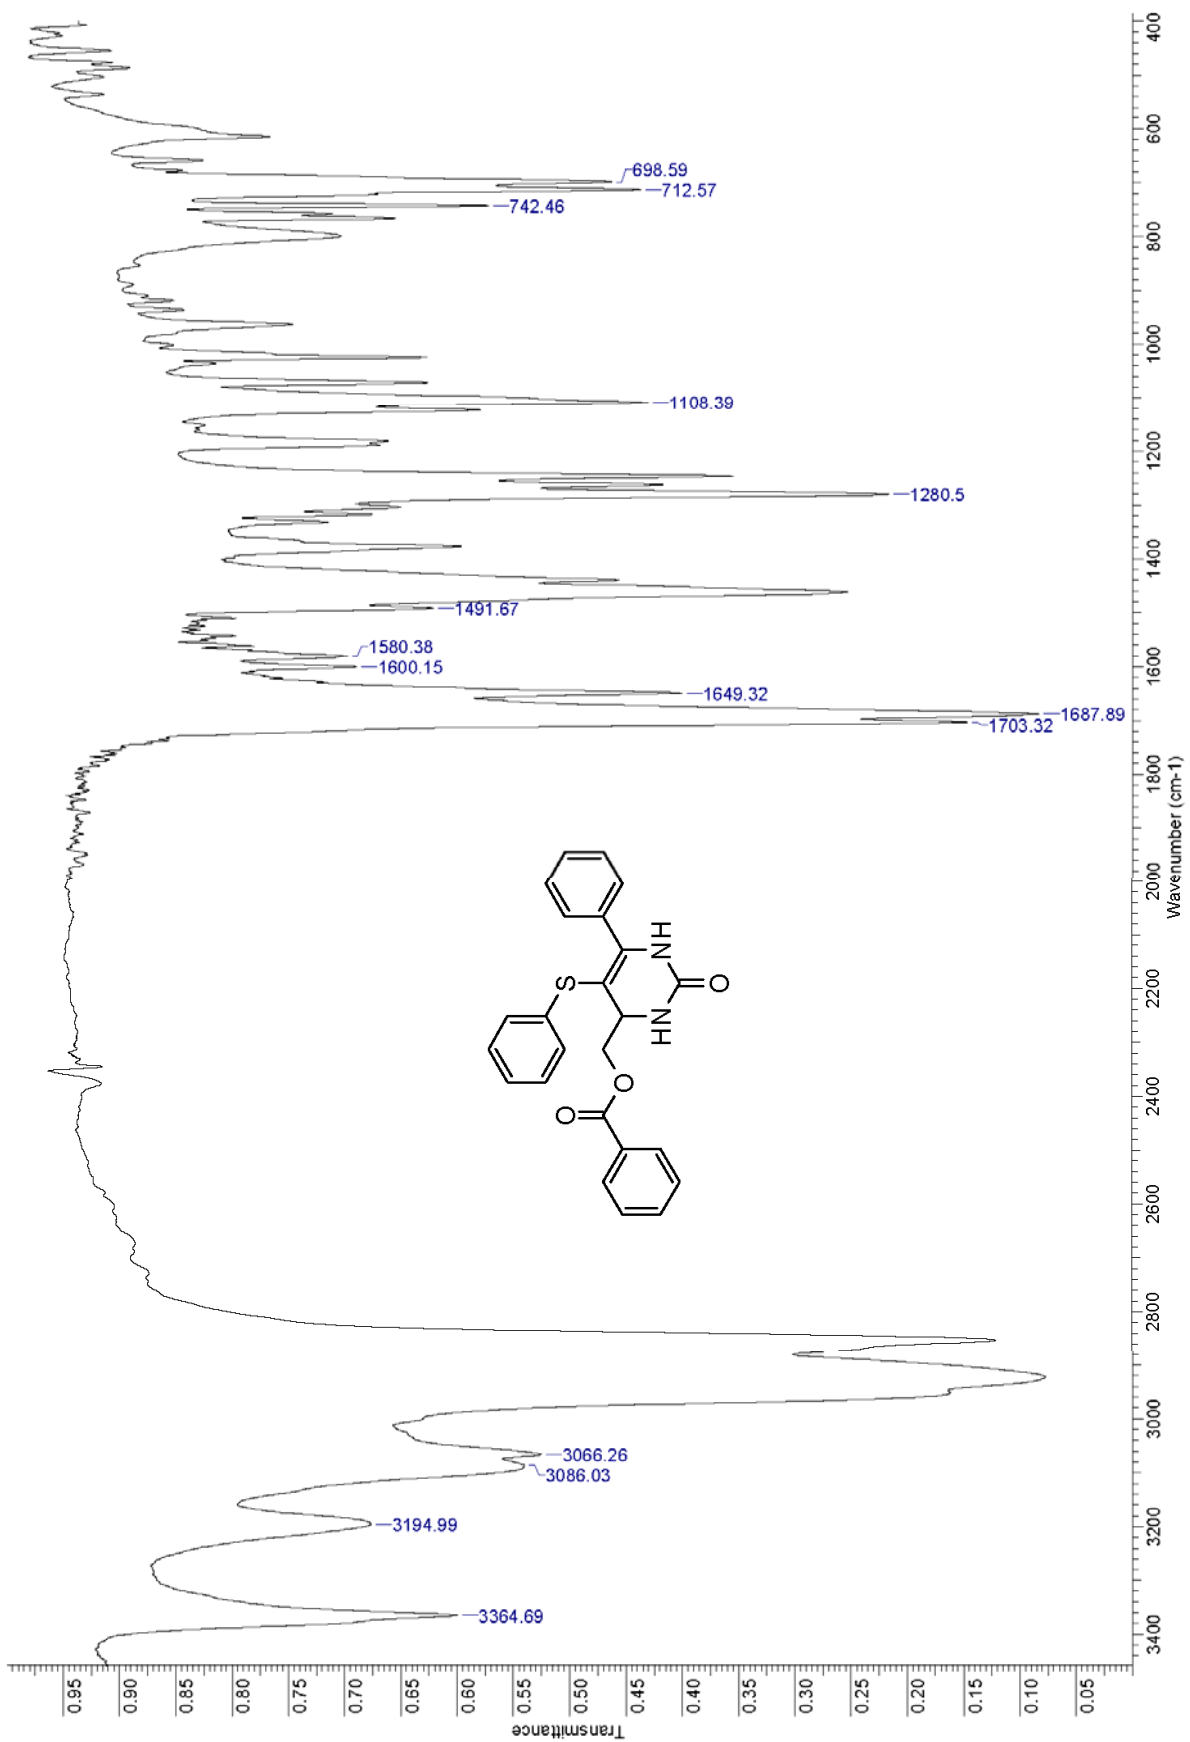

IR spectrum of **13b** (Nujol), Bruker Vector 22



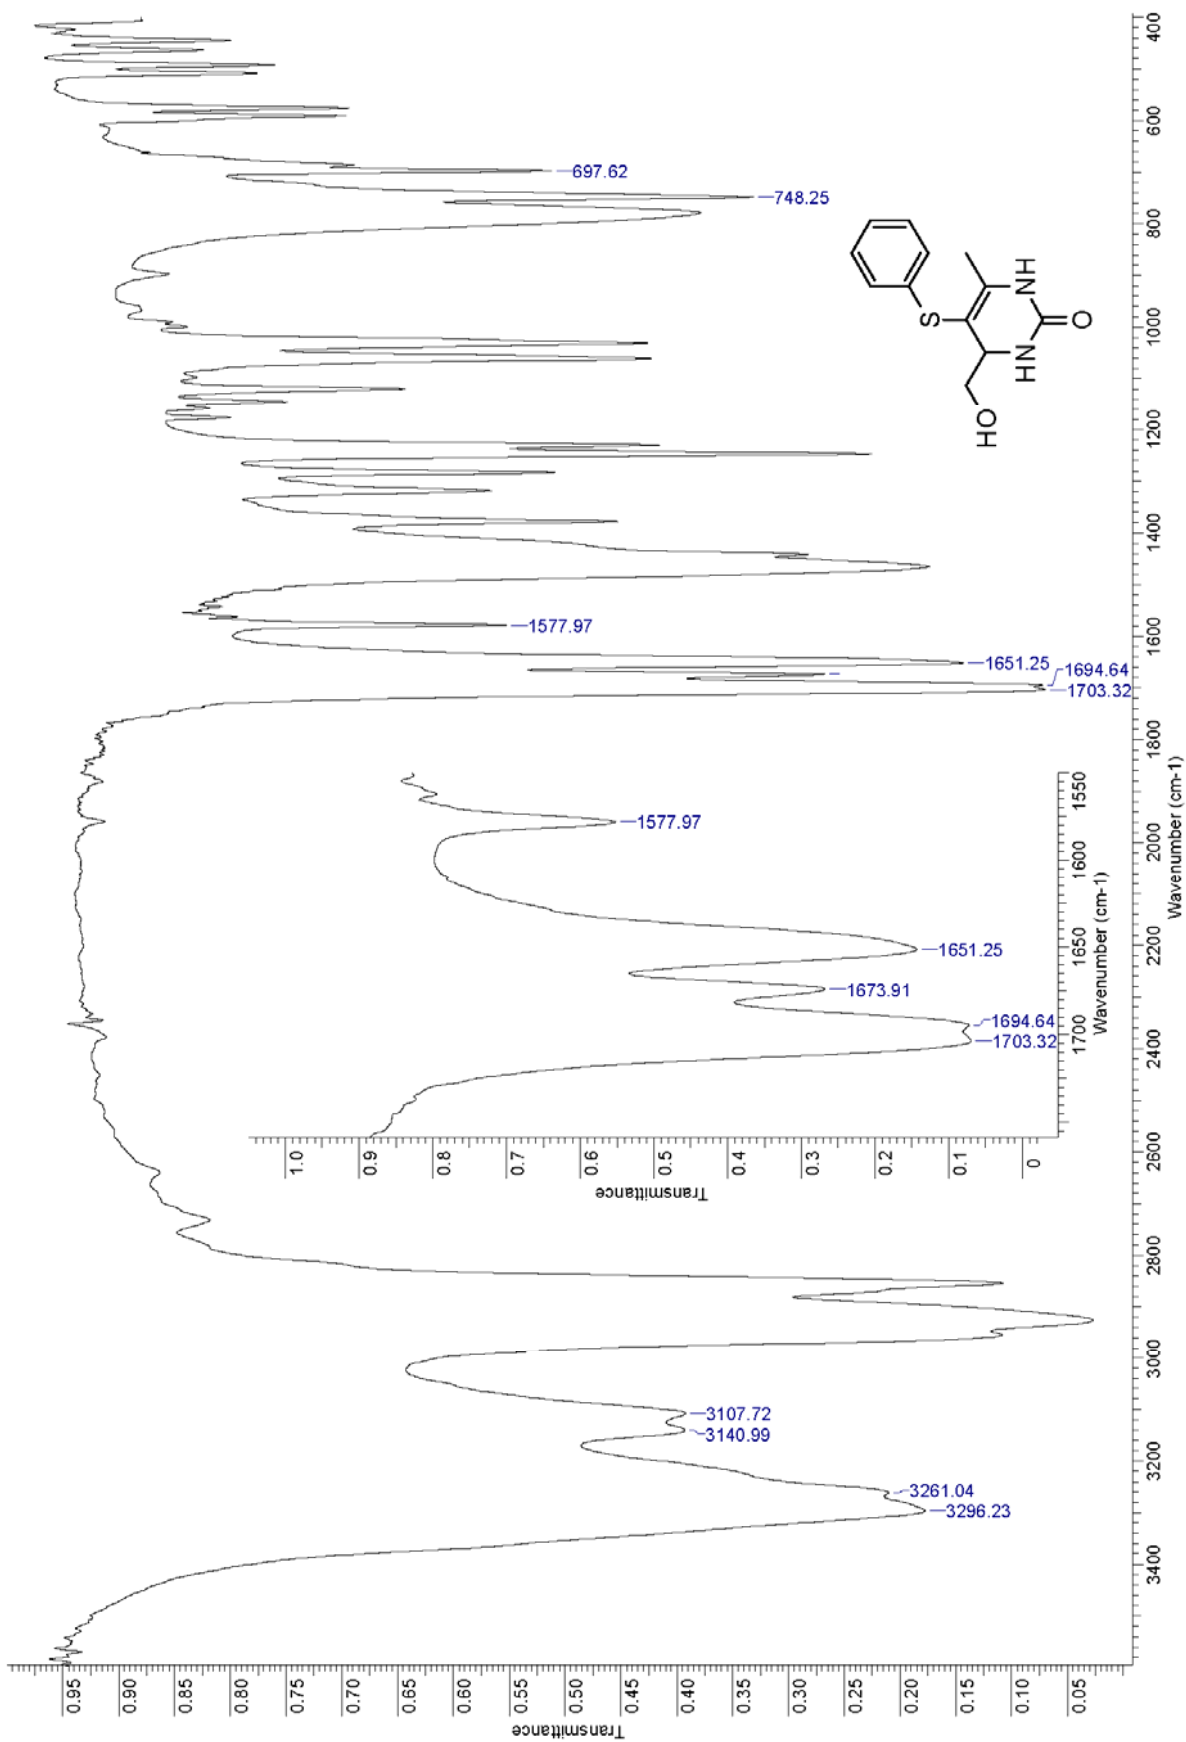

IR spectrum of 14a (Nujol), Bruker Vector 22

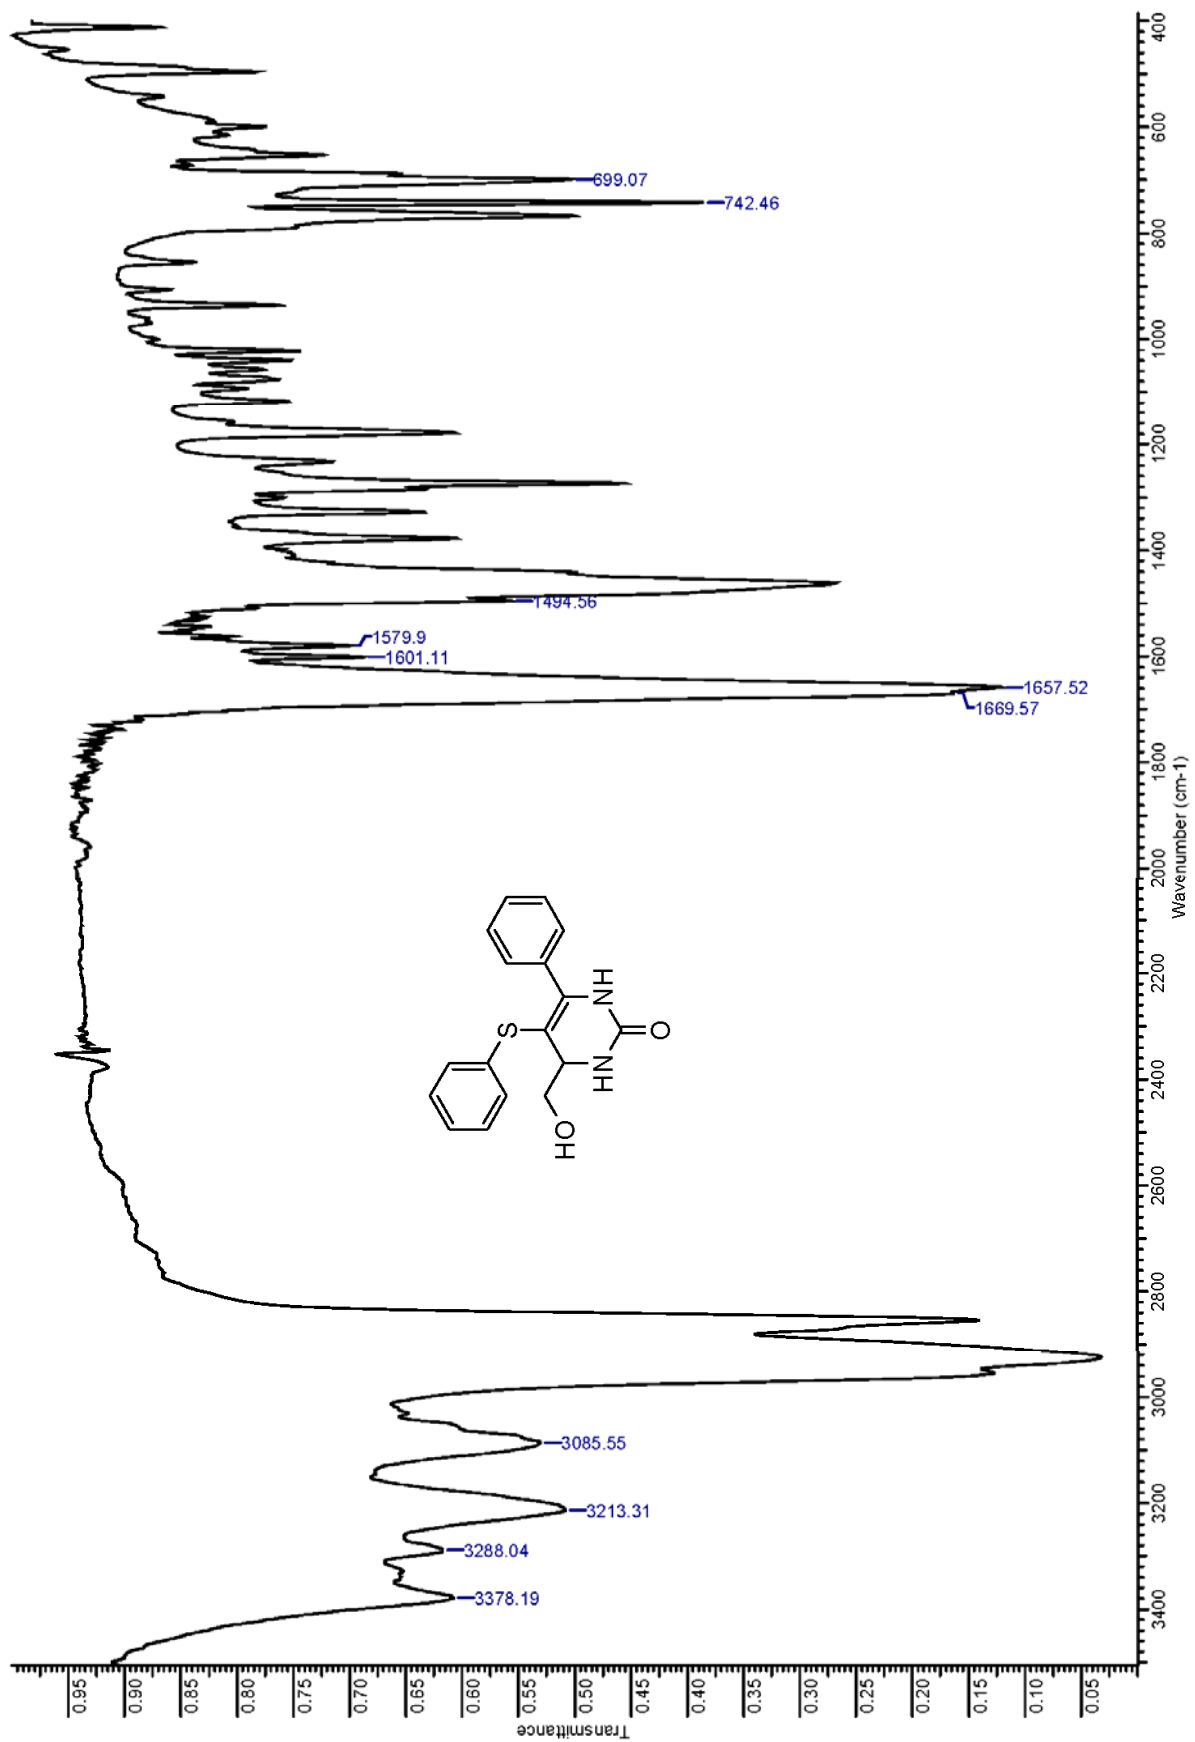

IR spectrum of **14b** (Nujol), Bruker Vector 22

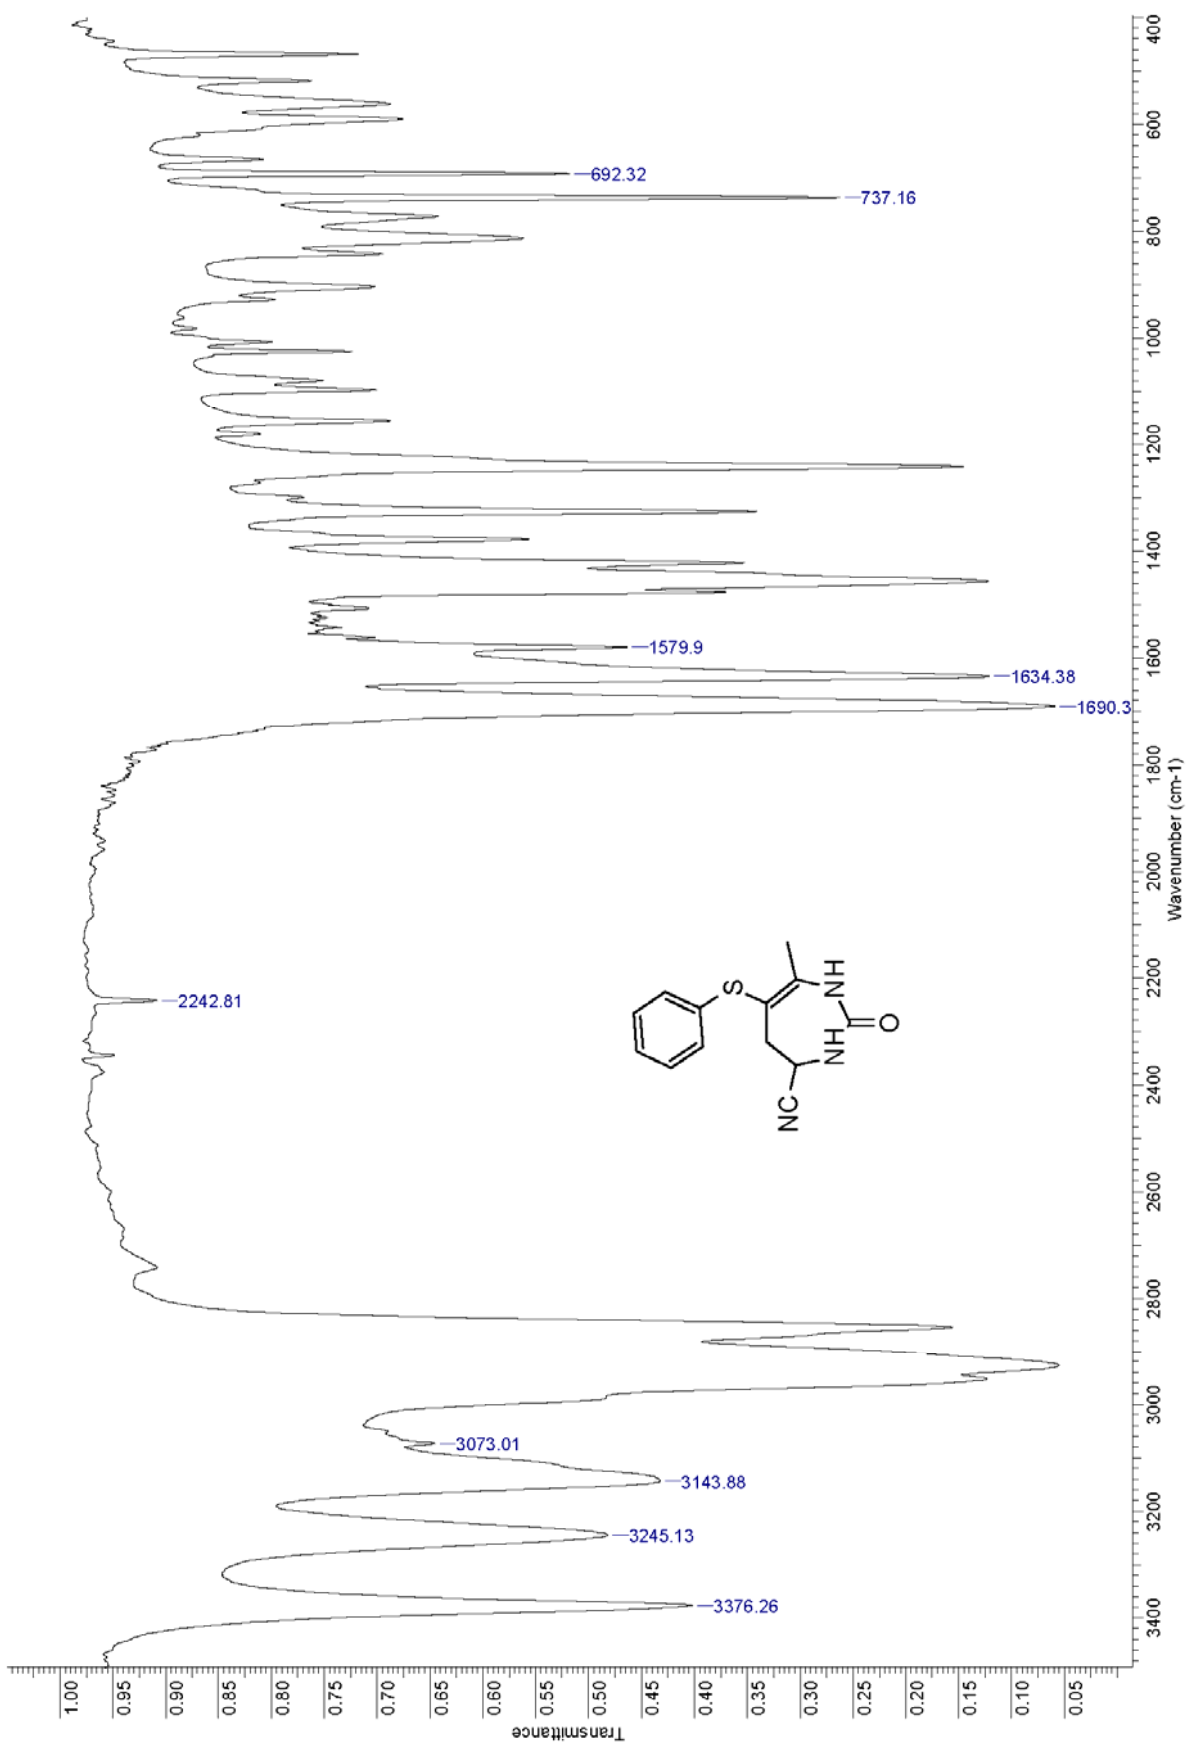

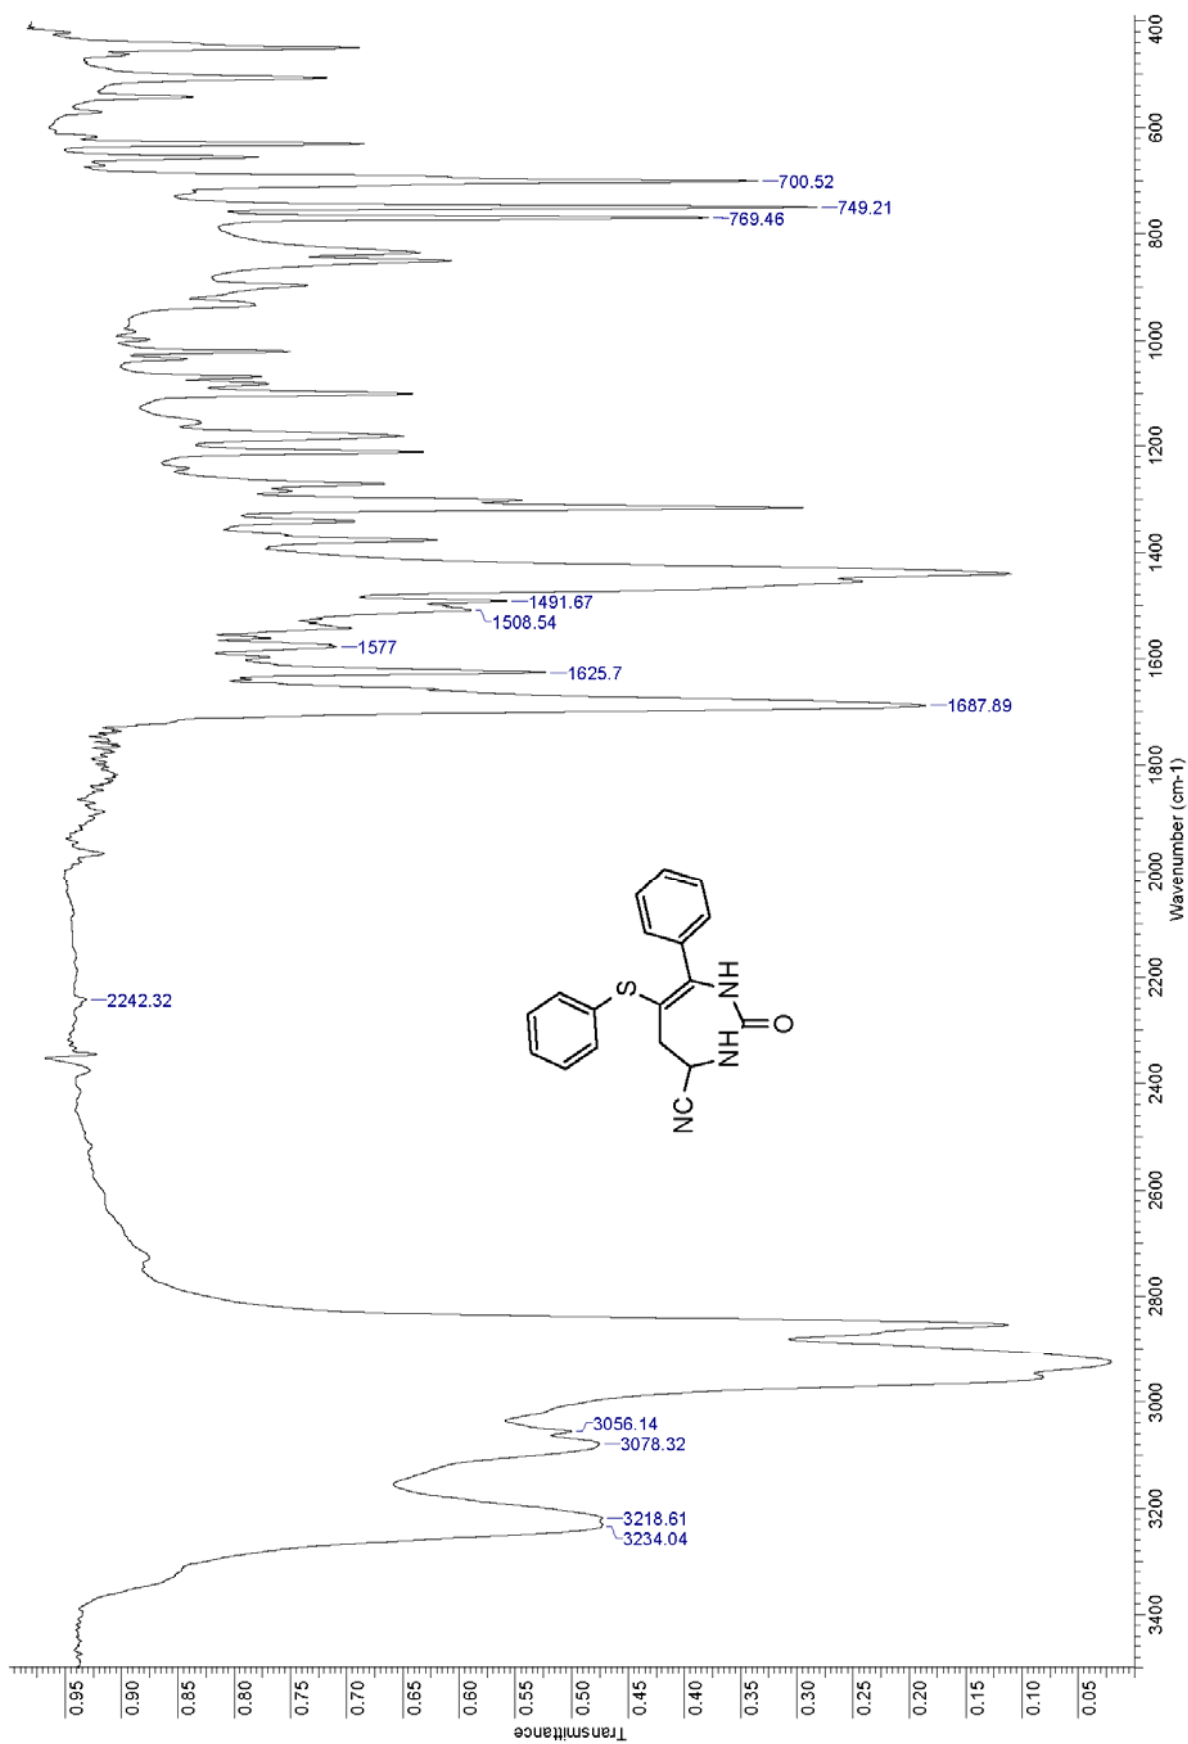

IR spectrum of **15b** (Nujol), Bruker Vector 22

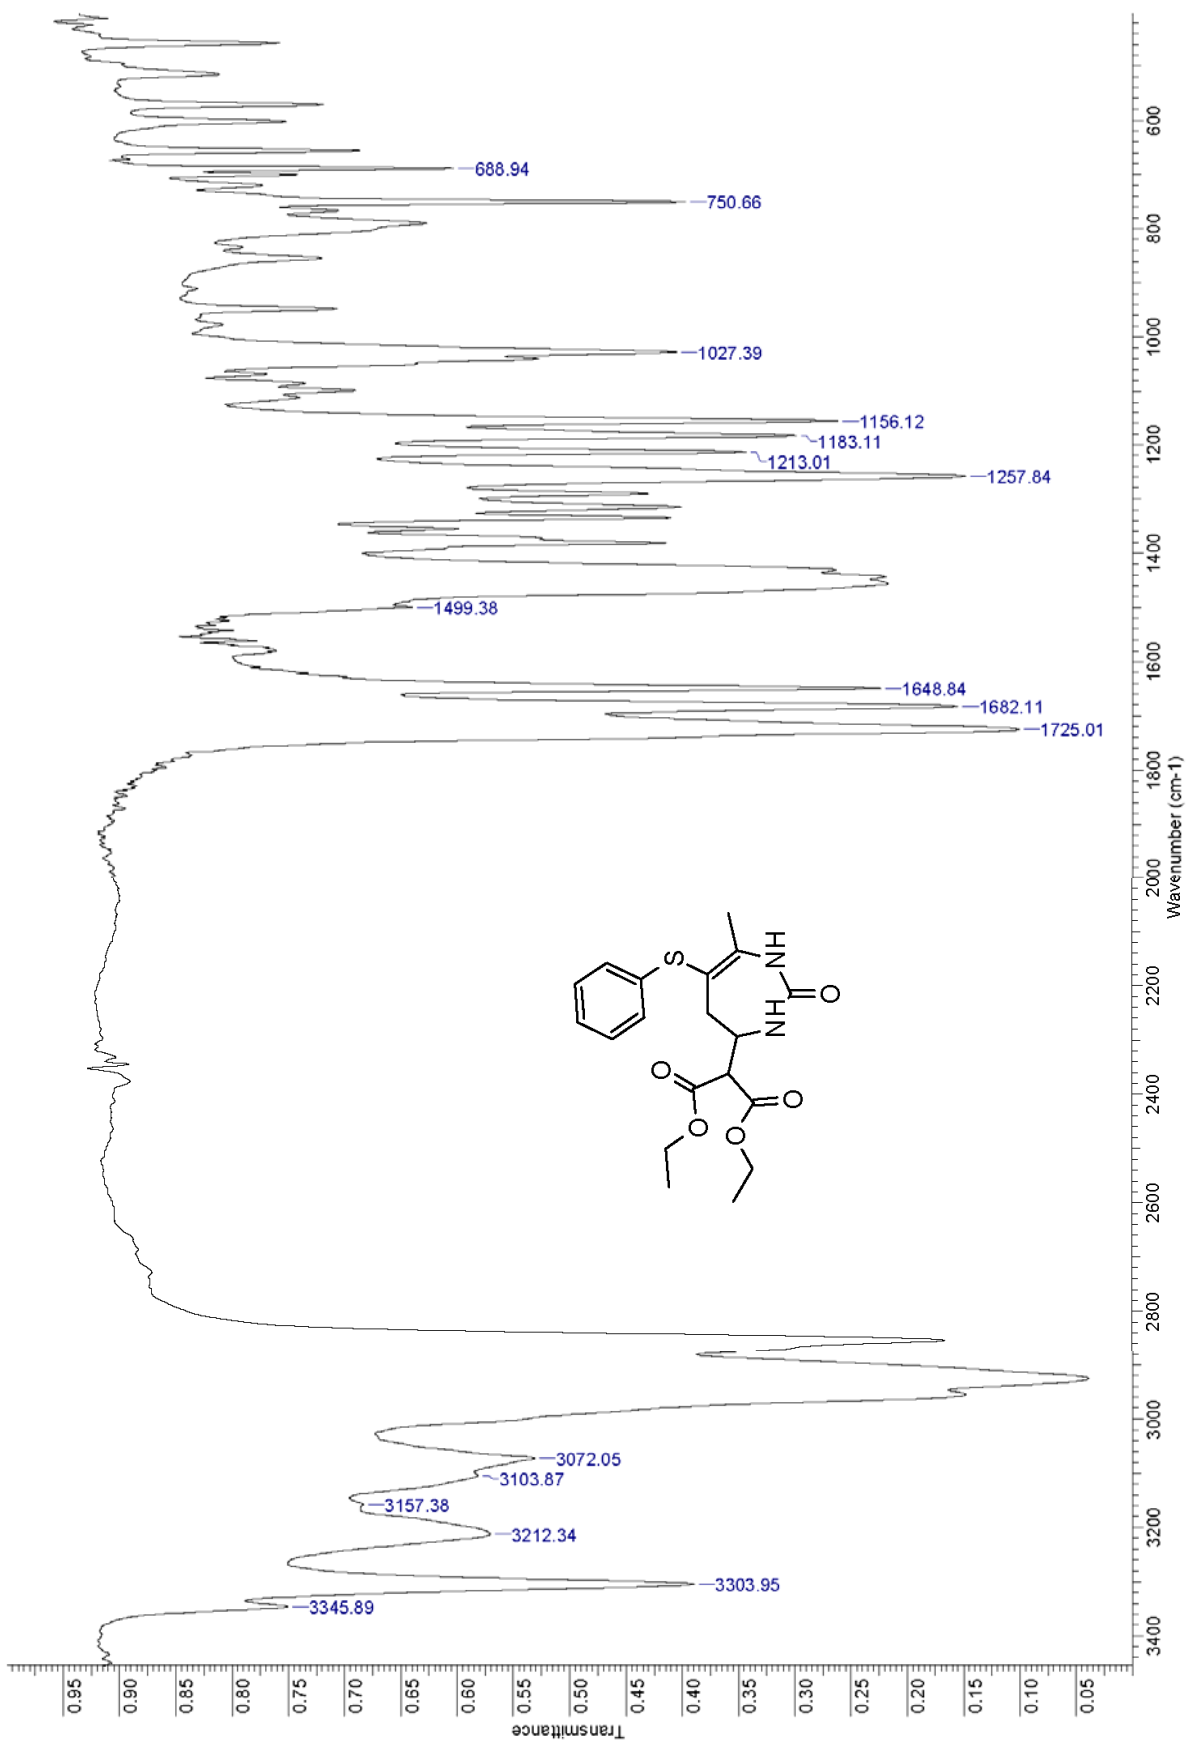

IR spectrum of **16a** (Nujol), Bruker Vector 22

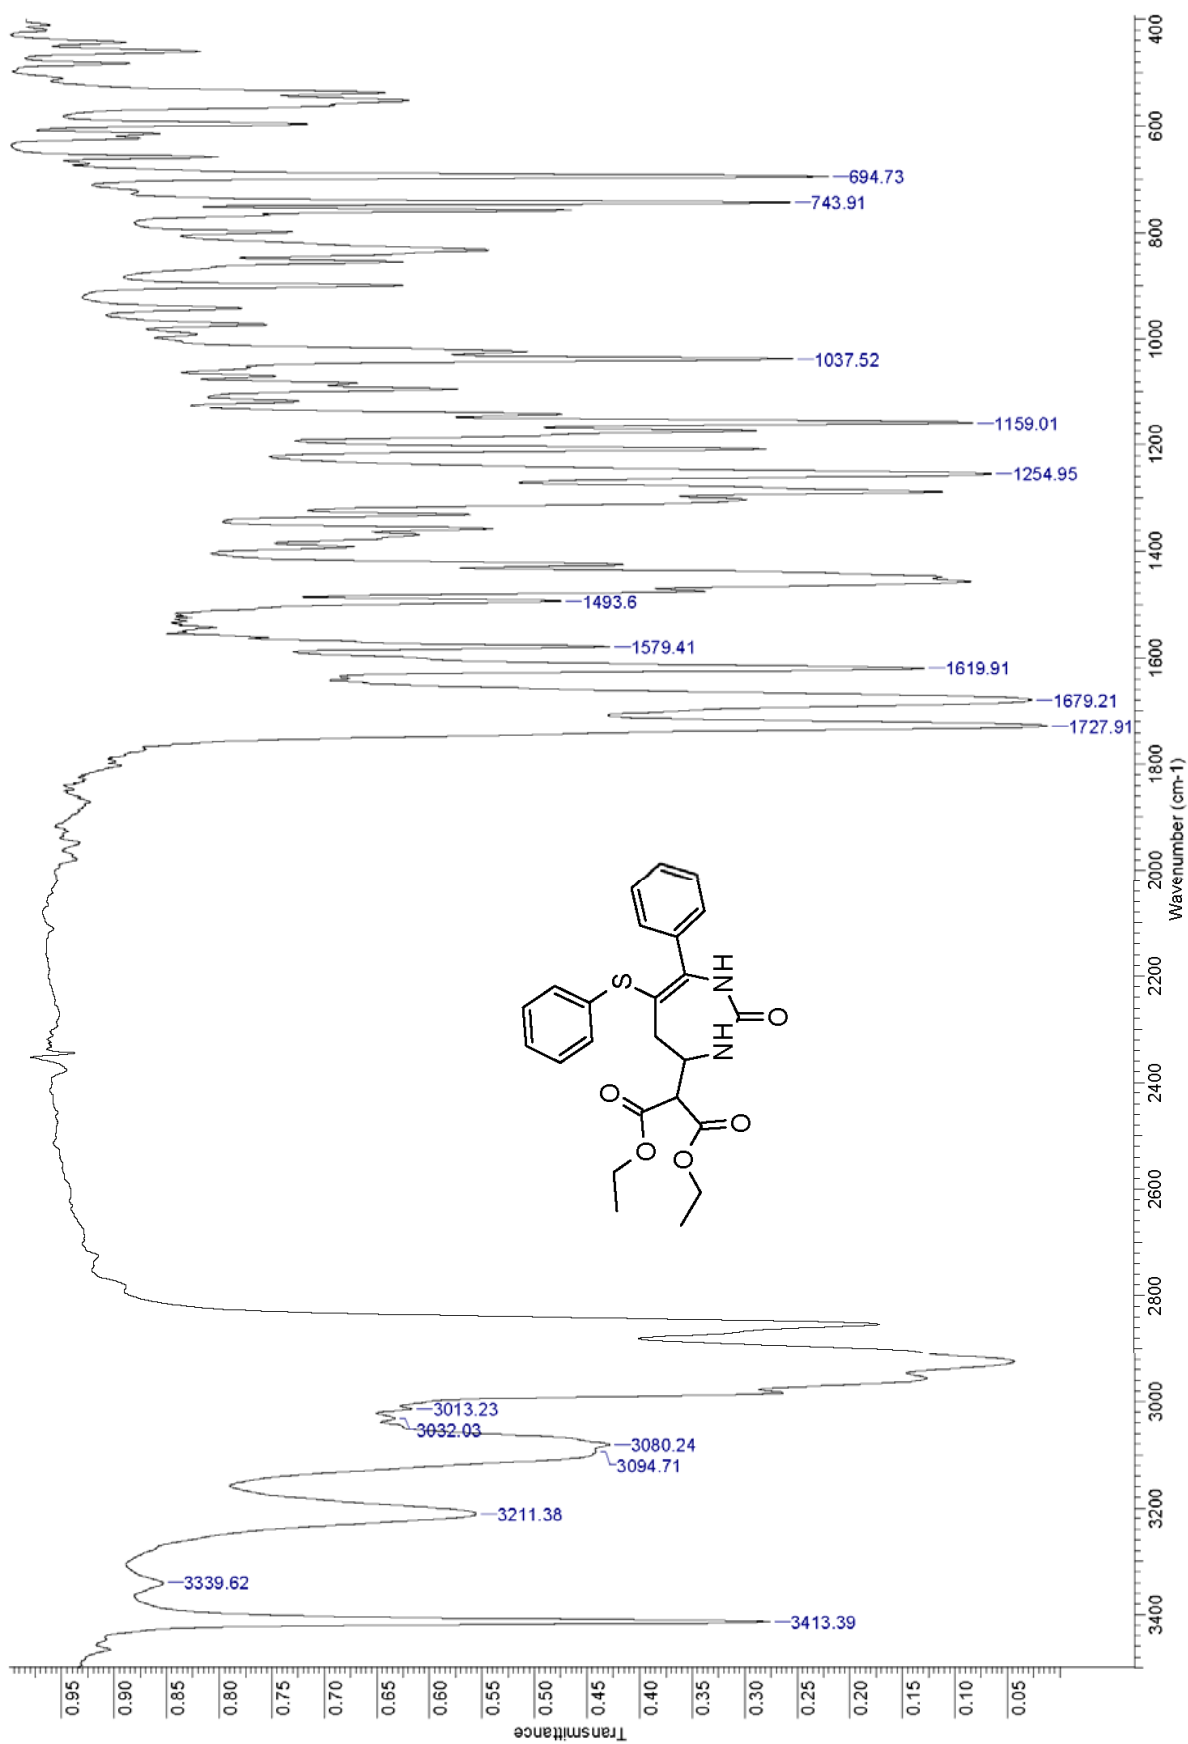

IR spectrum of **16b** (Nujol), Bruker Vector 22

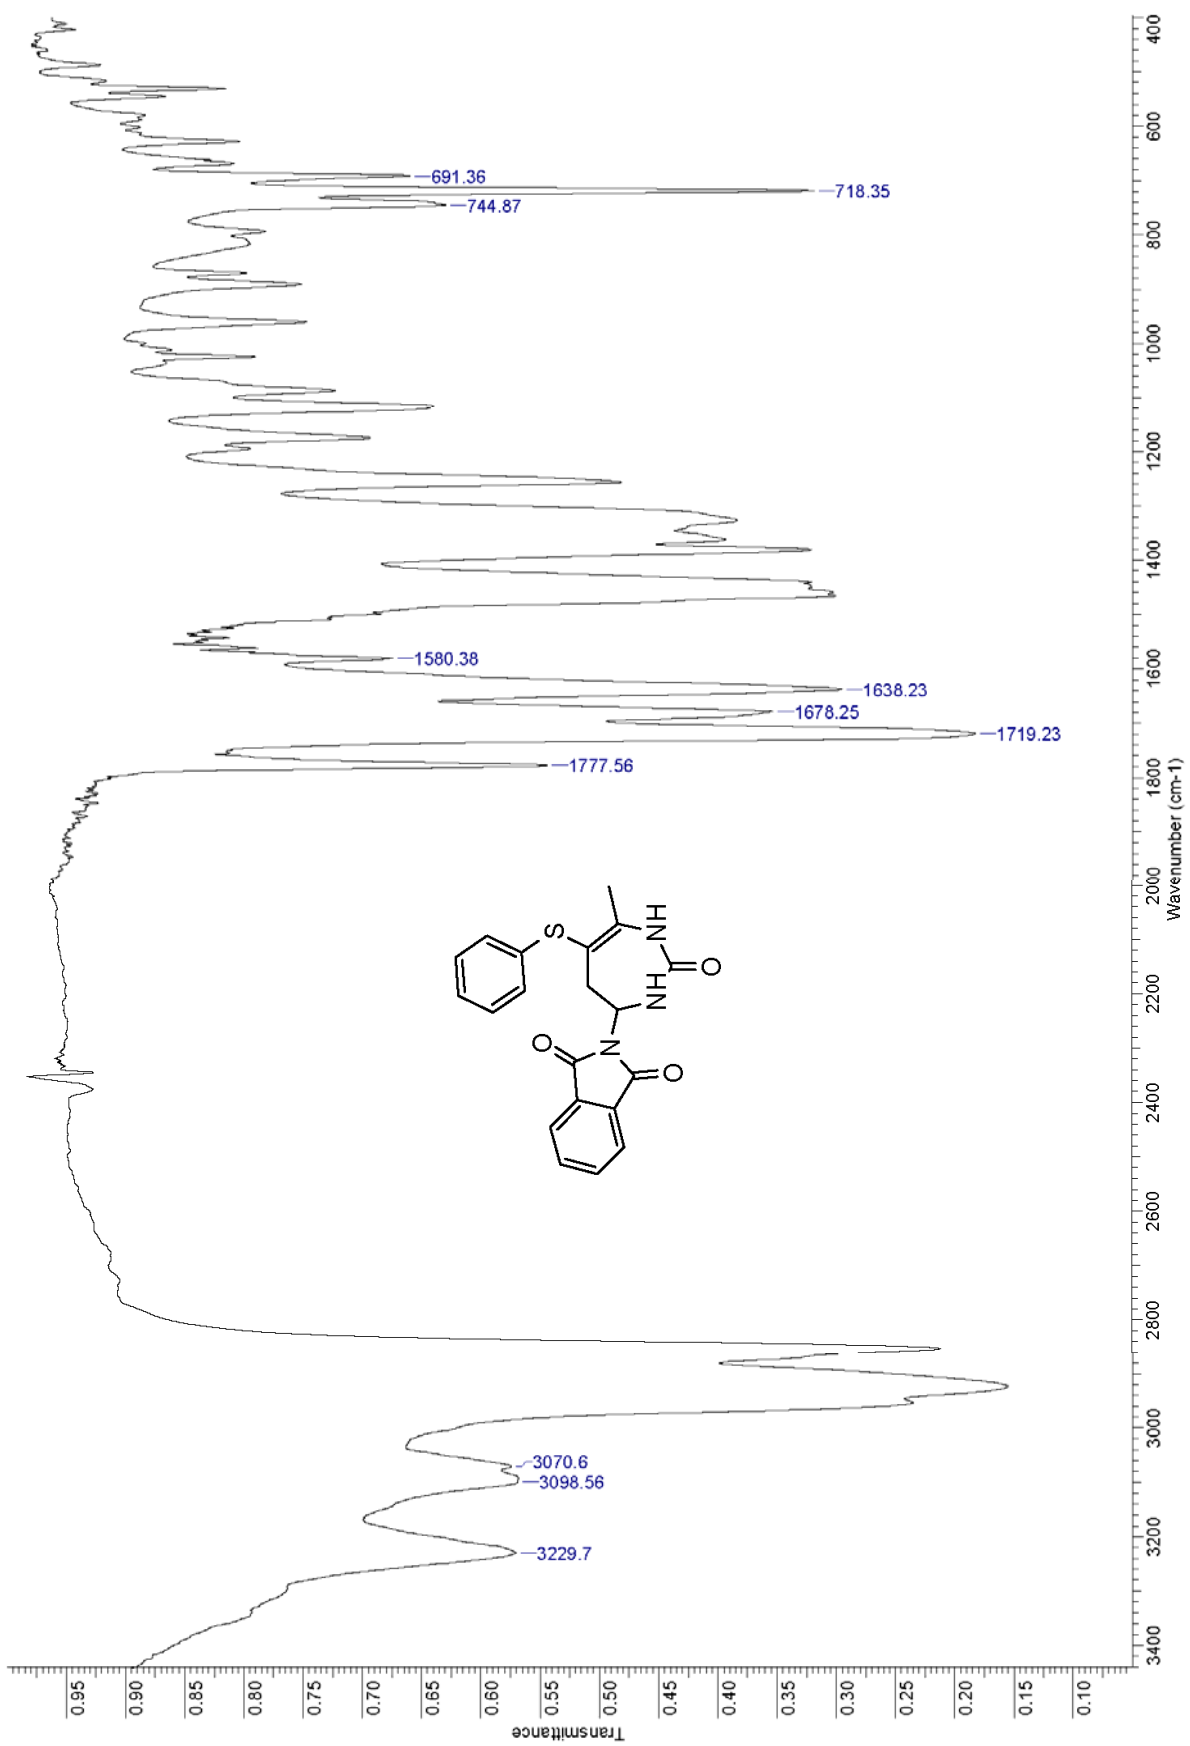

IR spectrum of **17a** (Nujol), Bruker Vector 22

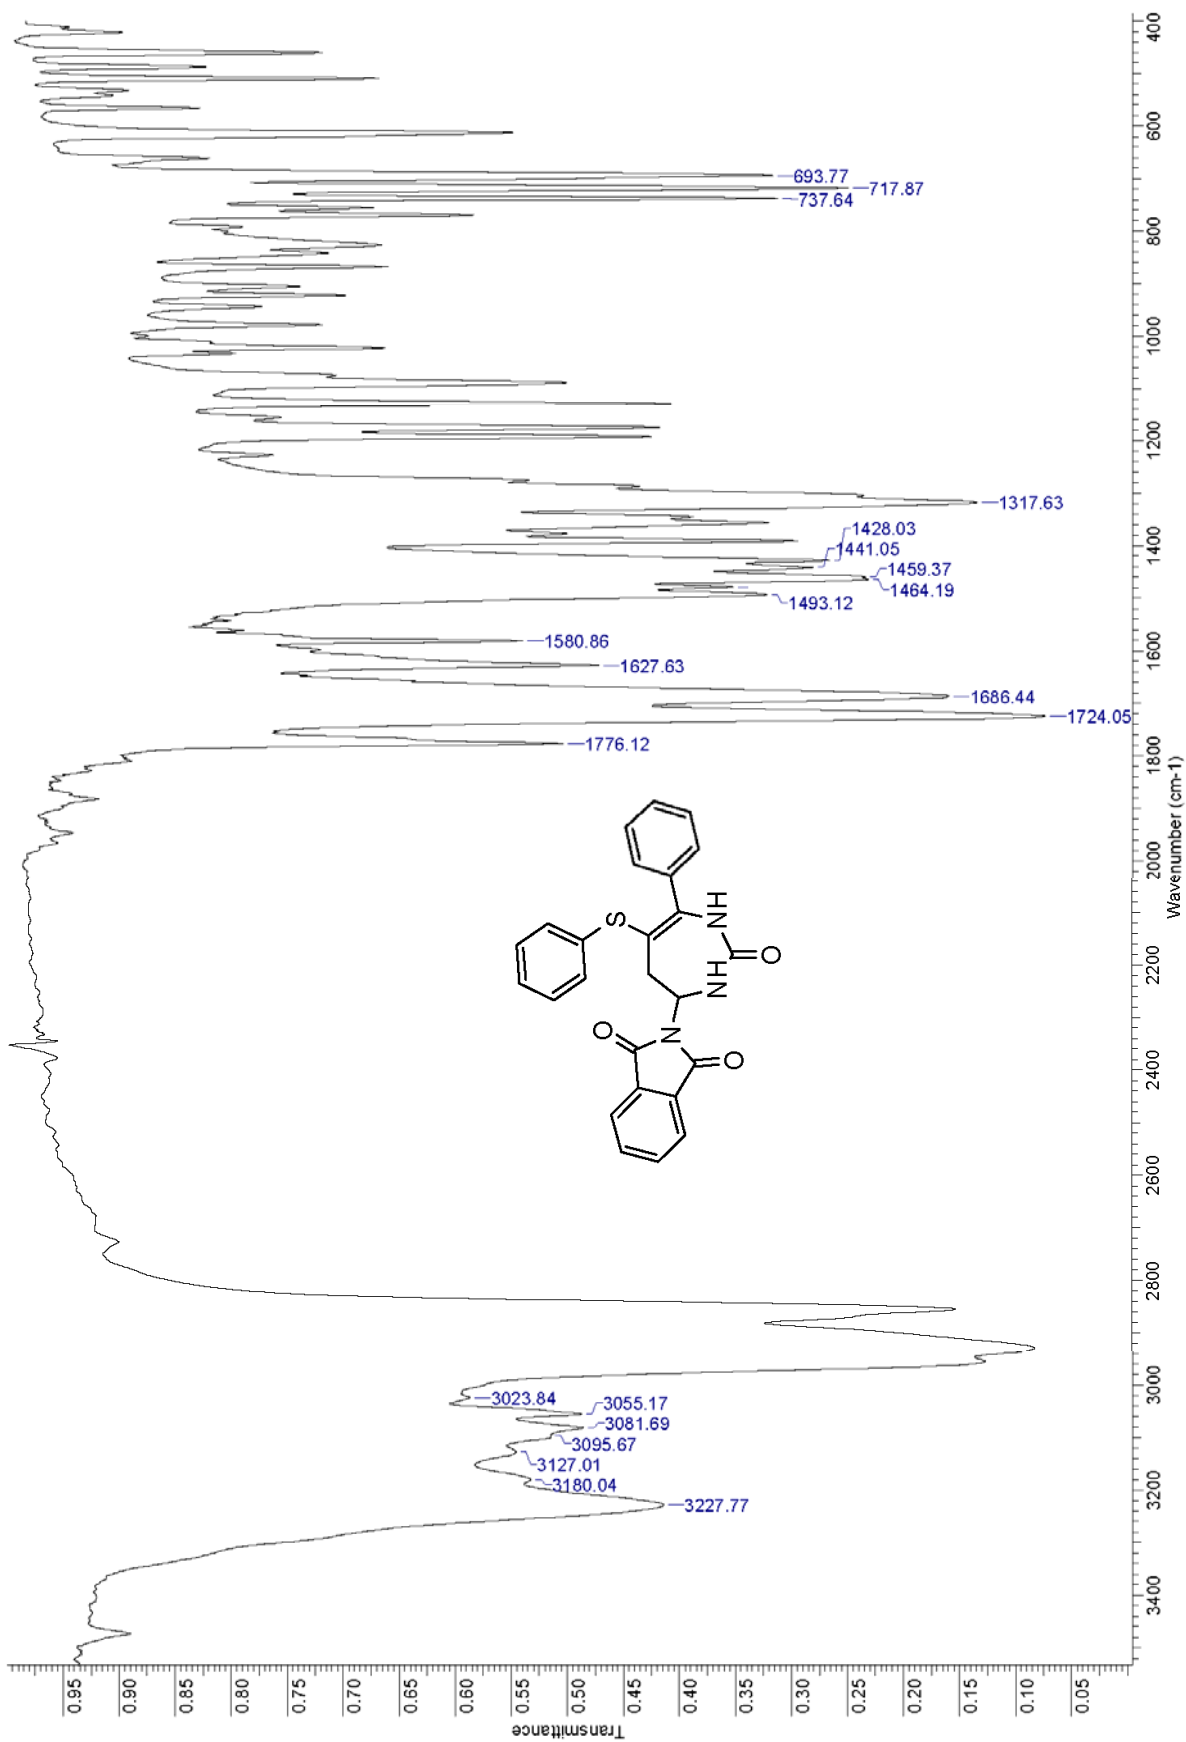

IR spectrum of 17b (Nujol), Bruker Vector 22



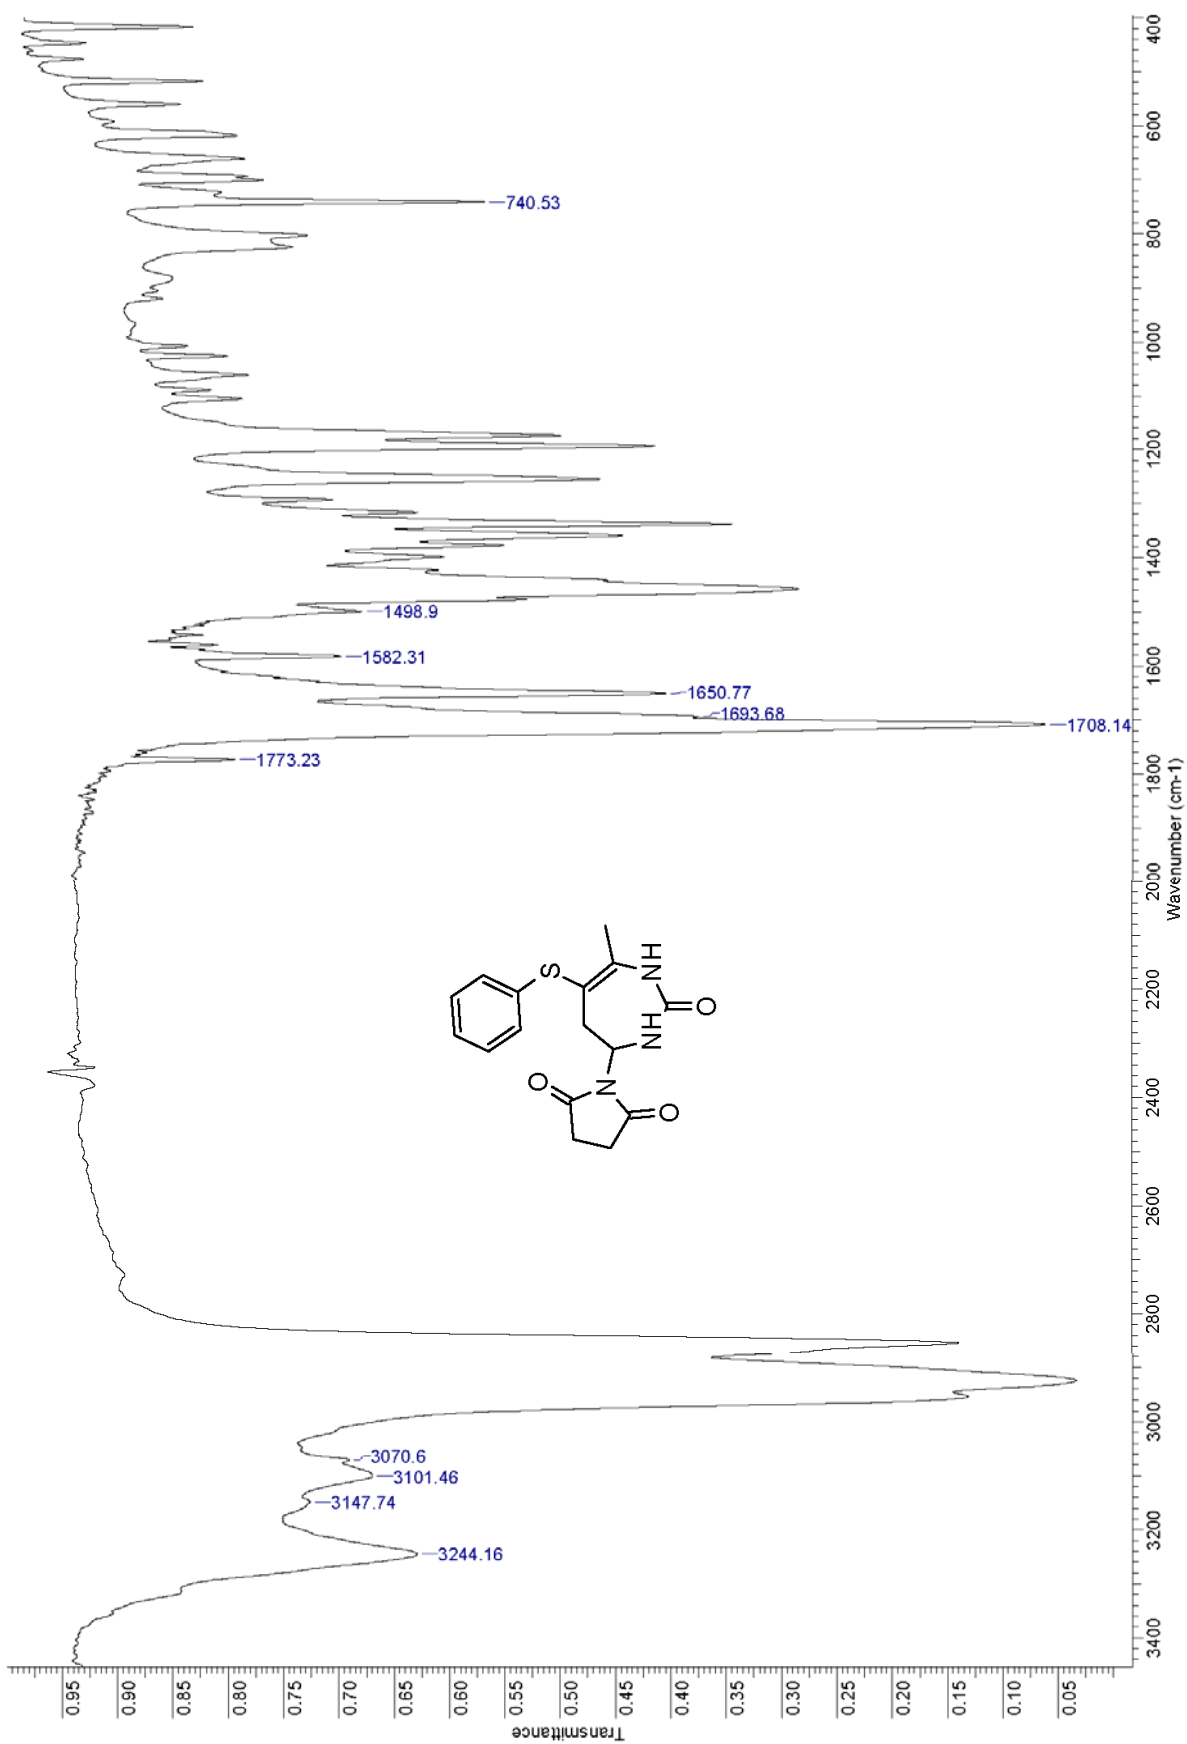

IR spectrum of **18a** (Nujol), Bruker Vector 22

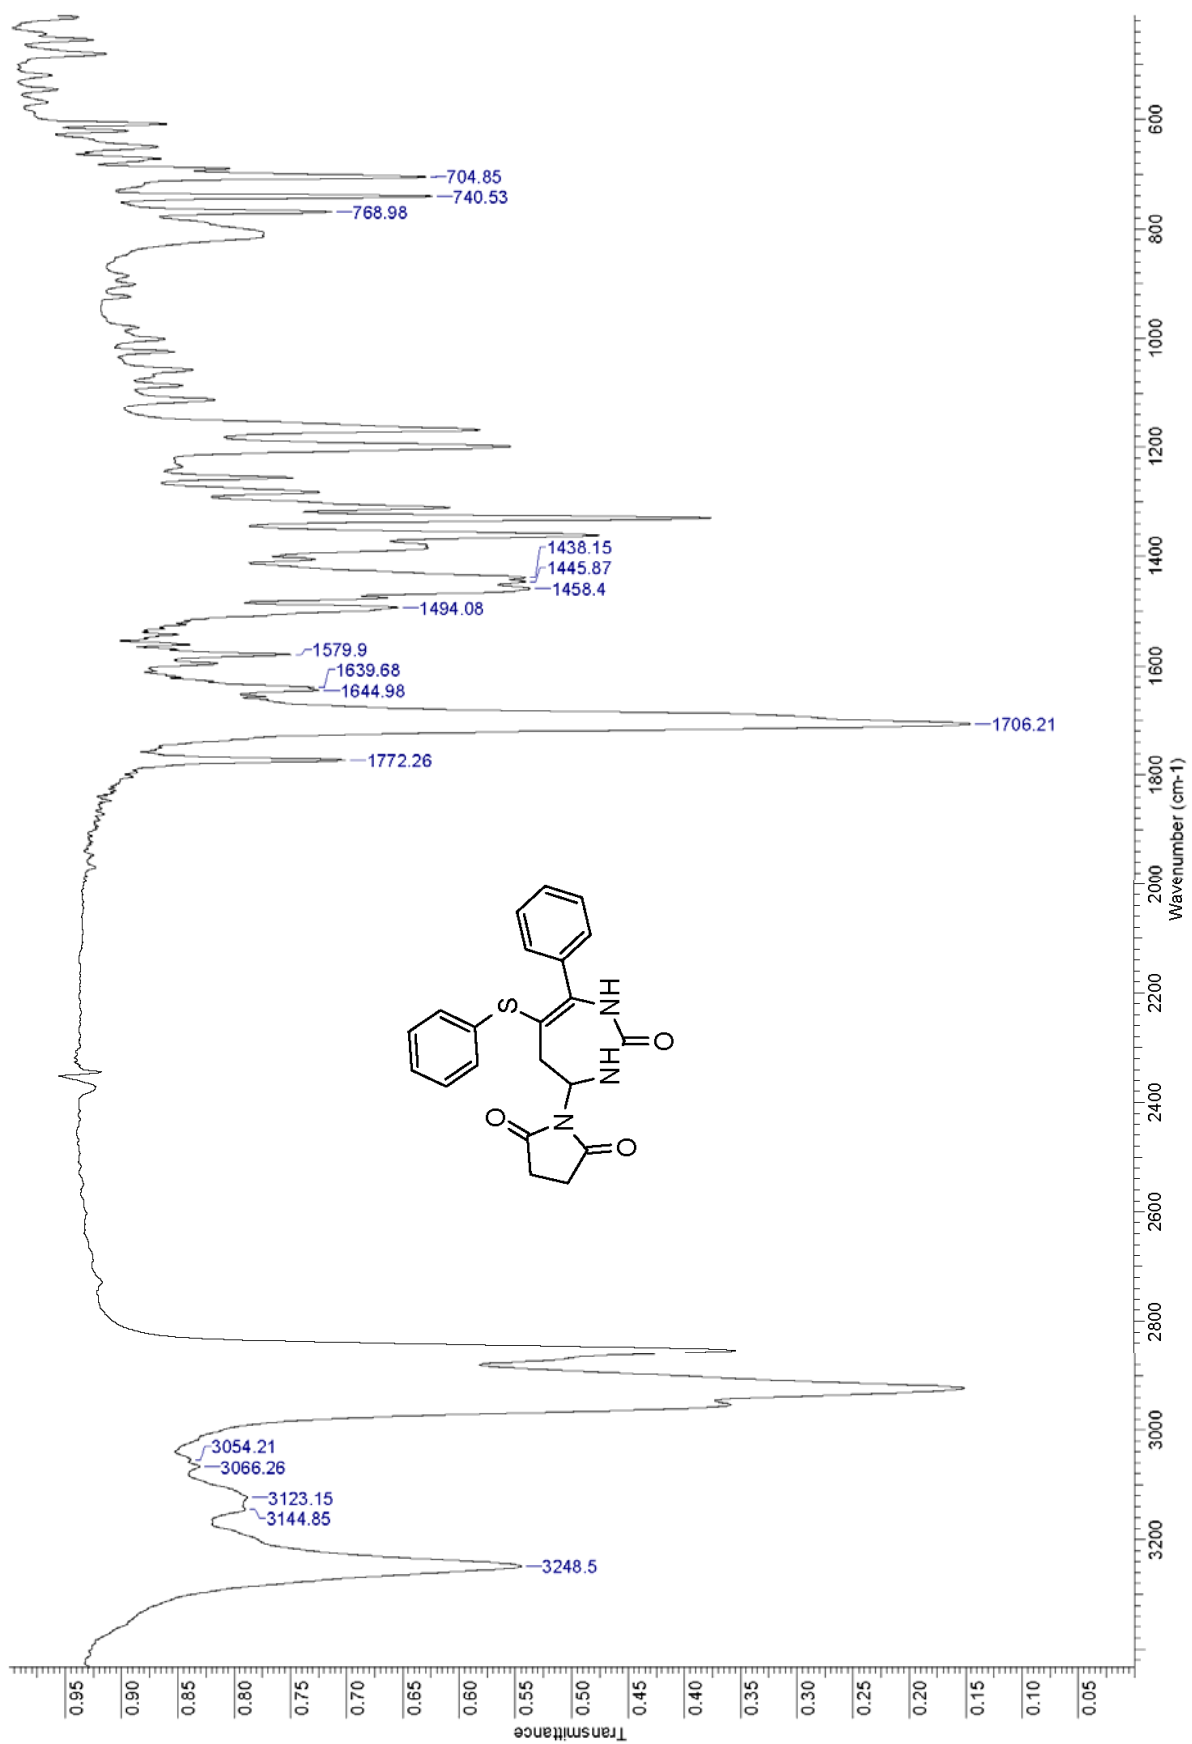

IR spectrum of **18b** (Nujol), Bruker Vector 22

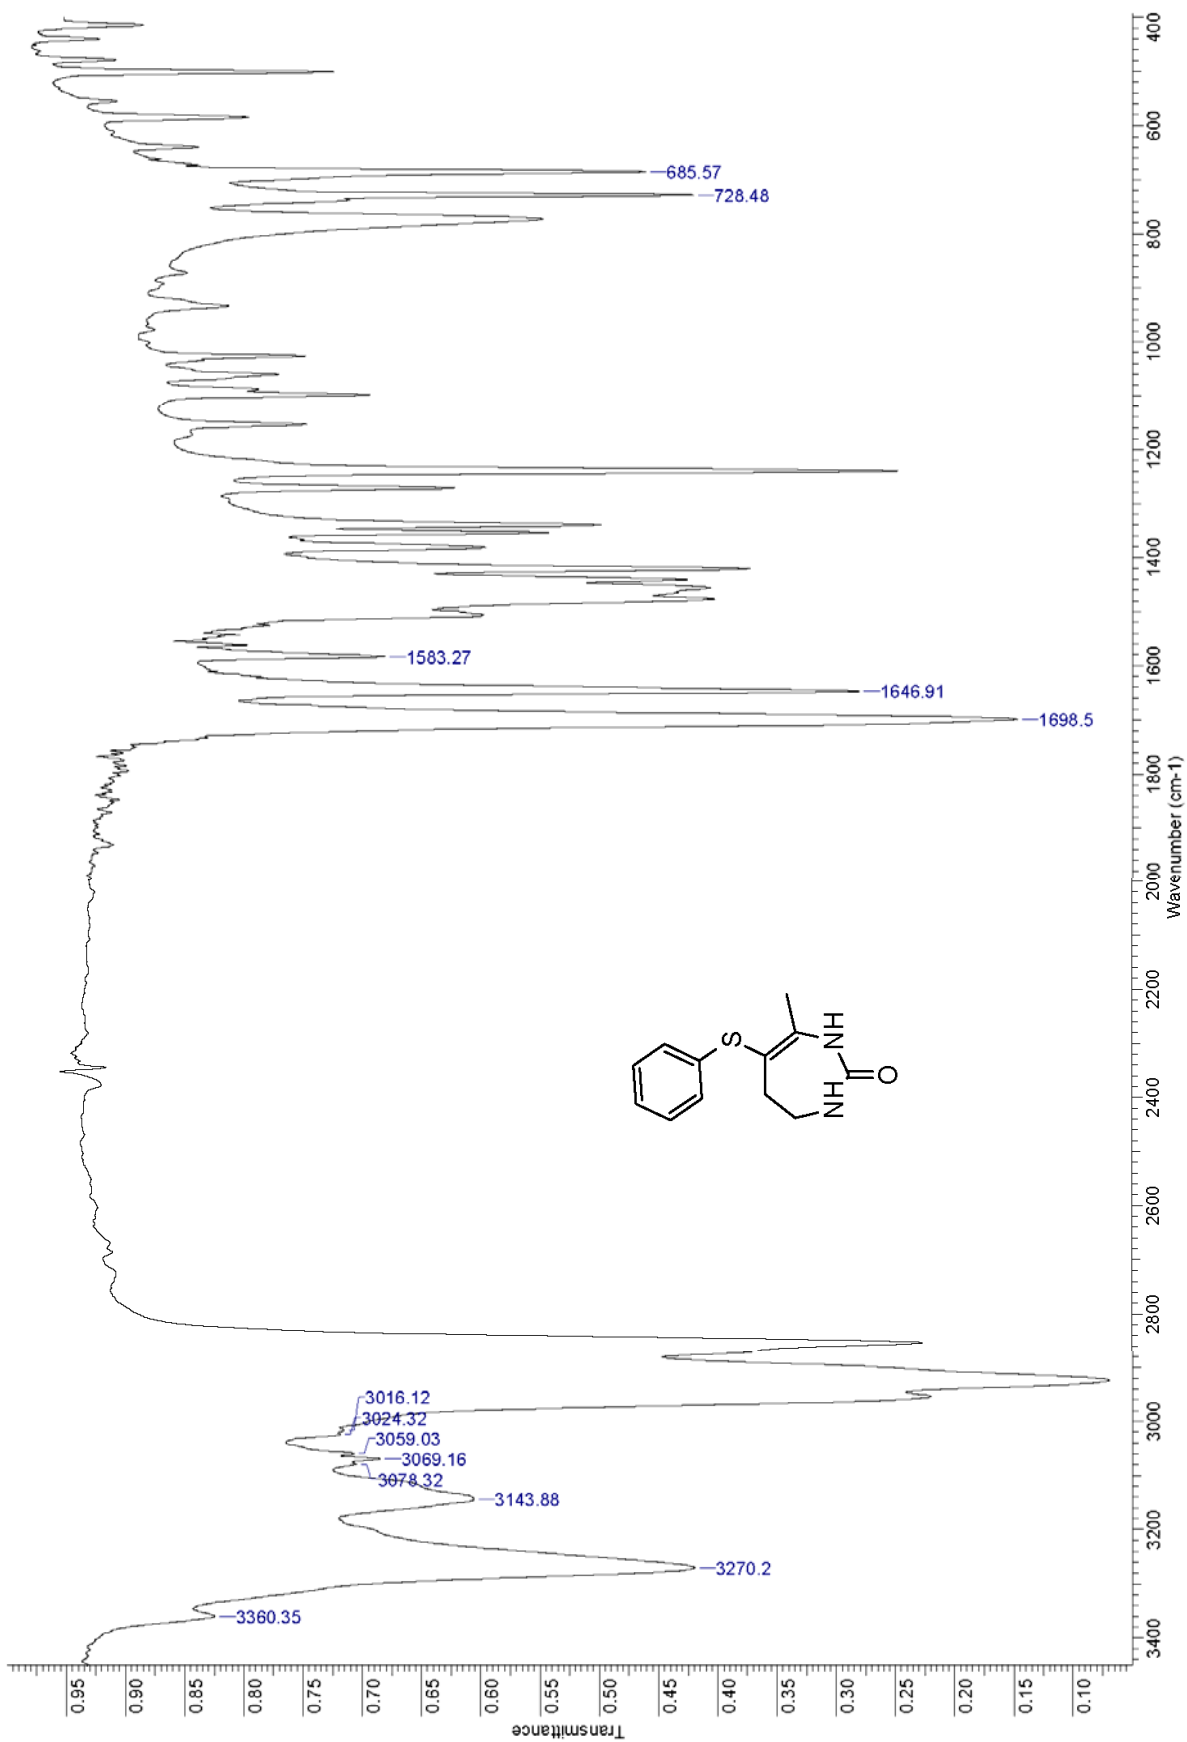

IR spectrum of **19a** (Nujol), Bruker Vector 22

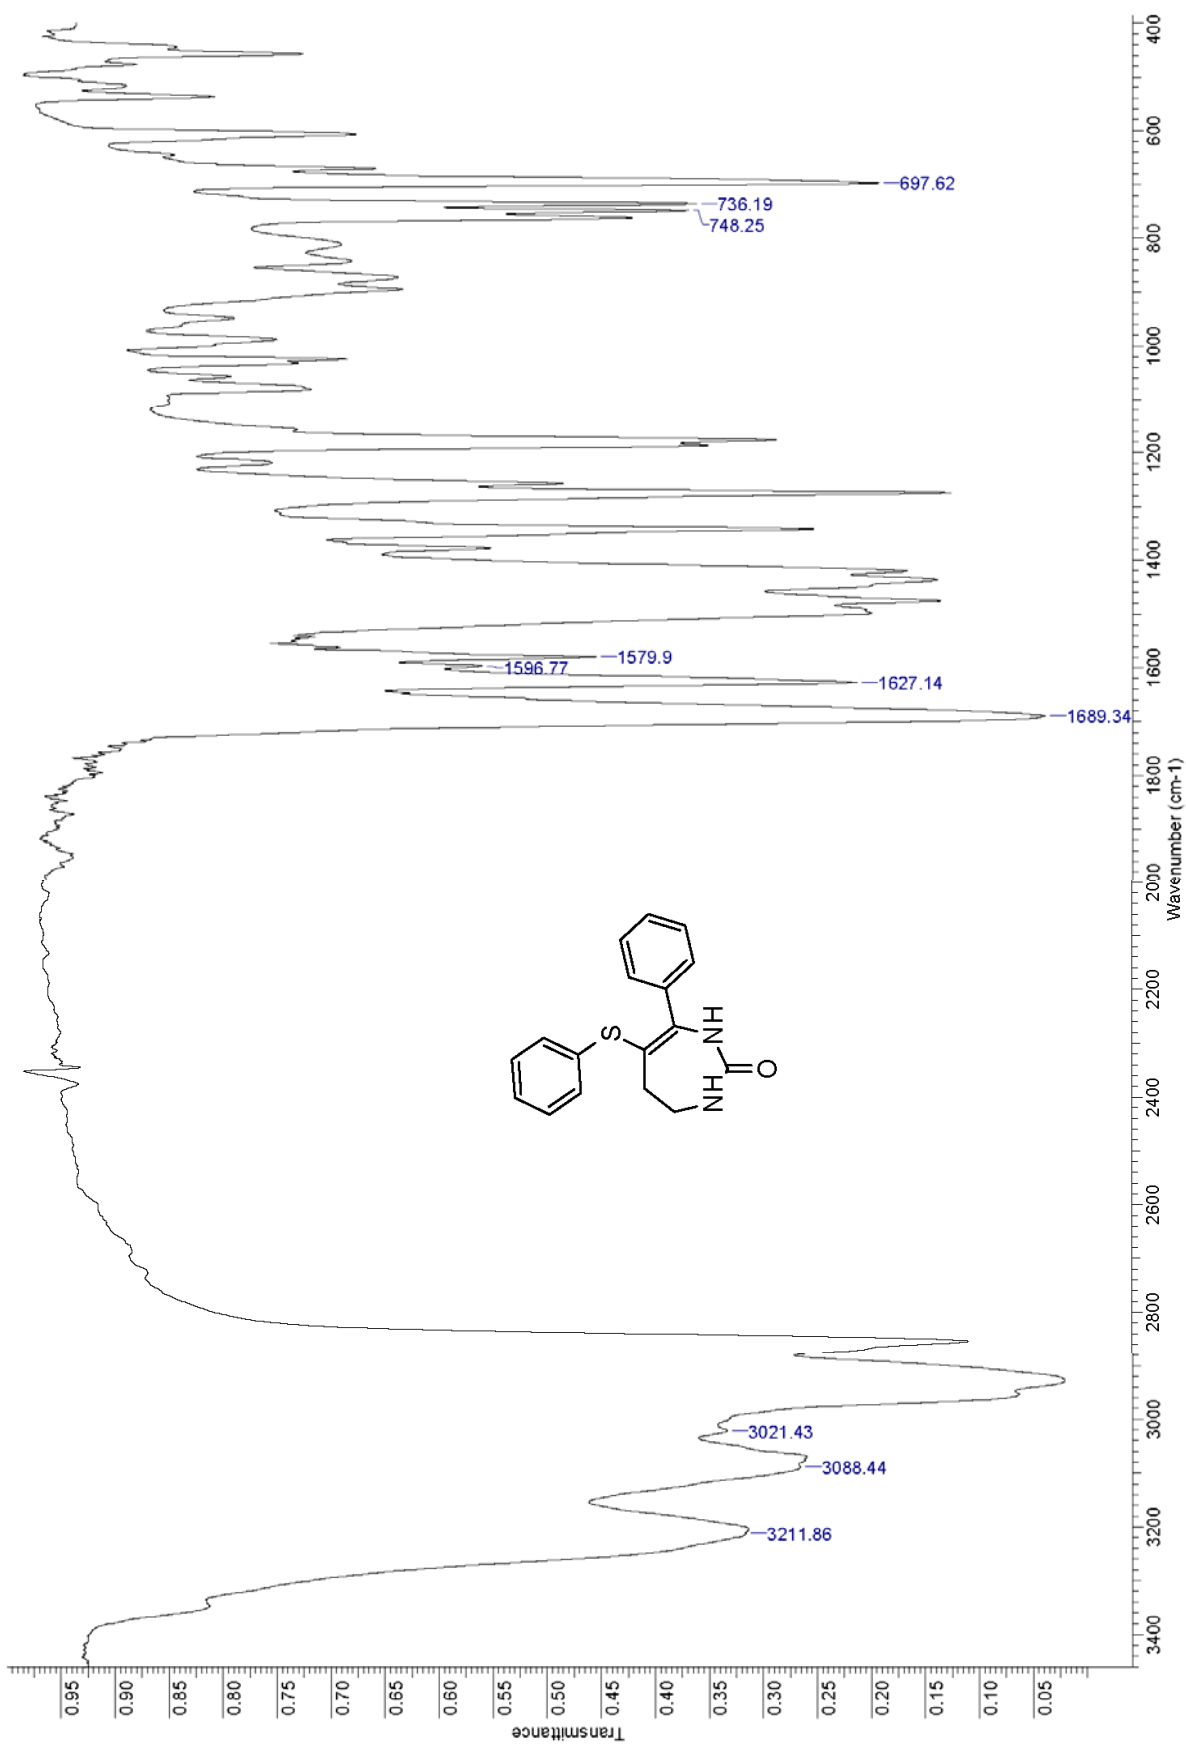

IR spectrum of **19b** (Nujol), Bruker Vector 22

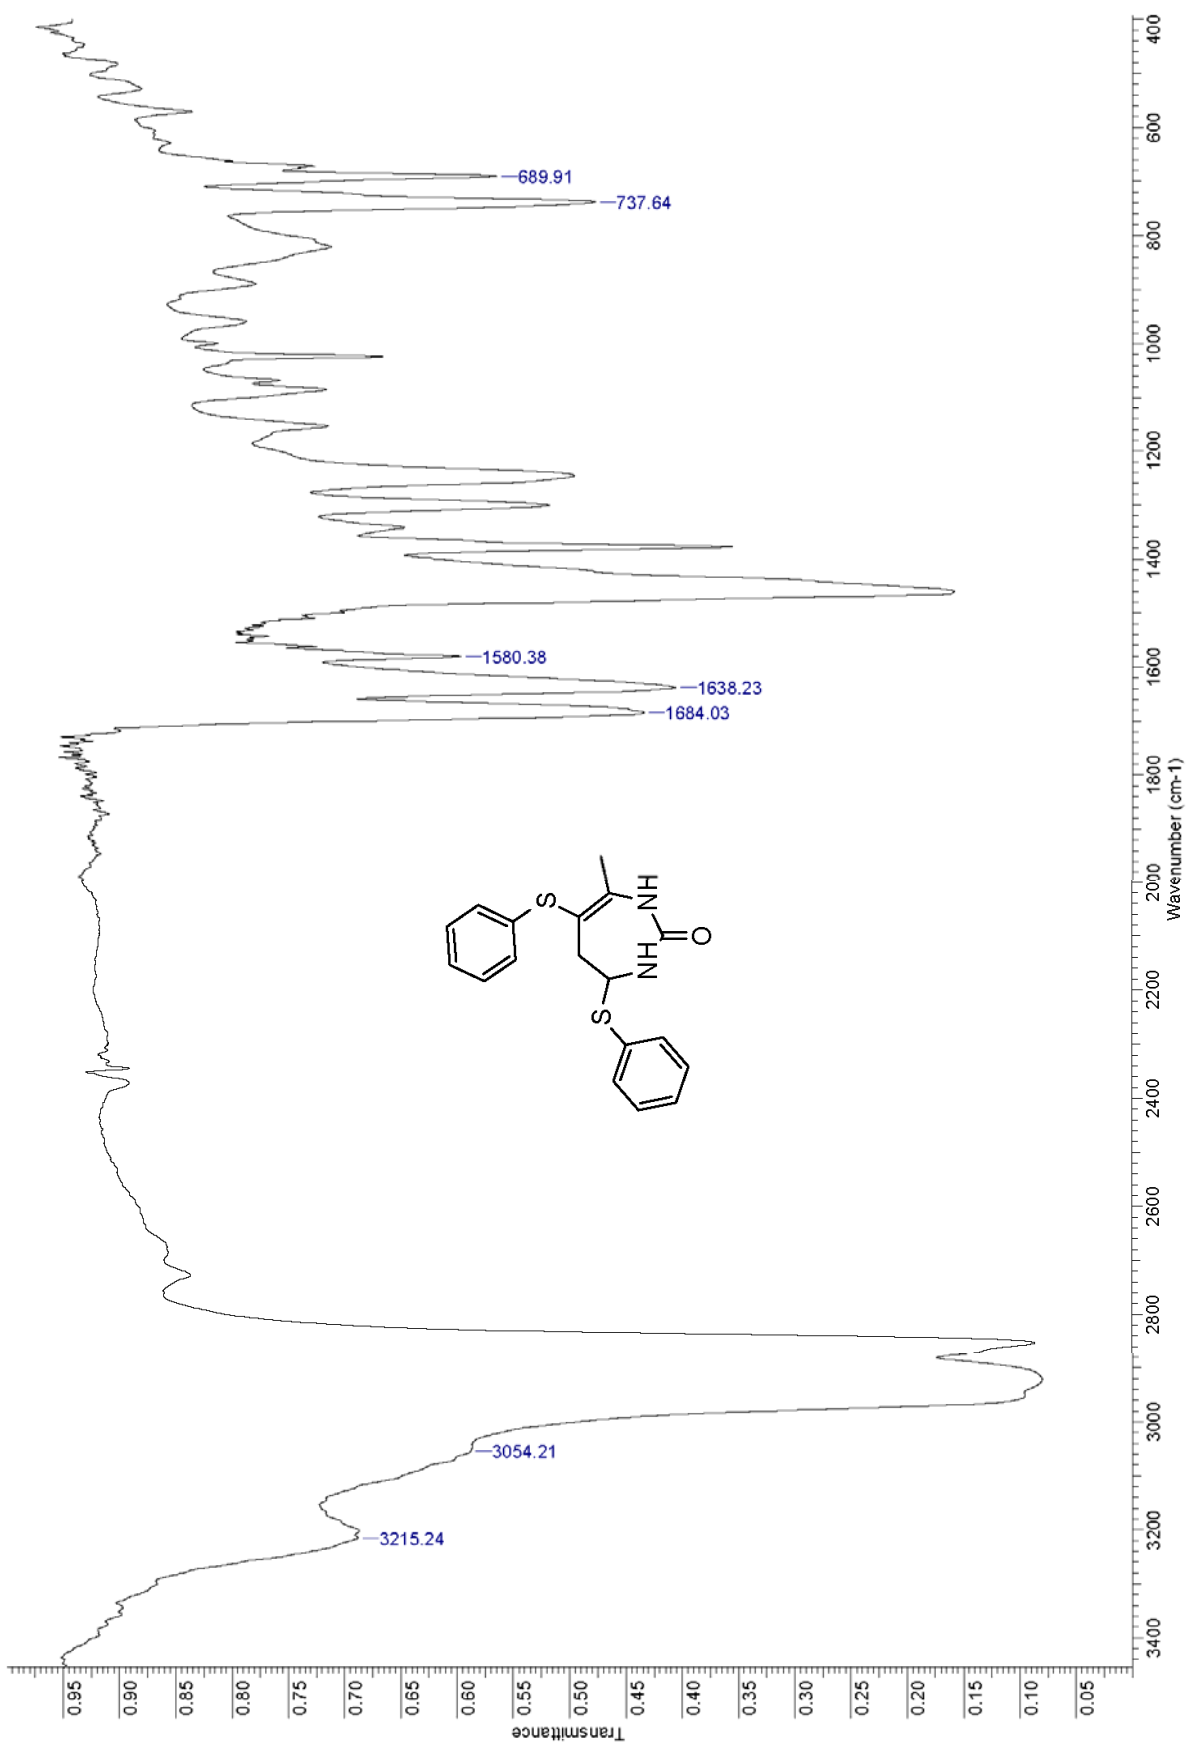

IR spectrum of 20a (Nujol), Bruker Vector 22

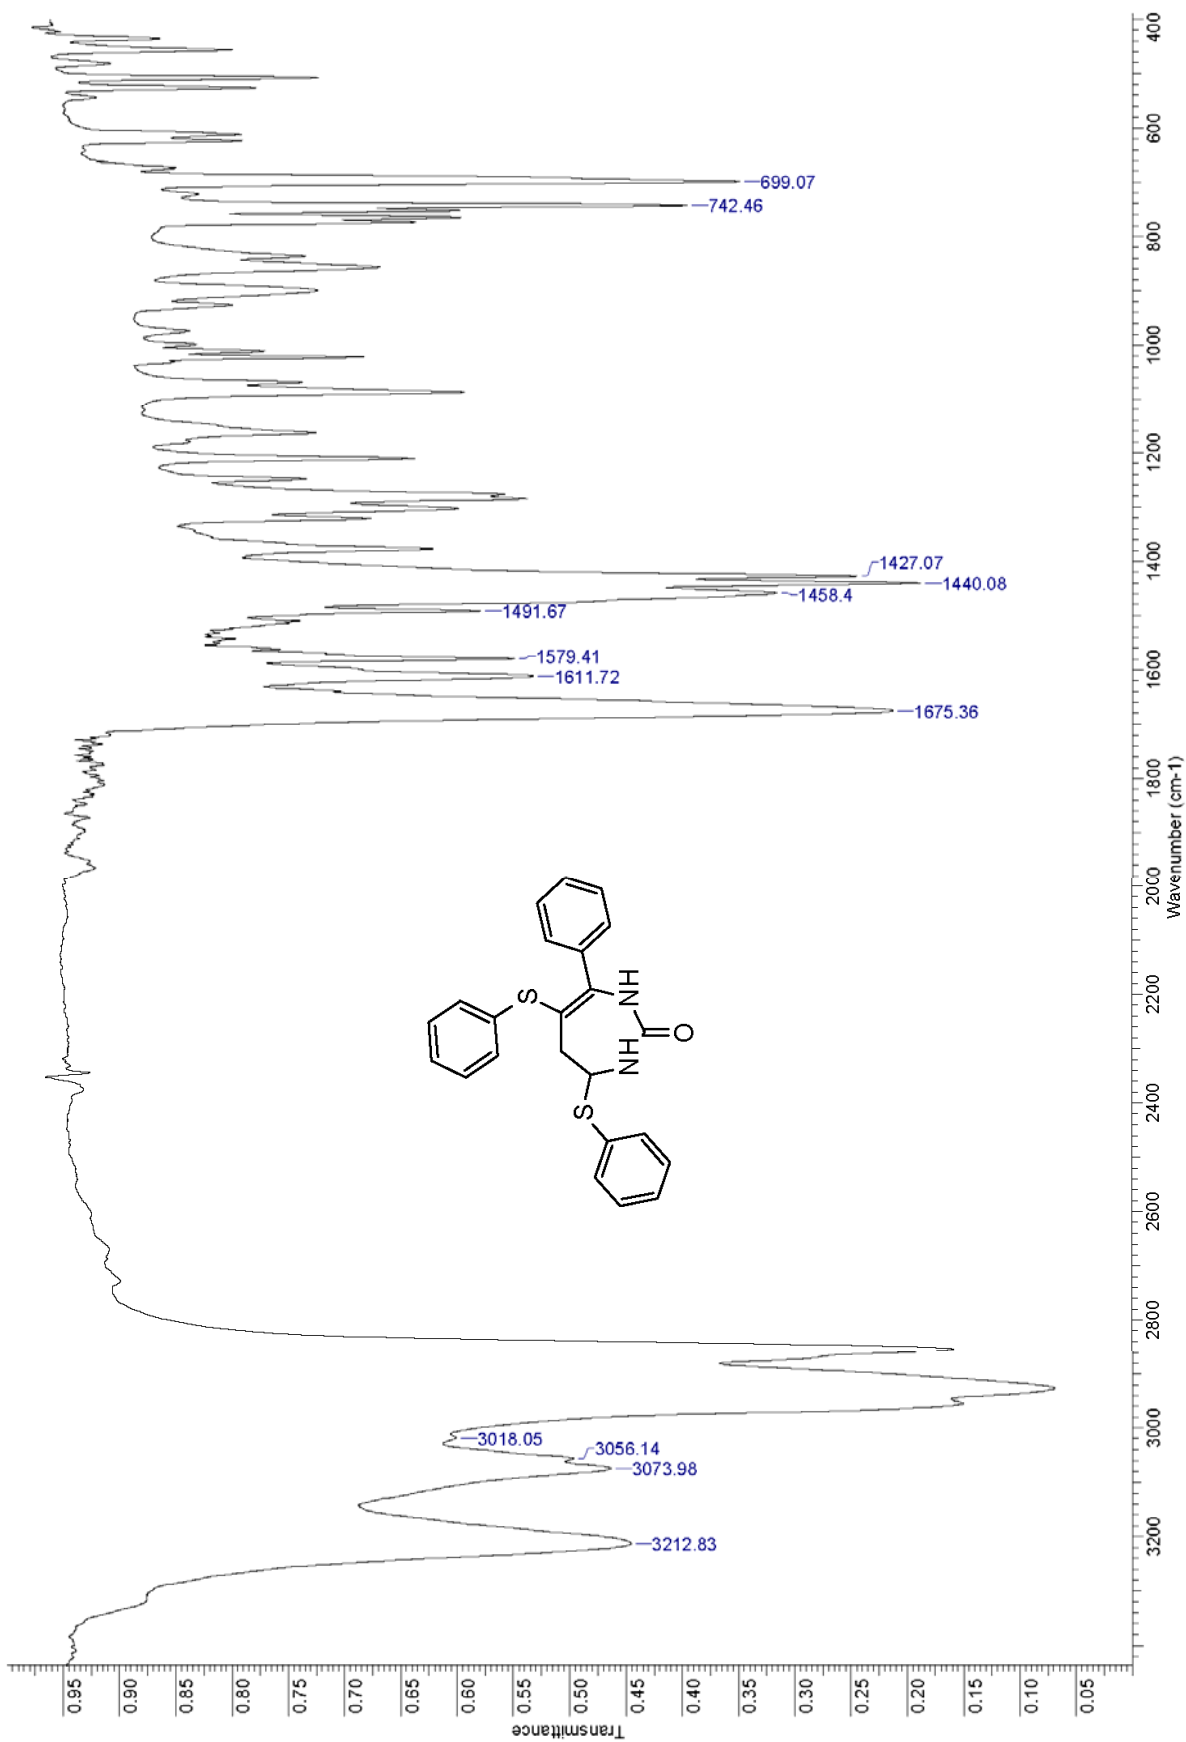

IR spectrum of **20b** (Nujol), Bruker Vector 22

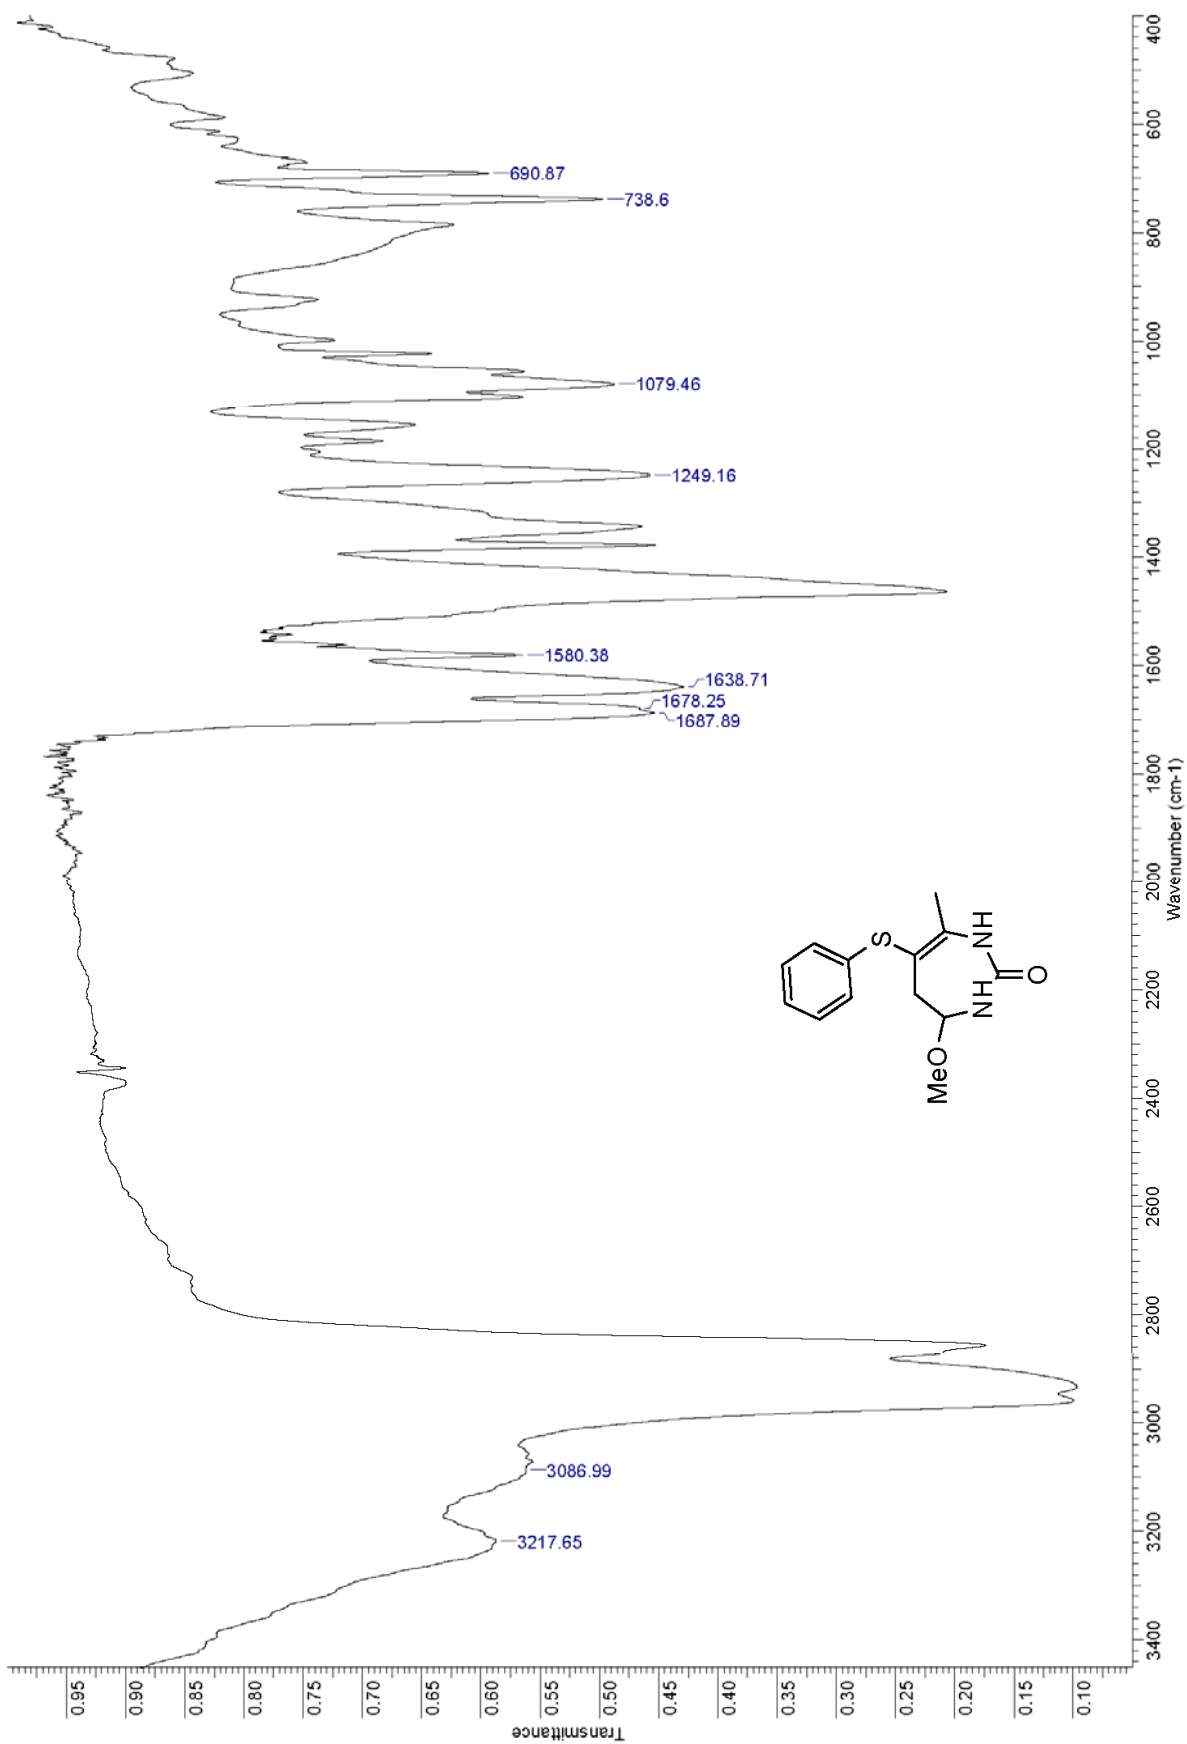

IR spectrum of **24a** (Nujol), Bruker Vector 22

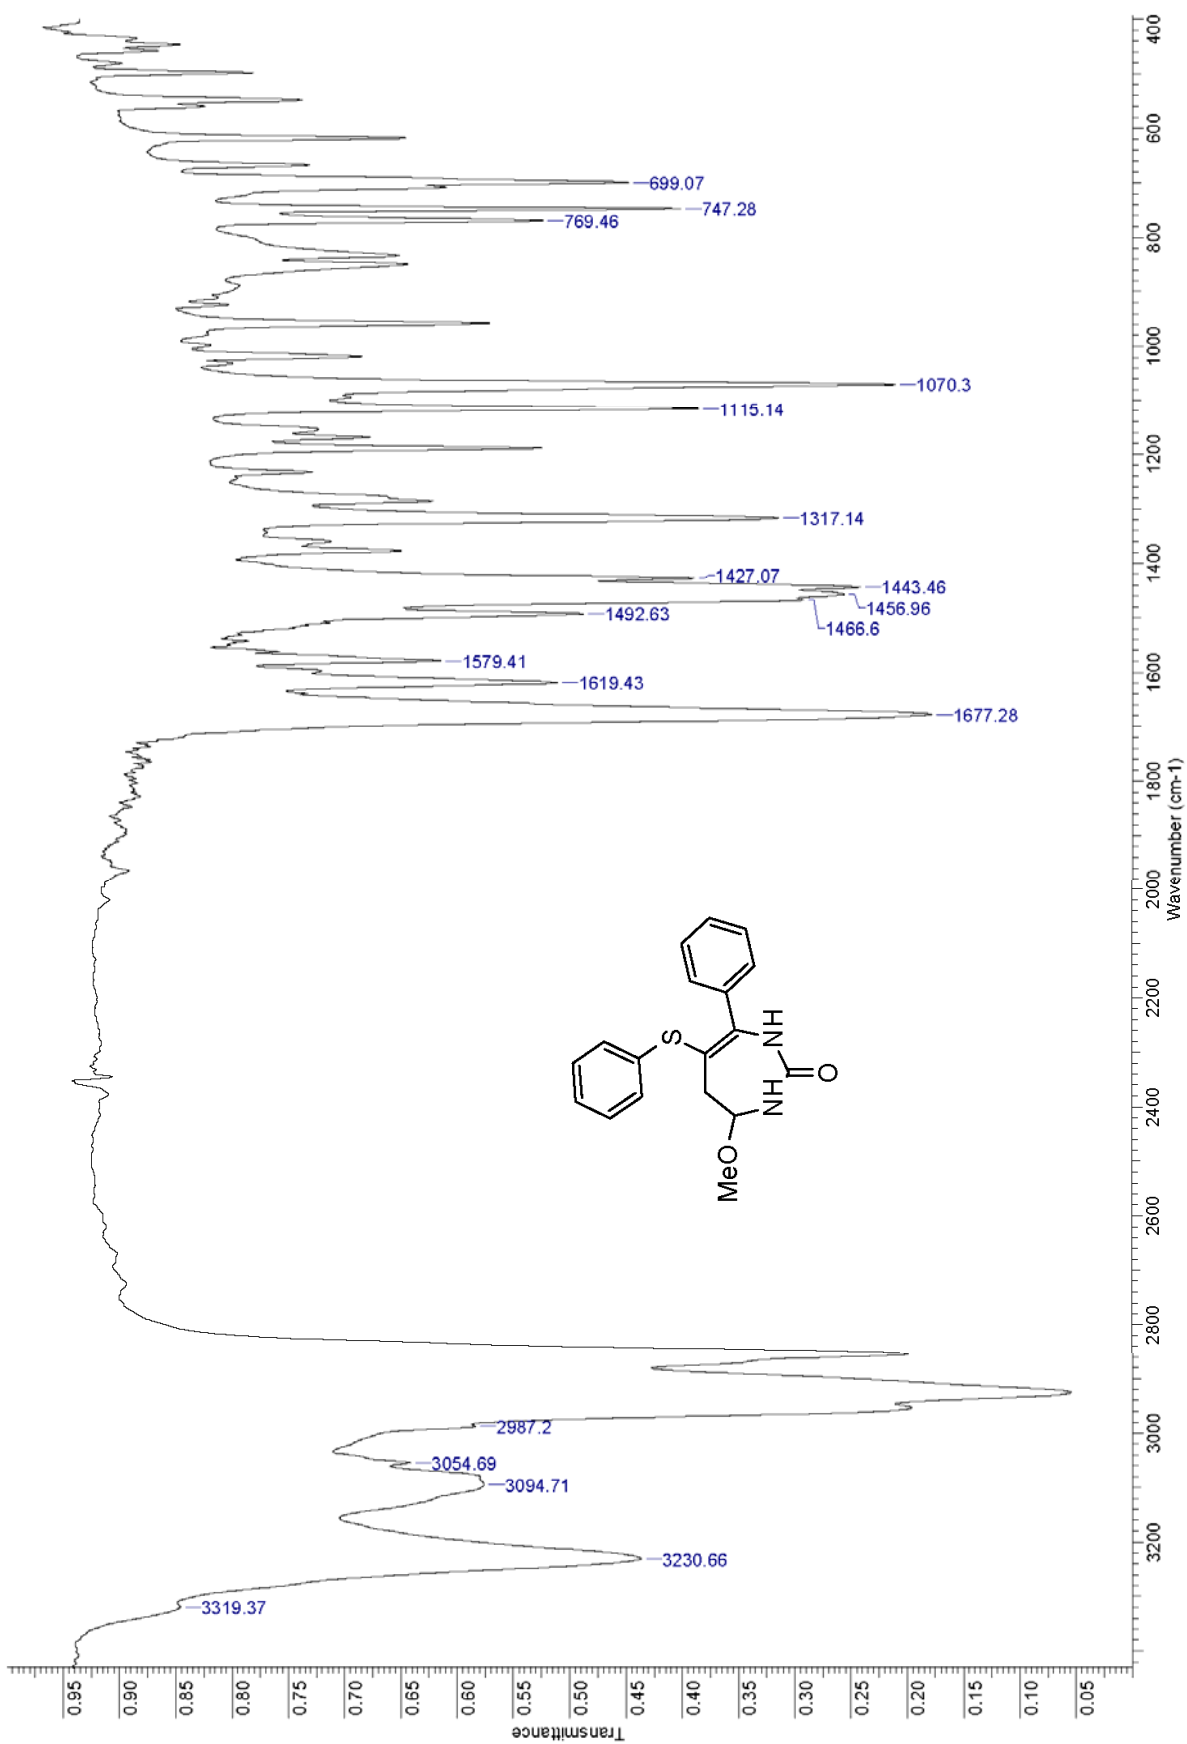

IR spectrum of **24b** (Nujol), Bruker Vector 22



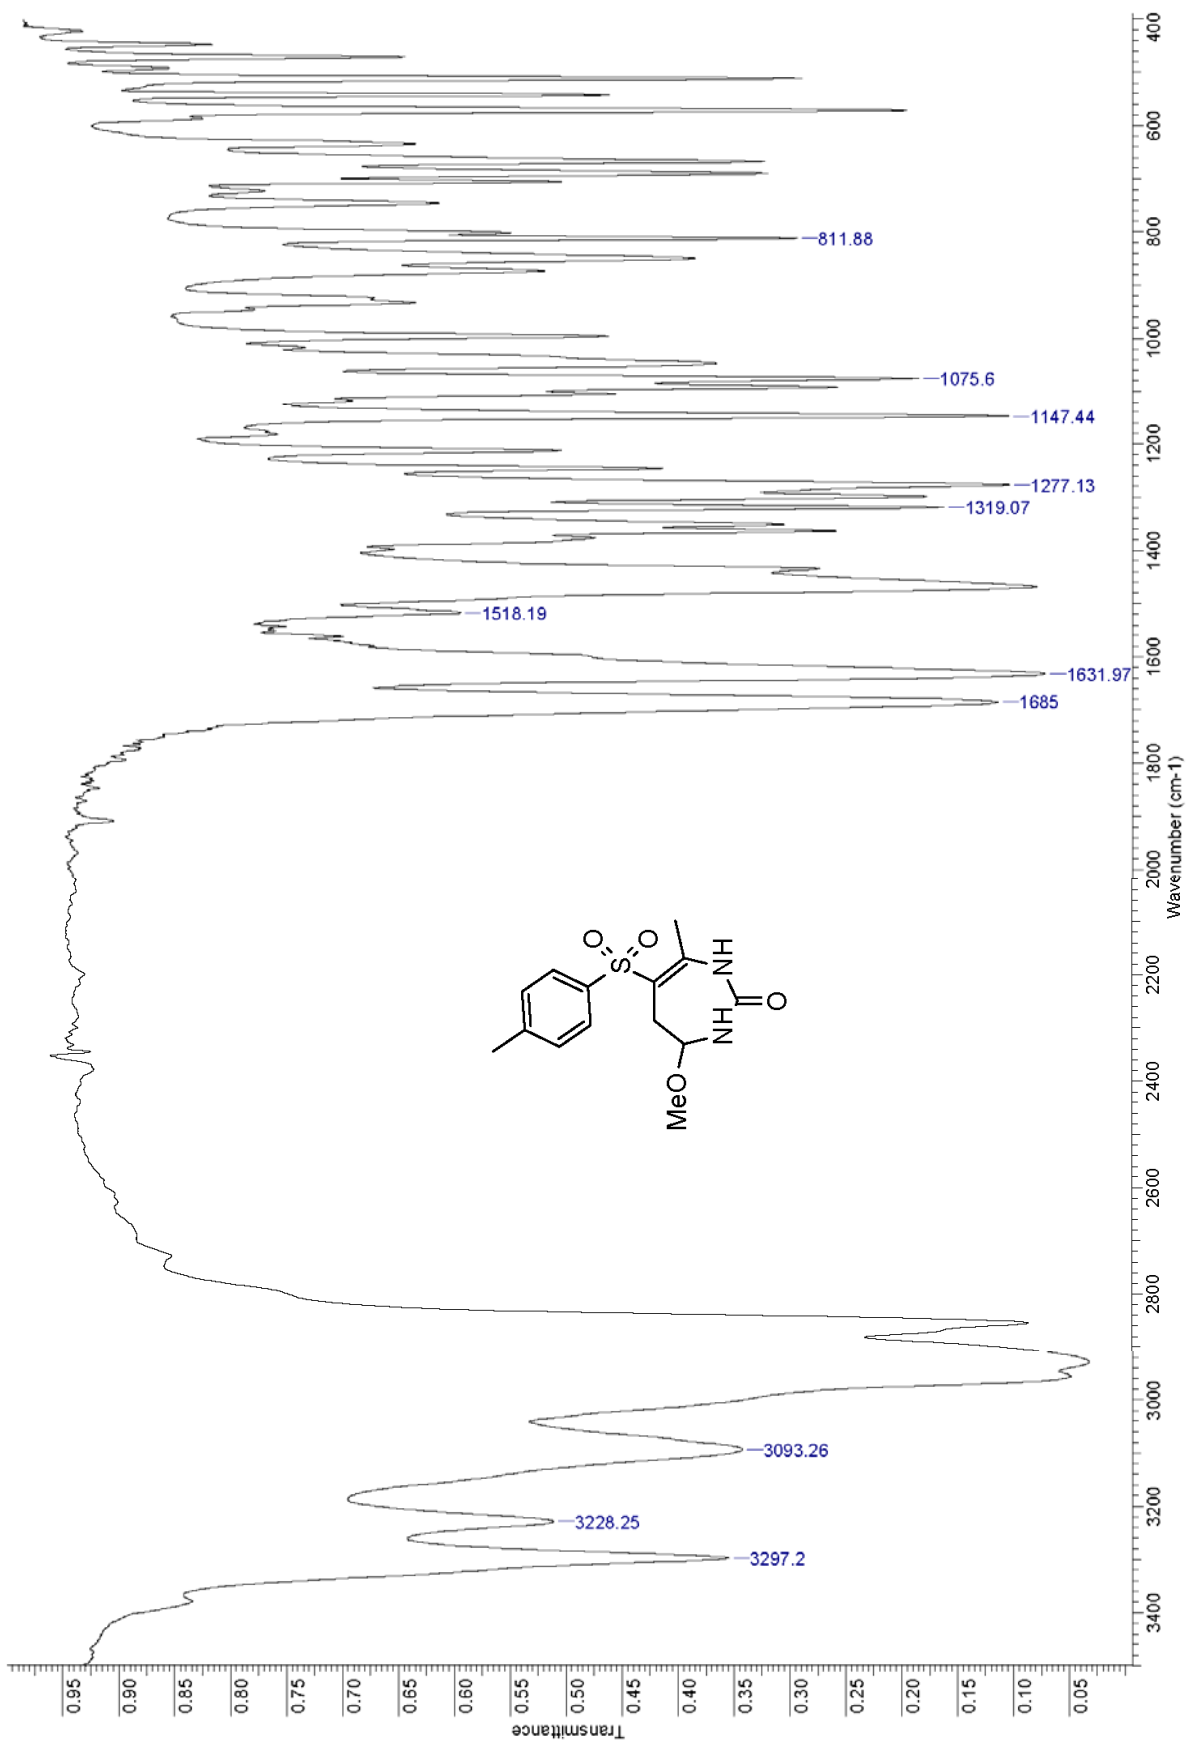

IR spectrum of **24c** (Nujol), Bruker Vector 22

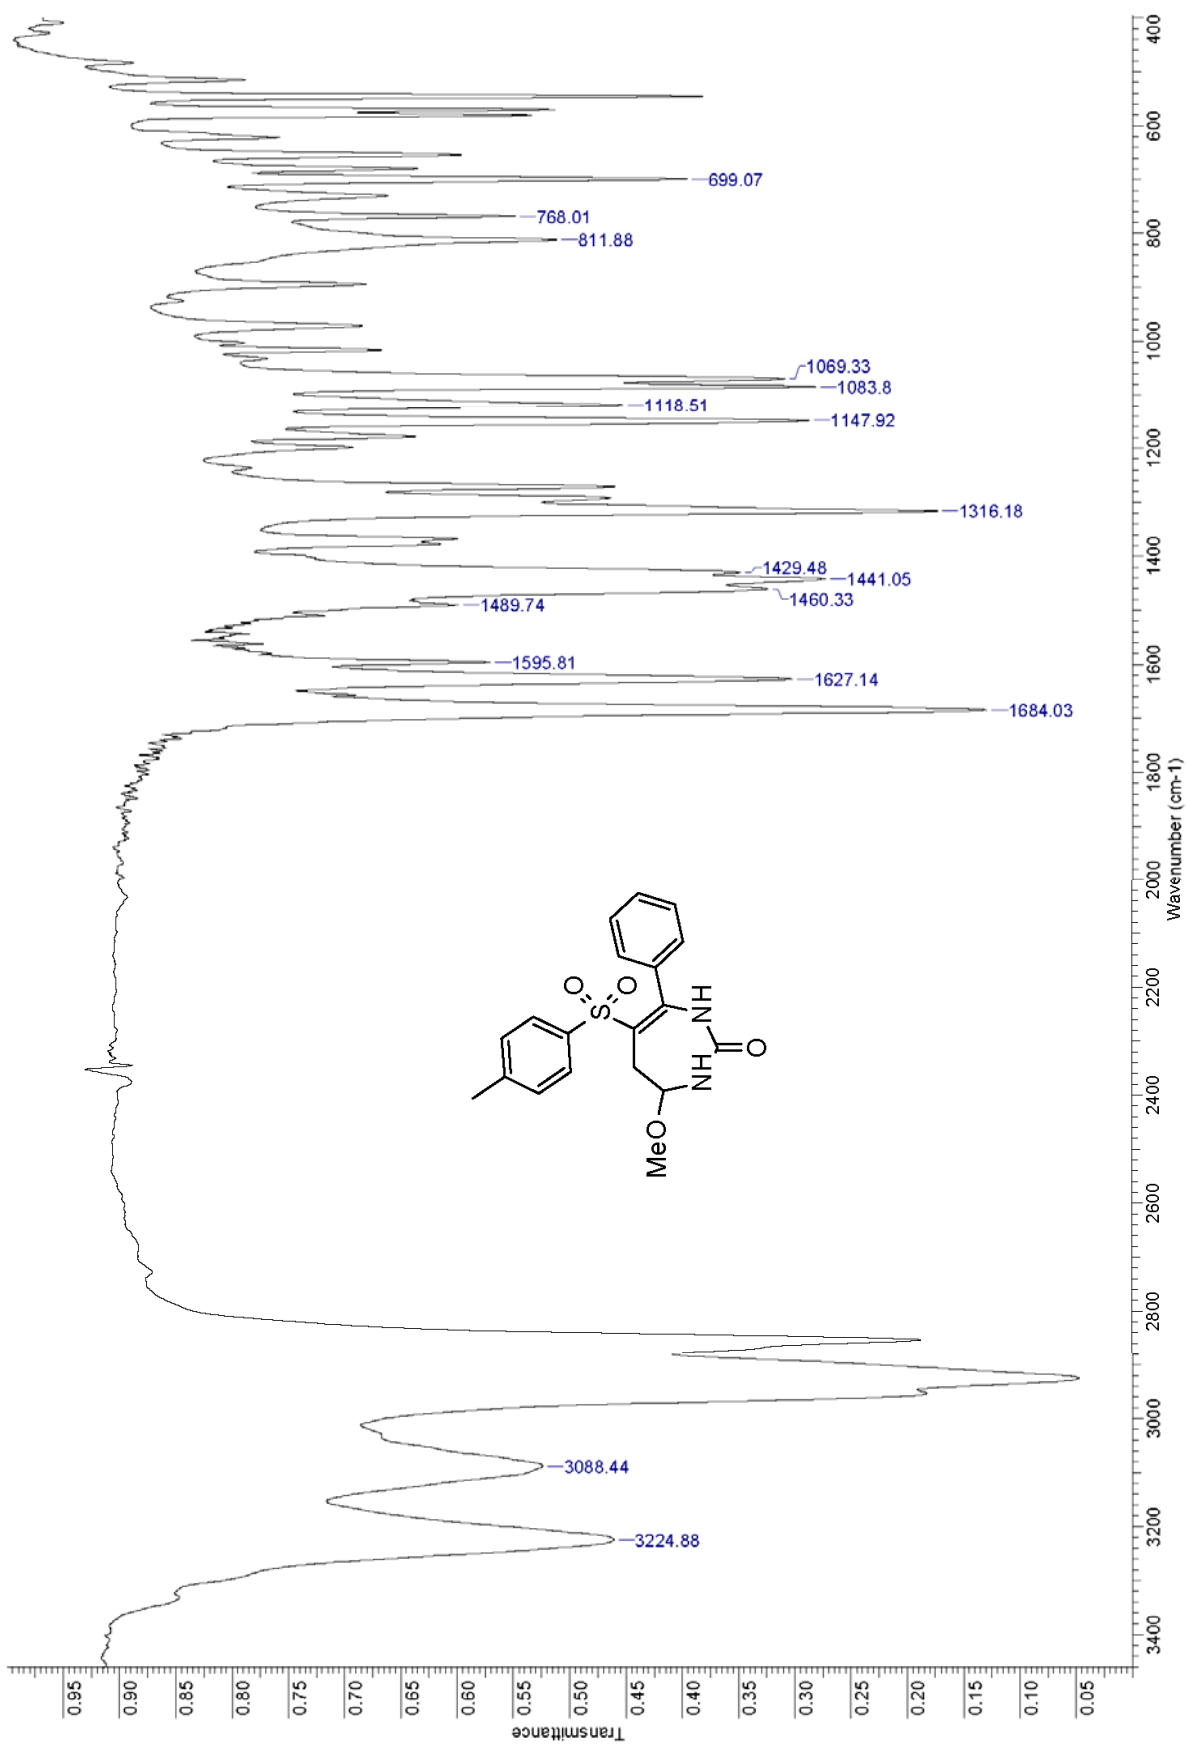

IR spectrum of **24d** (Nujol), Bruker Vector 22

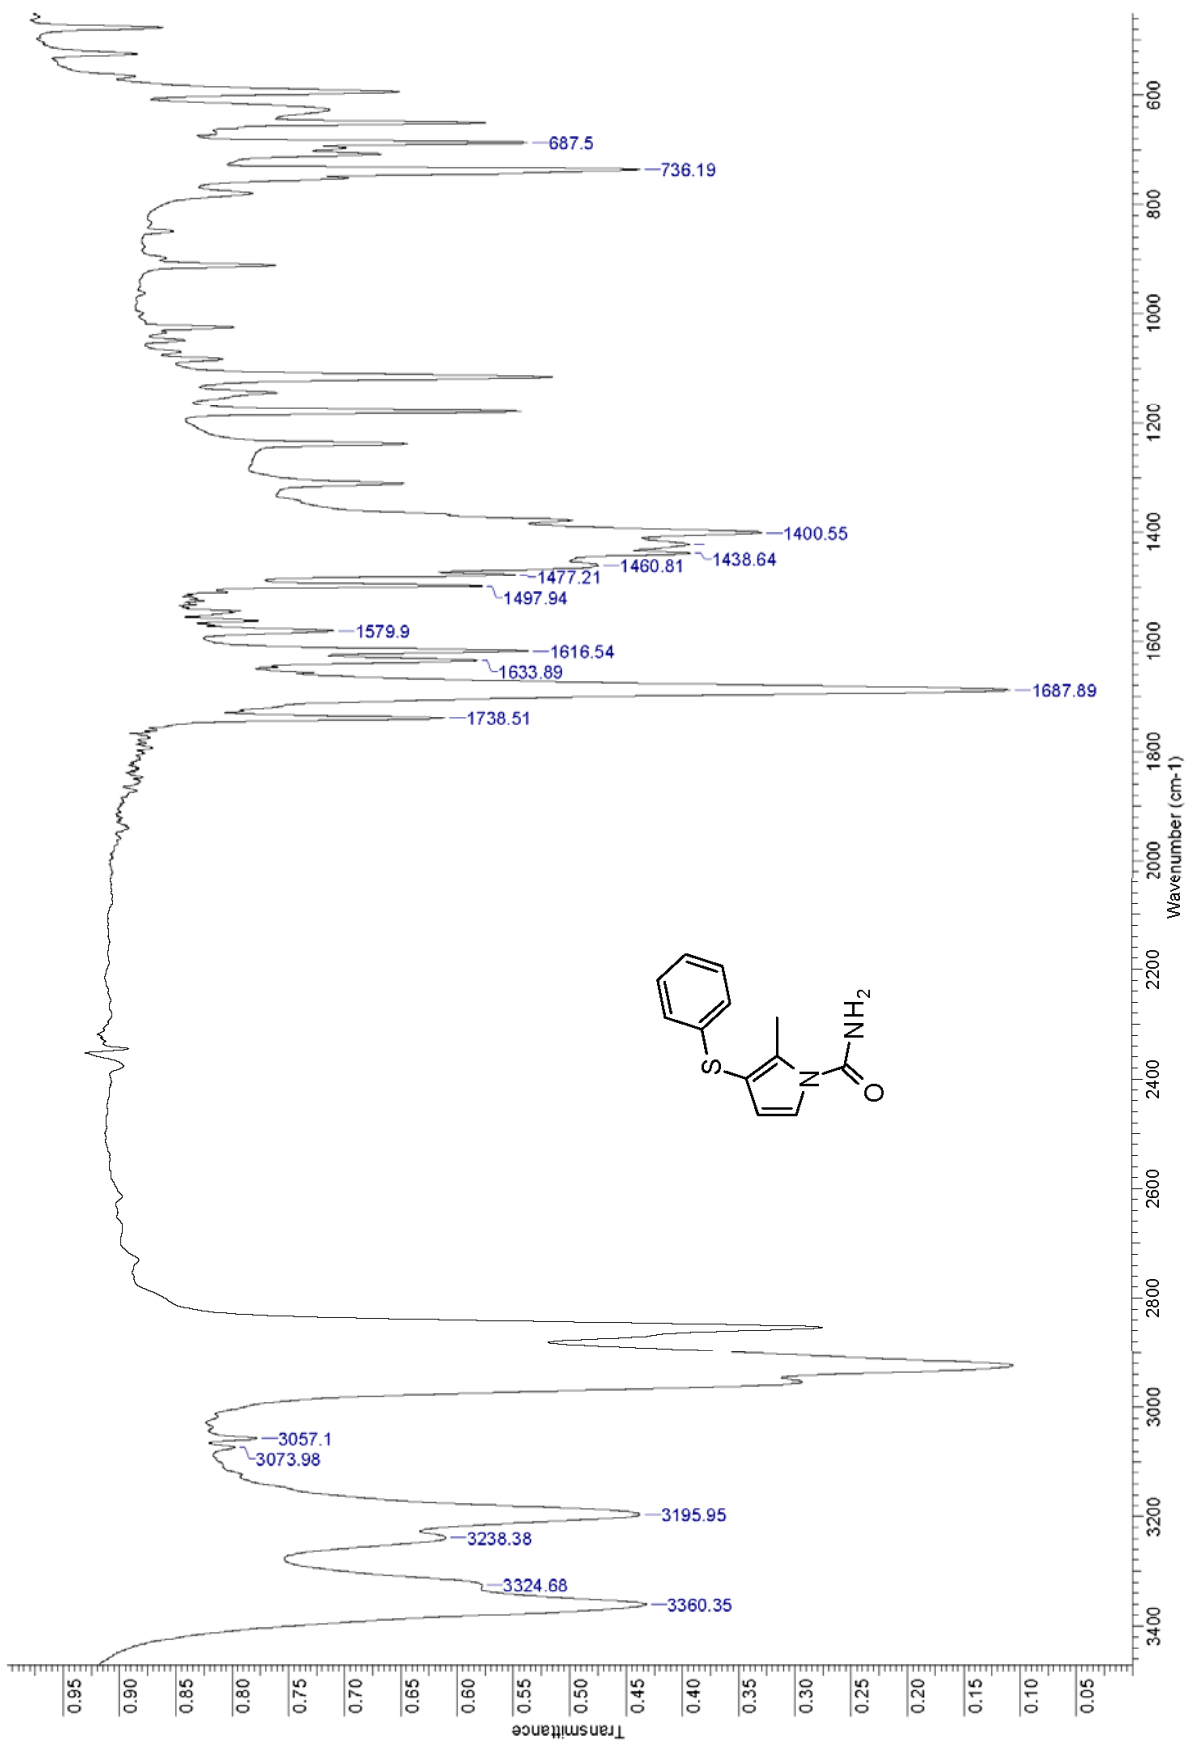

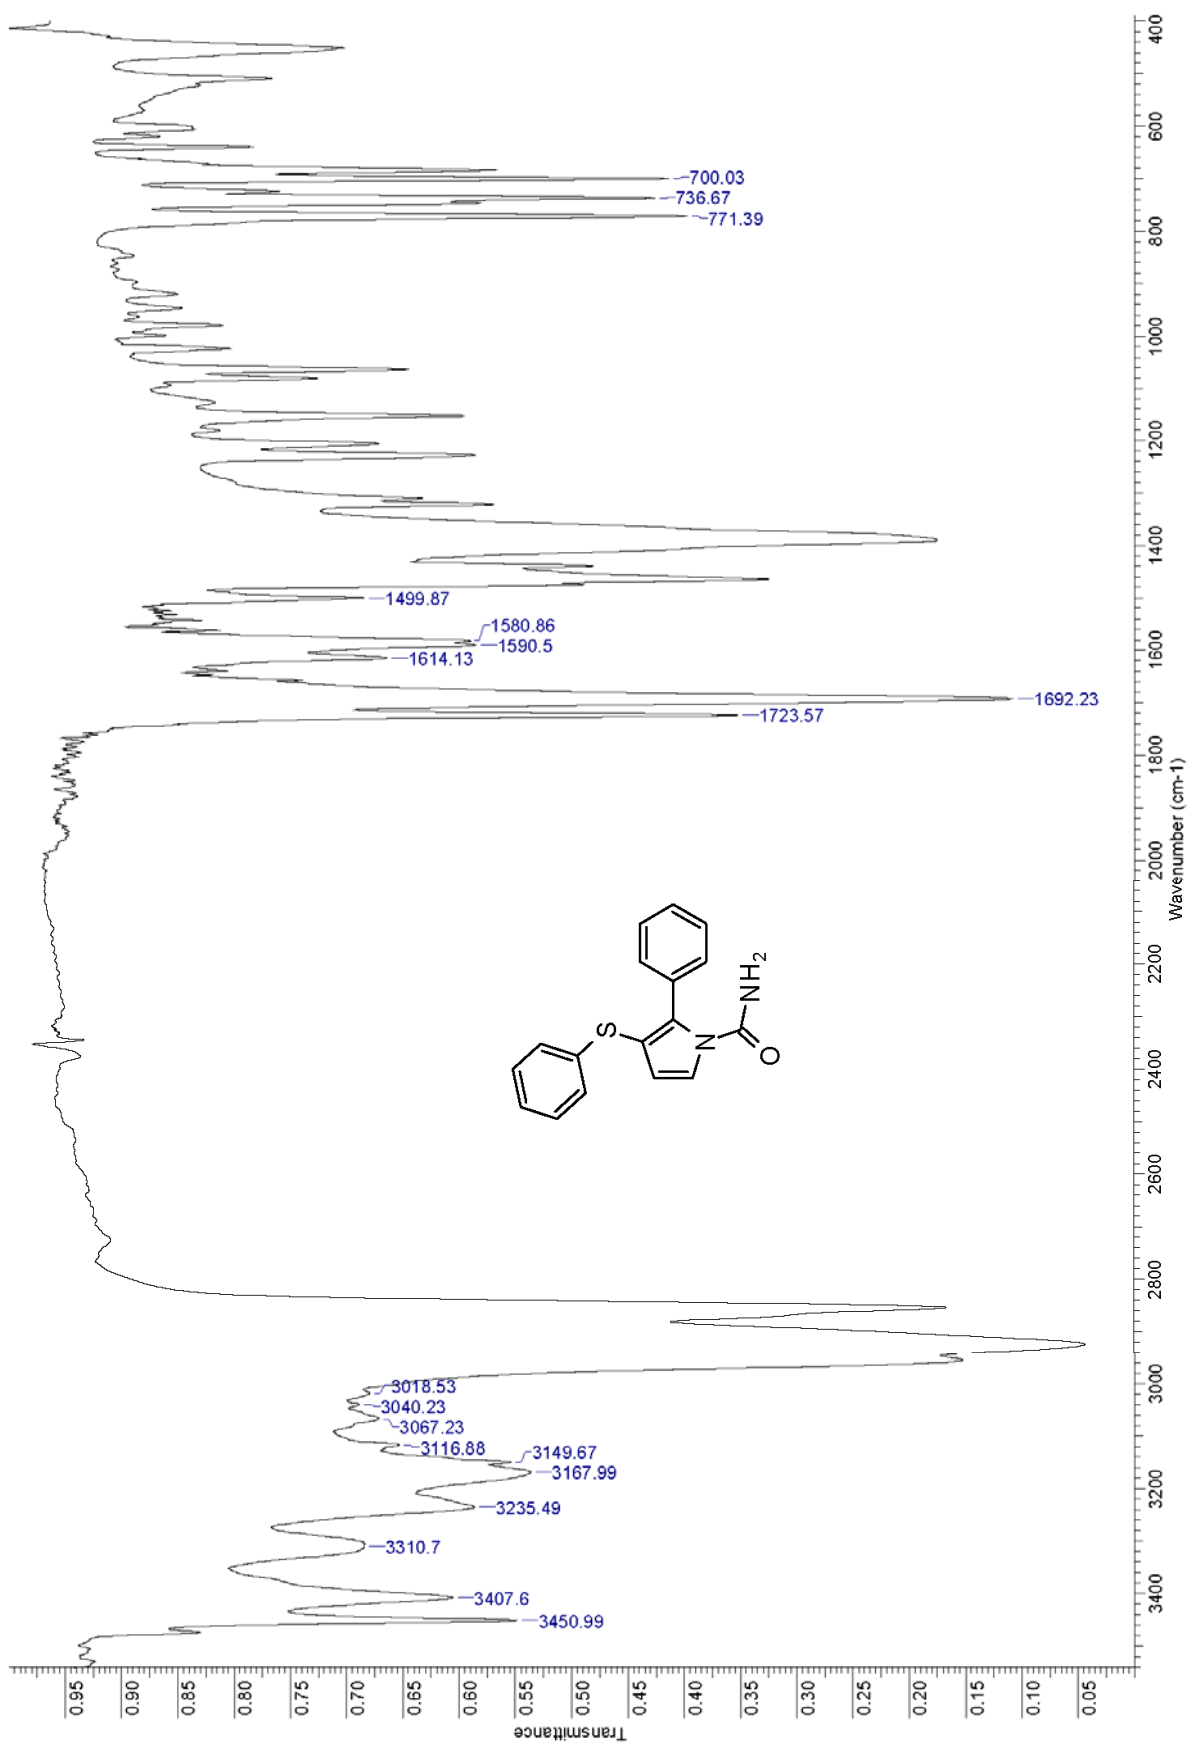

IR spectrum of **25b** (Nujol), Bruker Vector 22

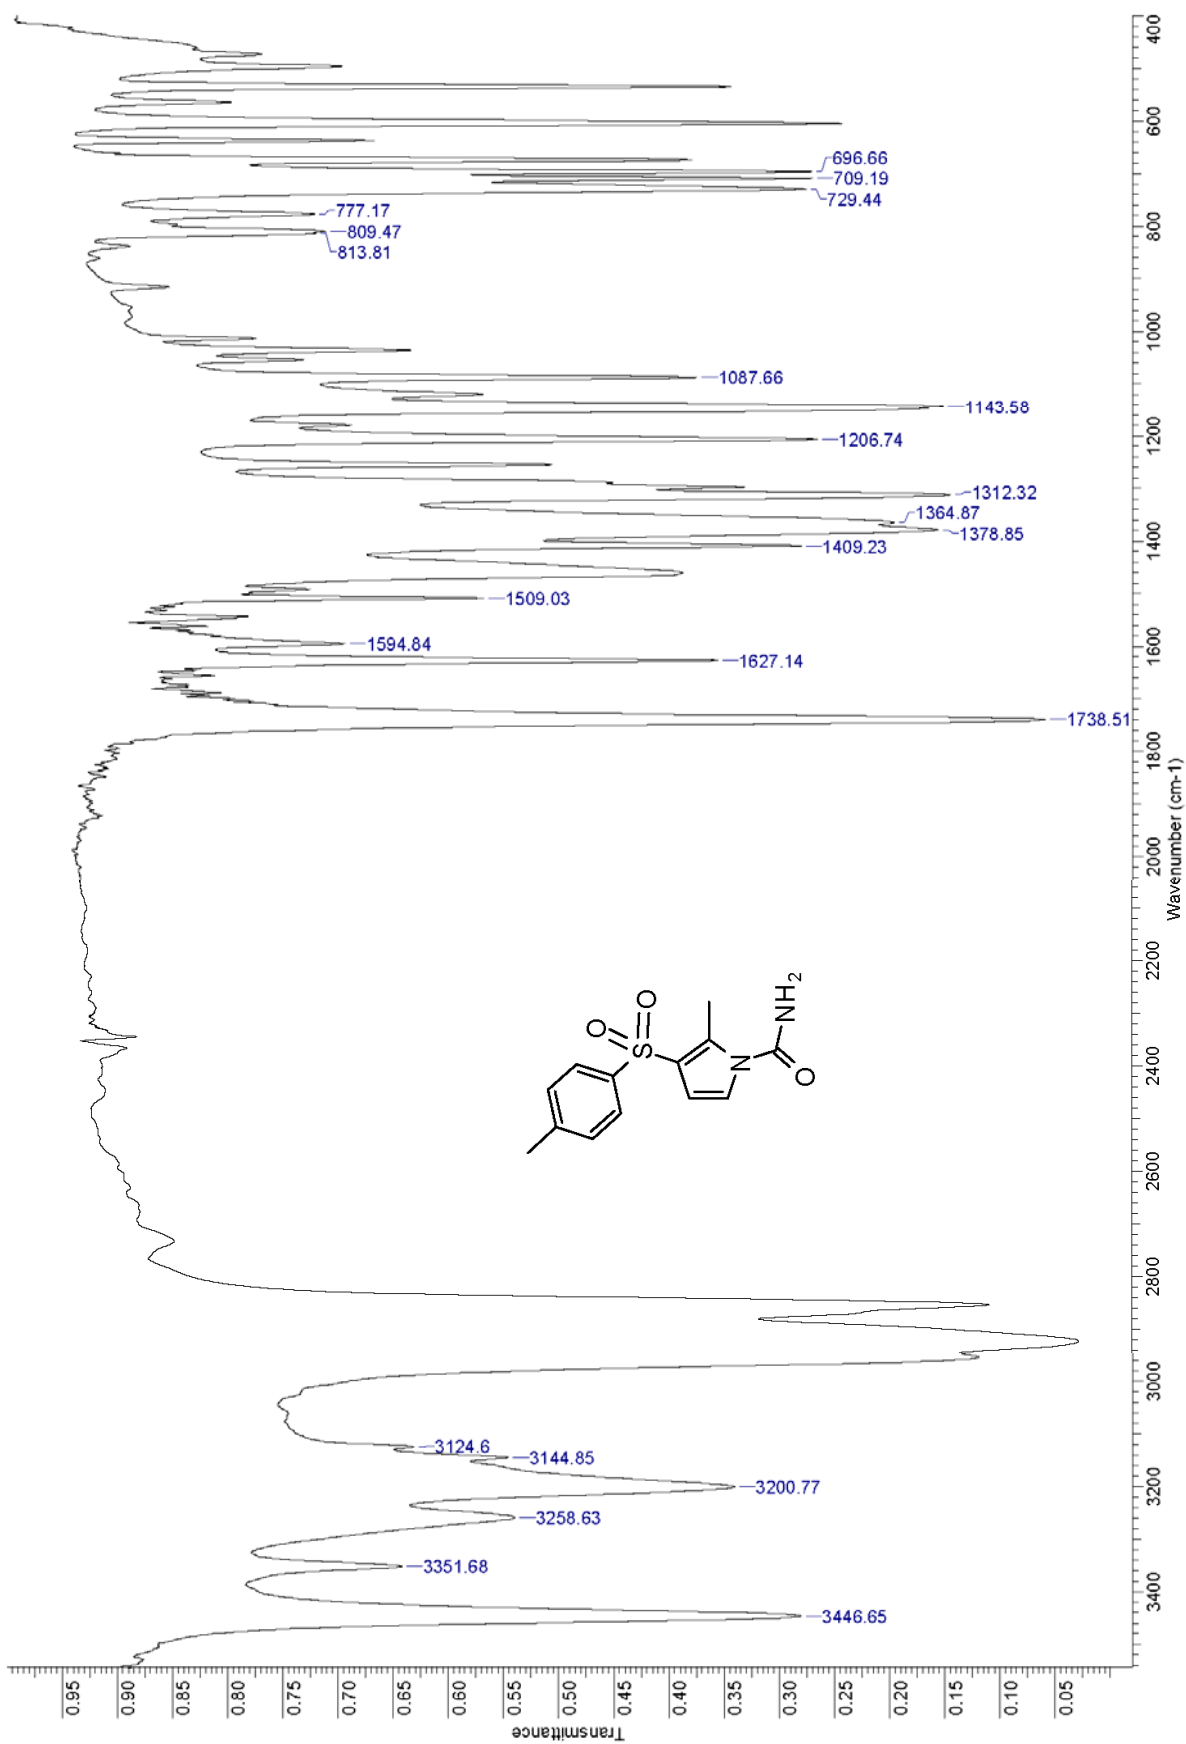

IR spectrum of **25c** (Nujol), Bruker Vector 22

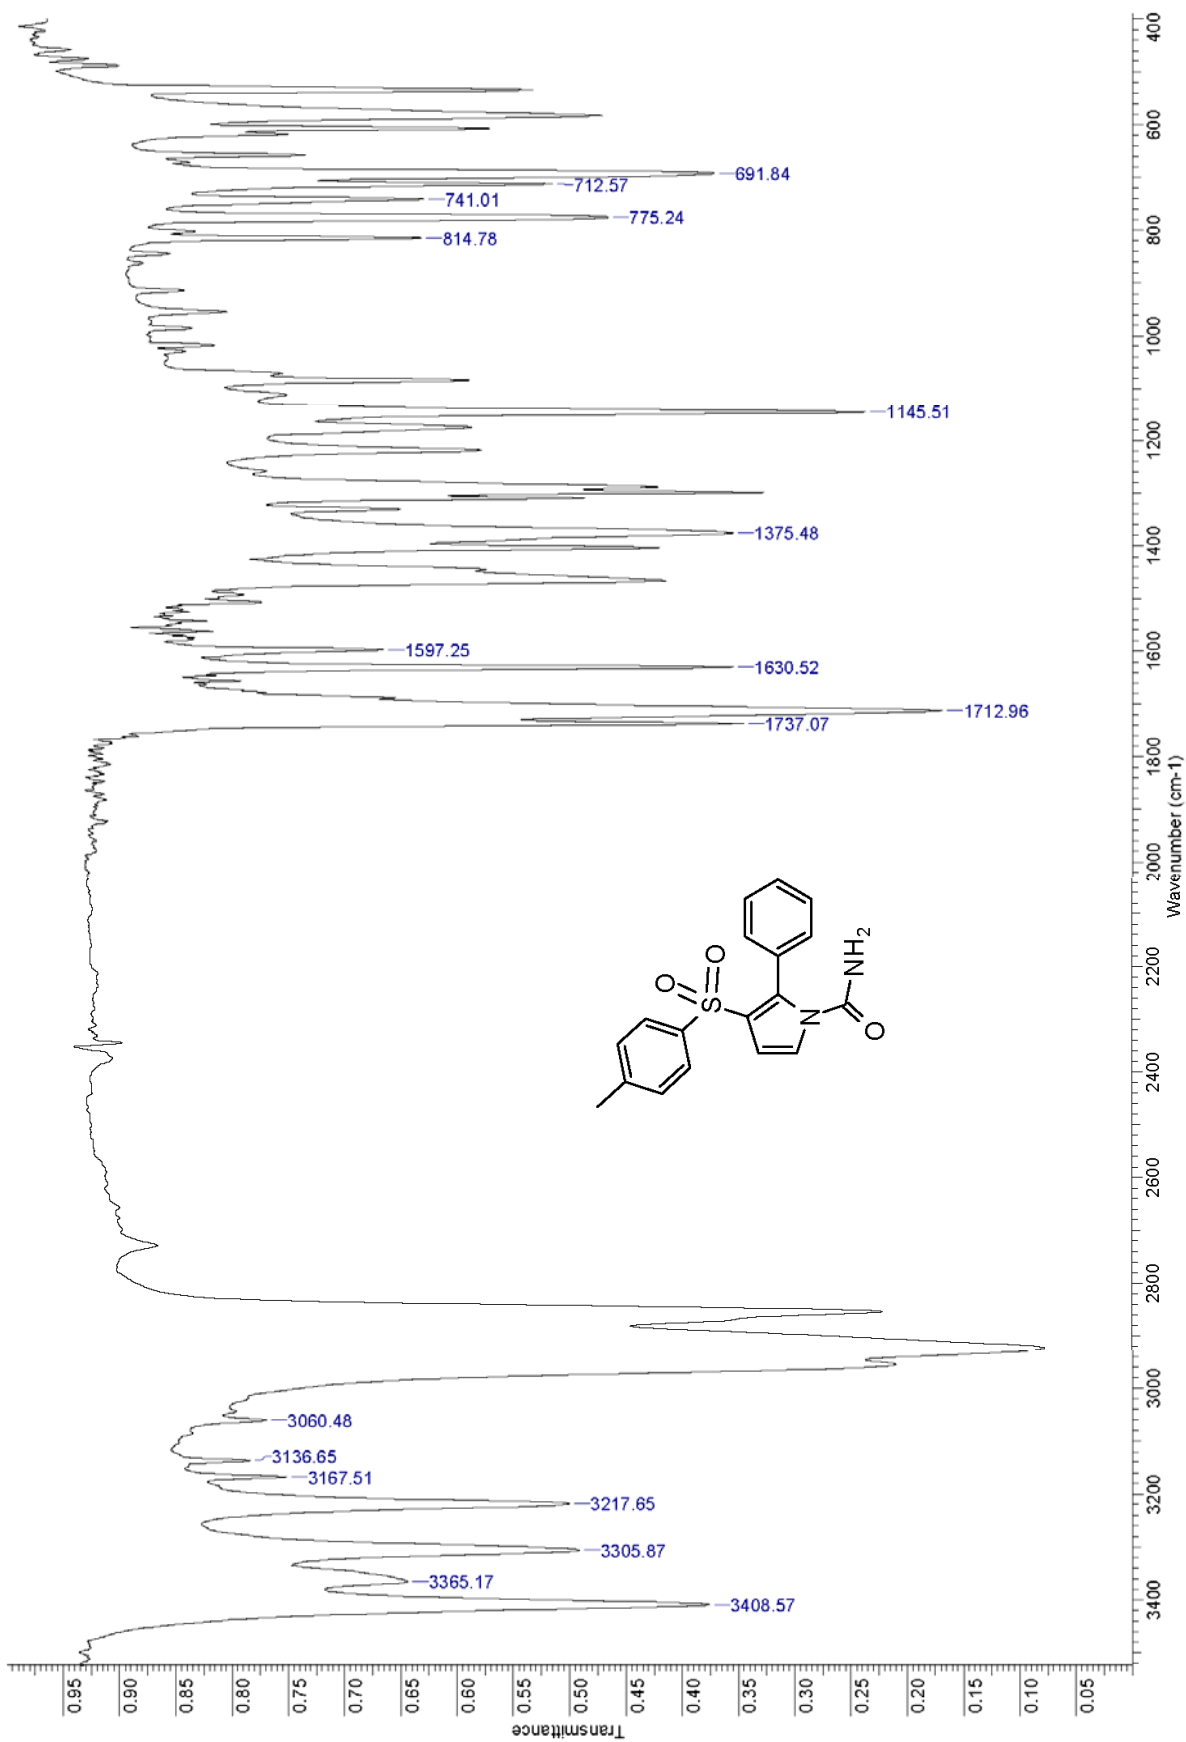

IR spectrum of **25d** (Nujol), Bruker Vector 22
